# Supplementary material for: Optimizing genomic medicine in epilepsy through a gene-customized approach to missense variant interpretation
Source: Genome Res. 2017 Oct;27(10):1715–29. doi: 10.1101/gr.226589.117 (PMC5630035; doi:10.1101/gr.226589.117)
Supplement: Supplemental Material [file supp_gr.226589.117_Supplemental_Data_S1.xlsx]

## Sheet: Data S1
HGNC	Database Source	variant (hg19)	Current Curation	Clinical Significance	HGVS(c.)	HGVS(p.)	PUBMED	Database Phenotype
CDKL5	ClinVar	X-18600056-A-G	Qualified - Mosaic in literature	Pathogenic	ENST00000379989.6:c.449A>G	ENSP00000369325.3:p.Lys150Arg	NO ID	not provided
CDKL5	ClinVar	X-18582622-A-G	Qualified - De novo in literature	Pathogenic	ENST00000379989.6:c.125A>G	ENSP00000369325.3:p.Lys42Arg	18414213	Early infantile epileptic encephalopathy 2
CDKL5	HGMD	X-18598064-C-T	Qualified - De novo in literature	DM	ENST00000379989.6:c.379C>T	ENSP00000369325.3:p.His127Tyr	23934111	Lennox-Gastaut syndrome
CDKL5	HGMD	X-18598080-T-G	Qualified - De novo in literature	DM	ENST00000379989.6:c.395T>G	ENSP00000369325.3:p.Val132Gly	19362436	Rett syndrome variant with infantile spasms
CDKL5	HGMD	X-18600066-C-G	Qualified - De novo in literature	DM	ENST00000379989.6:c.459C>G	ENSP00000369325.3:p.Asp153Glu	26701947	Epileptic encephalopathy early infantile
CDKL5	ClinVar	X-18602433-G-A	Qualified - De novo in literature	Pathogenic	ENST00000379989.6:c.514G>A	ENSP00000369325.3:p.Val172Ile	25356970	N/A
CDKL5	ClinVar & HGMD	X-18602444-A-T	Qualified - De novo in literature	Pathogenic	ENST00000379989.6:c.525A>T	ENSP00000369325.3:p.Arg175Ser	15499549	Early infantile epileptic encephalopathy 2
CDKL5	ClinVar & HGMD	X-18602458-C-T	Qualified - De novo in literature	Pathogenic	ENST00000379989.6:c.539C>T	ENSP00000369325.3:p.Pro180Leu	16611748	Early infantile epileptic encephalopathy 2
CDKL5	HGMD	X-18602464-T-C	Qualified - De novo in literature	DM	ENST00000379989.6:c.545T>C	ENSP00000369325.3:p.Leu182Pro	23708187	Epileptic encephalopathy early-onset
CDKL5	ClinVar & HGMD	X-18606097-A-G	Qualified - De novo in literature	Pathogenic	ENST00000379989.6:c.578A>G	ENSP00000369325.3:p.Asp193Gly	18414213	Early infantile epileptic encephalopathy 2
CDKL5	HGMD	X-18606102-T-C	Qualified - De novo in literature	DM	ENST00000379989.6:c.583T>C	ENSP00000369325.3:p.Trp195Arg	21482751	Encephalopathy with early epilepsy
CDKL5	HGMD	X-18606128-G-C	Qualified - De novo in literature	DM	ENST00000379989.6:c.609G>C	ENSP00000369325.3:p.Glu203Asp	19362436	Rett syndrome variant with infantile spasms
CDKL5	HGMD	X-18606139-G-A	Qualified - De novo in literature	DM	ENST00000379989.6:c.620G>A	ENSP00000369325.3:p.Gly207Glu	23708187	Epileptic encephalopathy
CDKL5	HGMD	X-18606157-G-A	Qualified - De novo in literature	DM	ENST00000379989.6:c.638G>A	ENSP00000369325.3:p.Gly213Glu	23934111	Infantile spasms
CDKL5	HGMD	X-18613535-T-C	Qualified - De novo in literature	DM	ENST00000379989.6:c.812T>C	ENSP00000369325.3:p.Leu271Pro	22264704	Encephalopathy with early epilepsy
CDKL5	ClinVar & HGMD	X-18525274-G-C	Qualified - ClinVar "de novo"	Likely pathogenic	ENST00000379989.6:c.58G>C	ENSP00000369325.3:p.Gly20Arg	20397747	Early infantile epileptic encephalopathy 2
CDKL5	ClinVar & HGMD	X-18525278-A-G	Qualified - ClinVar "de novo"	Likely pathogenic;Pathogenic	ENST00000379989.6:c.62A>G	ENSP00000369325.3:p.Glu21Gly	18414213	Early infantile epileptic encephalopathy 2
CDKL5	ClinVar	X-18528966-A-G	Qualified - ClinVar "de novo"	Pathogenic	ENST00000379989.6:c.91A>G	ENSP00000369325.3:p.Arg31Gly	23064044	Early infantile epileptic encephalopathy 2
CDKL5	ClinVar & HGMD	X-18582616-C-T	Qualified - ClinVar "de novo"	Pathogenic	ENST00000379989.6:c.119C>T	ENSP00000369325.3:p.Ala40Val	17993579	Early infantile epileptic encephalopathy 2
CDKL5	ClinVar	X-18582618-A-T	Qualified - ClinVar "de novo"	Likely pathogenic	ENST00000379989.6:c.121A>T	ENSP00000369325.3:p.Ile41Phe	NO ID	not provided
CDKL5	ClinVar & HGMD	X-18593543-T-A	Qualified - ClinVar "de novo"	Pathogenic	ENST00000379989.6:c.215T>A	ENSP00000369325.3:p.Ile72Asn	16015284	Atypical Rett syndrome
CDKL5	ClinVar	X-18598038-A-G	Qualified - ClinVar "de novo"	Pathogenic	ENST00000379989.6:c.353A>G	ENSP00000369325.3:p.Gln118Arg	22872100	N/A
CDKL5	ClinVar	X-18598041-T-G	Qualified - ClinVar "de novo"	Pathogenic	ENST00000379989.6:c.356T>G	ENSP00000369325.3:p.Leu119Arg	NO ID	not provided
CDKL5	ClinVar	X-18600020-C-T	Qualified - ClinVar "de novo"	Pathogenic	ENST00000379989.6:c.413C>T	ENSP00000369325.3:p.Pro138Leu	NO ID	not provided
CDKL5	ClinVar & HGMD	X-18600062-G-T	Qualified - ClinVar "de novo"	Pathogenic	ENST00000379989.6:c.455G>T	ENSP00000369325.3:p.Cys152Phe	15499549	Early infantile epileptic encephalopathy 2
CDKL5	ClinVar	X-18602445-T-G	Qualified - ClinVar "de novo"	Pathogenic	ENST00000379989.6:c.526T>G	ENSP00000369325.3:p.Trp176Gly	23064044	Early infantile epileptic encephalopathy 2
CDKL5	ClinVar & HGMD	X-18602451-C-T	Qualified - ClinVar "de novo"	Likely pathogenic;Pathogenic	ENST00000379989.6:c.532C>T	ENSP00000369325.3:p.Arg178Trp	19793311	Early infantile epileptic encephalopathy 2
CDKL5	ClinVar & HGMD	X-18602452-G-A	Qualified - ClinVar "de novo"	Likely pathogenic;Pathogenic	ENST00000379989.6:c.533G>A	ENSP00000369325.3:p.Arg178Gln	21770923	Early infantile epileptic encephalopathy 2
CDKL5	ClinVar & HGMD	X-18602452-G-C	Qualified - ClinVar "de novo"	Pathogenic	ENST00000379989.6:c.533G>C	ENSP00000369325.3:p.Arg178Pro	18809835	Early infantile epileptic encephalopathy 2
CDKL5	ClinVar	X-18606096-G-A	Qualified - ClinVar "de novo"	Pathogenic	ENST00000379989.6:c.577G>A	ENSP00000369325.3:p.Asp193Asn	NO ID	not provided
CDKL5	ClinVar & HGMD	X-18606106-C-T	Qualified - ClinVar "de novo"	Likely pathogenic;Pathogenic	ENST00000379989.6:c.587C>T	ENSP00000369325.3:p.Ser196Leu	18414213	Early infantile epileptic encephalopathy 2
CDKL5	ClinVar	X-18606121-T-C	Qualified - ClinVar "de novo"	Pathogenic	ENST00000379989.6:c.602T>C	ENSP00000369325.3:p.Leu201Pro	NO ID	not provided
CDKL5	ClinVar & HGMD	X-18606178-T-C	Qualified - ClinVar "de novo"	Pathogenic	ENST00000379989.6:c.659T>C	ENSP00000369325.3:p.Leu220Pro	17993579	Early infantile epileptic encephalopathy 2
CDKL5	ClinVar & HGMD	X-18606199-T-G	Qualified - ClinVar "de novo"	Likely pathogenic	ENST00000379989.6:c.680T>G	ENSP00000369325.3:p.Leu227Arg	19793311	Early infantile epileptic encephalopathy 2
CDKL5	ClinVar & HGMD	X-18627690-G-A	Qualified - ClinVar "de novo"	Likely pathogenic;Pathogenic	ENST00000379989.6:c.2152G>A	ENSP00000369325.3:p.Val718Met	18790821	Early infantile epileptic encephalopathy 2
CDKL5	ClinVar & HGMD	X-18525275-G-A	Not Qualified - Insufficient Evidence	Likely pathogenic	ENST00000379989.6:c.59G>A	ENSP00000369325.3:p.Gly20Asp	23064044	Epileptic encephalopathy
CDKL5	HGMD	X-18582642-G-A	Not Qualified - Insufficient Evidence	DM	ENST00000379989.6:c.145G>A	ENSP00000369325.3:p.Glu49Lys	23662938	Epileptic encephalopathy early-onset
CDKL5	ClinVar & HGMD	X-18593519-T-C	Not Qualified - Insufficient Evidence	Likely pathogenic	ENST00000379989.6:c.191T>C	ENSP00000369325.3:p.Leu64Pro	19564592	Early infantile epileptic encephalopathy 2
CDKL5	ClinVar & HGMD	X-18593539-A-G	Not Qualified - Insufficient Evidence	Likely pathogenic;Pathogenic	ENST00000379989.6:c.211A>G	ENSP00000369325.3:p.Asn71Asp	22430159	Atypical Rett syndrome
CDKL5	ClinVar	X-18600028-C-T	Not Qualified - Insufficient Evidence	Likely pathogenic	ENST00000379989.6:c.421C>T	ENSP00000369325.3:p.Leu141Phe	NO ID	not provided
CDKL5	HGMD	X-18600040-C-T	Not Qualified - Insufficient Evidence	DM	ENST00000379989.6:c.433C>T	ENSP00000369325.3:p.His145Tyr	23708187	Epileptic encephalopathy
CDKL5	ClinVar & HGMD	X-18602392-G-C	Not Qualified - Insufficient Evidence	Likely pathogenic	ENST00000379989.6:c.473G>C	ENSP00000369325.3:p.Arg158Pro	21309761	Early infantile epileptic encephalopathy 2
CDKL5	ClinVar	X-18602445-T-A	Not Qualified - Insufficient Evidence	Likely pathogenic	ENST00000379989.6:c.526T>A	ENSP00000369325.3:p.Trp176Arg	NO ID	not provided
CDKL5	ClinVar	X-18602445-T-C	Not Qualified - Insufficient Evidence	Likely pathogenic	ENST00000379989.6:c.526T>C	ENSP00000369325.3:p.Trp176Arg	18414213	Early infantile epileptic encephalopathy 2
CDKL5	ClinVar	X-18602461-A-C	Not Qualified - Insufficient Evidence	Pathogenic	ENST00000379989.6:c.542A>C	ENSP00000369325.3:p.Glu181Ala	NO ID	not provided
CDKL5	ClinVar	X-18606145-C-G	Not Qualified - Insufficient Evidence	Likely pathogenic	ENST00000379989.6:c.626C>G	ENSP00000369325.3:p.Pro209Arg	NO ID	not provided
CDKL5	ClinVar & HGMD	X-18616611-A-C	Not Qualified - Insufficient Evidence	Likely pathogenic	ENST00000379989.6:c.855A>C	ENSP00000369325.3:p.Arg285Ser	18414213	Early infantile epileptic encephalopathy 2
CDKL5	ClinVar & HGMD	X-18616619-C-T	Not Qualified - Insufficient Evidence	Pathogenic	ENST00000379989.6:c.863C>T	ENSP00000369325.3:p.Thr288Ile	18809835	Early infantile epileptic encephalopathy 2
GRIN2A	HGMD	16-10274033-G-C	Qualified - Sufficient Segregation Support	DM	ENST00000396573.6:c.236C>G	ENSP00000379818.2:p.Pro79Arg	23933819	Epileptic encephalopathy
GRIN2A	HGMD	16-9858691-T-A	Qualified - Sufficient Segregation Support	DM	ENST00000396573.6:c.2710A>T	ENSP00000379818.2:p.Ile904Phe	23933819	Benign epilepsy with centrotemporal spikes
GRIN2A	ClinVar & HGMD	16-9862854-T-C	Qualified - De novo in literature	Pathogenic	ENST00000396573.6:c.2449A>G	ENSP00000379818.2:p.Met817Val	NO ID	Global developmental delay & epilepsy
GRIN2A	HGMD	16-9862869-G-T	Qualified - De novo in literature	DM	ENST00000396573.6:c.2434C>A	ENSP00000379818.2:p.Leu812Met	24504326	Epileptic encephalopathy
GRIN2A	HGMD	16-9916194-G-A	Qualified - De novo in literature	DM	ENST00000396573.6:c.2095C>T	ENSP00000379818.2:p.Pro699Ser	23933819	Benign epilepsy with centrotemporal spikes
GRIN2A	ClinVar	16-9916205-C-T	Qualified - De novo in literature	Likely pathogenic	ENST00000396573.6:c.2084G>A	ENSP00000379818.2:p.Arg695Gln	NO ID	not provided
GRIN2A	ClinVar & HGMD	16-9923333-A-C	Qualified - De novo in literature	Pathogenic	ENST00000396573.6:c.1954T>G	ENSP00000379818.2:p.Phe652Val	23933820	Focal epilepsy with speech disorder with or without mental retardation
GRIN2A	ClinVar & HGMD	16-9923342-G-C	Qualified - De novo in literature	Pathogenic	ENST00000396573.6:c.1945C>G	ENSP00000379818.2:p.Leu649Val	23033978	Focal epilepsy with speech disorder with or without mental retardation
GRIN2A	ClinVar & HGMD	16-9923442-G-T	Qualified - De novo in literature	Pathogenic	ENST00000396573.6:c.1845C>A	ENSP00000379818.2:p.Asn615Lys	20890276	Focal epilepsy with speech disorder with or without mental retardation
GRIN2A	ClinVar	16-9923446-T-C	Qualified - De novo in literature	Pathogenic	ENST00000396573.6:c.1841A>G	ENSP00000379818.2:p.Asn614Ser	25356970	N/A
GRIN2A	ClinVar & HGMD	16-9928084-G-C	Qualified - De novo in literature	Pathogenic	ENST00000396573.6:c.1655C>G	ENSP00000379818.2:p.Pro552Arg	23033978	Focal epilepsy with speech disorder with or without mental retardation
GRIN2A	HGMD	16-9943635-A-G	Qualified - De novo in literature	DM	ENST00000396573.6:c.1306T>C	ENSP00000379818.2:p.Cys436Arg	23933819	Partial epilepsy atypical benign
GRIN2A	ClinVar	16-9857026-T-C	Qualified - ClinVar "de novo"	Likely pathogenic	ENST00000396573.6:c.4375A>G	ENSP00000379818.2:p.Ser1459Gly	NO ID	N/A
GRIN2A	HGMD	16-10031940-C-T	Not Qualified - Insufficient Evidence	DM	ENST00000396573.6:c.883G>A	ENSP00000379818.2:p.Gly295Ser	23933820	Rolandic epilepsy
GRIN2A	HGMD	16-10032095-G-A	Not Qualified - Insufficient Evidence	DM	ENST00000396573.6:c.728C>T	ENSP00000379818.2:p.Ala243Val	23933819	Benign epilepsy with centrotemporal spikes
GRIN2A	HGMD	16-10032272-A-C	Not Qualified - Insufficient Evidence	DM	ENST00000396573.6:c.551T>G	ENSP00000379818.2:p.Ile184Ser	23933820	Epileptic encephalopathy
GRIN2A	ClinVar	16-10273955-T-C	Not Qualified - Insufficient Evidence	Likely pathogenic	ENST00000396573.6:c.314A>G	ENSP00000379818.2:p.Asp105Gly	23933818	N/A
GRIN2A	HGMD	16-9857650-C-T	Not Qualified - Insufficient Evidence	DM	ENST00000396573.6:c.3751G>A	ENSP00000379818.2:p.Asp1251Asn	23933820	Atypical rolandic epilepsy absence epilepsy
GRIN2A	ClinVar	16-9858060-C-G	Not Qualified - Insufficient Evidence	Likely pathogenic	ENST00000396573.6:c.3341G>C	ENSP00000379818.2:p.Arg1114Thr	NO ID	not provided
GRIN2A	HGMD	16-9858474-T-C	Not Qualified - Insufficient Evidence	DM	ENST00000396573.6:c.2927A>G	ENSP00000379818.2:p.Asn976Ser	23933819	Epileptic encephalopathy
GRIN2A	HGMD	16-9862862-A-G	Not Qualified - Insufficient Evidence	DM	ENST00000396573.6:c.2441T>C	ENSP00000379818.2:p.Ile814Thr	23933819	Benign epilepsy with centrotemporal spikes
GRIN2A	HGMD	16-9892176-T-C	Not Qualified - Insufficient Evidence	DM	ENST00000396573.6:c.2314A>G	ENSP00000379818.2:p.Lys772Glu	23933819	Partial epilepsy atypical benign
GRIN2A	HGMD	16-9892290-C-G	Not Qualified - Insufficient Evidence	DM	ENST00000396573.6:c.2200G>C	ENSP00000379818.2:p.Val734Leu	23933819	Benign epilepsy with centrotemporal spikes
GRIN2A	ClinVar	16-9892293-C-T	Not Qualified - Insufficient Evidence	Likely pathogenic	ENST00000396573.6:c.2197G>A	ENSP00000379818.2:p.Ala733Thr	NO ID	not provided
GRIN2A	ClinVar & HGMD	16-9892299-C-T	Not Qualified - Insufficient Evidence	Likely pathogenic	ENST00000396573.6:c.2191G>A	ENSP00000379818.2:p.Asp731Asn	NO ID	Atypical rolandic epilepsy verbal dyspraxia
GRIN2A	HGMD	16-9892311-C-T	Not Qualified - Insufficient Evidence	DM	ENST00000396573.6:c.2179G>A	ENSP00000379818.2:p.Ala727Thr	23933819	Benign epilepsy with centrotemporal spikes
GRIN2A	ClinVar & HGMD	16-9916143-C-T	Not Qualified - Insufficient Evidence	Likely pathogenic	ENST00000396573.6:c.2146G>A	ENSP00000379818.2:p.Ala716Thr	NO ID	Atypical rolandic epilepsy verbal dyspraxia
GRIN2A	HGMD	16-9916149-C-T	Not Qualified - Insufficient Evidence	DM	ENST00000396573.6:c.2140G>A	ENSP00000379818.2:p.Glu714Lys	23933819	Epileptic encephalopathy
GRIN2A	HGMD	16-9916176-T-C	Not Qualified - Insufficient Evidence	DM	ENST00000396573.6:c.2113A>G	ENSP00000379818.2:p.Met705Val	23933819	Benign epilepsy with centrotemporal spikes
GRIN2A	ClinVar	16-9916239-T-C	Not Qualified - Insufficient Evidence	Likely pathogenic	ENST00000396573.6:c.2050A>G	ENSP00000379818.2:p.Thr684Ala	NO ID	not provided
GRIN2A	HGMD	16-9923280-C-A	Not Qualified - Insufficient Evidence	DM	ENST00000396573.6:c.2007G>T	ENSP00000379818.2:p.Lys669Asn	23933820	Epileptic encephalopathy
GRIN2A	ClinVar	16-9923344-T-C	Not Qualified - Insufficient Evidence	Likely pathogenic	ENST00000396573.6:c.1943A>G	ENSP00000379818.2:p.Asn648Ser	NO ID	not provided
GRIN2A	ClinVar	16-9923357-T-C	Not Qualified - Insufficient Evidence	Pathogenic	ENST00000396573.6:c.1930A>G	ENSP00000379818.2:p.Ser644Gly	NO ID	not provided
GRIN2A	ClinVar	16-9923363-G-T	Not Qualified - Insufficient Evidence	Likely pathogenic	ENST00000396573.6:c.1924C>A	ENSP00000379818.2:p.Leu642Met	NO ID	not provided
GRIN2A	ClinVar & HGMD	16-9934563-G-A	Not Qualified - Insufficient Evidence	Pathogenic	ENST00000396573.6:c.1592C>T	ENSP00000379818.2:p.Thr531Met	23933818	Focal epilepsy with speech disorder with or without mental retardation
GRIN2A	ClinVar & HGMD	16-9934602-C-T	Not Qualified - Insufficient Evidence	Pathogenic	ENST00000396573.6:c.1553G>A	ENSP00000379818.2:p.Arg518His	23933820	Focal epilepsy with speech disorder with or without mental retardation
GRIN2A	ClinVar	16-9934603-G-A	Not Qualified - Insufficient Evidence	Likely pathogenic	ENST00000396573.6:c.1552C>T	ENSP00000379818.2:p.Arg518Cys	NO ID	not provided
GRIN2A	HGMD	16-9934843-C-T	Not Qualified - Insufficient Evidence	DM	ENST00000396573.6:c.1447G>A	ENSP00000379818.2:p.Gly483Arg	23933820	Epileptic encephalopathy atypical rolandic epilepsy dysphasia
GRIN2A	HGMD	16-9984857-G-A	Not Qualified - Insufficient Evidence	DM	ENST00000396573.6:c.1108C>T	ENSP00000379818.2:p.Arg370Trp	23933819	Benign epilepsy with centrotemporal spikes
KCNQ2	ClinVar & HGMD	20-62038706-A-C	Qualified - Sufficient Segregation Support	Pathogenic	ENST00000359125.6:c.1910T>G	ENSP00000352035.2:p.Leu637Arg	NBK32534	Benign familial neonatal seizures 1
KCNQ2	ClinVar & HGMD	20-62039889-T-A	Qualified - Sufficient Segregation Support	Pathogenic	ENST00000359125.6:c.1764A>T	ENSP00000352035.2:p.Arg588Ser	NBK32534	Benign familial neonatal seizures 1
KCNQ2	ClinVar & HGMD	20-62044908-C-T	Qualified - Sufficient Segregation Support	Pathogenic	ENST00000359125.6:c.1658G>A	ENSP00000352035.2:p.Arg553Gln	NBK32534	Benign familial neonatal seizures 1
KCNQ2	HGMD	20-62065195-T-C	Qualified - Sufficient Segregation Support	DM	ENST00000359125.6:c.1085A>G	ENSP00000352035.2:p.Tyr362Cys	24375629	Epilepsy benign neonatal
KCNQ2	HGMD	20-62065207-G-A	Qualified - Sufficient Segregation Support	DM	ENST00000359125.6:c.1073C>T	ENSP00000352035.2:p.Ser358Phe	25982755	Epilepsy benign neonatal
KCNQ2	ClinVar & HGMD	20-62065223-G-C	Qualified - Sufficient Segregation Support	Pathogenic	ENST00000359125.6:c.1057C>G	ENSP00000352035.2:p.Arg353Gly	NBK32534	Benign familial neonatal seizures 1
KCNQ2	ClinVar & HGMD	20-62070962-C-T	Qualified - Sufficient Segregation Support	Pathogenic	ENST00000359125.6:c.916G>A	ENSP00000352035.2:p.Ala306Thr	NBK32534	Benign familial neonatal seizures 1
KCNQ2	ClinVar & HGMD	20-62076018-G-T	Qualified - Sufficient Segregation Support	Pathogenic	ENST00000359125.6:c.684C>A	ENSP00000352035.2:p.His228Gln	NBK32534	Benign familial neonatal seizures 1
KCNQ2	ClinVar & HGMD	20-62076083-G-A	Qualified - Sufficient Segregation Support	Pathogenic	ENST00000359125.6:c.619C>T	ENSP00000352035.2:p.Arg207Trp	NBK32534	Benign familial neonatal seizures 1
KCNQ2	HGMD	20-62076630-C-T	Qualified - Sufficient Segregation Support	DM	ENST00000359125.6:c.475G>A	ENSP00000352035.2:p.Gly159Arg	25982755	Epilepsy benign neonatal
KCNQ2	ClinVar & HGMD	20-62076064-C-T	Qualified - Parental mosaic in literature	Likely pathogenic;Pathogenic	ENST00000359125.6:c.638G>A	ENSP00000352035.2:p.Arg213Gln	18414213	Early infantile epileptic encephalopathy 7
KCNQ2	HGMD	20-62044825-G-C	Qualified - De novo in literature	DM	ENST00000359125.6:c.1741C>G	ENSP00000352035.2:p.Arg581Gly	25262651	Infantile spasms
KCNQ2	HGMD	20-62044877-G-C	Qualified - De novo in literature	DM	ENST00000359125.6:c.1689C>G	ENSP00000352035.2:p.Asp563Glu	23621294	Ohtahara syndrome
KCNQ2	ClinVar & HGMD	20-62044879-C-T	Qualified - De novo in literature	Pathogenic	ENST00000359125.6:c.1687G>A	ENSP00000352035.2:p.Asp563Asn	27602407	Epileptic encephalopathy early-onset
KCNQ2	ClinVar & HGMD	20-62044884-G-A	Qualified - De novo in literature	Pathogenic	ENST00000359125.6:c.1682C>T	ENSP00000352035.2:p.Pro561Leu	27602407	Ohtahara syndrome
KCNQ2	ClinVar & HGMD	20-62044888-G-A	Qualified - De novo in literature	Pathogenic	ENST00000359125.6:c.1678C>T	ENSP00000352035.2:p.Arg560Trp	27602407	Epileptic encephalopathy neonatal
KCNQ2	ClinVar & HGMD	20-62044900-T-C	Qualified - De novo in literature	Likely pathogenic	ENST00000359125.6:c.1666A>G	ENSP00000352035.2:p.Lys556Glu	27602407	Epileptic encephalopathy neonatal
KCNQ2	ClinVar & HGMD	20-62044904-C-A	Qualified - De novo in literature	Pathogenic	ENST00000359125.6:c.1662G>T	ENSP00000352035.2:p.Lys554Asn	12742592	Benign familial neonatal seizures 1
KCNQ2	HGMD	20-62044908-C-A	Qualified - De novo in literature	DM	ENST00000359125.6:c.1658G>T	ENSP00000352035.2:p.Arg553Leu	23621294	Ohtahara syndrome
KCNQ2	HGMD	20-62044911-T-G	Qualified - De novo in literature	DM	ENST00000359125.6:c.1655A>C	ENSP00000352035.2:p.Lys552Thr	24107868	Epileptic encephalopathy neonatal
KCNQ2	ClinVar & HGMD	20-62044930-T-C	Qualified - De novo in literature	Pathogenic	ENST00000359125.6:c.1636A>G	ENSP00000352035.2:p.Met546Val	22275249	Early infantile epileptic encephalopathy 7
KCNQ2	ClinVar & HGMD	20-62069991-G-C	Qualified - De novo in literature	Pathogenic	ENST00000359125.6:c.1010C>G	ENSP00000352035.2:p.Ala337Gly	27602407	Epileptic encephalopathy early-onset
KCNQ2	ClinVar	20-62069992-C-T	Qualified - De novo in literature	Pathogenic	ENST00000359125.6:c.1009G>A	ENSP00000352035.2:p.Ala337Thr	27602407	not provided
KCNQ2	ClinVar	20-62069997-G-A	Qualified - De novo in literature	Likely pathogenic	ENST00000359125.6:c.1004C>T	ENSP00000352035.2:p.Pro335Leu	NO ID	not provided
KCNQ2	ClinVar & HGMD	20-62070004-G-A	Qualified - De novo in literature	Pathogenic	ENST00000359125.6:c.997C>T	ENSP00000352035.2:p.Arg333Trp	27602407	Benign familial neonatal seizures 1
KCNQ2	HGMD	20-62070028-T-C	Qualified - De novo in literature	DM	ENST00000359125.6:c.973A>G	ENSP00000352035.2:p.Arg325Gly	24107868	Epileptic encephalopathy neonatal
KCNQ2	HGMD	20-62070030-T-C	Qualified - De novo in literature	DM	ENST00000359125.6:c.971A>G	ENSP00000352035.2:p.His324Arg	24371303	Epileptic encephalopathy neonatal
KCNQ2	HGMD	20-62070045-T-G	Qualified - De novo in literature	DM	ENST00000359125.6:c.956A>C	ENSP00000352035.2:p.Lys319Thr	26544041	Epileptic encephalopathy early infantile
KCNQ2	HGMD	20-62070952-G-A	Qualified - De novo in literature	DM	ENST00000359125.6:c.926C>T	ENSP00000352035.2:p.Ala309Val	23692823	Epileptic encephalopathy early-onset
KCNQ2	ClinVar	20-62070963-G-T	Qualified - De novo in literature	Pathogenic	ENST00000359125.6:c.915C>A	ENSP00000352035.2:p.Phe305Leu	27602407	not provided
KCNQ2	HGMD	20-62070965-A-G	Qualified - De novo in literature	DM	ENST00000359125.6:c.913T>C	ENSP00000352035.2:p.Phe305Leu	25473036	Epileptic encephalopathy early infantile
KCNQ2	HGMD	20-62070967-A-G	Qualified - De novo in literature	DM	ENST00000359125.6:c.911T>C	ENSP00000352035.2:p.Phe304Ser	23692823	Epileptic encephalopathy early-onset
KCNQ2	HGMD	20-62070992-T-G	Qualified - De novo in literature	DM	ENST00000359125.6:c.886A>C	ENSP00000352035.2:p.Thr296Pro	23692823	Epileptic encephalopathy early-onset
KCNQ2	ClinVar & HGMD	20-62071009-C-T	Qualified - De novo in literature	Pathogenic	ENST00000359125.6:c.869G>A	ENSP00000352035.2:p.Gly290Asp	22275249	Early infantile epileptic encephalopathy 7
KCNQ2	HGMD	20-62071010-C-T	Qualified - De novo in literature	DM	ENST00000359125.6:c.868G>A	ENSP00000352035.2:p.Gly290Ser	23692823	Epileptic encephalopathy early-onset
KCNQ2	HGMD	20-62071018-G-T	Qualified - De novo in literature	DM	ENST00000359125.6:c.860C>A	ENSP00000352035.2:p.Thr287Asn	23692823	Epileptic encephalopathy early-onset
KCNQ2	HGMD	20-62071024-G-T	Qualified - De novo in literature	DM	ENST00000359125.6:c.854C>A	ENSP00000352035.2:p.Pro285His	23621294	Ohtahara syndrome
KCNQ2	ClinVar	20-62071034-C-T	Qualified - De novo in literature	Pathogenic	ENST00000359125.6:c.844G>A	ENSP00000352035.2:p.Asp282Asn	27602407	not provided
KCNQ2	HGMD	20-62071048-G-A	Qualified - De novo in literature	DM	ENST00000359125.6:c.830C>T	ENSP00000352035.2:p.Thr277Ile	26544041	Epileptic encephalopathy early infantile
KCNQ2	HGMD	20-62071051-G-A	Qualified - De novo in literature	DM	ENST00000359125.6:c.827C>T	ENSP00000352035.2:p.Thr276Ile	24463883	Ohtahara syndrome
KCNQ2	ClinVar	20-62071060-A-T	Qualified - De novo in literature	Likely pathogenic	ENST00000359125.6:c.818T>A	ENSP00000352035.2:p.Ile273Asn	27602407	not provided
KCNQ2	ClinVar	20-62073769-C-A	Qualified - De novo in literature	Likely pathogenic	ENST00000359125.6:c.806G>T	ENSP00000352035.2:p.Trp269Leu	27602407	not provided
KCNQ2	HGMD	20-62073773-G-A	Qualified - De novo in literature	DM	ENST00000359125.6:c.802C>T	ENSP00000352035.2:p.Leu268Phe	25880994	Epileptic encephalopathy early-onset
KCNQ2	ClinVar & HGMD	20-62073781-G-A	Qualified - De novo in literature	Pathogenic	ENST00000359125.6:c.794C>T	ENSP00000352035.2:p.Ala265Val	22926866	Early infantile epileptic encephalopathy 7
KCNQ2	HGMD	20-62073782-C-G	Qualified - De novo in literature	DM	ENST00000359125.6:c.793G>C	ENSP00000352035.2:p.Ala265Pro	22275249	Epileptic encephalopathy neonatal
KCNQ2	ClinVar & HGMD	20-62073835-G-C	Qualified - De novo in literature	Pathogenic	ENST00000359125.6:c.740C>G	ENSP00000352035.2:p.Ser247Trp	27602407	Benign familial neonatal seizures 1
KCNQ2	HGMD	20-62073860-C-G	Qualified - De novo in literature	DM	ENST00000359125.6:c.715G>C	ENSP00000352035.2:p.Gly239Arg	23692823	Epileptic encephalopathy early-onset
KCNQ2	ClinVar & HGMD	20-62073865-T-C	Qualified - De novo in literature	Pathogenic	ENST00000359125.6:c.710A>G	ENSP00000352035.2:p.Tyr237Cys	25356970	Epileptic encephalopathy early infantile
KCNQ2	HGMD	20-62073875-T-G	Qualified - De novo in literature	DM	ENST00000359125.6:c.700A>C	ENSP00000352035.2:p.Thr234Pro	25818041	Epileptic encephalopathy neonatal
KCNQ2	HGMD	20-62076053-T-C	Qualified - De novo in literature	DM	ENST00000359125.6:c.649A>G	ENSP00000352035.2:p.Thr217Ala	23360469	Seizures benign infantile
KCNQ2	HGMD	20-62076059-C-T	Qualified - De novo in literature	DM	ENST00000359125.6:c.643G>A	ENSP00000352035.2:p.Gly215Arg	25566516	Epileptic encephalopathy neonatal
KCNQ2	ClinVar & HGMD	20-62076062-G-A	Qualified - De novo in literature	Likely pathogenic;Pathogenic	ENST00000359125.6:c.640C>T	ENSP00000352035.2:p.Arg214Trp	NBK32534	Benign familial neonatal seizures 1
KCNQ2	ClinVar & HGMD	20-62076065-G-A	Qualified - De novo in literature	Pathogenic	ENST00000359125.6:c.637C>T	ENSP00000352035.2:p.Arg213Trp	NBK32534	Benign familial neonatal seizures 1
KCNQ2	ClinVar & HGMD	20-62076067-T-C	Qualified - De novo in literature	Pathogenic	ENST00000359125.6:c.635A>G	ENSP00000352035.2:p.Asp212Gly	NBK32534	Benign familial neonatal seizures 1
KCNQ2	HGMD	20-62076073-C-T	Qualified - De novo in literature	DM	ENST00000359125.6:c.629G>A	ENSP00000352035.2:p.Arg210His	24107868	Epileptic encephalopathy neonatal
KCNQ2	ClinVar & HGMD	20-62076074-G-A	Qualified - De novo in literature	Pathogenic	ENST00000359125.6:c.628C>T	ENSP00000352035.2:p.Arg210Cys	NO ID	Epileptic encephalopathy early-onset
KCNQ2	HGMD	20-62076089-T-C	Qualified - De novo in literature	DM	ENST00000359125.6:c.613A>G	ENSP00000352035.2:p.Ile205Val	22275249	Epileptic encephalopathy neonatal
KCNQ2	ClinVar	20-62076090-C-A	Qualified - De novo in literature	Likely pathogenic	ENST00000359125.6:c.612G>T	ENSP00000352035.2:p.Gln204His	27602407	not provided
KCNQ2	ClinVar	20-62076090-C-G	Qualified - De novo in literature	Pathogenic	ENST00000359125.6:c.612G>C	ENSP00000352035.2:p.Gln204His	27602407	not provided
KCNQ2	HGMD	20-62076100-C-T	Qualified - De novo in literature	DM	ENST00000359125.6:c.602G>A	ENSP00000352035.2:p.Arg201His	23708187	Epileptic encephalopathy early onset
KCNQ2	ClinVar	20-62076109-C-T	Qualified - De novo in literature	Pathogenic	ENST00000359125.6:c.593G>A	ENSP00000352035.2:p.Arg198Gln	NO ID	not provided
KCNQ2	ClinVar & HGMD	20-62076115-G-A	Qualified - De novo in literature	Pathogenic	ENST00000359125.6:c.587C>T	ENSP00000352035.2:p.Ala196Val	27602407	Benign familial neonatal seizures 1
KCNQ2	ClinVar	20-62076119-A-G	Qualified - De novo in literature	Pathogenic	ENST00000359125.6:c.583T>C	ENSP00000352035.2:p.Ser195Pro	27602407	not provided
KCNQ2	ClinVar	20-62076124-G-T	Qualified - De novo in literature	Pathogenic	ENST00000359125.6:c.578C>A	ENSP00000352035.2:p.Ala193Asp	27602407	not provided
KCNQ2	HGMD	20-62076136-C-A	Qualified - De novo in literature	DM	ENST00000359125.6:c.566G>T	ENSP00000352035.2:p.Gly189Val	23692823	Epileptic encephalopathy early-onset
KCNQ2	HGMD	20-62076179-C-A	Qualified - De novo in literature	DM	ENST00000359125.6:c.523G>T	ENSP00000352035.2:p.Val175Leu	23692823	Epileptic encephalopathy early-onset
KCNQ2	HGMD	20-62076179-C-G	Qualified - De novo in literature	DM	ENST00000359125.6:c.523G>C	ENSP00000352035.2:p.Val175Leu	25092550	West syndrome
KCNQ2	ClinVar & HGMD	20-62076674-C-T	Qualified - De novo in literature	Likely pathogenic	ENST00000359125.6:c.431G>A	ENSP00000352035.2:p.Arg144Gln	27602407	Infantile spasms
KCNQ2	ClinVar & HGMD	20-62078122-G-A	Qualified - De novo in literature	Pathogenic	ENST00000359125.6:c.365C>T	ENSP00000352035.2:p.Ser122Leu	27602407	Benign familial neonatal seizures 1
KCNQ2	HGMD	20-62078146-G-A	Qualified - De novo in literature	DM	ENST00000359125.6:c.341C>T	ENSP00000352035.2:p.Thr114Ile	22926866	Epileptic encephalopathy early-onset
KCNQ2	ClinVar & HGMD	20-62044832-C-G	Qualified - ClinVar "de novo"	Pathogenic	ENST00000359125.6:c.1734G>C	ENSP00000352035.2:p.Met578Ile	27602407	Epileptic encephalopathy neonatal
KCNQ2	ClinVar & HGMD	20-62044909-G-A	Qualified - ClinVar "de novo"	Pathogenic	ENST00000359125.6:c.1657C>T	ENSP00000352035.2:p.Arg553Trp	23621294	Ohtahara/West syndrome
KCNQ2	ClinVar & HGMD	20-62070058-C-G	Qualified - ClinVar "de novo"	Pathogenic	ENST00000359125.6:c.943G>C	ENSP00000352035.2:p.Gly315Arg	25741868	Epileptic encephalopathy neonatal
KCNQ2	ClinVar	20-62070961-G-A	Qualified - ClinVar "de novo"	Pathogenic	ENST00000359125.6:c.917C>T	ENSP00000352035.2:p.Ala306Val	25741868	N/A
KCNQ2	ClinVar & HGMD	20-62070997-G-A	Qualified - ClinVar "de novo"	Pathogenic	ENST00000359125.6:c.881C>T	ENSP00000352035.2:p.Ala294Val	23621294	Epileptic encephalopathy early-onset
KCNQ2	ClinVar	20-62071028-A-C	Qualified - ClinVar "de novo"	Pathogenic	ENST00000359125.6:c.850T>G	ENSP00000352035.2:p.Tyr284Asp	25741868	N/A
KCNQ2	ClinVar & HGMD	20-62071037-C-A	Qualified - ClinVar "de novo"	Pathogenic	ENST00000359125.6:c.841G>T	ENSP00000352035.2:p.Gly281Trp	25326637	Epileptic encephalopathy early-onset
KCNQ2	ClinVar	20-62073772-A-G	Qualified - ClinVar "de novo"	Pathogenic	ENST00000359125.6:c.803T>C	ENSP00000352035.2:p.Leu268Pro	25741868	N/A
KCNQ2	ClinVar & HGMD	20-62073782-C-T	Qualified - ClinVar "de novo"	Likely pathogenic;Pathogenic	ENST00000359125.6:c.793G>A	ENSP00000352035.2:p.Ala265Thr	23692823	Benign familial neonatal seizures 1
KCNQ2	ClinVar & HGMD	20-62076101-G-A	Qualified - ClinVar "de novo"	Pathogenic	ENST00000359125.6:c.601C>T	ENSP00000352035.2:p.Arg201Cys	25740509	Epileptic encephalopathy neonatal
KCNQ2	ClinVar	20-62076717-C-T	Qualified - ClinVar "de novo"	Pathogenic	ENST00000359125.6:c.388G>A	ENSP00000352035.2:p.Glu130Lys	25741868	N/A
KCNQ2	ClinVar	20-62078168-G-A	Qualified - ClinVar "de novo"	Pathogenic	ENST00000359125.6:c.319C>T	ENSP00000352035.2:p.Leu107Phe	25741868	N/A
KCNQ2	ClinVar	20-62038469-G-A	Not Qualified - Insufficient Evidence	Pathogenic	ENST00000359125.6:c.2147C>T	ENSP00000352035.2:p.Thr716Ile	25741868	N/A
KCNQ2	HGMD	20-62039877-G-C	Not Qualified - Insufficient Evidence	DM	ENST00000359125.6:c.1776C>G	ENSP00000352035.2:p.Ile592Met	18625963	Epilepsy rolandic without neonatal seizures
KCNQ2	ClinVar	20-62044824-C-A	Not Qualified - Insufficient Evidence	Likely pathogenic	ENST00000359125.6:c.1742G>T	ENSP00000352035.2:p.Arg581Leu	NO ID	not provided
KCNQ2	ClinVar	20-62044824-C-T	Not Qualified - Insufficient Evidence	Pathogenic	ENST00000359125.6:c.1742G>A	ENSP00000352035.2:p.Arg581Gln	NBK32534	Benign familial neonatal seizures 1
KCNQ2	HGMD	20-62044834-T-C	Not Qualified - Insufficient Evidence	DM	ENST00000359125.6:c.1732A>G	ENSP00000352035.2:p.Met578Val	25982755	Epilepsy benign neonatal
KCNQ2	ClinVar & HGMD	20-62044927-G-A	Not Qualified - Insufficient Evidence	Likely pathogenic	ENST00000359125.6:c.1639C>T	ENSP00000352035.2:p.Arg547Trp	NO ID	Seizures benign neonatal
KCNQ2	HGMD	20-62045451-T-C	Not Qualified - Insufficient Evidence	DM	ENST00000359125.6:c.1621A>G	ENSP00000352035.2:p.Arg541Gly	26007637	Epileptic encephalopathy early-onset
KCNQ2	HGMD	20-62046280-C-G	Not Qualified - Insufficient Evidence	DM	ENST00000359125.6:c.1501G>C	ENSP00000352035.2:p.Ala501Pro	25959266	Epileptic encephalopathy type 7
KCNQ2	ClinVar	20-62050985-G-A	Not Qualified - Insufficient Evidence	Pathogenic	ENST00000359125.6:c.1288C>T	ENSP00000352035.2:p.Pro430Ser	NBK32534	Benign familial neonatal seizures 1
KCNQ2	ClinVar & HGMD	20-62065204-G-T	Not Qualified - Insufficient Evidence	Pathogenic	ENST00000359125.6:c.1076C>A	ENSP00000352035.2:p.Thr359Lys	NBK32534	Benign familial neonatal seizures 1
KCNQ2	HGMD	20-62065214-G-C	Not Qualified - Insufficient Evidence	DM	ENST00000359125.6:c.1066C>G	ENSP00000352035.2:p.Leu356Val	25959266	Epileptic encephalopathy type 7
KCNQ2	ClinVar & HGMD	20-62065222-C-T	Not Qualified - Insufficient Evidence	Pathogenic	ENST00000359125.6:c.1058G>A	ENSP00000352035.2:p.Arg353His	NO ID	Epileptic encephalopathy early-onset
KCNQ2	ClinVar	20-62065223-G-A	Not Qualified - Insufficient Evidence	Likely pathogenic	ENST00000359125.6:c.1057C>T	ENSP00000352035.2:p.Arg353Cys	NO ID	not provided
KCNQ2	HGMD	20-62065226-A-G	Not Qualified - Insufficient Evidence	DM	ENST00000359125.6:c.1054T>C	ENSP00000352035.2:p.Ser352Pro	25982755	Epilepsy benign neonatal
KCNQ2	HGMD	20-62065229-G-A	Not Qualified - Insufficient Evidence	DM	ENST00000359125.6:c.1051C>T	ENSP00000352035.2:p.Leu351Phe	24375629	Epilepsy benign neonatal
KCNQ2	HGMD	20-62065229-G-C	Not Qualified - Insufficient Evidence	DM	ENST00000359125.6:c.1051C>G	ENSP00000352035.2:p.Leu351Val	24375629	Epilepsy benign neonatal
KCNQ2	ClinVar	20-62065231-T-A	Not Qualified - Insufficient Evidence	Likely pathogenic	ENST00000359125.6:c.1049A>T	ENSP00000352035.2:p.Asn350Ile	NO ID	not provided
KCNQ2	HGMD	20-62065250-A-G	Not Qualified - Insufficient Evidence	DM	ENST00000359125.6:c.1030T>C	ENSP00000352035.2:p.Trp344Arg	24375629	Epilepsy benign neonatal
KCNQ2	ClinVar	20-62069981-G-C	Not Qualified - Insufficient Evidence	Likely pathogenic	ENST00000359125.6:c.1020C>G	ENSP00000352035.2:p.Ile340Met	NO ID	not provided
KCNQ2	ClinVar & HGMD	20-62069985-A-C	Not Qualified - Insufficient Evidence	Pathogenic	ENST00000359125.6:c.1016T>G	ENSP00000352035.2:p.Leu339Arg	NBK32534	Benign familial neonatal seizures 1
KCNQ2	ClinVar & HGMD	20-62070003-C-T	Not Qualified - Insufficient Evidence	Pathogenic	ENST00000359125.6:c.998G>A	ENSP00000352035.2:p.Arg333Gln	NBK32534	Benign familial neonatal seizures 1
KCNQ2	ClinVar	20-62070962-C-G	Not Qualified - Insufficient Evidence	Pathogenic	ENST00000359125.6:c.916G>C	ENSP00000352035.2:p.Ala306Pro	NO ID	not provided
KCNQ2	HGMD	20-62070977-C-T	Not Qualified - Insufficient Evidence	DM	ENST00000359125.6:c.901G>A	ENSP00000352035.2:p.Gly301Ser	26007637	Epileptic encephalopathy early-onset
KCNQ2	ClinVar & HGMD	20-62070997-G-C	Not Qualified - Insufficient Evidence	Pathogenic	ENST00000359125.6:c.881C>G	ENSP00000352035.2:p.Ala294Gly	NBK32534	Benign familial neonatal seizures 1
KCNQ2	ClinVar & HGMD	20-62071027-T-C	Not Qualified - Insufficient Evidence	Pathogenic	ENST00000359125.6:c.851A>G	ENSP00000352035.2:p.Tyr284Cys	NBK32534	Benign familial neonatal seizures 1
KCNQ2	ClinVar	20-62071030-T-C	Not Qualified - Insufficient Evidence	Pathogenic	ENST00000359125.6:c.848A>G	ENSP00000352035.2:p.Lys283Arg	NO ID	not provided
KCNQ2	HGMD	20-62071043-C-A	Not Qualified - Insufficient Evidence	DM	ENST00000359125.6:c.835G>T	ENSP00000352035.2:p.Gly279Cys	25959266	Epileptic encephalopathy type 7
KCNQ2	ClinVar & HGMD	20-62073763-C-A	Not Qualified - Insufficient Evidence	Pathogenic	ENST00000359125.6:c.812G>T	ENSP00000352035.2:p.Gly271Val	NBK32534	Benign familial neonatal seizures 1
KCNQ2	ClinVar	20-62073785-A-T	Not Qualified - Insufficient Evidence	Likely pathogenic	ENST00000359125.6:c.790T>A	ENSP00000352035.2:p.Tyr264Asn	NO ID	not provided
KCNQ2	ClinVar	20-62073793-A-G	Not Qualified - Insufficient Evidence	Likely pathogenic	ENST00000359125.6:c.782T>C	ENSP00000352035.2:p.Phe261Ser	NO ID	not provided
KCNQ2	ClinVar	20-62073800-C-A	Not Qualified - Insufficient Evidence	Pathogenic	ENST00000359125.6:c.775G>T	ENSP00000352035.2:p.Asp259Tyr	25741868	N/A
KCNQ2	HGMD	20-62073818-C-T	Not Qualified - Insufficient Evidence	DM	ENST00000359125.6:c.757G>A	ENSP00000352035.2:p.Ala253Thr	25959266	Epileptic encephalopathy type 7
KCNQ2	ClinVar & HGMD	20-62073826-A-C	Not Qualified - Insufficient Evidence	Pathogenic	ENST00000359125.6:c.749T>G	ENSP00000352035.2:p.Val250Gly	NBK32534	Benign familial neonatal seizures 1
KCNQ2	ClinVar	20-62073835-G-A	Not Qualified - Insufficient Evidence	Pathogenic	ENST00000359125.6:c.740C>T	ENSP00000352035.2:p.Ser247Leu	NO ID	not provided
KCNQ2	ClinVar & HGMD	20-62073848-G-A	Not Qualified - Insufficient Evidence	Pathogenic	ENST00000359125.6:c.727C>T	ENSP00000352035.2:p.Leu243Phe	NBK32534	Benign familial neonatal seizures 1
KCNQ2	ClinVar	20-62073882-C-A	Not Qualified - Insufficient Evidence	Likely pathogenic	ENST00000359125.6:c.693G>T	ENSP00000352035.2:p.Glu231Asp	25741868	N/A
KCNQ2	ClinVar	20-62073882-C-G	Not Qualified - Insufficient Evidence	Pathogenic	ENST00000359125.6:c.693G>C	ENSP00000352035.2:p.Glu231Asp	25356970	N/A
KCNQ2	ClinVar	20-62073883-T-C	Not Qualified - Insufficient Evidence	Likely pathogenic	ENST00000359125.6:c.692A>G	ENSP00000352035.2:p.Glu231Gly	NO ID	not provided
KCNQ2	ClinVar	20-62076031-A-G	Not Qualified - Insufficient Evidence	Likely pathogenic	ENST00000359125.6:c.671T>C	ENSP00000352035.2:p.Val224Ala	NO ID	not provided
KCNQ2	ClinVar	20-62076066-G-T	Not Qualified - Insufficient Evidence	Pathogenic	ENST00000359125.6:c.636C>A	ENSP00000352035.2:p.Asp212Glu	NO ID	not provided
KCNQ2	ClinVar & HGMD	20-62076080-T-C	Not Qualified - Insufficient Evidence	Pathogenic	ENST00000359125.6:c.622A>G	ENSP00000352035.2:p.Met208Val	NBK32534	Benign familial neonatal seizures 1
KCNQ2	ClinVar & HGMD	20-62076082-C-T	Not Qualified - Insufficient Evidence	Pathogenic	ENST00000359125.6:c.620G>A	ENSP00000352035.2:p.Arg207Gln	NBK32534	Benign familial neonatal seizures 1
KCNQ2	ClinVar	20-62076091-T-C	Not Qualified - Insufficient Evidence	Pathogenic	ENST00000359125.6:c.611A>G	ENSP00000352035.2:p.Gln204Arg	NO ID	not provided
KCNQ2	HGMD	20-62076094-A-G	Not Qualified - Insufficient Evidence	DM	ENST00000359125.6:c.608T>C	ENSP00000352035.2:p.Leu203Pro	26007637	Epileptic encephalopathy early-onset
KCNQ2	ClinVar	20-62076103-A-G	Not Qualified - Insufficient Evidence	Likely pathogenic	ENST00000359125.6:c.599T>C	ENSP00000352035.2:p.Leu200Pro	NO ID	not provided
KCNQ2	HGMD	20-62076629-C-T	Not Qualified - Insufficient Evidence	DM	ENST00000359125.6:c.476G>A	ENSP00000352035.2:p.Gly159Glu	23360469	Seizures benign neonatal
KCNQ2	HGMD	20-62076645-A-C	Not Qualified - Insufficient Evidence	DM	ENST00000359125.6:c.460T>G	ENSP00000352035.2:p.Tyr154Asp	23360469	Seizures benign neonatal-infantile
KCNQ2	ClinVar & HGMD	20-62078131-T-C	Not Qualified - Insufficient Evidence	Pathogenic	ENST00000359125.6:c.356A>G	ENSP00000352035.2:p.Glu119Gly	NBK32534	Benign familial neonatal seizures 1
KCNQ2	HGMD	20-62078147-T-C	Not Qualified - Insufficient Evidence	DM	ENST00000359125.6:c.340A>G	ENSP00000352035.2:p.Thr114Ala	25982755	Epilepsy benign neonatal
KCNQ2	ClinVar	20-62078149-G-A	Not Qualified - Insufficient Evidence	Likely pathogenic	ENST00000359125.6:c.338C>T	ENSP00000352035.2:p.Ser113Phe	NO ID	not provided
KCNQ2	ClinVar & HGMD	20-62073802-T-C	Not Qualified - Inaccessible	Pathogenic	ENST00000359125.6:c.773A>G	ENSP00000352035.2:p.Asn258Ser	NBK32534	Benign familial neonatal seizures 1
KCNT1	ClinVar & HGMD	9-138657034-G-A	Qualified - Sufficient Segregation Support	Pathogenic	ENST00000371757.6:c.1193G>A	ENSP00000360822.2:p.Arg398Gln	23086396	Epilepsy, nocturnal frontal lobe, 5
KCNT1	ClinVar & HGMD	9-138669220-T-C	Qualified - Sufficient Segregation Support	Pathogenic	ENST00000371757.6:c.2386T>C	ENSP00000360822.2:p.Tyr796His	23086396	Epilepsy, nocturnal frontal lobe, 5
KCNT1	ClinVar & HGMD	9-138671257-C-T	Qualified - Sufficient Segregation Support	Pathogenic	ENST00000371757.6:c.2782C>T	ENSP00000360822.2:p.Arg928Cys	18479385	Epilepsy, nocturnal frontal lobe, 5
KCNT1	HGMD	9-138650269-C-G	Qualified - De novo in literature	DM	ENST00000371757.6:c.769C>G	ENSP00000360822.2:p.His257Asp	26122718	Malignant migrating partial seizures in infancy
KCNT1	HGMD	9-138650285-G-A	Qualified - De novo in literature	DM	ENST00000371757.6:c.785G>A	ENSP00000360822.2:p.Arg262Gln	26122718	Malignant migrating partial seizures in infancy
KCNT1	HGMD	9-138650308-C-G	Qualified - De novo in literature	DM	ENST00000371757.6:c.808C>G	ENSP00000360822.2:p.Gln270Glu	26140313	Malignant migrating partial seizures in infancy
KCNT1	ClinVar & HGMD	9-138651532-G-A	Qualified - De novo in literature	Pathogenic	ENST00000371757.6:c.862G>A	ENSP00000360822.2:p.Gly288Ser	24029078	Early infantile epileptic encephalopathy 14
KCNT1	HGMD	9-138657494-C-T	Qualified - De novo in literature	DM	ENST00000371757.6:c.1225C>T	ENSP00000360822.2:p.Pro409Ser	26140313	Malignant migrating partial seizures in infancy
KCNT1	ClinVar & HGMD	9-138657552-G-A	Qualified - De novo in literature	Pathogenic	ENST00000371757.6:c.1283G>A	ENSP00000360822.2:p.Arg428Gln	18414213	Early infantile epileptic encephalopathy 14
KCNT1	HGMD	9-138660693-C-T	Qualified - De novo in literature	DM	ENST00000371757.6:c.1420C>T	ENSP00000360822.2:p.Arg474Cys	NO ID	Malignant migrating partial seizures in infancy
KCNT1	HGMD	9-138660702-G-A	Qualified - De novo in literature	DM	ENST00000371757.6:c.1429G>A	ENSP00000360822.2:p.Ala477Thr	26140313	Malignant migrating partial seizures in infancy
KCNT1	HGMD	9-138661828-A-G	Qualified - De novo in literature	DM	ENST00000371757.6:c.1546A>G	ENSP00000360822.2:p.Met516Val	26784557	Malignant migrating partial seizures in infancy
KCNT1	HGMD	9-138662820-G-C	Qualified - De novo in literature	DM	ENST00000371757.6:c.1887G>C	ENSP00000360822.2:p.Lys629Asn	26369628	Epilepsy
KCNT1	ClinVar & HGMD	9-138667192-C-G	Qualified - De novo in literature	Pathogenic	ENST00000371757.6:c.2280C>G	ENSP00000360822.2:p.Ile760Met	23086397	Early infantile epileptic encephalopathy 14
KCNT1	ClinVar & HGMD	9-138670627-G-A	Qualified - De novo in literature	Pathogenic	ENST00000371757.6:c.2688G>A	ENSP00000360822.2:p.Met896Ile	23086396	Nocturnal frontal lobe epilepsy autosomal dominant
KCNT1	HGMD	9-138671246-C-T	Qualified - De novo in literature	DM	ENST00000371757.6:c.2771C>T	ENSP00000360822.2:p.Pro924Leu	23934111	Infantile spasms
KCNT1	HGMD	9-138671269-T-A	Qualified - De novo in literature	DM	ENST00000371757.6:c.2794T>A	ENSP00000360822.2:p.Phe932Ile	24120652	Leukoencephalopathy and severe epilepsy
KCNT1	ClinVar & HGMD	9-138671275-G-A	Qualified - De novo in literature	Pathogenic	ENST00000371757.6:c.2800G>A	ENSP00000360822.2:p.Ala934Thr	23086397	Early infantile epileptic encephalopathy 14
KCNT1	HGMD	9-138675877-G-A	Qualified - De novo in literature	DM	ENST00000371757.6:c.2849G>A	ENSP00000360822.2:p.Arg950Gln	26122718	Malignant migrating partial seizures in infancy
KCNT1	ClinVar & HGMD	9-138660694-G-A	Qualified - ClinVar "de novo"	Pathogenic	ENST00000371757.6:c.1421G>A	ENSP00000360822.2:p.Arg474His	23086397	Early infantile epileptic encephalopathy 14
KCNT1	ClinVar	9-138606448-C-T	Not Qualified - Insufficient Evidence	Likely pathogenic	ENST00000371757.6:c.136C>T	ENSP00000360822.2:p.Leu46Phe	NO ID	N/A
KCNT1	HGMD	9-138650311-G-T	Not Qualified - Insufficient Evidence	DM	ENST00000371757.6:c.811G>T	ENSP00000360822.2:p.Val271Phe	23599387	Malignant migrating partial seizures in infancy
KCNT1	HGMD	9-138651688-G-A	Not Qualified - Insufficient Evidence	DM	ENST00000371757.6:c.1018G>A	ENSP00000360822.2:p.Val340Met	26122718	Malignant migrating partial seizures in infancy
KCNT1	HGMD	9-138675924-G-A	Not Qualified - Insufficient Evidence	DM	ENST00000371757.6:c.2896G>A	ENSP00000360822.2:p.Ala966Thr	24463883	Ohtahara syndrome
LGI1	ClinVar & HGMD	10-95518037-T-C	Qualified - Sufficient Segregation Support	Pathogenic	ENST00000371418.8:c.136T>C	ENSP00000360472.4:p.Cys46Arg	12205652	Epilepsy, lateral temporal lobe, autosomal dominant
LGI1	HGMD	10-95518038-G-T	Qualified - Sufficient Segregation Support	DM	ENST00000371418.8:c.137G>T	ENSP00000360472.4:p.Cys46Phe	24177143	Epilepsy lateral temporal lobe autosomal dominant
LGI1	HGMD	10-95518546-T-C	Qualified - Sufficient Segregation Support	DM	ENST00000371418.8:c.245T>C	ENSP00000360472.4:p.Ile82Thr	24206907	Epilepsy partial with auditory features
LGI1	HGMD	10-95537177-C-A	Qualified - Sufficient Segregation Support	DM	ENST00000371418.8:c.329C>A	ENSP00000360472.4:p.Ala110Asp	15079011	Epilepsy partial with auditory features
LGI1	ClinVar & HGMD	10-95537308-T-A	Qualified - Sufficient Segregation Support	Pathogenic	ENST00000371418.8:c.365T>A	ENSP00000360472.4:p.Ile122Lys	18625862	Epilepsy, lateral temporal lobe, autosomal dominant
LGI1	HGMD	10-95549859-C-G	Qualified - Sufficient Segregation Support	DM	ENST00000371418.8:c.435C>G	ENSP00000360472.4:p.Ser145Arg	15009222	Epilepsy lateral temporal lobe autosomal dominant
LGI1	HGMD	10-95549885-T-C	Qualified - Sufficient Segregation Support	DM	ENST00000371418.8:c.461T>C	ENSP00000360472.4:p.Leu154Pro	15660777	Epilepsy lateral temporal lobe autosomal dominant
LGI1	HGMD	10-95552594-T-C	Qualified - Sufficient Segregation Support	DM	ENST00000371418.8:c.598T>C	ENSP00000360472.4:p.Cys200Arg	14510822	Epilepsy partial with auditory features
LGI1	HGMD	10-95552637-T-C	Qualified - Sufficient Segregation Support	DM	ENST00000371418.8:c.641T>C	ENSP00000360472.4:p.Leu214Pro	26459092	Epilepsy with auditory features
LGI1	HGMD	10-95556779-T-C	Qualified - Sufficient Segregation Support	DM	ENST00000371418.8:c.893T>C	ENSP00000360472.4:p.Ile298Thr	15079011	Epilepsy partial with auditory features
LGI1	ClinVar & HGMD	10-95556839-T-G	Qualified - Sufficient Segregation Support	Pathogenic	ENST00000371418.8:c.953T>G	ENSP00000360472.4:p.Phe318Cys	12771268	Epilepsy, lateral temporal lobe, autosomal dominant
LGI1	HGMD	10-95557004-T-C	Qualified - Sufficient Segregation Support	DM	ENST00000371418.8:c.1118T>C	ENSP00000360472.4:p.Leu373Ser	25616465	Epilepsy lateral temporal lobe autosomal dominant
LGI1	ClinVar & HGMD	10-95557034-A-C	Qualified - Sufficient Segregation Support	Pathogenic	ENST00000371418.8:c.1148A>C	ENSP00000360472.4:p.Glu383Ala	11810107	Epilepsy, lateral temporal lobe, autosomal dominant
LGI1	HGMD	10-95557363-G-A	Qualified - Sufficient Segregation Support	DM	ENST00000371418.8:c.1477G>A	ENSP00000360472.4:p.Gly493Arg	20659151	Epilepsy focal idiopathic
LGI1	ClinVar & HGMD	10-95537349-C-T	Qualified - De novo in literature	Pathogenic	ENST00000371418.8:c.406C>T	ENSP00000360472.4:p.Arg136Trp	17562837	Epilepsy, lateral temporal lobe, autosomal dominant
LGI1	ClinVar & HGMD	10-95556899-T-C	Qualified - ClinVar "de novo"	Pathogenic	ENST00000371418.8:c.1013T>C	ENSP00000360472.4:p.Phe338Ser	26773249	Epilepsy partial with auditory features
LGI1	ClinVar & HGMD	10-95518025-T-C	Not Qualified - Insufficient Evidence	Pathogenic	ENST00000371418.8:c.124T>C	ENSP00000360472.4:p.Cys42Arg	15079010	Epilepsy partial with auditory features
LGI1	ClinVar & HGMD	10-95518025-T-G	Not Qualified - Insufficient Evidence	Pathogenic	ENST00000371418.8:c.124T>G	ENSP00000360472.4:p.Cys42Gly	15079010	Epilepsy partial with auditory features
LGI1	HGMD	10-95537308-T-C	Not Qualified - Insufficient Evidence	DM	ENST00000371418.8:c.365T>C	ENSP00000360472.4:p.Ile122Thr	21504429	Epilepsy partial with auditory features
LGI1	HGMD	10-95537310-G-A	Not Qualified - Insufficient Evidence	DM	ENST00000371418.8:c.367G>A	ENSP00000360472.4:p.Glu123Lys	19191227	Epilepsy lateral temporal lobe autosomal dominant
LGI1	HGMD	10-95552531-T-C	Not Qualified - Insufficient Evidence	DM	ENST00000371418.8:c.535T>C	ENSP00000360472.4:p.Cys179Arg	21504429	Epilepsy partial with auditory features
LGI1	ClinVar & HGMD	10-95552964-T-C	Not Qualified - Insufficient Evidence	Pathogenic	ENST00000371418.8:c.695T>C	ENSP00000360472.4:p.Leu232Pro	17296837	Epilepsy, lateral temporal lobe, autosomal dominant
LGI1	HGMD	10-95556742-T-C	Not Qualified - Insufficient Evidence	DM	ENST00000371418.8:c.856T>C	ENSP00000360472.4:p.Cys286Arg	25616465	Epilepsy lateral temporal lobe autosomal dominant
LGI1	HGMD	10-95557024-A-G	Not Qualified - Insufficient Evidence	DM	ENST00000371418.8:c.1138A>G	ENSP00000360472.4:p.Thr380Ala	23621105	Epilepsy lateral temporal lobe autosomal dominant
LGI1	HGMD	10-95557181-T-A	Not Qualified - Insufficient Evidence	DM	ENST00000371418.8:c.1295T>A	ENSP00000360472.4:p.Val432Glu	14510822	Epilepsy partial with auditory features
LGI1	ClinVar & HGMD	10-95557304-C-T	Not Qualified - Insufficient Evidence	Pathogenic	ENST00000371418.8:c.1418C>T	ENSP00000360472.4:p.Ser473Leu	15079010	Epilepsy partial with auditory features
LGI1	HGMD	10-95557307-G-A	Not Qualified - Insufficient Evidence	DM	ENST00000371418.8:c.1421G>A	ENSP00000360472.4:p.Arg474Gln	19780791	Epilepsy lateral temporal lobe autosomal dominant
PCDH19	ClinVar & HGMD	X-99662274-A-T	Qualified - Sufficient Segregation Support	Pathogenic	ENST00000373034.8:c.1322T>A	ENSP00000362125.4:p.Val441Glu	18469813	Early infantile epileptic encephalopathy 9
PCDH19	HGMD	X-99661816-C-G	Qualified - De novo in literature	DM	ENST00000373034.8:c.1780G>C	ENSP00000362125.4:p.Asp594His	23334464	Epilepsy and mental retardation limited to females
PCDH19	ClinVar & HGMD	X-99661925-G-C	Qualified - De novo in literature	Pathogenic	ENST00000373034.8:c.1671C>G	ENSP00000362125.4:p.Asn557Lys	19752159	Early infantile epileptic encephalopathy 9
PCDH19	HGMD	X-99661947-C-G	Qualified - De novo in literature	DM	ENST00000373034.8:c.1649G>C	ENSP00000362125.4:p.Arg550Pro	25218114	Epilepsy early-onset
PCDH19	HGMD	X-99662059-C-G	Qualified - De novo in literature	DM	ENST00000373034.8:c.1537G>C	ENSP00000362125.4:p.Gly513Arg	21480887	Focal seizures with secondary generalization
PCDH19	HGMD	X-99662298-A-G	Qualified - De novo in literature	DM	ENST00000373034.8:c.1298T>C	ENSP00000362125.4:p.Leu433Pro	21480887	Generalized tonic-clonic seizures
PCDH19	HGMD	X-99662418-G-A	Qualified - De novo in literature	DM	ENST00000373034.8:c.1178C>T	ENSP00000362125.4:p.Pro393Leu	25499160	Epilepsy early-onset
PCDH19	HGMD	X-99662465-G-T	Qualified - De novo in literature	DM	ENST00000373034.8:c.1131C>A	ENSP00000362125.4:p.Asp377Glu	22267240	Epileptic encephalopathy
PCDH19	HGMD	X-99662473-C-A	Qualified - De novo in literature	DM	ENST00000373034.8:c.1123G>T	ENSP00000362125.4:p.Asp375Tyr	23334464	Epilepsy and mental retardation limited to females
PCDH19	ClinVar & HGMD	X-99662565-G-A	Qualified - De novo in literature	Pathogenic	ENST00000373034.8:c.1031C>T	ENSP00000362125.4:p.Pro344Leu	NO ID	Epilepsy and mental retardation limited to females
PCDH19	HGMD	X-99662573-G-C	Qualified - De novo in literature	DM	ENST00000373034.8:c.1023C>G	ENSP00000362125.4:p.Asp341Glu	21053371	Epilepsy and mental retardation limited to females
PCDH19	HGMD	X-99662574-T-C	Qualified - De novo in literature	DM	ENST00000373034.8:c.1022A>G	ENSP00000362125.4:p.Asp341Gly	23334464	Epilepsy and mental retardation limited to females
PCDH19	ClinVar & HGMD	X-99662577-T-C	Qualified - De novo in literature	Pathogenic	ENST00000373034.8:c.1019A>G	ENSP00000362125.4:p.Asn340Ser	NO ID	Epileptic encephalopathy
PCDH19	HGMD	X-99662659-C-T	Qualified - De novo in literature	DM	ENST00000373034.8:c.937G>A	ENSP00000362125.4:p.Glu313Lys	25227595	Epilepsy and mental retardation limited to females
PCDH19	HGMD	X-99662770-A-G	Qualified - De novo in literature	DM	ENST00000373034.8:c.826T>C	ENSP00000362125.4:p.Ser276Pro	19752159	Epilepsy and mental retardation limited to females
PCDH19	HGMD	X-99662806-C-G	Qualified - De novo in literature	DM	ENST00000373034.8:c.790G>C	ENSP00000362125.4:p.Asp264His	22946748	Focal epilepsy
PCDH19	HGMD	X-99662850-T-C	Qualified - De novo in literature	DM	ENST00000373034.8:c.746A>G	ENSP00000362125.4:p.Glu249Gly	22504056	Focal epilepsy
PCDH19	HGMD	X-99662890-G-A	Qualified - De novo in literature	DM	ENST00000373034.8:c.706C>T	ENSP00000362125.4:p.Pro236Ser	21480887	Generalized tonic-clonic seizures
PCDH19	HGMD	X-99662895-T-C	Qualified - De novo in literature	DM	ENST00000373034.8:c.701A>G	ENSP00000362125.4:p.Asn234Ser	22267240	Epileptic encephalopathy
PCDH19	ClinVar & HGMD	X-99662901-T-C	Qualified - De novo in literature	Pathogenic	ENST00000373034.8:c.695A>G	ENSP00000362125.4:p.Asn232Ser	NO ID	Epileptic encephalopathy
PCDH19	HGMD	X-99663151-G-A	Qualified - De novo in literature	DM	ENST00000373034.8:c.445C>T	ENSP00000362125.4:p.Pro149Ser	25227595	Epilepsy and mental retardation limited to females
PCDH19	HGMD	X-99663327-T-A	Qualified - De novo in literature	DM	ENST00000373034.8:c.269A>T	ENSP00000362125.4:p.Asp90Val	23712037	Epilepsy early-onset
PCDH19	HGMD	X-99663505-C-T	Qualified - De novo in literature	DM	ENST00000373034.8:c.91G>A	ENSP00000362125.4:p.Glu31Lys	23334464	Epilepsy and mental retardation limited to females
PCDH19	HGMD	X-99663522-A-G	Qualified - De novo in literature	DM	ENST00000373034.8:c.74T>C	ENSP00000362125.4:p.Leu25Pro	21519002	Epilepsy & mental retardation
PCDH19	ClinVar	X-99662900-A-T	Qualified - ClinVar "de novo"	Pathogenic	ENST00000373034.8:c.696T>A	ENSP00000362125.4:p.Asn232Lys	NO ID	not provided
PCDH19	ClinVar	X-99663226-C-A	Qualified - ClinVar "de novo"	Pathogenic	ENST00000373034.8:c.370G>T	ENSP00000362125.4:p.Asp124Tyr	NO ID	not provided
PCDH19	ClinVar	X-99663235-C-G	Qualified - ClinVar "de novo"	Pathogenic	ENST00000373034.8:c.361G>C	ENSP00000362125.4:p.Asp121His	NO ID	not provided
PCDH19	HGMD	X-99661641-A-G	Not Qualified - Insufficient Evidence	DM	ENST00000373034.8:c.1955T>C	ENSP00000362125.4:p.Leu652Pro	22504056	Focal epilepsy
PCDH19	HGMD	X-99661672-C-T	Not Qualified - Insufficient Evidence	DM	ENST00000373034.8:c.1924G>A	ENSP00000362125.4:p.Val642Met	22267240	Epileptic encephalopathy
PCDH19	ClinVar	X-99661723-T-C	Not Qualified - Insufficient Evidence	Likely pathogenic	ENST00000373034.8:c.1873A>G	ENSP00000362125.4:p.Arg625Gly	NO ID	not provided
PCDH19	HGMD	X-99661744-C-T	Not Qualified - Insufficient Evidence	DM	ENST00000373034.8:c.1852G>A	ENSP00000362125.4:p.Asp618Asn	21053371	Epilepsy and mental retardation limited to females
PCDH19	HGMD	X-99661794-C-T	Not Qualified - Insufficient Evidence	DM	ENST00000373034.8:c.1802G>A	ENSP00000362125.4:p.Gly601Asp	23334464	Epilepsy and mental retardation limited to females
PCDH19	HGMD	X-99661809-T-A	Not Qualified - Insufficient Evidence	DM	ENST00000373034.8:c.1787A>T	ENSP00000362125.4:p.Asp596Val	23712037	Epilepsy early-onset
PCDH19	HGMD	X-99661810-C-A	Not Qualified - Insufficient Evidence	DM	ENST00000373034.8:c.1786G>T	ENSP00000362125.4:p.Asp596Tyr	26353454	Epilepsy early-onset
PCDH19	HGMD	X-99661810-C-G	Not Qualified - Insufficient Evidence	DM	ENST00000373034.8:c.1786G>C	ENSP00000362125.4:p.Asp596His	22946748	Focal epilepsy
PCDH19	HGMD	X-99661896-G-A	Not Qualified - Insufficient Evidence	DM	ENST00000373034.8:c.1700C>T	ENSP00000362125.4:p.Pro567Leu	21053371	Epilepsy and mental retardation limited to females
PCDH19	ClinVar & HGMD	X-99661914-G-C	Not Qualified - Insufficient Evidence	Pathogenic	ENST00000373034.8:c.1682C>G	ENSP00000362125.4:p.Pro561Arg	NO ID	Epilepsy and mental retardation limited to females
PCDH19	HGMD	X-99661915-G-A	Not Qualified - Insufficient Evidence	DM	ENST00000373034.8:c.1681C>T	ENSP00000362125.4:p.Pro561Ser	23708187	Epileptic encephalopathy
PCDH19	HGMD	X-99661968-A-G	Not Qualified - Insufficient Evidence	DM	ENST00000373034.8:c.1628T>C	ENSP00000362125.4:p.Leu543Pro	19214208	Epileptic encephalopathy
PCDH19	ClinVar	X-99662245-G-A	Not Qualified - Insufficient Evidence	Likely pathogenic	ENST00000373034.8:c.1351C>T	ENSP00000362125.4:p.Pro451Ser	NO ID	not provided
PCDH19	ClinVar	X-99662261-G-T	Not Qualified - Insufficient Evidence	Likely pathogenic	ENST00000373034.8:c.1335C>A	ENSP00000362125.4:p.Asp445Glu	NO ID	not provided
PCDH19	HGMD	X-99662347-C-G	Not Qualified - Insufficient Evidence	DM	ENST00000373034.8:c.1249G>C	ENSP00000362125.4:p.Asp417His	26353454	Epilepsy early-onset
PCDH19	ClinVar	X-99662355-T-A	Not Qualified - Insufficient Evidence	Pathogenic	ENST00000373034.8:c.1241A>T	ENSP00000362125.4:p.Glu414Val	NO ID	not provided
PCDH19	ClinVar	X-99662482-G-A	Not Qualified - Insufficient Evidence	Pathogenic	ENST00000373034.8:c.1114C>T	ENSP00000362125.4:p.Arg372Trp	NO ID	not provided
PCDH19	HGMD	X-99662565-G-C	Not Qualified - Insufficient Evidence	DM	ENST00000373034.8:c.1031C>G	ENSP00000362125.4:p.Pro344Arg	22267240	Epileptic encephalopathy
PCDH19	HGMD	X-99662677-C-T	Not Qualified - Insufficient Evidence	DM	ENST00000373034.8:c.919G>A	ENSP00000362125.4:p.Glu307Lys	25227595	Epilepsy and mental retardation limited to females
PCDH19	HGMD	X-99662772-T-G	Not Qualified - Insufficient Evidence	DM	ENST00000373034.8:c.824A>C	ENSP00000362125.4:p.Tyr275Ser	23334464	Epilepsy and mental retardation limited to females
PCDH19	HGMD	X-99662773-A-T	Not Qualified - Insufficient Evidence	DM	ENST00000373034.8:c.823T>A	ENSP00000362125.4:p.Tyr275Asn	23334464	Epilepsy and mental retardation limited to females
PCDH19	HGMD	X-99662811-G-T	Not Qualified - Insufficient Evidence	DM	ENST00000373034.8:c.785C>A	ENSP00000362125.4:p.Ala262Asp	22267240	Epileptic encephalopathy
PCDH19	HGMD	X-99662849-T-A	Not Qualified - Insufficient Evidence	DM	ENST00000373034.8:c.747A>T	ENSP00000362125.4:p.Glu249Asp	21053371	Epilepsy and mental retardation limited to females
PCDH19	ClinVar	X-99662901-T-A	Not Qualified - Insufficient Evidence	Likely pathogenic	ENST00000373034.8:c.695A>T	ENSP00000362125.4:p.Asn232Ile	18414213	Early infantile epileptic encephalopathy 9
PCDH19	ClinVar	X-99662962-C-G	Not Qualified - Insufficient Evidence	Likely pathogenic	ENST00000373034.8:c.634G>C	ENSP00000362125.4:p.Asp212His	NO ID	not provided
PCDH19	HGMD	X-99662979-A-T	Not Qualified - Insufficient Evidence	DM	ENST00000373034.8:c.617T>A	ENSP00000362125.4:p.Phe206Tyr	21053371	Epilepsy and mental retardation limited to females
PCDH19	HGMD	X-99663001-C-G	Not Qualified - Insufficient Evidence	DM	ENST00000373034.8:c.595G>C	ENSP00000362125.4:p.Glu199Gln	19214208	Epileptic encephalopathy
PCDH19	HGMD	X-99663003-C-A	Not Qualified - Insufficient Evidence	DM	ENST00000373034.8:c.593G>T	ENSP00000362125.4:p.Arg198Leu	23712037	Epilepsy early-onset
PCDH19	HGMD	X-99663025-C-G	Not Qualified - Insufficient Evidence	DM	ENST00000373034.8:c.571G>C	ENSP00000362125.4:p.Val191Leu	22050978	Epilepsy and mental retardation limited to females
PCDH19	HGMD	X-99663027-A-C	Not Qualified - Insufficient Evidence	DM	ENST00000373034.8:c.569T>G	ENSP00000362125.4:p.Leu190Arg	22267240	Epileptic encephalopathy
PCDH19	HGMD	X-99663127-C-T	Not Qualified - Insufficient Evidence	DM	ENST00000373034.8:c.469G>A	ENSP00000362125.4:p.Asp157Asn	23712037	Epilepsy early-onset
PCDH19	ClinVar	X-99663133-C-T	Not Qualified - Insufficient Evidence	Likely pathogenic	ENST00000373034.8:c.463G>A	ENSP00000362125.4:p.Asp155Asn	NO ID	not provided
PCDH19	HGMD	X-99663139-C-T	Not Qualified - Insufficient Evidence	DM	ENST00000373034.8:c.457G>A	ENSP00000362125.4:p.Ala153Thr	22267240	Epileptic encephalopathy
PCDH19	ClinVar & HGMD	X-99663159-G-C	Not Qualified - Insufficient Evidence	Pathogenic	ENST00000373034.8:c.437C>G	ENSP00000362125.4:p.Thr146Arg	NO ID	Epilepsy and mental retardation limited to females
PCDH19	ClinVar	X-99663172-C-G	Not Qualified - Insufficient Evidence	Likely pathogenic	ENST00000373034.8:c.424G>C	ENSP00000362125.4:p.Ala142Pro	NO ID	not provided
PCDH19	HGMD	X-99663180-G-A	Not Qualified - Insufficient Evidence	DM	ENST00000373034.8:c.416C>T	ENSP00000362125.4:p.Ser139Leu	23712037	Epilepsy early-onset
PCDH19	ClinVar	X-99663222-T-C	Not Qualified - Insufficient Evidence	Likely pathogenic	ENST00000373034.8:c.374A>G	ENSP00000362125.4:p.Asn125Ser	23757202	not provided
PCDH19	HGMD	X-99663226-C-T	Not Qualified - Insufficient Evidence	DM	ENST00000373034.8:c.370G>A	ENSP00000362125.4:p.Asp124Asn	26544041	Febrile seizures with intellectual / developmental disabilities
PCDH19	ClinVar	X-99663227-G-T	Not Qualified - Insufficient Evidence	Likely pathogenic	ENST00000373034.8:c.369C>A	ENSP00000362125.4:p.Asn123Lys	NO ID	not provided
PCDH19	HGMD	X-99663235-C-T	Not Qualified - Insufficient Evidence	DM	ENST00000373034.8:c.361G>A	ENSP00000362125.4:p.Asp121Asn	19214208	Epileptic encephalopathy
PCDH19	HGMD	X-99663354-A-C	Not Qualified - Insufficient Evidence	DM	ENST00000373034.8:c.242T>G	ENSP00000362125.4:p.Leu81Arg	21053371	Epilepsy and mental retardation limited to females
PCDH19	HGMD	X-99663381-A-C	Not Qualified - Insufficient Evidence	DM	ENST00000373034.8:c.215T>G	ENSP00000362125.4:p.Val72Gly	22050978	Epilepsy and mental retardation limited to females
SCN1A	HGMD	2-166848185-A-G	Qualified - Sufficient Segregation Support	DM	ENST00000303395.8:c.5600T>C	ENSP00000303540.4:p.Ile1867Thr	18251839	Generalized epilepsy with febrile seizures plus
SCN1A	HGMD	2-166848560-T-C	Qualified - Sufficient Segregation Support	DM	ENST00000303395.8:c.5225A>G	ENSP00000303540.4:p.Asp1742Gly	15694566	Generalized epilepsy with febrile seizures plus
SCN1A	HGMD	2-166848731-G-A	Qualified - Sufficient Segregation Support	DM	ENST00000303395.8:c.5054C>T	ENSP00000303540.4:p.Ala1685Val	11524484	Febrile seizures
SCN1A	HGMD	2-166848817-G-C	Qualified - Sufficient Segregation Support	DM	ENST00000303395.8:c.4968C>G	ENSP00000303540.4:p.Ile1656Met	11254444	Generalized epilepsy with febrile seizures plus
SCN1A	HGMD	2-166848842-C-T	Qualified - Sufficient Segregation Support	DM	ENST00000303395.8:c.4943G>A	ENSP00000303540.4:p.Arg1648His	10742094	Generalised epilepsy with febrile seizures plus 2
SCN1A	HGMD	2-166859098-C-A	Qualified - Sufficient Segregation Support	DM	ENST00000303395.8:c.4168G>T	ENSP00000303540.4:p.Val1390Leu	21775168	Generalised epilepsy with febrile seizures plus 2
SCN1A	HGMD	2-166859209-C-G	Qualified - Sufficient Segregation Support	DM	ENST00000303395.8:c.4057G>C	ENSP00000303540.4:p.Val1353Leu	11254444	Generalized epilepsy with febrile seizures plus
SCN1A	HGMD	2-166870349-A-G	Qualified - Sufficient Segregation Support	DM	ENST00000303395.8:c.3610T>C	ENSP00000303540.4:p.Trp1204Arg	11254445	Generalized epilepsy with febrile seizures plus
SCN1A	ClinVar & HGMD	2-166894608-G-A	Qualified - Sufficient Segregation Support	Pathogenic	ENST00000303395.8:c.2624C>T	ENSP00000303540.4:p.Thr875Met	10521305	Generalized epilepsy with febrile seizures plus, type 1
SCN1A	HGMD	2-166908406-G-C	Qualified - Sufficient Segregation Support	DM	ENST00000303395.8:c.787C>G	ENSP00000303540.4:p.Leu263Val	19220312	Hemiplegic migraine and epilepsy
SCN1A	HGMD	2-166911173-G-A	Qualified - Sufficient Segregation Support	DM	ENST00000303395.8:c.577C>T	ENSP00000303540.4:p.Leu193Phe	21843600	Generalized epilepsy with febrile seizures plus
SCN1A	ClinVar & HGMD	2-166912960-A-G	Qualified - Sufficient Segregation Support	Pathogenic	ENST00000303395.8:c.434T>C	ENSP00000303540.4:p.Met145Thr	16326807	Generalized epilepsy with febrile seizures plus, type 2
SCN1A	HGMD	2-166848142-C-G	Qualified - SCN1A databases support "de novo"	DM	ENST00000303395.8:c.5643G>C	ENSP00000303540.4:p.Glu1881Asp	14504318	Myoclonic epilepsy of infancy
SCN1A	HGMD	2-166848269-A-G	Qualified - SCN1A databases support "de novo"	DM	ENST00000303395.8:c.5516T>C	ENSP00000303540.4:p.Leu1839Pro	26438699	Dravet syndrome
SCN1A	HGMD	2-166848282-G-A	Qualified - SCN1A databases support "de novo"	DM	ENST00000303395.8:c.5503C>T	ENSP00000303540.4:p.Leu1835Phe	18930999	Dravet syndrome
SCN1A	HGMD	2-166848350-C-G	Qualified - SCN1A databases support "de novo"	DM	ENST00000303395.8:c.5435G>C	ENSP00000303540.4:p.Trp1812Ser	18930999	Dravet syndrome
SCN1A	HGMD	2-166848351-A-C	Qualified - SCN1A databases support "de novo"	DM	ENST00000303395.8:c.5434T>G	ENSP00000303540.4:p.Trp1812Gly	12566275	Myoclonic epilepsy of infancy
SCN1A	HGMD	2-166848363-A-T	Qualified - SCN1A databases support "de novo"	DM	ENST00000303395.8:c.5422T>A	ENSP00000303540.4:p.Phe1808Ile	18930999	Dravet syndrome
SCN1A	HGMD	2-166848410-G-C	Qualified - SCN1A databases support "de novo"	DM	ENST00000303395.8:c.5375C>G	ENSP00000303540.4:p.Ala1792Gly	23808377	Dravet syndrome
SCN1A	HGMD	2-166848411-C-T	Qualified - SCN1A databases support "de novo"	DM	ENST00000303395.8:c.5374G>A	ENSP00000303540.4:p.Ala1792Thr	23195492	Myoclonic epilepsy of infancy
SCN1A	HGMD	2-166848437-G-A	Qualified - SCN1A databases support "de novo"	DM	ENST00000303395.8:c.5348C>T	ENSP00000303540.4:p.Ala1783Val	17561957	Myoclonic epilepsy of infancy
SCN1A	HGMD	2-166848438-C-T	Qualified - SCN1A databases support "de novo"	DM	ENST00000303395.8:c.5347G>A	ENSP00000303540.4:p.Ala1783Thr	17347258	Myoclonic epilepsy of infancy
SCN1A	HGMD	2-166848444-A-G	Qualified - SCN1A databases support "de novo"	DM	ENST00000303395.8:c.5341T>C	ENSP00000303540.4:p.Tyr1781His	18930999	Dravet syndrome
SCN1A	HGMD	2-166848446-A-G	Qualified - SCN1A databases support "de novo"	DM	ENST00000303395.8:c.5339T>C	ENSP00000303540.4:p.Met1780Thr	12821740	Myoclonic epilepsy of infancy
SCN1A	HGMD	2-166848467-G-A	Qualified - SCN1A databases support "de novo"	DM	ENST00000303395.8:c.5318C>T	ENSP00000303540.4:p.Ser1773Phe	17054684	Myoclonic epilepsy of infancy
SCN1A	HGMD	2-166848474-T-A	Qualified - SCN1A databases support "de novo"	DM	ENST00000303395.8:c.5311A>T	ENSP00000303540.4:p.Ile1771Phe	18330841	Cryptogenic focal epilepsy
SCN1A	HGMD	2-166848490-A-T	Qualified - SCN1A databases support "de novo"	DM	ENST00000303395.8:c.5295T>A	ENSP00000303540.4:p.Phe1765Leu	20550552	Partial epilepsy with febrile seizures plus
SCN1A	HGMD	2-166848500-C-T	Qualified - SCN1A databases support "de novo"	DM	ENST00000303395.8:c.5285G>A	ENSP00000303540.4:p.Gly1762Glu	17054684	Myoclonic epilepsy of infancy
SCN1A	HGMD	2-166848525-C-T	Qualified - SCN1A databases support "de novo"	DM	ENST00000303395.8:c.5260G>A	ENSP00000303540.4:p.Gly1754Arg	22071555	Dravet syndrome
SCN1A	HGMD	2-166848539-C-T	Qualified - SCN1A databases support "de novo"	DM	ENST00000303395.8:c.5246G>A	ENSP00000303540.4:p.Gly1749Glu	12754708	Myoclonic epilepsy of infancy
SCN1A	HGMD	2-166848564-A-G	Qualified - SCN1A databases support "de novo"	DM	ENST00000303395.8:c.5221T>C	ENSP00000303540.4:p.Cys1741Arg	23195492	Myoclonic epilepsy of infancy
SCN1A	HGMD	2-166848605-T-C	Qualified - SCN1A databases support "de novo"	DM	ENST00000303395.8:c.5180A>G	ENSP00000303540.4:p.Asp1727Gly	23195492	Myoclonic epilepsy of infancy
SCN1A	HGMD	2-166848609-A-G	Qualified - SCN1A databases support "de novo"	DM	ENST00000303395.8:c.5176T>C	ENSP00000303540.4:p.Trp1726Arg	17347258	Myoclonic epilepsy of infancy
SCN1A	HGMD	2-166848612-C-A	Qualified - SCN1A databases support "de novo"	DM	ENST00000303395.8:c.5173G>T	ENSP00000303540.4:p.Gly1725Cys	18930999	Dravet syndrome
SCN1A	HGMD	2-166848621-T-C	Qualified - SCN1A databases support "de novo"	DM	ENST00000303395.8:c.5164A>G	ENSP00000303540.4:p.Thr1722Ala	26438699	Dravet syndrome
SCN1A	HGMD	2-166848623-G-C	Qualified - SCN1A databases support "de novo"	DM	ENST00000303395.8:c.5162C>G	ENSP00000303540.4:p.Thr1721Arg	17347258	Myoclonic epilepsy of infancy
SCN1A	HGMD	2-166848635-A-G	Qualified - SCN1A databases support "de novo"	DM	ENST00000303395.8:c.5150T>C	ENSP00000303540.4:p.Leu1717Pro	23762420	Dravet syndrome
SCN1A	HGMD	2-166848639-A-G	Qualified - SCN1A databases support "de novo"	DM	ENST00000303395.8:c.5146T>C	ENSP00000303540.4:p.Cys1716Arg	17561957	Myoclonic epilepsy of infancy
SCN1A	HGMD	2-166848644-A-C	Qualified - SCN1A databases support "de novo"	DM	ENST00000303395.8:c.5141T>G	ENSP00000303540.4:p.Met1714Arg	17054684	Myoclonic epilepsy of infancy
SCN1A	HGMD	2-166848704-T-C	Qualified - SCN1A databases support "de novo"	DM	ENST00000303395.8:c.5081A>G	ENSP00000303540.4:p.Tyr1694Cys	14738421	Myoclonic epilepsy of infancy
SCN1A	HGMD	2-166848710-A-G	Qualified - SCN1A databases support "de novo"	DM	ENST00000303395.8:c.5075T>C	ENSP00000303540.4:p.Phe1692Ser	14738421	Myoclonic epilepsy of infancy
SCN1A	HGMD	2-166848731-G-T	Qualified - SCN1A databases support "de novo"	DM	ENST00000303395.8:c.5054C>A	ENSP00000303540.4:p.Ala1685Asp	12566275	Myoclonic epilepsy of infancy
SCN1A	HGMD	2-166848756-G-A	Qualified - SCN1A databases support "de novo"	DM	ENST00000303395.8:c.5029C>T	ENSP00000303540.4:p.Leu1677Phe	18930999	Dravet syndrome
SCN1A	HGMD	2-166848761-A-C	Qualified - SCN1A databases support "de novo"	DM	ENST00000303395.8:c.5024T>G	ENSP00000303540.4:p.Leu1675Arg	18930999	Dravet syndrome
SCN1A	HGMD	2-166848765-C-G	Qualified - SCN1A databases support "de novo"	DM	ENST00000303395.8:c.5020G>C	ENSP00000303540.4:p.Gly1674Arg	12083760	Myoclonic epilepsy of infancy
SCN1A	HGMD	2-166848803-A-G	Qualified - SCN1A databases support "de novo"	DM	ENST00000303395.8:c.4982T>C	ENSP00000303540.4:p.Phe1661Ser	12754708	Myoclonic epilepsy of infancy
SCN1A	HGMD	2-166848812-G-C	Qualified - SCN1A databases support "de novo"	DM	ENST00000303395.8:c.4973C>G	ENSP00000303540.4:p.Thr1658Arg	17561957	Myoclonic epilepsy of infancy
SCN1A	HGMD	2-166848815-C-T	Qualified - SCN1A databases support "de novo"	DM	ENST00000303395.8:c.4970G>A	ENSP00000303540.4:p.Arg1657His	17347258	Cryptogenic focal epilepsy
SCN1A	HGMD	2-166848851-C-T	Qualified - SCN1A databases support "de novo"	DM	ENST00000303395.8:c.4934G>A	ENSP00000303540.4:p.Arg1645Gln	17347258	Myoclonic epilepsy of infancy
SCN1A	HGMD	2-166848872-A-T	Qualified - SCN1A databases support "de novo"	DM	ENST00000303395.8:c.4913T>A	ENSP00000303540.4:p.Ile1638Asn	23195492	Myoclonic epilepsy of infancy
SCN1A	HGMD	2-166848878-C-T	Qualified - SCN1A databases support "de novo"	DM	ENST00000303395.8:c.4907G>A	ENSP00000303540.4:p.Arg1636Gln	17347258	Lennox-Gastaut syndrome
SCN1A	HGMD	2-166850685-T-C	Qualified - SCN1A databases support "de novo"	DM	ENST00000303395.8:c.4823A>G	ENSP00000303540.4:p.Asp1608Gly	23195492	Myoclonic epilepsy of infancy
SCN1A	HGMD	2-166850686-C-A	Qualified - SCN1A databases support "de novo"	DM	ENST00000303395.8:c.4822G>T	ENSP00000303540.4:p.Asp1608Tyr	17561957	Myoclonic epilepsy of infancy
SCN1A	HGMD	2-166850721-C-A	Qualified - SCN1A databases support "de novo"	DM	ENST00000303395.8:c.4787G>T	ENSP00000303540.4:p.Arg1596Leu	18930999	Dravet syndrome
SCN1A	HGMD	2-166850746-A-G	Qualified - SCN1A databases support "de novo"	DM	ENST00000303395.8:c.4762T>C	ENSP00000303540.4:p.Cys1588Arg	17561957	Myoclonic epilepsy of infancy
SCN1A	HGMD	2-166850751-C-T	Qualified - SCN1A databases support "de novo"	DM	ENST00000303395.8:c.4757G>A	ENSP00000303540.4:p.Gly1586Glu	18930999	Dravet syndrome
SCN1A	HGMD	2-166850844-A-C	Qualified - SCN1A databases support "de novo"	DM	ENST00000303395.8:c.4664T>G	ENSP00000303540.4:p.Met1555Arg	23195492	Myoclonic epilepsy of infancy
SCN1A	HGMD	2-166850875-T-C	Qualified - SCN1A databases support "de novo"	DM	ENST00000303395.8:c.4633A>G	ENSP00000303540.4:p.Ile1545Val	17347258	Myoclonic epilepsy of infancy
SCN1A	HGMD	2-166850877-T-G	Qualified - SCN1A databases support "de novo"	DM	ENST00000303395.8:c.4631A>C	ENSP00000303540.4:p.Asp1544Ala	18930999	Dravet syndrome
SCN1A	HGMD	2-166852597-C-T	Qualified - SCN1A databases support "de novo"	DM	ENST00000303395.8:c.4507G>A	ENSP00000303540.4:p.Glu1503Lys	19783390	Myoclonic epilepsy of infancy
SCN1A	HGMD	2-166854571-T-C	Qualified - SCN1A databases support "de novo"	DM	ENST00000303395.8:c.4453A>G	ENSP00000303540.4:p.Asn1485Asp	23708187	Dravet syndrome
SCN1A	HGMD	2-166854585-C-A	Qualified - SCN1A databases support "de novo"	DM	ENST00000303395.8:c.4439G>T	ENSP00000303540.4:p.Gly1480Val	17347258	Myoclonic-astatic epilepsy
SCN1A	HGMD	2-166854600-A-G	Qualified - SCN1A databases support "de novo"	DM	ENST00000303395.8:c.4424T>C	ENSP00000303540.4:p.Leu1475Ser	17054684	Myoclonic epilepsy of infancy
SCN1A	HGMD	2-166854609-A-G	Qualified - SCN1A databases support "de novo"	DM	ENST00000303395.8:c.4415T>C	ENSP00000303540.4:p.Phe1472Ser	23195492	Myoclonic epilepsy borderline
SCN1A	HGMD	2-166854616-C-A	Qualified - SCN1A databases support "de novo"	DM	ENST00000303395.8:c.4408G>T	ENSP00000303540.4:p.Gly1470Trp	17561957	Myoclonic epilepsy of infancy
SCN1A	HGMD	2-166854636-A-G	Qualified - SCN1A databases support "de novo"	DM	ENST00000303395.8:c.4388T>C	ENSP00000303540.4:p.Phe1463Ser	12821740	Myoclonic epilepsy of infancy
SCN1A	HGMD	2-166854637-A-G	Qualified - SCN1A databases support "de novo"	DM	ENST00000303395.8:c.4387T>C	ENSP00000303540.4:p.Phe1463Leu	21844054	Dravet syndrome
SCN1A	HGMD	2-166854643-G-T	Qualified - SCN1A databases support "de novo"	DM	ENST00000303395.8:c.4381C>A	ENSP00000303540.4:p.Leu1461Ile	12821740	Myoclonic epilepsy of infancy
SCN1A	HGMD	2-166854672-G-A	Qualified - SCN1A databases support "de novo"	DM	ENST00000303395.8:c.4352C>T	ENSP00000303540.4:p.Pro1451Leu	17054684	Myoclonic epilepsy of infancy
SCN1A	HGMD	2-166854675-T-C	Qualified - SCN1A databases support "de novo"	DM	ENST00000303395.8:c.4349A>G	ENSP00000303540.4:p.Gln1450Arg	12083760	Myoclonic epilepsy of infancy
SCN1A	HGMD	2-166854675-T-G	Qualified - SCN1A databases support "de novo"	DM	ENST00000303395.8:c.4349A>C	ENSP00000303540.4:p.Gln1450Pro	21488261	Generalized epilepsy with febrile seizures plus
SCN1A	HGMD	2-166854676-G-T	Qualified - SCN1A databases support "de novo"	DM	ENST00000303395.8:c.4348C>A	ENSP00000303540.4:p.Gln1450Lys	19589774	Dravet syndrome
SCN1A	HGMD	2-166856250-C-G	Qualified - SCN1A databases support "de novo"	DM	ENST00000303395.8:c.4321G>C	ENSP00000303540.4:p.Ala1441Pro	17347258	Myoclonic epilepsy of infancy
SCN1A	HGMD	2-166856252-G-T	Qualified - SCN1A databases support "de novo"	DM	ENST00000303395.8:c.4319C>A	ENSP00000303540.4:p.Ala1440Glu	23808377	Dravet syndrome
SCN1A	HGMD	2-166856260-T-C	Qualified - SCN1A databases support "de novo"	DM	ENST00000303395.8:c.4311A>G	ENSP00000303540.4:p.Ile1437Met	18930999	Dravet syndrome
SCN1A	HGMD	2-166856271-A-G	Qualified - SCN1A databases support "de novo"	DM	ENST00000303395.8:c.4300T>C	ENSP00000303540.4:p.Trp1434Arg	12083760	Myoclonic epilepsy of infancy
SCN1A	HGMD	2-166856273-C-T	Qualified - SCN1A databases support "de novo"	DM	ENST00000303395.8:c.4298G>A	ENSP00000303540.4:p.Gly1433Glu	18554359	Myoclonic epilepsy of infancy
SCN1A	HGMD	2-166856274-C-T	Qualified - SCN1A databases support "de novo"	DM	ENST00000303395.8:c.4297G>A	ENSP00000303540.4:p.Gly1433Arg	20729507	Dravet syndrome
SCN1A	HGMD	2-166858986-T-G	Qualified - SCN1A databases support "de novo"	DM	ENST00000303395.8:c.4280A>C	ENSP00000303540.4:p.Gln1427Pro	23195492	Myoclonic epilepsy of infancy
SCN1A	HGMD	2-166858989-A-C	Qualified - SCN1A databases support "de novo"	DM	ENST00000303395.8:c.4277T>G	ENSP00000303540.4:p.Leu1426Arg	17054684	Myoclonic epilepsy of infancy
SCN1A	HGMD	2-166859001-T-C	Qualified - SCN1A databases support "de novo"	DM	ENST00000303395.8:c.4265A>G	ENSP00000303540.4:p.Tyr1422Cys	17054684	Myoclonic epilepsy of infancy
SCN1A	HGMD	2-166859019-T-C	Qualified - SCN1A databases support "de novo"	DM	ENST00000303395.8:c.4247A>G	ENSP00000303540.4:p.Asp1416Gly	18930999	Dravet syndrome
SCN1A	HGMD	2-166859026-T-A	Qualified - SCN1A databases support "de novo"	DM	ENST00000303395.8:c.4240A>T	ENSP00000303540.4:p.Asn1414Tyr	17561957	Myoclonic epilepsy of infancy
SCN1A	HGMD	2-166859080-A-C	Qualified - SCN1A databases support "de novo"	DM	ENST00000303395.8:c.4186T>G	ENSP00000303540.4:p.Cys1396Gly	17347258	Myoclonic epilepsy of infancy
SCN1A	HGMD	2-166859083-C-A	Qualified - SCN1A databases support "de novo"	DM	ENST00000303395.8:c.4183G>T	ENSP00000303540.4:p.Asp1395Tyr	21114141	Myoclonic epilepsy of infancy
SCN1A	HGMD	2-166859088-T-G	Qualified - SCN1A databases support "de novo"	DM	ENST00000303395.8:c.4178A>C	ENSP00000303540.4:p.His1393Pro	17129991	Myoclonic epilepsy of infancy
SCN1A	HGMD	2-166859098-C-T	Qualified - SCN1A databases support "de novo"	DM	ENST00000303395.8:c.4168G>A	ENSP00000303540.4:p.Val1390Met	12083760	Myoclonic epilepsy of infancy
SCN1A	HGMD	2-166859140-A-G	Qualified - SCN1A databases support "de novo"	DM	ENST00000303395.8:c.4126T>C	ENSP00000303540.4:p.Cys1376Arg	23195492	Intractable epilepsy
SCN1A	HGMD	2-166859193-C-G	Qualified - SCN1A databases support "de novo"	DM	ENST00000303395.8:c.4073G>C	ENSP00000303540.4:p.Trp1358Ser	18413471	Myoclonic epilepsy of infancy
SCN1A	HGMD	2-166859233-G-A	Qualified - SCN1A databases support "de novo"	DM	ENST00000303395.8:c.4033C>T	ENSP00000303540.4:p.Pro1345Ser	23708187	Epileptic encephalopathy early onset
SCN1A	HGMD	2-166859250-G-A	Qualified - SCN1A databases support "de novo"	DM	ENST00000303395.8:c.4016C>T	ENSP00000303540.4:p.Ala1339Val	23195492	Myoclonic epilepsy of infancy
SCN1A	HGMD	2-166859263-C-T	Qualified - SCN1A databases support "de novo"	DM	ENST00000303395.8:c.4003G>A	ENSP00000303540.4:p.Val1335Met	18413471	Myoclonic epilepsy of infancy
SCN1A	HGMD	2-166866249-A-G	Qualified - SCN1A databases support "de novo"	DM	ENST00000303395.8:c.3982T>C	ENSP00000303540.4:p.Ser1328Pro	18930999	Dravet syndrome
SCN1A	HGMD	2-166866254-G-A	Qualified - SCN1A databases support "de novo"	DM	ENST00000303395.8:c.3977C>T	ENSP00000303540.4:p.Ala1326Val	23708187	Epilepsy-aphasia
SCN1A	HGMD	2-166866254-G-T	Qualified - SCN1A databases support "de novo"	DM	ENST00000303395.8:c.3977C>A	ENSP00000303540.4:p.Ala1326Asp	19763161	Dravet syndrome
SCN1A	HGMD	2-166866255-C-G	Qualified - SCN1A databases support "de novo"	DM	ENST00000303395.8:c.3976G>C	ENSP00000303540.4:p.Ala1326Pro	14504318	Myoclonic epilepsy of infancy
SCN1A	HGMD	2-166866257-C-G	Qualified - SCN1A databases support "de novo"	DM	ENST00000303395.8:c.3974G>C	ENSP00000303540.4:p.Arg1325Thr	23195492	Intractable epilepsy
SCN1A	HGMD	2-166866263-G-C	Qualified - SCN1A databases support "de novo"	DM	ENST00000303395.8:c.3968C>G	ENSP00000303540.4:p.Pro1323Arg	21868258	Dravet syndrome
SCN1A	HGMD	2-166866278-A-C	Qualified - SCN1A databases support "de novo"	DM	ENST00000303395.8:c.3953T>G	ENSP00000303540.4:p.Leu1318Arg	22147323	Myoclonic epilepsy of infancy
SCN1A	HGMD	2-166866283-C-A	Qualified - SCN1A databases support "de novo"	DM	ENST00000303395.8:c.3948G>T	ENSP00000303540.4:p.Arg1316Ser	18930999	Dravet syndrome
SCN1A	HGMD	2-166866285-T-A	Qualified - SCN1A databases support "de novo"	DM	ENST00000303395.8:c.3946A>T	ENSP00000303540.4:p.Arg1316Trp	21868258	Dravet syndrome
SCN1A	HGMD	2-166868638-A-G	Qualified - SCN1A databases support "de novo"	DM	ENST00000303395.8:c.3860T>C	ENSP00000303540.4:p.Leu1287Pro	20431604	Dravet syndrome
SCN1A	HGMD	2-166868647-C-G	Qualified - SCN1A databases support "de novo"	DM	ENST00000303395.8:c.3851G>C	ENSP00000303540.4:p.Trp1284Ser	18930999	Dravet syndrome
SCN1A	HGMD	2-166868704-A-G	Qualified - SCN1A databases support "de novo"	DM	ENST00000303395.8:c.3794T>C	ENSP00000303540.4:p.Leu1265Pro	12083760	Myoclonic epilepsy of infancy
SCN1A	HGMD	2-166868709-G-C	Qualified - SCN1A databases support "de novo"	DM	ENST00000303395.8:c.3789C>G	ENSP00000303540.4:p.Phe1263Leu	12566275	Myoclonic epilepsy of infancy
SCN1A	HGMD	2-166868720-T-G	Qualified - SCN1A databases support "de novo"	DM	ENST00000303395.8:c.3778A>C	ENSP00000303540.4:p.Thr1260Pro	20431604	Dravet syndrome
SCN1A	HGMD	2-166868734-G-T	Qualified - SCN1A databases support "de novo"	DM	ENST00000303395.8:c.3764C>A	ENSP00000303540.4:p.Ala1255Asp	18930999	Dravet syndrome
SCN1A	HGMD	2-166868764-C-T	Qualified - SCN1A databases support "de novo"	DM	ENST00000303395.8:c.3734G>A	ENSP00000303540.4:p.Arg1245Gln	17054684	Myoclonic epilepsy of infancy
SCN1A	HGMD	2-166868782-T-C	Qualified - SCN1A databases support "de novo"	DM	ENST00000303395.8:c.3716A>G	ENSP00000303540.4:p.Asp1239Gly	18930999	Dravet syndrome
SCN1A	HGMD	2-166868783-C-A	Qualified - SCN1A databases support "de novo"	DM	ENST00000303395.8:c.3715G>T	ENSP00000303540.4:p.Asp1239Tyr	18930999	Dravet syndrome
SCN1A	HGMD	2-166870262-C-G	Qualified - SCN1A databases support "de novo"	DM	ENST00000303395.8:c.3697G>C	ENSP00000303540.4:p.Gly1233Arg	12821740	Myoclonic epilepsy of infancy
SCN1A	HGMD	2-166870266-A-T	Qualified - SCN1A databases support "de novo"	DM	ENST00000303395.8:c.3693T>A	ENSP00000303540.4:p.Ser1231Arg	12566275	Myoclonic epilepsy of infancy
SCN1A	HGMD	2-166870267-C-G	Qualified - SCN1A databases support "de novo"	DM	ENST00000303395.8:c.3692G>C	ENSP00000303540.4:p.Ser1231Thr	16458823	Myoclonic epilepsy of infancy
SCN1A	HGMD	2-166870330-G-T	Qualified - SCN1A databases support "de novo"	DM	ENST00000303395.8:c.3629C>A	ENSP00000303540.4:p.Thr1210Lys	19350499	Myoclonic epilepsy of infancy
SCN1A	HGMD	2-166893028-A-G	Qualified - SCN1A databases support "de novo"	DM	ENST00000303395.8:c.2959T>C	ENSP00000303540.4:p.Phe987Leu	23195492	Myoclonic epilepsy of infancy
SCN1A	HGMD	2-166894288-C-G	Qualified - SCN1A databases support "de novo"	DM	ENST00000303395.8:c.2944G>C	ENSP00000303540.4:p.Val982Leu	19763161	Dravet syndrome
SCN1A	HGMD	2-166894304-C-T	Qualified - SCN1A databases support "de novo"	DM	ENST00000303395.8:c.2928G>A	ENSP00000303540.4:p.Met976Ile	19522081	Generalized epilepsy with febrile seizures plus
SCN1A	HGMD	2-166894314-A-T	Qualified - SCN1A databases support "de novo"	DM	ENST00000303395.8:c.2918T>A	ENSP00000303540.4:p.Met973Lys	18930999	Dravet syndrome
SCN1A	HGMD	2-166894378-A-G	Qualified - SCN1A databases support "de novo"	DM	ENST00000303395.8:c.2854T>C	ENSP00000303540.4:p.Trp952Arg	21868258	Dravet syndrome
SCN1A	HGMD	2-166894386-C-G	Qualified - SCN1A databases support "de novo"	DM	ENST00000303395.8:c.2846G>C	ENSP00000303540.4:p.Cys949Ser	18930999	Dravet syndrome
SCN1A	HGMD	2-166894386-C-T	Qualified - SCN1A databases support "de novo"	DM	ENST00000303395.8:c.2846G>A	ENSP00000303540.4:p.Cys949Tyr	18930999	Dravet syndrome
SCN1A	HGMD	2-166894401-A-T	Qualified - SCN1A databases support "de novo"	DM	ENST00000303395.8:c.2831T>A	ENSP00000303540.4:p.Val944Glu	17347258	Myoclonic epilepsy of infancy
SCN1A	HGMD	2-166894425-T-A	Qualified - SCN1A databases support "de novo"	DM	ENST00000303395.8:c.2807A>T	ENSP00000303540.4:p.Asp936Val	23485646	Dravet syndrome
SCN1A	HGMD	2-166894430-C-T	Qualified - SCN1A databases support "de novo"	DM	ENST00000303395.8:c.2802G>A	ENSP00000303540.4:p.Met934Ile	14738421	Myoclonic epilepsy of infancy
SCN1A	HGMD	2-166894536-A-G	Qualified - SCN1A databases support "de novo"	DM	ENST00000303395.8:c.2696T>C	ENSP00000303540.4:p.Ile899Thr	19522081	Generalized epilepsy with febrile seizures plus
SCN1A	HGMD	2-166894546-C-G	Qualified - SCN1A databases support "de novo"	DM	ENST00000303395.8:c.2686G>C	ENSP00000303540.4:p.Val896Leu	18930999	Dravet syndrome
SCN1A	HGMD	2-166895965-C-T	Qualified - SCN1A databases support "de novo"	DM	ENST00000303395.8:c.2557G>A	ENSP00000303540.4:p.Glu853Lys	17054684	Myoclonic epilepsy of infancy
SCN1A	HGMD	2-166895993-G-C	Qualified - SCN1A databases support "de novo"	DM	ENST00000303395.8:c.2529C>G	ENSP00000303540.4:p.Ser843Arg	18930999	Dravet syndrome
SCN1A	HGMD	2-166895995-T-G	Qualified - SCN1A databases support "de novo"	DM	ENST00000303395.8:c.2527A>C	ENSP00000303540.4:p.Ser843Arg	18930999	Dravet syndrome
SCN1A	HGMD	2-166900201-T-C	Qualified - SCN1A databases support "de novo"	DM	ENST00000303395.8:c.2021A>G	ENSP00000303540.4:p.Asp674Gly	17347258	Myoclonic epilepsy of infancy
SCN1A	HGMD	2-166901553-C-A	Qualified - SCN1A databases support "de novo"	DM	ENST00000303395.8:c.1662G>T	ENSP00000303540.4:p.Gln554His	23808377	Dravet syndrome
SCN1A	HGMD	2-166901554-T-C	Qualified - SCN1A databases support "de novo"	DM	ENST00000303395.8:c.1661A>G	ENSP00000303540.4:p.Gln554Arg	26339958	Dravet syndrome
SCN1A	HGMD	2-166901641-G-A	Qualified - SCN1A databases support "de novo"	DM	ENST00000303395.8:c.1574C>T	ENSP00000303540.4:p.Ser525Phe	18930999	Dravet syndrome
SCN1A	ClinVar & HGMD	2-166903380-T-C	Qualified - SCN1A databases support "de novo"	Pathogenic	ENST00000303395.8:c.1277A>G	ENSP00000303540.4:p.Tyr426Cys	NO ID	Dravet syndrome
SCN1A	HGMD	2-166903393-C-A	Qualified - SCN1A databases support "de novo"	DM	ENST00000303395.8:c.1264G>T	ENSP00000303540.4:p.Val422Leu	24776920	Epileptic encephalopathy infantile
SCN1A	HGMD	2-166903470-C-T	Qualified - SCN1A databases support "de novo"	DM	ENST00000303395.8:c.1187G>A	ENSP00000303540.4:p.Gly396Glu	21868258	Dravet syndrome
SCN1A	ClinVar & HGMD	2-166903480-G-A	Qualified - SCN1A databases support "de novo"	Pathogenic	ENST00000303395.8:c.1177C>T	ENSP00000303540.4:p.Arg393Cys	19585586	Severe myoclonic epilepsy in infancy
SCN1A	HGMD	2-166903486-T-G	Qualified - SCN1A databases support "de novo"	DM	ENST00000303395.8:c.1171A>C	ENSP00000303540.4:p.Thr391Pro	21844054	Dravet syndrome
SCN1A	HGMD	2-166904153-T-C	Qualified - SCN1A databases support "de novo"	DM	ENST00000303395.8:c.1154A>G	ENSP00000303540.4:p.Glu385Gly	22071555	Dravet syndrome
SCN1A	ClinVar	2-166904213-A-G	Qualified - SCN1A databases support "de novo"	Pathogenic	ENST00000303395.8:c.1094T>C	ENSP00000303540.4:p.Phe365Ser	NO ID	not provided
SCN1A	HGMD	2-166904237-T-A	Qualified - SCN1A databases support "de novo"	DM	ENST00000303395.8:c.1070A>T	ENSP00000303540.4:p.Asn357Ile	18930999	Dravet syndrome
SCN1A	HGMD	2-166904243-C-T	Qualified - SCN1A databases support "de novo"	DM	ENST00000303395.8:c.1064G>A	ENSP00000303540.4:p.Gly355Asp	18930999	Dravet syndrome
SCN1A	HGMD	2-166905450-T-C	Qualified - SCN1A databases support "de novo"	DM	ENST00000303395.8:c.974A>G	ENSP00000303540.4:p.Tyr325Cys	23821540	Myoclonic epilepsy of infancy
SCN1A	ClinVar & HGMD	2-166908351-G-A	Qualified - SCN1A databases support "de novo"	Pathogenic	ENST00000303395.8:c.842C>T	ENSP00000303540.4:p.Pro281Leu	NO ID	Dravet syndrome
SCN1A	HGMD	2-166908353-C-A	Qualified - SCN1A databases support "de novo"	DM	ENST00000303395.8:c.840G>T	ENSP00000303540.4:p.Trp280Cys	18639757	Myoclonic epilepsy of infancy
SCN1A	HGMD	2-166908364-A-G	Qualified - SCN1A databases support "de novo"	DM	ENST00000303395.8:c.829T>C	ENSP00000303540.4:p.Cys277Arg	18930999	Dravet syndrome
SCN1A	ClinVar & HGMD	2-166908474-A-G	Qualified - SCN1A databases support "de novo"	Likely pathogenic	ENST00000303395.8:c.719T>C	ENSP00000303540.4:p.Leu240Pro	25741868	Generalized epilepsy with febrile seizures plus
SCN1A	ClinVar & HGMD	2-166909379-G-A	Qualified - SCN1A databases support "de novo"	Pathogenic	ENST00000303395.8:c.677C>T	ENSP00000303540.4:p.Thr226Met	NO ID	Severe myoclonic epilepsy in infancy
SCN1A	ClinVar & HGMD	2-166909379-G-C	Qualified - SCN1A databases support "de novo"	Pathogenic	ENST00000303395.8:c.677C>G	ENSP00000303540.4:p.Thr226Arg	NO ID	Myoclonic epilepsy of infancy
SCN1A	HGMD	2-166909388-G-T	Qualified - SCN1A databases support "de novo"	DM	ENST00000303395.8:c.668C>A	ENSP00000303540.4:p.Ala223Glu	18930999	Dravet syndrome
SCN1A	HGMD	2-166911221-C-T	Qualified - SCN1A databases support "de novo"	DM	ENST00000303395.8:c.529G>A	ENSP00000303540.4:p.Gly177Arg	18076640	Dravet syndrome
SCN1A	HGMD	2-166911226-G-A	Qualified - SCN1A databases support "de novo"	DM	ENST00000303395.8:c.524C>T	ENSP00000303540.4:p.Ala175Val	18930999	Dravet syndrome
SCN1A	HGMD	2-166911238-A-C	Qualified - SCN1A databases support "de novo"	DM	ENST00000303395.8:c.512T>G	ENSP00000303540.4:p.Ile171Arg	18930999	Dravet syndrome
SCN1A	HGMD	2-166912981-A-G	Qualified - SCN1A databases support "de novo"	DM	ENST00000303395.8:c.413T>C	ENSP00000303540.4:p.Ile138Thr	23808377	Dravet syndrome
SCN1A	ClinVar & HGMD	2-166915161-C-T	Qualified - SCN1A databases support "de novo"	Pathogenic	ENST00000303395.8:c.302G>A	ENSP00000303540.4:p.Arg101Gln	23757202	Severe myoclonic epilepsy in infancy
SCN1A	HGMD	2-166929889-G-T	Qualified - SCN1A databases support "de novo"	DM	ENST00000303395.8:c.243C>A	ENSP00000303540.4:p.Asp81Glu	26169758	Dravet syndrome
SCN1A	HGMD	2-166848521-T-C	Qualified - Parental mosaic in literature	DM	ENST00000303395.8:c.5264A>G	ENSP00000303540.4:p.Asp1755Gly	26252084	Dravet syndrome
SCN1A	HGMD	2-166848017-T-C	Qualified - Mosaic in literature	DM	ENST00000303395.8:c.5768A>G	ENSP00000303540.4:p.Gln1923Arg	22151702	Partial epilepsy with febrile seizures plus
SCN1A	ClinVar & HGMD	2-166915126-G-T	Qualified - Mosaic in literature	Pathogenic	ENST00000303395.8:c.337C>A	ENSP00000303540.4:p.Pro113Thr	26096185	Severe myoclonic epilepsy in infancy
SCN1A	ClinVar & HGMD	2-166915194-A-G	Qualified - Mosaic in literature	Pathogenic	ENST00000303395.8:c.269T>C	ENSP00000303540.4:p.Phe90Ser	26096185	Severe myoclonic epilepsy in infancy
SCN1A	ClinVar	2-166929950-A-G	Qualified - Mosaic in literature	Likely pathogenic	ENST00000303395.8:c.182T>C	ENSP00000303540.4:p.Leu61Pro	NO ID	not provided
SCN1A	HGMD	2-166848006-T-C	Qualified - De novo in literature	DM	ENST00000303395.8:c.5779A>G	ENSP00000303540.4:p.Arg1927Gly	NO ID	Generalized epilepsy with febrile seizures plus
SCN1A	HGMD	2-166848189-C-A	Qualified - De novo in literature	DM	ENST00000303395.8:c.5596G>T	ENSP00000303540.4:p.Asp1866Tyr	15525788	Generalized epilepsy with febrile seizures plus
SCN1A	HGMD	2-166848555-T-C	Qualified - De novo in literature	DM	ENST00000303395.8:c.5230A>G	ENSP00000303540.4:p.Asn1744Asp	22944210	Generalized epilepsy with febrile seizures plus
SCN1A	HGMD	2-166848563-C-G	Qualified - De novo in literature	DM	ENST00000303395.8:c.5222G>C	ENSP00000303540.4:p.Cys1741Ser	23934111	Lennox-Gastaut syndrome
SCN1A	HGMD	2-166848851-C-G	Qualified - De novo in literature	DM	ENST00000303395.8:c.4934G>C	ENSP00000303540.4:p.Arg1645Pro	26096185	Dravet syndrome
SCN1A	HGMD	2-166848859-C-G	Qualified - De novo in literature	DM	ENST00000303395.8:c.4926G>C	ENSP00000303540.4:p.Arg1642Ser	23195492	Myoclonic epilepsy of infancy
SCN1A	HGMD	2-166850718-T-C	Qualified - De novo in literature	DM	ENST00000303395.8:c.4790A>G	ENSP00000303540.4:p.His1597Arg	22944210	Generalized epilepsy with febrile seizures plus
SCN1A	HGMD	2-166850742-A-C	Qualified - De novo in literature	DM	ENST00000303395.8:c.4766T>G	ENSP00000303540.4:p.Val1589Gly	26096185	Dravet syndrome
SCN1A	HGMD	2-166852557-G-C	Qualified - De novo in literature	DM	ENST00000303395.8:c.4547C>G	ENSP00000303540.4:p.Ser1516Trp	26096185	Dravet syndrome
SCN1A	HGMD	2-166852575-G-T	Qualified - De novo in literature	DM	ENST00000303395.8:c.4529C>A	ENSP00000303540.4:p.Ala1510Glu	23934111	Lennox-Gastaut syndrome
SCN1A	HGMD	2-166854612-G-A	Qualified - De novo in literature	DM	ENST00000303395.8:c.4412C>T	ENSP00000303540.4:p.Ser1471Phe	26096185	Dravet syndrome
SCN1A	HGMD	2-166859055-T-G	Qualified - De novo in literature	DM	ENST00000303395.8:c.4211A>C	ENSP00000303540.4:p.Glu1404Ala	17129991	Myoclonic epilepsy of infancy
SCN1A	HGMD	2-166859222-C-T	Qualified - De novo in literature	DM	ENST00000303395.8:c.4044G>A	ENSP00000303540.4:p.Met1348Ile	26096185	Dravet syndrome
SCN1A	HGMD	2-166859253-T-G	Qualified - De novo in literature	DM	ENST00000303395.8:c.4013A>C	ENSP00000303540.4:p.Asn1338Thr	24901346	Dravet syndrome
SCN1A	HGMD	2-166868674-C-G	Qualified - De novo in literature	DM	ENST00000303395.8:c.3824G>C	ENSP00000303540.4:p.Gly1275Ala	23647072	Epileptic encephalopathy
SCN1A	HGMD	2-166868677-T-G	Qualified - De novo in literature	DM	ENST00000303395.8:c.3821A>C	ENSP00000303540.4:p.Tyr1274Ser	26096185	Dravet syndrome
SCN1A	HGMD	2-166868678-A-T	Qualified - De novo in literature	DM	ENST00000303395.8:c.3820T>A	ENSP00000303540.4:p.Tyr1274Asn	20682179	Generalized epilepsy with febrile seizures plus
SCN1A	HGMD	2-166868680-G-A	Qualified - De novo in literature	DM	ENST00000303395.8:c.3818C>T	ENSP00000303540.4:p.Ala1273Val	26096185	Dravet syndrome
SCN1A	HGMD	2-166868735-C-G	Qualified - De novo in literature	DM	ENST00000303395.8:c.3763G>C	ENSP00000303540.4:p.Ala1255Pro	26096185	Dravet syndrome
SCN1A	ClinVar & HGMD	2-166893031-G-A	Qualified - De novo in literature	Pathogenic	ENST00000303395.8:c.2956C>T	ENSP00000303540.4:p.Leu986Phe	11359211	Severe myoclonic epilepsy in infancy
SCN1A	ClinVar & HGMD	2-166894441-G-A	Qualified - De novo in literature	Likely pathogenic;Pathogenic	ENST00000303395.8:c.2791C>T	ENSP00000303540.4:p.Arg931Cys	NO ID	Severe myoclonic epilepsy in infancy
SCN1A	ClinVar & HGMD	2-166895938-G-C	Qualified - De novo in literature	Pathogenic	ENST00000303395.8:c.2584C>G	ENSP00000303540.4:p.Arg862Gly	21753172	Severe myoclonic epilepsy in infancy
SCN1A	HGMD	2-166903423-A-T	Qualified - De novo in literature	DM	ENST00000303395.8:c.1234T>A	ENSP00000303540.4:p.Phe412Ile	20682179	Generalized epilepsy with febrile seizures plus
SCN1A	HGMD	2-166904153-T-A	Qualified - De novo in literature	DM	ENST00000303395.8:c.1154A>T	ENSP00000303540.4:p.Glu385Val	26169758	Dravet syndrome
SCN1A	HGMD	2-166904256-A-G	Qualified - De novo in literature	DM	ENST00000303395.8:c.1051T>C	ENSP00000303540.4:p.Cys351Arg	26169758	Dravet syndrome
SCN1A	HGMD	2-166908327-T-A	Qualified - De novo in literature	DM	ENST00000303395.8:c.866A>T	ENSP00000303540.4:p.Glu289Val	22612257	Dravet syndrome
SCN1A	HGMD	2-166909397-A-T	Qualified - De novo in literature	DM	ENST00000303395.8:c.659T>A	ENSP00000303540.4:p.Val220Asp	26544041	Malignant migrating partial seizures in infancy
SCN1A	ClinVar	2-166929889-G-C	Qualified - De novo in literature	Likely pathogenic	ENST00000303395.8:c.243C>G	ENSP00000303540.4:p.Asp81Glu	NO ID	not provided
SCN1A	HGMD	2-166848005-C-G	Qualified - ClinVar "de novo"	DM	ENST00000303395.8:c.5780G>C	ENSP00000303540.4:p.Arg1927Thr	26096185	Dravet syndrome
SCN1A	HGMD	2-166848270-G-C	Qualified - ClinVar "de novo"	DM	ENST00000303395.8:c.5515C>G	ENSP00000303540.4:p.Leu1839Val	24168886	Dravet syndrome
SCN1A	HGMD	2-166848563-C-T	Qualified - ClinVar "de novo"	DM	ENST00000303395.8:c.5222G>A	ENSP00000303540.4:p.Cys1741Tyr	26096185	Dravet syndrome
SCN1A	HGMD	2-166848677-T-A	Qualified - ClinVar "de novo"	DM	ENST00000303395.8:c.5108A>T	ENSP00000303540.4:p.Asp1703Val	24168886	Dravet syndrome
SCN1A	HGMD	2-166848679-A-T	Qualified - ClinVar "de novo"	DM	ENST00000303395.8:c.5106T>A	ENSP00000303540.4:p.Asp1702Glu	24168886	Dravet syndrome
SCN1A	HGMD	2-166848722-C-A	Qualified - ClinVar "de novo"	DM	ENST00000303395.8:c.5063G>T	ENSP00000303540.4:p.Gly1688Val	26096185	Dravet syndrome
SCN1A	HGMD	2-166848771-T-G	Qualified - ClinVar "de novo"	DM	ENST00000303395.8:c.5014A>C	ENSP00000303540.4:p.Asn1672His	24168886	Dravet syndrome
SCN1A	HGMD	2-166859178-A-T	Qualified - ClinVar "de novo"	DM	ENST00000303395.8:c.4088T>A	ENSP00000303540.4:p.Ile1363Asn	24168886	Dravet syndrome
SCN1A	HGMD	2-166859180-G-C	Qualified - ClinVar "de novo"	DM	ENST00000303395.8:c.4086C>G	ENSP00000303540.4:p.Ser1362Arg	24168886	Dravet syndrome
SCN1A	HGMD	2-166868792-C-G	Qualified - ClinVar "de novo"	DM	ENST00000303395.8:c.3706G>C	ENSP00000303540.4:p.Ala1236Pro	24168886	Dravet syndrome
SCN1A	ClinVar & HGMD	2-166894296-C-T	Qualified - ClinVar "de novo"	Pathogenic	ENST00000303395.8:c.2936G>A	ENSP00000303540.4:p.Gly979Glu	26096185	Severe myoclonic epilepsy in infancy
SCN1A	ClinVar & HGMD	2-166894329-C-A	Qualified - ClinVar "de novo"	Pathogenic	ENST00000303395.8:c.2903G>T	ENSP00000303540.4:p.Cys968Phe	26096185	Severe myoclonic epilepsy in infancy
SCN1A	ClinVar & HGMD	2-166894353-A-C	Qualified - ClinVar "de novo"	Pathogenic	ENST00000303395.8:c.2879T>G	ENSP00000303540.4:p.Met960Arg	26096185	Severe myoclonic epilepsy in infancy
SCN1A	ClinVar & HGMD	2-166894356-C-T	Qualified - ClinVar "de novo"	Pathogenic	ENST00000303395.8:c.2876G>A	ENSP00000303540.4:p.Cys959Tyr	26096185	Severe myoclonic epilepsy in infancy
SCN1A	ClinVar & HGMD	2-166894378-A-C	Qualified - ClinVar "de novo"	Pathogenic	ENST00000303395.8:c.2854T>G	ENSP00000303540.4:p.Trp952Gly	26096185	Severe myoclonic epilepsy in infancy
SCN1A	ClinVar & HGMD	2-166894395-C-G	Qualified - ClinVar "de novo"	Pathogenic	ENST00000303395.8:c.2837G>C	ENSP00000303540.4:p.Arg946Pro	26096185	Severe myoclonic epilepsy in infancy
SCN1A	ClinVar & HGMD	2-166894396-G-A	Qualified - ClinVar "de novo"	Pathogenic	ENST00000303395.8:c.2836C>T	ENSP00000303540.4:p.Arg946Cys	14738421	Severe myoclonic epilepsy in infancy
SCN1A	ClinVar & HGMD	2-166894417-G-A	Qualified - ClinVar "de novo"	Pathogenic	ENST00000303395.8:c.2815C>T	ENSP00000303540.4:p.His939Tyr	26096185	Severe myoclonic epilepsy in infancy
SCN1A	ClinVar & HGMD	2-166894440-C-G	Qualified - ClinVar "de novo"	Likely pathogenic;Pathogenic	ENST00000303395.8:c.2792G>C	ENSP00000303540.4:p.Arg931Pro	26096185	Severe myoclonic epilepsy in infancy
SCN1A	ClinVar & HGMD	2-166894452-C-A	Qualified - ClinVar "de novo"	Pathogenic	ENST00000303395.8:c.2780G>T	ENSP00000303540.4:p.Cys927Phe	26096185	Severe myoclonic epilepsy in infancy
SCN1A	ClinVar & HGMD	2-166894504-G-T	Qualified - ClinVar "de novo"	Pathogenic	ENST00000303395.8:c.2728C>A	ENSP00000303540.4:p.Gln910Lys	26096185	Severe myoclonic epilepsy in infancy
SCN1A	ClinVar & HGMD	2-166894542-A-G	Qualified - ClinVar "de novo"	Pathogenic	ENST00000303395.8:c.2690T>C	ENSP00000303540.4:p.Leu897Ser	26096185	Severe myoclonic epilepsy in infancy
SCN1A	ClinVar & HGMD	2-166894617-G-T	Qualified - ClinVar "de novo"	Pathogenic	ENST00000303395.8:c.2615C>A	ENSP00000303540.4:p.Ser872Tyr	26096185	Severe myoclonic epilepsy in infancy
SCN1A	ClinVar & HGMD	2-166895934-A-C	Qualified - ClinVar "de novo"	Pathogenic	ENST00000303395.8:c.2588T>G	ENSP00000303540.4:p.Leu863Trp	26096185	Severe myoclonic epilepsy in infancy
SCN1A	ClinVar & HGMD	2-166895985-T-C	Qualified - ClinVar "de novo"	Pathogenic	ENST00000303395.8:c.2537A>G	ENSP00000303540.4:p.Glu846Gly	26096185	Severe myoclonic epilepsy in infancy
SCN1A	ClinVar & HGMD	2-166896043-A-C	Qualified - ClinVar "de novo"	Pathogenic	ENST00000303395.8:c.2479T>G	ENSP00000303540.4:p.Tyr827Asp	26096185	Severe myoclonic epilepsy in infancy
SCN1A	ClinVar & HGMD	2-166897803-T-C	Qualified - ClinVar "de novo"	Pathogenic	ENST00000303395.8:c.2353A>G	ENSP00000303540.4:p.Met785Val	26096185	Severe myoclonic epilepsy in infancy
SCN1A	ClinVar & HGMD	2-166897853-G-A	Qualified - ClinVar "de novo"	Pathogenic	ENST00000303395.8:c.2303C>T	ENSP00000303540.4:p.Pro768Leu	26096185	Severe myoclonic epilepsy in infancy
SCN1A	ClinVar & HGMD	2-166897895-C-A	Qualified - ClinVar "de novo"	Pathogenic	ENST00000303395.8:c.2261G>T	ENSP00000303540.4:p.Trp754Leu	26096185	Severe myoclonic epilepsy in infancy
SCN1A	ClinVar & HGMD	2-166897943-C-A	Qualified - ClinVar "de novo"	Pathogenic	ENST00000303395.8:c.2213G>T	ENSP00000303540.4:p.Trp738Leu	26096185	Severe myoclonic epilepsy in infancy
SCN1A	ClinVar & HGMD	2-166900252-G-A	Qualified - ClinVar "de novo"	Pathogenic	ENST00000303395.8:c.1970C>T	ENSP00000303540.4:p.Pro657Leu	26096185	Severe myoclonic epilepsy in infancy
SCN1A	ClinVar & HGMD	2-166900346-T-C	Qualified - ClinVar "de novo"	Pathogenic	ENST00000303395.8:c.1876A>G	ENSP00000303540.4:p.Ser626Gly	26096185	Severe myoclonic epilepsy in infancy
SCN1A	ClinVar & HGMD	2-166903392-A-G	Qualified - ClinVar "de novo"	Pathogenic	ENST00000303395.8:c.1265T>C	ENSP00000303540.4:p.Val422Ala	26096185	Severe myoclonic epilepsy in infancy
SCN1A	ClinVar & HGMD	2-166903398-G-A	Qualified - ClinVar "de novo"	Pathogenic	ENST00000303395.8:c.1259C>T	ENSP00000303540.4:p.Ala420Val	26096185	Severe myoclonic epilepsy in infancy
SCN1A	ClinVar & HGMD	2-166903458-A-T	Qualified - ClinVar "de novo"	Pathogenic	ENST00000303395.8:c.1199T>A	ENSP00000303540.4:p.Met400Lys	26096185	Severe myoclonic epilepsy in infancy
SCN1A	ClinVar	2-166903462-A-C	Qualified - ClinVar "de novo"	Pathogenic	ENST00000303395.8:c.1195T>G	ENSP00000303540.4:p.Tyr399Asp	NO ID	not provided
SCN1A	ClinVar & HGMD	2-166903479-C-T	Qualified - ClinVar "de novo"	Pathogenic	ENST00000303395.8:c.1178G>A	ENSP00000303540.4:p.Arg393His	12754708	Severe myoclonic epilepsy in infancy
SCN1A	ClinVar & HGMD	2-166904161-G-T	Qualified - ClinVar "de novo"	Pathogenic	ENST00000303395.8:c.1146C>A	ENSP00000303540.4:p.Asp382Glu	26096185	Severe myoclonic epilepsy in infancy
SCN1A	ClinVar & HGMD	2-166904171-A-T	Qualified - ClinVar "de novo"	Pathogenic	ENST00000303395.8:c.1136T>A	ENSP00000303540.4:p.Met379Lys	26096185	Severe myoclonic epilepsy in infancy
SCN1A	ClinVar	2-166904195-G-A	Qualified - ClinVar "de novo"	Likely pathogenic	ENST00000303395.8:c.1112C>T	ENSP00000303540.4:p.Ala371Val	NO ID	not provided
SCN1A	ClinVar & HGMD	2-166904235-G-A	Qualified - ClinVar "de novo"	Pathogenic	ENST00000303395.8:c.1072C>T	ENSP00000303540.4:p.Pro358Ser	26096185	Severe myoclonic epilepsy in infancy
SCN1A	ClinVar & HGMD	2-166904259-T-C	Qualified - ClinVar "de novo"	Pathogenic	ENST00000303395.8:c.1048A>G	ENSP00000303540.4:p.Met350Val	26096185	Severe myoclonic epilepsy in infancy
SCN1A	ClinVar & HGMD	2-166904274-A-G	Qualified - ClinVar "de novo"	Pathogenic	ENST00000303395.8:c.1033T>C	ENSP00000303540.4:p.Cys345Arg	26096185	Severe myoclonic epilepsy in infancy
SCN1A	ClinVar & HGMD	2-166905400-C-A	Qualified - ClinVar "de novo"	Pathogenic	ENST00000303395.8:c.1024G>T	ENSP00000303540.4:p.Ala342Ser	26096185	Severe myoclonic epilepsy in infancy
SCN1A	ClinVar & HGMD	2-166905417-C-T	Qualified - ClinVar "de novo"	Pathogenic	ENST00000303395.8:c.1007G>A	ENSP00000303540.4:p.Cys336Tyr	26096185	Severe myoclonic epilepsy in infancy
SCN1A	ClinVar & HGMD	2-166908355-A-G	Qualified - ClinVar "de novo"	Pathogenic	ENST00000303395.8:c.838T>C	ENSP00000303540.4:p.Trp280Arg	26096185	Severe myoclonic epilepsy in infancy
SCN1A	ClinVar & HGMD	2-166908367-T-G	Qualified - ClinVar "de novo"	Pathogenic	ENST00000303395.8:c.826A>C	ENSP00000303540.4:p.Lys276Gln	26096185	Severe myoclonic epilepsy in infancy
SCN1A	ClinVar & HGMD	2-166908416-G-T	Qualified - ClinVar "de novo"	Pathogenic	ENST00000303395.8:c.777C>A	ENSP00000303540.4:p.Ser259Arg	26096185	Severe myoclonic epilepsy in infancy
SCN1A	ClinVar & HGMD	2-166908424-A-G	Qualified - ClinVar "de novo"	Likely pathogenic;Pathogenic	ENST00000303395.8:c.769T>C	ENSP00000303540.4:p.Cys257Arg	26096185	Severe myoclonic epilepsy in infancy
SCN1A	ClinVar	2-166908445-C-T	Qualified - ClinVar "de novo"	Likely pathogenic	ENST00000303395.8:c.748G>A	ENSP00000303540.4:p.Val250Ile	NO ID	not provided
SCN1A	ClinVar	2-166908454-G-C	Qualified - ClinVar "de novo"	Pathogenic	ENST00000303395.8:c.739C>G	ENSP00000303540.4:p.Leu247Val	NO ID	not provided
SCN1A	ClinVar & HGMD	2-166908465-G-T	Qualified - ClinVar "de novo"	Pathogenic	ENST00000303395.8:c.728C>A	ENSP00000303540.4:p.Ser243Tyr	26096185	Severe myoclonic epilepsy in infancy
SCN1A	ClinVar & HGMD	2-166908478-C-T	Qualified - ClinVar "de novo"	Pathogenic	ENST00000303395.8:c.715G>A	ENSP00000303540.4:p.Ala239Thr	26096185	Severe myoclonic epilepsy in infancy
SCN1A	ClinVar & HGMD	2-166909376-A-C	Qualified - ClinVar "de novo"	Pathogenic	ENST00000303395.8:c.680T>G	ENSP00000303540.4:p.Ile227Ser	26096185	Severe myoclonic epilepsy in infancy
SCN1A	ClinVar & HGMD	2-166909381-C-G	Qualified - ClinVar "de novo"	Pathogenic	ENST00000303395.8:c.675G>C	ENSP00000303540.4:p.Lys225Asn	26096185	Severe myoclonic epilepsy in infancy
SCN1A	ClinVar	2-166909394-A-G	Qualified - ClinVar "de novo"	Pathogenic	ENST00000303395.8:c.662T>C	ENSP00000303540.4:p.Leu221Pro	NO ID	not provided
SCN1A	ClinVar & HGMD	2-166911220-C-A	Qualified - ClinVar "de novo"	Pathogenic	ENST00000303395.8:c.530G>T	ENSP00000303540.4:p.Gly177Val	26096185	Severe myoclonic epilepsy in infancy
SCN1A	ClinVar & HGMD	2-166912961-T-C	Qualified - ClinVar "de novo"	Pathogenic	ENST00000303395.8:c.433A>G	ENSP00000303540.4:p.Met145Val	26096185	Severe myoclonic epilepsy in infancy
SCN1A	ClinVar & HGMD	2-166915083-T-A	Qualified - ClinVar "de novo"	Pathogenic	ENST00000303395.8:c.380A>T	ENSP00000303540.4:p.His127Leu	26096185	Severe myoclonic epilepsy in infancy
SCN1A	ClinVar & HGMD	2-166915140-A-G	Qualified - ClinVar "de novo"	Pathogenic	ENST00000303395.8:c.323T>C	ENSP00000303540.4:p.Leu108Pro	26096185	Severe myoclonic epilepsy in infancy
SCN1A	ClinVar & HGMD	2-166915155-C-A	Qualified - ClinVar "de novo"	Pathogenic	ENST00000303395.8:c.308G>T	ENSP00000303540.4:p.Ser103Ile	26096185	Severe myoclonic epilepsy in infancy
SCN1A	ClinVar & HGMD	2-166915162-G-A	Qualified - ClinVar "de novo"	Pathogenic	ENST00000303395.8:c.301C>T	ENSP00000303540.4:p.Arg101Trp	26096185	Severe myoclonic epilepsy in infancy
SCN1A	ClinVar & HGMD	2-166915191-A-G	Qualified - ClinVar "de novo"	Pathogenic	ENST00000303395.8:c.272T>C	ENSP00000303540.4:p.Ile91Thr	26096185	Severe myoclonic epilepsy in infancy
SCN1A	ClinVar & HGMD	2-166930062-C-T	Qualified - ClinVar "de novo"	Pathogenic	ENST00000303395.8:c.70G>A	ENSP00000303540.4:p.Ala24Thr	26096185	Severe myoclonic epilepsy in infancy
SCN1A	HGMD	2-166847823-G-A	Not Qualified - Insufficient Evidence	DM	ENST00000303395.8:c.5962C>T	ENSP00000303540.4:p.Arg1988Trp	23708187	Epilepsy-aphasia with febrile seizures plus
SCN1A	HGMD	2-166847856-T-A	Not Qualified - Insufficient Evidence	DM	ENST00000303395.8:c.5929A>T	ENSP00000303540.4:p.Met1977Leu	22309220	Acute encephalopathy
SCN1A	HGMD	2-166848003-G-C	Not Qualified - Insufficient Evidence	DM	ENST00000303395.8:c.5782C>G	ENSP00000303540.4:p.Arg1928Gly	18413471	Myoclonic epilepsy of infancy
SCN1A	HGMD	2-166848020-A-G	Not Qualified - Insufficient Evidence	DM	ENST00000303395.8:c.5765T>C	ENSP00000303540.4:p.Ile1922Thr	17347258	Myoclonic epilepsy of infancy
SCN1A	HGMD	2-166848059-G-A	Not Qualified - Insufficient Evidence	DM	ENST00000303395.8:c.5726C>T	ENSP00000303540.4:p.Thr1909Ile	12083760	Myoclonic epilepsy of infancy
SCN1A	HGMD	2-166848128-C-T	Not Qualified - Insufficient Evidence	DM	ENST00000303395.8:c.5657G>A	ENSP00000303540.4:p.Arg1886Gln	23398550	Dravet syndrome
SCN1A	HGMD	2-166848144-C-T	Not Qualified - Insufficient Evidence	DM	ENST00000303395.8:c.5641G>A	ENSP00000303540.4:p.Glu1881Lys	22071555	Dravet syndrome
SCN1A	HGMD	2-166848204-G-A	Not Qualified - Insufficient Evidence	DM	ENST00000303395.8:c.5581C>T	ENSP00000303540.4:p.Arg1861Trp	23195492	Intractable epilepsy
SCN1A	HGMD	2-166848216-C-A	Not Qualified - Insufficient Evidence	DM	ENST00000303395.8:c.5569G>T	ENSP00000303540.4:p.Val1857Leu	15715999	Generalised epilepsy with febrile seizures plus 2
SCN1A	HGMD	2-166848230-A-G	Not Qualified - Insufficient Evidence	DM	ENST00000303395.8:c.5555T>C	ENSP00000303540.4:p.Met1852Thr	12919402	Generalized epilepsy with febrile seizures plus
SCN1A	HGMD	2-166848293-A-G	Not Qualified - Insufficient Evidence	DM	ENST00000303395.8:c.5492T>C	ENSP00000303540.4:p.Phe1831Ser	12566275	Myoclonic epilepsy of infancy
SCN1A	HGMD	2-166848363-A-G	Not Qualified - Insufficient Evidence	DM	ENST00000303395.8:c.5422T>C	ENSP00000303540.4:p.Phe1808Leu	12566275	Myoclonic epilepsy of infancy
SCN1A	HGMD	2-166848402-C-T	Not Qualified - Insufficient Evidence	DM	ENST00000303395.8:c.5383G>A	ENSP00000303540.4:p.Glu1795Lys	20600615	Generalized epilepsy with febrile seizures plus
SCN1A	HGMD	2-166848426-C-T	Not Qualified - Insufficient Evidence	DM	ENST00000303395.8:c.5359G>A	ENSP00000303540.4:p.Glu1787Lys	17561957	Myoclonic epilepsy of infancy
SCN1A	HGMD	2-166848439-G-C	Not Qualified - Insufficient Evidence	DM	ENST00000303395.8:c.5346C>G	ENSP00000303540.4:p.Ile1782Met	18930999	Dravet syndrome
SCN1A	HGMD	2-166848440-A-C	Not Qualified - Insufficient Evidence	DM	ENST00000303395.8:c.5345T>G	ENSP00000303540.4:p.Ile1782Ser	18930999	Dravet syndrome
SCN1A	HGMD	2-166848443-T-C	Not Qualified - Insufficient Evidence	DM	ENST00000303395.8:c.5342A>G	ENSP00000303540.4:p.Tyr1781Cys	14738421	Myoclonic epilepsy of infancy
SCN1A	HGMD	2-166848473-A-T	Not Qualified - Insufficient Evidence	DM	ENST00000303395.8:c.5312T>A	ENSP00000303540.4:p.Ile1771Asn	18930999	Dravet syndrome
SCN1A	HGMD	2-166848519-A-C	Not Qualified - Insufficient Evidence	DM	ENST00000303395.8:c.5266T>G	ENSP00000303540.4:p.Cys1756Gly	19563458	Myoclonic epilepsy of infancy
SCN1A	HGMD	2-166848615-C-G	Not Qualified - Insufficient Evidence	DM	ENST00000303395.8:c.5170G>C	ENSP00000303540.4:p.Ala1724Pro	23195492	Intractable epilepsy
SCN1A	HGMD	2-166848644-A-T	Not Qualified - Insufficient Evidence	DM	ENST00000303395.8:c.5141T>A	ENSP00000303540.4:p.Met1714Lys	18930999	Dravet syndrome
SCN1A	HGMD	2-166848647-C-T	Not Qualified - Insufficient Evidence	DM	ENST00000303395.8:c.5138G>A	ENSP00000303540.4:p.Ser1713Asn	16122630	Myoclonic epilepsy of infancy
SCN1A	HGMD	2-166848659-G-A	Not Qualified - Insufficient Evidence	DM	ENST00000303395.8:c.5126C>T	ENSP00000303540.4:p.Thr1709Ile	12566275	Myoclonic epilepsy of infancy
SCN1A	HGMD	2-166848666-A-C	Not Qualified - Insufficient Evidence	DM	ENST00000303395.8:c.5119T>G	ENSP00000303540.4:p.Phe1707Val	17347258	Myoclonic epilepsy of infancy
SCN1A	HGMD	2-166848725-A-G	Not Qualified - Insufficient Evidence	DM	ENST00000303395.8:c.5060T>C	ENSP00000303540.4:p.Phe1687Ser	17561957	Myoclonic epilepsy of infancy
SCN1A	HGMD	2-166848734-T-G	Not Qualified - Insufficient Evidence	DM	ENST00000303395.8:c.5051A>C	ENSP00000303540.4:p.Tyr1684Ser	23195492	Intractable epilepsy
SCN1A	HGMD	2-166848765-C-T	Not Qualified - Insufficient Evidence	DM	ENST00000303395.8:c.5020G>A	ENSP00000303540.4:p.Gly1674Ser	26311622	Acute encephalopathy with biphasic seizures & late reduced diffusion
SCN1A	HGMD	2-166848767-A-C	Not Qualified - Insufficient Evidence	DM	ENST00000303395.8:c.5018T>G	ENSP00000303540.4:p.Ile1673Ser	26339958	Generalised epilepsy with febrile seizures plus
SCN1A	HGMD	2-166848779-G-T	Not Qualified - Insufficient Evidence	DM	ENST00000303395.8:c.5006C>A	ENSP00000303540.4:p.Ala1669Glu	21555645	Partial seizures of infancy malignant migrating
SCN1A	HGMD	2-166848782-G-C	Not Qualified - Insufficient Evidence	DM	ENST00000303395.8:c.5003C>G	ENSP00000303540.4:p.Pro1668Arg	26096185	Dravet syndrome
SCN1A	HGMD	2-166848783-G-C	Not Qualified - Insufficient Evidence	DM	ENST00000303395.8:c.5002C>G	ENSP00000303540.4:p.Pro1668Ala	12821740	Myoclonic epilepsy of infancy
SCN1A	HGMD	2-166848788-G-A	Not Qualified - Insufficient Evidence	DM	ENST00000303395.8:c.4997C>T	ENSP00000303540.4:p.Ser1666Phe	26096185	Dravet syndrome
SCN1A	HGMD	2-166848794-A-T	Not Qualified - Insufficient Evidence	DM	ENST00000303395.8:c.4991T>A	ENSP00000303540.4:p.Met1664Lys	18930999	Dravet syndrome
SCN1A	HGMD	2-166848800-G-A	Not Qualified - Insufficient Evidence	DM	ENST00000303395.8:c.4985C>T	ENSP00000303540.4:p.Ala1662Val	23195492	Myoclonic epilepsy borderline
SCN1A	HGMD	2-166848812-G-A	Not Qualified - Insufficient Evidence	DM	ENST00000303395.8:c.4973C>T	ENSP00000303540.4:p.Thr1658Met	18930999	Dravet syndrome
SCN1A	HGMD	2-166848816-G-A	Not Qualified - Insufficient Evidence	DM	ENST00000303395.8:c.4969C>T	ENSP00000303540.4:p.Arg1657Cys	14672992	Generalized epilepsy with febrile seizures plus
SCN1A	HGMD	2-166848843-G-A	Not Qualified - Insufficient Evidence	DM	ENST00000303395.8:c.4942C>T	ENSP00000303540.4:p.Arg1648Cys	12083760	Myoclonic epilepsy of infancy
SCN1A	HGMD	2-166848860-C-A	Not Qualified - Insufficient Evidence	DM	ENST00000303395.8:c.4925G>T	ENSP00000303540.4:p.Arg1642Met	25459968	Dravet syndrome
SCN1A	HGMD	2-166848870-G-C	Not Qualified - Insufficient Evidence	DM	ENST00000303395.8:c.4915C>G	ENSP00000303540.4:p.Arg1639Gly	18930999	Dravet syndrome
SCN1A	HGMD	2-166848891-G-A	Not Qualified - Insufficient Evidence	DM	ENST00000303395.8:c.4894C>T	ENSP00000303540.4:p.Pro1632Ser	12566275	Myoclonic epilepsy of infancy
SCN1A	HGMD	2-166848897-C-G	Not Qualified - Insufficient Evidence	DM	ENST00000303395.8:c.4888G>C	ENSP00000303540.4:p.Val1630Leu	23195492	Myoclonic epilepsy borderline
SCN1A	HGMD	2-166848897-C-T	Not Qualified - Insufficient Evidence	DM	ENST00000303395.8:c.4888G>A	ENSP00000303540.4:p.Val1630Met	17561957	Myoclonic epilepsy of infancy
SCN1A	HGMD	2-166848930-T-C	Not Qualified - Insufficient Evidence	DM	ENST00000303395.8:c.4855A>G	ENSP00000303540.4:p.Met1619Val	23195492	Intractable epilepsy
SCN1A	HGMD	2-166850674-C-T	Not Qualified - Insufficient Evidence	DM	ENST00000303395.8:c.4834G>A	ENSP00000303540.4:p.Val1612Ile	18930999	Dravet syndrome
SCN1A	HGMD	2-166850677-C-A	Not Qualified - Insufficient Evidence	DM	ENST00000303395.8:c.4831G>T	ENSP00000303540.4:p.Val1611Phe	12566275	Myoclonic epilepsy of infancy
SCN1A	HGMD	2-166850772-A-T	Not Qualified - Insufficient Evidence	DM	ENST00000303395.8:c.4736T>A	ENSP00000303540.4:p.Val1579Glu	18930999	Dravet syndrome
SCN1A	HGMD	2-166850827-C-T	Not Qualified - Insufficient Evidence	DM	ENST00000303395.8:c.4681G>A	ENSP00000303540.4:p.Glu1561Lys	18930999	Dravet syndrome
SCN1A	HGMD	2-166850853-C-T	Not Qualified - Insufficient Evidence	DM	ENST00000303395.8:c.4655G>A	ENSP00000303540.4:p.Cys1552Tyr	26438699	Dravet syndrome
SCN1A	HGMD	2-166850880-A-G	Not Qualified - Insufficient Evidence	DM	ENST00000303395.8:c.4628T>C	ENSP00000303540.4:p.Phe1543Ser	17347258	Cryptogenic focal epilepsy
SCN1A	HGMD	2-166850896-C-T	Not Qualified - Insufficient Evidence	DM	ENST00000303395.8:c.4612G>A	ENSP00000303540.4:p.Val1538Ile	18930999	Dravet syndrome
SCN1A	HGMD	2-166852536-A-G	Not Qualified - Insufficient Evidence	DM	ENST00000303395.8:c.4568T>C	ENSP00000303540.4:p.Ile1523Thr	21719429	Dravet syndrome
SCN1A	HGMD	2-166852549-G-T	Not Qualified - Insufficient Evidence	DM	ENST00000303395.8:c.4555C>A	ENSP00000303540.4:p.Pro1519Thr	23398550	Dravet syndrome
SCN1A	HGMD	2-166852561-C-T	Not Qualified - Insufficient Evidence	DM	ENST00000303395.8:c.4543G>A	ENSP00000303540.4:p.Gly1515Arg	25108116	Lenox–Gastaut syndrome
SCN1A	HGMD	2-166852563-A-G	Not Qualified - Insufficient Evidence	DM	ENST00000303395.8:c.4541T>C	ENSP00000303540.4:p.Leu1514Ser	20522430	Dravet syndrome
SCN1A	HGMD	2-166852572-A-T	Not Qualified - Insufficient Evidence	DM	ENST00000303395.8:c.4532T>A	ENSP00000303540.4:p.Met1511Lys	23195492	Intractable epilepsy
SCN1A	HGMD	2-166852596-T-C	Not Qualified - Insufficient Evidence	DM	ENST00000303395.8:c.4508A>G	ENSP00000303540.4:p.Glu1503Gly	23398550	Dravet syndrome
SCN1A	HGMD	2-166854571-T-A	Not Qualified - Insufficient Evidence	DM	ENST00000303395.8:c.4453A>T	ENSP00000303540.4:p.Asn1485Tyr	23195492	Myoclonic epilepsy of infancy
SCN1A	HGMD	2-166854573-T-C	Not Qualified - Insufficient Evidence	DM	ENST00000303395.8:c.4451A>G	ENSP00000303540.4:p.Asp1484Gly	18930999	Dravet syndrome
SCN1A	HGMD	2-166854639-T-C	Not Qualified - Insufficient Evidence	DM	ENST00000303395.8:c.4385A>G	ENSP00000303540.4:p.Tyr1462Cys	18413471	Myoclonic epilepsy of infancy
SCN1A	HGMD	2-166854666-T-C	Not Qualified - Insufficient Evidence	DM	ENST00000303395.8:c.4358A>G	ENSP00000303540.4:p.Tyr1453Cys	23195492	Myoclonic epilepsy borderline
SCN1A	HGMD	2-166854673-G-T	Not Qualified - Insufficient Evidence	DM	ENST00000303395.8:c.4351C>A	ENSP00000303540.4:p.Pro1451Thr	26096185	Dravet syndrome
SCN1A	HGMD	2-166856250-C-T	Not Qualified - Insufficient Evidence	DM	ENST00000303395.8:c.4321G>A	ENSP00000303540.4:p.Ala1441Thr	25459968	Dravet syndrome
SCN1A	HGMD	2-166856276-T-C	Not Qualified - Insufficient Evidence	DM	ENST00000303395.8:c.4295A>G	ENSP00000303540.4:p.Lys1432Arg	25459968	Dravet syndrome
SCN1A	HGMD	2-166856280-A-T	Not Qualified - Insufficient Evidence	DM	ENST00000303395.8:c.4291T>A	ENSP00000303540.4:p.Phe1431Ile	18930999	Dravet syndrome
SCN1A	HGMD	2-166856285-G-T	Not Qualified - Insufficient Evidence	DM	ENST00000303395.8:c.4286C>A	ENSP00000303540.4:p.Ala1429Asp	23195492	Intractable epilepsy
SCN1A	HGMD	2-166858983-A-G	Not Qualified - Insufficient Evidence	DM	ENST00000303395.8:c.4283T>C	ENSP00000303540.4:p.Val1428Ala	11524484	Febrile seizures
SCN1A	HGMD	2-166859013-A-C	Not Qualified - Insufficient Evidence	DM	ENST00000303395.8:c.4253T>G	ENSP00000303540.4:p.Val1418Gly	23195492	Myoclonic epilepsy of infancy
SCN1A	HGMD	2-166859023-A-T	Not Qualified - Insufficient Evidence	DM	ENST00000303395.8:c.4243T>A	ENSP00000303540.4:p.Phe1415Ile	23773995	Myoclonic epilepsy of infancy
SCN1A	HGMD	2-166859050-C-T	Not Qualified - Insufficient Evidence	DM	ENST00000303395.8:c.4216G>A	ENSP00000303540.4:p.Ala1406Thr	21868258	Dravet syndrome
SCN1A	HGMD	2-166859094-T-C	Not Qualified - Insufficient Evidence	DM	ENST00000303395.8:c.4172A>G	ENSP00000303540.4:p.Asn1391Ser	18930999	Dravet syndrome
SCN1A	HGMD	2-166859113-A-C	Not Qualified - Insufficient Evidence	DM	ENST00000303395.8:c.4153T>G	ENSP00000303540.4:p.Phe1385Val	23195492	Myoclonic epilepsy of infancy
SCN1A	HGMD	2-166859152-T-C	Not Qualified - Insufficient Evidence	DM	ENST00000303395.8:c.4114A>G	ENSP00000303540.4:p.Lys1372Glu	24257433	Generalized epilepsy with febrile seizures plus
SCN1A	HGMD	2-166859154-C-A	Not Qualified - Insufficient Evidence	DM	ENST00000303395.8:c.4112G>T	ENSP00000303540.4:p.Gly1371Val	24656210	Dravet syndrome
SCN1A	HGMD	2-166859165-A-T	Not Qualified - Insufficient Evidence	DM	ENST00000303395.8:c.4101T>A	ENSP00000303540.4:p.Asn1367Lys	18930999	Dravet syndrome
SCN1A	HGMD	2-166859170-C-T	Not Qualified - Insufficient Evidence	DM	ENST00000303395.8:c.4096G>A	ENSP00000303540.4:p.Val1366Ile	17507202	Generalized epilepsy with febrile seizures plus
SCN1A	HGMD	2-166859197-A-G	Not Qualified - Insufficient Evidence	DM	ENST00000303395.8:c.4069T>C	ENSP00000303540.4:p.Phe1357Leu	23195492	Intractable epilepsy
SCN1A	HGMD	2-166859202-A-G	Not Qualified - Insufficient Evidence	DM	ENST00000303395.8:c.4064T>C	ENSP00000303540.4:p.Leu1355Pro	14738421	Myoclonic epilepsy of infancy
SCN1A	HGMD	2-166859205-C-T	Not Qualified - Insufficient Evidence	DM	ENST00000303395.8:c.4061G>A	ENSP00000303540.4:p.Cys1354Tyr	25459968	Dravet syndrome
SCN1A	HGMD	2-166859211-A-G	Not Qualified - Insufficient Evidence	DM	ENST00000303395.8:c.4055T>C	ENSP00000303540.4:p.Leu1352Pro	26096185	Dravet syndrome
SCN1A	HGMD	2-166859234-A-C	Not Qualified - Insufficient Evidence	DM	ENST00000303395.8:c.4032T>G	ENSP00000303540.4:p.Ile1344Met	23195492	Myoclonic epilepsy of infancy
SCN1A	HGMD	2-166866266-C-A	Not Qualified - Insufficient Evidence	DM	ENST00000303395.8:c.3965G>T	ENSP00000303540.4:p.Arg1322Ile	25459968	Dravet syndrome
SCN1A	HGMD	2-166866285-T-C	Not Qualified - Insufficient Evidence	DM	ENST00000303395.8:c.3946A>G	ENSP00000303540.4:p.Arg1316Gly	23195492	Myoclonic epilepsy of infancy
SCN1A	HGMD	2-166866293-T-A	Not Qualified - Insufficient Evidence	DM	ENST00000303395.8:c.3938A>T	ENSP00000303540.4:p.Lys1313Ile	25459968	Dravet syndrome
SCN1A	HGMD	2-166866306-G-A	Not Qualified - Insufficient Evidence	DM	ENST00000303395.8:c.3925C>T	ENSP00000303540.4:p.Leu1309Phe	20117752	Generalized epilepsy with febrile seizures plus
SCN1A	HGMD	2-166866307-T-A	Not Qualified - Insufficient Evidence	DM	ENST00000303395.8:c.3924A>T	ENSP00000303540.4:p.Glu1308Asp	19522081	Febrile seizures
SCN1A	HGMD	2-166866332-G-C	Not Qualified - Insufficient Evidence	DM	ENST00000303395.8:c.3899C>G	ENSP00000303540.4:p.Thr1300Arg	24168886	Dravet syndrome
SCN1A	HGMD	2-166868674-C-A	Not Qualified - Insufficient Evidence	DM	ENST00000303395.8:c.3824G>T	ENSP00000303540.4:p.Gly1275Val	18930999	Dravet syndrome
SCN1A	HGMD	2-166868689-T-G	Not Qualified - Insufficient Evidence	DM	ENST00000303395.8:c.3809A>C	ENSP00000303540.4:p.Lys1270Thr	11756608	Generalized epilepsy with febrile seizures plus
SCN1A	HGMD	2-166868722-A-C	Not Qualified - Insufficient Evidence	DM	ENST00000303395.8:c.3776T>G	ENSP00000303540.4:p.Phe1259Cys	23398550	Dravet syndrome
SCN1A	HGMD	2-166868737-T-C	Not Qualified - Insufficient Evidence	DM	ENST00000303395.8:c.3761A>G	ENSP00000303540.4:p.Tyr1254Cys	23195492	Intractable epilepsy
SCN1A	HGMD	2-166868749-G-A	Not Qualified - Insufficient Evidence	DM	ENST00000303395.8:c.3749C>T	ENSP00000303540.4:p.Thr1250Met	19522081	Generalized epilepsy with febrile seizures plus
SCN1A	HGMD	2-166868751-C-G	Not Qualified - Insufficient Evidence	DM	ENST00000303395.8:c.3747G>C	ENSP00000303540.4:p.Lys1249Asn	19522081	Generalized epilepsy with febrile seizures plus
SCN1A	HGMD	2-166868784-T-G	Not Qualified - Insufficient Evidence	DM	ENST00000303395.8:c.3714A>C	ENSP00000303540.4:p.Glu1238Asp	17347258	Myoclonic epilepsy of infancy
SCN1A	HGMD	2-166870298-C-G	Not Qualified - Insufficient Evidence	DM	ENST00000303395.8:c.3661G>C	ENSP00000303540.4:p.Glu1221Gln	26096185	Dravet syndrome
SCN1A	HGMD	2-166870321-C-T	Not Qualified - Insufficient Evidence	DM	ENST00000303395.8:c.3638G>A	ENSP00000303540.4:p.Arg1213Gln	23195492	Intractable epilepsy
SCN1A	HGMD	2-166870339-A-G	Not Qualified - Insufficient Evidence	DM	ENST00000303395.8:c.3620T>C	ENSP00000303540.4:p.Leu1207Pro	18413471	Myoclonic epilepsy of infancy
SCN1A	HGMD	2-166892737-T-A	Not Qualified - Insufficient Evidence	DM	ENST00000303395.8:c.3250A>T	ENSP00000303540.4:p.Ser1084Cys	24842605	Intractable epilepsy
SCN1A	HGMD	2-166892785-C-T	Not Qualified - Insufficient Evidence	DM	ENST00000303395.8:c.3202G>A	ENSP00000303540.4:p.Glu1068Lys	18930999	Dravet syndrome
SCN1A	ClinVar	2-166892993-G-T	Not Qualified - Insufficient Evidence	Likely pathogenic	ENST00000303395.8:c.2994C>A	ENSP00000303540.4:p.Asp998Glu	NO ID	not provided
SCN1A	HGMD	2-166892994-T-C	Not Qualified - Insufficient Evidence	DM	ENST00000303395.8:c.2993A>G	ENSP00000303540.4:p.Asp998Gly	18930999	Dravet syndrome
SCN1A	ClinVar	2-166893021-G-A	Not Qualified - Insufficient Evidence	Likely pathogenic	ENST00000303395.8:c.2966C>T	ENSP00000303540.4:p.Ala989Val	NO ID	not provided
SCN1A	HGMD	2-166893030-A-G	Not Qualified - Insufficient Evidence	DM	ENST00000303395.8:c.2957T>C	ENSP00000303540.4:p.Leu986Pro	18930999	Dravet syndrome
SCN1A	ClinVar & HGMD	2-166894303-C-T	Not Qualified - Insufficient Evidence	Pathogenic	ENST00000303395.8:c.2929G>A	ENSP00000303540.4:p.Val977Met	26096185	Severe myoclonic epilepsy in infancy
SCN1A	HGMD	2-166894365-A-G	Not Qualified - Insufficient Evidence	DM	ENST00000303395.8:c.2867T>C	ENSP00000303540.4:p.Met956Thr	25576396	Febrile seizures plus
SCN1A	ClinVar & HGMD	2-166894395-C-T	Not Qualified - Insufficient Evidence	Pathogenic	ENST00000303395.8:c.2837G>A	ENSP00000303540.4:p.Arg946His	14738421	Severe myoclonic epilepsy in infancy
SCN1A	HGMD	2-166894404-A-T	Not Qualified - Insufficient Evidence	DM	ENST00000303395.8:c.2828T>A	ENSP00000303540.4:p.Ile943Asn	18930999	Dravet syndrome
SCN1A	HGMD	2-166894413-G-A	Not Qualified - Insufficient Evidence	DM	ENST00000303395.8:c.2819C>T	ENSP00000303540.4:p.Ser940Phe	23195492	Myoclonic epilepsy of infancy
SCN1A	ClinVar	2-166894426-C-A	Not Qualified - Insufficient Evidence	Pathogenic	ENST00000303395.8:c.2806G>T	ENSP00000303540.4:p.Asp936Tyr	NO ID	not provided
SCN1A	HGMD	2-166894429-T-G	Not Qualified - Insufficient Evidence	DM	ENST00000303395.8:c.2803A>C	ENSP00000303540.4:p.Asn935His	18566737	Generalized epilepsy with febrile seizures plus
SCN1A	ClinVar	2-166894431-A-C	Not Qualified - Insufficient Evidence	Likely pathogenic	ENST00000303395.8:c.2801T>G	ENSP00000303540.4:p.Met934Arg	NO ID	not provided
SCN1A	ClinVar	2-166894510-C-G	Not Qualified - Insufficient Evidence	Likely pathogenic	ENST00000303395.8:c.2722G>C	ENSP00000303540.4:p.Gly908Arg	NO ID	not provided
SCN1A	HGMD	2-166894546-C-A	Not Qualified - Insufficient Evidence	DM	ENST00000303395.8:c.2686G>T	ENSP00000303540.4:p.Val896Phe	23195492	Myoclonic epilepsy borderline
SCN1A	HGMD	2-166894546-C-T	Not Qualified - Insufficient Evidence	DM	ENST00000303395.8:c.2686G>A	ENSP00000303540.4:p.Val896Ile	22780858	Dravet syndrome
SCN1A	ClinVar	2-166894551-G-C	Not Qualified - Insufficient Evidence	Likely pathogenic	ENST00000303395.8:c.2681C>G	ENSP00000303540.4:p.Thr894Ser	NO ID	not provided
SCN1A	HGMD	2-166894606-A-T	Not Qualified - Insufficient Evidence	DM	ENST00000303395.8:c.2626T>A	ENSP00000303540.4:p.Leu876Ile	23195492	Myoclonic epilepsy of infancy
SCN1A	HGMD	2-166894639-G-C	Not Qualified - Insufficient Evidence	DM	ENST00000303395.8:c.2593C>G	ENSP00000303540.4:p.Arg865Gly	21864321	Dravet syndrome
SCN1A	ClinVar & HGMD	2-166895946-C-T	Not Qualified - Insufficient Evidence	Pathogenic	ENST00000303395.8:c.2576G>A	ENSP00000303540.4:p.Arg859His	21864321	Severe myoclonic epilepsy in infancy
SCN1A	ClinVar	2-166895953-C-T	Not Qualified - Insufficient Evidence	Likely pathogenic	ENST00000303395.8:c.2569G>A	ENSP00000303540.4:p.Val857Ile	NO ID	not provided
SCN1A	ClinVar	2-166896018-A-G	Not Qualified - Insufficient Evidence	Likely pathogenic	ENST00000303395.8:c.2504T>C	ENSP00000303540.4:p.Phe835Ser	NO ID	not provided
SCN1A	ClinVar	2-166898843-C-T	Not Qualified - Insufficient Evidence	Likely pathogenic	ENST00000303395.8:c.2135G>A	ENSP00000303540.4:p.Arg712Gln	NO ID	not provided
SCN1A	ClinVar	2-166900456-T-A	Not Qualified - Insufficient Evidence	Likely pathogenic	ENST00000303395.8:c.1766A>T	ENSP00000303540.4:p.Asp589Val	23757202	Severe myoclonic epilepsy in infancy
SCN1A	HGMD	2-166903431-A-C	Not Qualified - Insufficient Evidence	DM	ENST00000303395.8:c.1226T>G	ENSP00000303540.4:p.Leu409Trp	23195492	Myoclonic epilepsy of infancy
SCN1A	HGMD	2-166903435-A-G	Not Qualified - Insufficient Evidence	DM	ENST00000303395.8:c.1222T>C	ENSP00000303540.4:p.Phe408Leu	21703448	Epilepsy idiopathic
SCN1A	ClinVar	2-166903453-A-G	Not Qualified - Insufficient Evidence	Likely pathogenic	ENST00000303395.8:c.1204T>C	ENSP00000303540.4:p.Phe402Leu	NO ID	not provided
SCN1A	ClinVar	2-166904154-C-T	Not Qualified - Insufficient Evidence	Pathogenic	ENST00000303395.8:c.1153G>A	ENSP00000303540.4:p.Glu385Lys	NO ID	not provided
SCN1A	HGMD	2-166904171-A-C	Not Qualified - Insufficient Evidence	DM	ENST00000303395.8:c.1136T>G	ENSP00000303540.4:p.Met379Arg	22612257	Dravet syndrome
SCN1A	HGMD	2-166904174-A-T	Not Qualified - Insufficient Evidence	DM	ENST00000303395.8:c.1133T>A	ENSP00000303540.4:p.Leu378Gln	18930999	Dravet syndrome
SCN1A	ClinVar & HGMD	2-166904177-C-T	Not Qualified - Insufficient Evidence	Likely pathogenic;Pathogenic	ENST00000303395.8:c.1130G>A	ENSP00000303540.4:p.Arg377Gln	26096185	Severe myoclonic epilepsy in infancy
SCN1A	HGMD	2-166904220-T-G	Not Qualified - Insufficient Evidence	DM	ENST00000303395.8:c.1087A>C	ENSP00000303540.4:p.Thr363Pro	23195492	Myoclonic epilepsy of infancy
SCN1A	ClinVar & HGMD	2-166904231-T-A	Not Qualified - Insufficient Evidence	Pathogenic	ENST00000303395.8:c.1076A>T	ENSP00000303540.4:p.Asn359Ile	NO ID	Dravet syndrome
SCN1A	HGMD	2-166904231-T-G	Not Qualified - Insufficient Evidence	DM	ENST00000303395.8:c.1076A>C	ENSP00000303540.4:p.Asn359Thr	23708187	Dravet syndrome
SCN1A	ClinVar & HGMD	2-166904261-T-C	Not Qualified - Insufficient Evidence	Pathogenic	ENST00000303395.8:c.1046A>G	ENSP00000303540.4:p.Tyr349Cys	26096185	Severe myoclonic epilepsy in infancy
SCN1A	HGMD	2-166905405-G-A	Not Qualified - Insufficient Evidence	DM	ENST00000303395.8:c.1019C>T	ENSP00000303540.4:p.Ser340Phe	18930999	Dravet syndrome
SCN1A	ClinVar	2-166905429-T-C	Not Qualified - Insufficient Evidence	Likely pathogenic	ENST00000303395.8:c.995A>G	ENSP00000303540.4:p.Asp332Gly	NO ID	not provided
SCN1A	ClinVar	2-166905439-C-A	Not Qualified - Insufficient Evidence	Likely pathogenic	ENST00000303395.8:c.985G>T	ENSP00000303540.4:p.Gly329Cys	NO ID	not provided
SCN1A	HGMD	2-166908244-A-G	Not Qualified - Insufficient Evidence	DM	ENST00000303395.8:c.949T>C	ENSP00000303540.4:p.Tyr317His	25459968	Dravet syndrome
SCN1A	HGMD	2-166908324-T-C	Not Qualified - Insufficient Evidence	DM	ENST00000303395.8:c.869A>G	ENSP00000303540.4:p.His290Arg	23195492	Intractable epilepsy
SCN1A	HGMD	2-166908352-G-A	Not Qualified - Insufficient Evidence	DM	ENST00000303395.8:c.841C>T	ENSP00000303540.4:p.Pro281Ser	18930999	Dravet syndrome
SCN1A	HGMD	2-166908352-G-C	Not Qualified - Insufficient Evidence	DM	ENST00000303395.8:c.841C>G	ENSP00000303540.4:p.Pro281Ala	23195492	Myoclonic epilepsy of infancy
SCN1A	ClinVar	2-166908366-T-A	Not Qualified - Insufficient Evidence	Likely pathogenic	ENST00000303395.8:c.827A>T	ENSP00000303540.4:p.Lys276Ile	NO ID	not provided
SCN1A	ClinVar	2-166908402-A-G	Not Qualified - Insufficient Evidence	Likely pathogenic	ENST00000303395.8:c.791T>C	ENSP00000303540.4:p.Ile264Thr	NO ID	not provided
SCN1A	HGMD	2-166908432-G-A	Not Qualified - Insufficient Evidence	DM	ENST00000303395.8:c.761C>T	ENSP00000303540.4:p.Thr254Ile	21248271	Febrile seizures plus
SCN1A	HGMD	2-166908437-G-C	Not Qualified - Insufficient Evidence	DM	ENST00000303395.8:c.756C>G	ENSP00000303540.4:p.Ile252Met	23195492	Intractable epilepsy
SCN1A	HGMD	2-166908465-G-A	Not Qualified - Insufficient Evidence	DM	ENST00000303395.8:c.728C>T	ENSP00000303540.4:p.Ser243Phe	25459968	Dravet syndrome
SCN1A	HGMD	2-166909362-C-T	Not Qualified - Insufficient Evidence	DM	ENST00000303395.8:c.694G>A	ENSP00000303540.4:p.Gly232Ser	18930999	Dravet syndrome
SCN1A	HGMD	2-166909379-G-T	Not Qualified - Insufficient Evidence	DM	ENST00000303395.8:c.677C>A	ENSP00000303540.4:p.Thr226Lys	21719429	Dravet syndrome
SCN1A	ClinVar	2-166909385-A-G	Not Qualified - Insufficient Evidence	Likely pathogenic	ENST00000303395.8:c.671T>C	ENSP00000303540.4:p.Leu224Ser	NO ID	not provided
SCN1A	ClinVar	2-166909400-C-G	Not Qualified - Insufficient Evidence	Likely pathogenic	ENST00000303395.8:c.656G>C	ENSP00000303540.4:p.Arg219Thr	NO ID	not provided
SCN1A	HGMD	2-166909404-A-G	Not Qualified - Insufficient Evidence	DM	ENST00000303395.8:c.652T>C	ENSP00000303540.4:p.Phe218Leu	19339291	Generalised epilepsy with febrile seizures plus 2
SCN1A	ClinVar	2-166911148-G-T	Not Qualified - Insufficient Evidence	Likely pathogenic	ENST00000303395.8:c.602C>A	ENSP00000303540.4:p.Ala201Glu	NO ID	not provided
SCN1A	HGMD	2-166911169-T-C	Not Qualified - Insufficient Evidence	DM	ENST00000303395.8:c.581A>G	ENSP00000303540.4:p.Asp194Gly	18930999	Dravet syndrome
SCN1A	HGMD	2-166911169-T-G	Not Qualified - Insufficient Evidence	DM	ENST00000303395.8:c.581A>C	ENSP00000303540.4:p.Asp194Ala	25459968	Dravet syndrome
SCN1A	HGMD	2-166911177-G-C	Not Qualified - Insufficient Evidence	DM	ENST00000303395.8:c.573C>G	ENSP00000303540.4:p.Asn191Lys	18930999	Dravet syndrome
SCN1A	ClinVar & HGMD	2-166911182-A-G	Not Qualified - Insufficient Evidence	Pathogenic	ENST00000303395.8:c.568T>C	ENSP00000303540.4:p.Trp190Arg	26096185	Severe myoclonic epilepsy in infancy
SCN1A	ClinVar & HGMD	2-166911187-T-A	Not Qualified - Insufficient Evidence	Pathogenic	ENST00000303395.8:c.563A>T	ENSP00000303540.4:p.Asp188Val	11254444	Generalized epilepsy with febrile seizures plus, type 1
SCN1A	HGMD	2-166911215-A-G	Not Qualified - Insufficient Evidence	DM	ENST00000303395.8:c.535T>C	ENSP00000303540.4:p.Cys179Arg	23195492	Myoclonic epilepsy of infancy
SCN1A	HGMD	2-166911217-A-G	Not Qualified - Insufficient Evidence	DM	ENST00000303395.8:c.533T>C	ENSP00000303540.4:p.Phe178Ser	23195492	Intractable epilepsy
SCN1A	ClinVar	2-166911245-A-G	Not Qualified - Insufficient Evidence	Likely pathogenic	ENST00000303395.8:c.505T>C	ENSP00000303540.4:p.Ser169Pro	NO ID	not provided
SCN1A	ClinVar	2-166912922-C-G	Not Qualified - Insufficient Evidence	Likely pathogenic	ENST00000303395.8:c.472G>C	ENSP00000303540.4:p.Glu158Gln	NO ID	not provided
SCN1A	ClinVar	2-166912960-A-T	Not Qualified - Insufficient Evidence	Pathogenic	ENST00000303395.8:c.434T>A	ENSP00000303540.4:p.Met145Lys	NO ID	not provided
SCN1A	HGMD	2-166915146-G-A	Not Qualified - Insufficient Evidence	DM	ENST00000303395.8:c.317C>T	ENSP00000303540.4:p.Ser106Phe	24902755	Dravet syndrome
SCN1A	ClinVar & HGMD	2-166915149-G-A	Not Qualified - Insufficient Evidence	Pathogenic	ENST00000303395.8:c.314C>T	ENSP00000303540.4:p.Thr105Ile	NO ID	Myoclonic epilepsy of infancy
SCN1A	HGMD	2-166915185-A-G	Not Qualified - Insufficient Evidence	DM	ENST00000303395.8:c.278T>C	ENSP00000303540.4:p.Leu93Ser	25459968	Dravet syndrome
SCN1A	HGMD	2-166929951-G-A	Not Qualified - Insufficient Evidence	DM	ENST00000303395.8:c.181C>T	ENSP00000303540.4:p.Leu61Phe	18930999	Dravet syndrome
SCN1A	HGMD	2-166929959-C-A	Not Qualified - Insufficient Evidence	DM	ENST00000303395.8:c.173G>T	ENSP00000303540.4:p.Gly58Val	18930999	Dravet syndrome
SCN1A	ClinVar & HGMD	2-166930050-G-A	Not Qualified - Insufficient Evidence	Pathogenic	ENST00000303395.8:c.82C>T	ENSP00000303540.4:p.Arg28Cys	NO ID	Generalized epilepsy with febrile seizures plus
SCN1A	HGMD	2-166848218-A-G	Not Qualified - Inaccessible	DM	ENST00000303395.8:c.5567T>C	ENSP00000303540.4:p.Met1856Thr	18076640	Generalized epilepsy with febrile seizures plus
SCN1A	HGMD	2-166848480-A-G	Not Qualified - Inaccessible	DM	ENST00000303395.8:c.5305T>C	ENSP00000303540.4:p.Tyr1769His	18076640	Generalized epilepsy with febrile seizures plus
SCN1A	HGMD	2-166850661-A-G	Not Qualified - Inaccessible	DM	ENST00000303395.8:c.4847T>C	ENSP00000303540.4:p.Ile1616Thr	18076640	Generalized epilepsy with febrile seizures plus
SCN1A	HGMD	2-166850893-T-G	Not Qualified - Inaccessible	DM	ENST00000303395.8:c.4615A>C	ENSP00000303540.4:p.Thr1539Pro	18076640	Dravet syndrome
SCN1A	HGMD	2-166859122-C-G	Not Qualified - Inaccessible	DM	ENST00000303395.8:c.4144G>C	ENSP00000303540.4:p.Gly1382Arg	23158734	Generalized epilepsy with febrile seizures plus
SCN1A	HGMD	2-166866233-A-G	Not Qualified - Inaccessible	DM	ENST00000303395.8:c.3998T>C	ENSP00000303540.4:p.Met1333Thr	21425109	Generalized epilepsy with febrile seizures plus
SCN1A	HGMD	2-166893017-C-A	Not Qualified - Inaccessible	DM	ENST00000303395.8:c.2970G>T	ENSP00000303540.4:p.Leu990Phe	18076640	Dravet syndrome
SCN1A	HGMD	2-166894363-A-G	Not Qualified - Inaccessible	DM	ENST00000303395.8:c.2869T>C	ENSP00000303540.4:p.Trp957Arg	21425109	Myoclonic epilepsy of infancy
SCN1A	HGMD	2-166897794-C-T	Not Qualified - Inaccessible	DM	ENST00000303395.8:c.2362G>A	ENSP00000303540.4:p.Glu788Lys	18076640	Dravet syndrome
SCN1A	HGMD	2-166904177-C-A	Not Qualified - Inaccessible	DM	ENST00000303395.8:c.1130G>T	ENSP00000303540.4:p.Arg377Leu	18076640	Dravet syndrome
SCN1A	HGMD	2-166908364-A-C	Not Qualified - Inaccessible	DM	ENST00000303395.8:c.829T>G	ENSP00000303540.4:p.Cys277Gly	20487708	Dravet syndrome
SCN1A	HGMD	2-166909421-A-G	Not Qualified - Inaccessible	DM	ENST00000303395.8:c.635T>C	ENSP00000303540.4:p.Val212Ala	18076640	Dravet syndrome
SCN1A	HGMD	2-166911262-C-T	Not Qualified - Inaccessible	DM	ENST00000303395.8:c.488G>A	ENSP00000303540.4:p.Gly163Glu	18076640	Dravet syndrome
SCN2A	ClinVar & HGMD	2-166165924-G-A	Qualified - Sufficient Segregation Support	Pathogenic	ENST00000283256.10:c.668G>A	ENSP00000283256.6:p.Arg223Gln	11326335	Benign familial neonatal-infantile seizures
SCN2A	ClinVar & HGMD	2-166201176-G-A	Qualified - Sufficient Segregation Support	Pathogenic	ENST00000283256.10:c.2674G>A	ENSP00000283256.6:p.Val892Ile	15048894	Benign familial neonatal-infantile seizures
SCN2A	HGMD	2-166229846-G-A	Qualified - Sufficient Segregation Support	DM	ENST00000283256.10:c.3961G>A	ENSP00000283256.6:p.Glu1321Lys	25982755	Seizures benign infantile
SCN2A	ClinVar & HGMD	2-166231210-C-T	Qualified - Sufficient Segregation Support	Pathogenic	ENST00000283256.10:c.3988C>T	ENSP00000283256.6:p.Leu1330Phe	12243921	Benign familial neonatal-infantile seizures
SCN2A	ClinVar & HGMD	2-166243391-C-G	Qualified - Sufficient Segregation Support	Pathogenic	ENST00000283256.10:c.4687C>G	ENSP00000283256.6:p.Leu1563Val	12243921	Benign familial neonatal-infantile seizures
SCN2A	HGMD	2-166243470-A-G	Qualified - Sufficient Segregation Support	DM	ENST00000283256.10:c.4766A>G	ENSP00000283256.6:p.Tyr1589Cys	23758435	Neonatal-infantile seizures benign familial
SCN2A	HGMD	2-166201069-G-T	Qualified - Mosaic in literature	DM	ENST00000283256.10:c.2567G>T	ENSP00000283256.6:p.Arg856Leu	26291284	Epilepsy of infancy with migrating focal seizures
SCN2A	HGMD	2-166231198-G-C	Qualified - Mosaic in literature	DM	ENST00000283256.10:c.3976G>C	ENSP00000283256.6:p.Val1326Leu	23935176	Ohtahara syndrome
SCN2A	HGMD	2-166164379-G-T	Qualified - De novo in literature	DM	ENST00000283256.10:c.408G>T	ENSP00000283256.6:p.Met136Ile	23708187	Epileptic encephalopathy early onset
SCN2A	HGMD	2-166165205-A-G	Qualified - De novo in literature	DM	ENST00000283256.10:c.506A>G	ENSP00000283256.6:p.Glu169Gly	23935176	Epileptic encephalopathy early onset
SCN2A	HGMD	2-166165888-G-A	Qualified - De novo in literature	DM	ENST00000283256.10:c.632G>A	ENSP00000283256.6:p.Gly211Asp	23662938	West syndrome with hypotonia
SCN2A	HGMD	2-166165890-A-G	Qualified - De novo in literature	DM	ENST00000283256.10:c.634A>G	ENSP00000283256.6:p.Asn212Asp	23935176	Ohtahara syndrome
SCN2A	HGMD	2-166165894-T-A	Qualified - De novo in literature	DM	ENST00000283256.10:c.638T>A	ENSP00000283256.6:p.Val213Asp	23935176	Epileptic encephalopathy early onset
SCN2A	HGMD	2-166165914-A-G	Qualified - De novo in literature	DM	ENST00000283256.10:c.658A>G	ENSP00000283256.6:p.Arg220Gly	25818041	Epileptic encephalopathy
SCN2A	HGMD	2-166166842-C-G	Qualified - De novo in literature	DM	ENST00000283256.10:c.707C>G	ENSP00000283256.6:p.Thr236Ser	23935176	Ohtahara syndrome
SCN2A	HGMD	2-166166853-G-T	Qualified - De novo in literature	DM	ENST00000283256.10:c.718G>T	ENSP00000283256.6:p.Ala240Ser	26291284	Epilepsy of infancy with migrating focal seizures
SCN2A	HGMD	2-166166916-G-A	Qualified - De novo in literature	DM	ENST00000283256.10:c.781G>A	ENSP00000283256.6:p.Val261Met	20371507	Neonatal-infantile seizures
SCN2A	HGMD	2-166166922-G-A	Qualified - De novo in literature	DM	ENST00000283256.10:c.787G>A	ENSP00000283256.6:p.Ala263Thr	23935176	Epileptic encephalopathy early onset
SCN2A	ClinVar & HGMD	2-166166923-C-T	Qualified - De novo in literature	Pathogenic	ENST00000283256.10:c.788C>T	ENSP00000283256.6:p.Ala263Val	18414213	Benign familial neonatal-infantile seizures
SCN2A	HGMD	2-166201129-A-C	Qualified - De novo in literature	DM	ENST00000283256.10:c.2627A>C	ENSP00000283256.6:p.Asn876Thr	23935176	Ohtahara syndrome
SCN2A	ClinVar & HGMD	2-166201217-G-C	Qualified - De novo in literature	Pathogenic	ENST00000283256.10:c.2715G>C	ENSP00000283256.6:p.Lys905Asn	NO ID	Epileptic encephalopathy
SCN2A	HGMD	2-166210710-C-A	Qualified - De novo in literature	DM	ENST00000283256.10:c.2928C>A	ENSP00000283256.6:p.Asn976Lys	26291284	Epileptic encephalopathy
SCN2A	ClinVar & HGMD	2-166210777-G-A	Qualified - De novo in literature	Pathogenic	ENST00000283256.10:c.2995G>A	ENSP00000283256.6:p.Glu999Lys	NO ID	Ohtahara syndrome
SCN2A	HGMD	2-166229820-G-C	Qualified - De novo in literature	DM	ENST00000283256.10:c.3935G>C	ENSP00000283256.6:p.Arg1312Thr	19783390	Neonatal-infantile seizures
SCN2A	ClinVar & HGMD	2-166229841-G-A	Qualified - De novo in literature	Pathogenic	ENST00000283256.10:c.3956G>A	ENSP00000283256.6:p.Arg1319Gln	15048894	Benign familial neonatal-infantile seizures
SCN2A	HGMD	2-166229852-A-G	Qualified - De novo in literature	DM	ENST00000283256.10:c.3967A>G	ENSP00000283256.6:p.Met1323Val	23935176	Ohtahara syndrome
SCN2A	HGMD	2-166231229-C-A	Qualified - De novo in literature	DM	ENST00000283256.10:c.4007C>A	ENSP00000283256.6:p.Ser1336Tyr	23935176	Ohtahara syndrome
SCN2A	HGMD	2-166231235-T-C	Qualified - De novo in literature	DM	ENST00000283256.10:c.4013T>C	ENSP00000283256.6:p.Met1338Thr	23935176	Ohtahara syndrome
SCN2A	ClinVar & HGMD	2-166231247-T-C	Qualified - De novo in literature	Likely pathogenic	ENST00000283256.10:c.4025T>C	ENSP00000283256.6:p.Leu1342Pro	NO ID	Epileptic encephalopathy
SCN2A	ClinVar & HGMD	2-166234116-A-G	Qualified - De novo in literature	Likely pathogenic	ENST00000283256.10:c.4264A>G	ENSP00000283256.6:p.Lys1422Glu	NO ID	Spasms infantile and bitemporal glucose hypometabolism
SCN2A	ClinVar & HGMD	2-166237212-A-G	Qualified - De novo in literature	Pathogenic	ENST00000283256.10:c.4419A>G	ENSP00000283256.6:p.Ile1473Met	19786696	Early infantile epileptic encephalopathy 11
SCN2A	HGMD	2-166243481-G-A	Qualified - De novo in literature	DM	ENST00000283256.10:c.4777G>A	ENSP00000283256.6:p.Gly1593Arg	26291284	Epilepsy of infancy with migrating focal seizures
SCN2A	HGMD	2-166243497-A-G	Qualified - De novo in literature	DM	ENST00000283256.10:c.4793A>G	ENSP00000283256.6:p.Asp1598Gly	22581936	Intellectual disability developmental delay seizures & hypotonia
SCN2A	HGMD	2-166245184-C-A	Qualified - De novo in literature	DM	ENST00000283256.10:c.4868C>A	ENSP00000283256.6:p.Thr1623Asn	23935176	Ohtahara syndrome
SCN2A	ClinVar & HGMD	2-166245193-G-A	Qualified - De novo in literature	Likely pathogenic	ENST00000283256.10:c.4877G>A	ENSP00000283256.6:p.Arg1626Gln	NO ID	Seizures benign infantile
SCN2A	ClinVar	2-166245202-G-A	Qualified - De novo in literature	Likely pathogenic	ENST00000283256.10:c.4886G>A	ENSP00000283256.6:p.Arg1629His	NO ID	not provided
SCN2A	HGMD	2-166245217-G-T	Qualified - De novo in literature	DM	ENST00000283256.10:c.4901G>T	ENSP00000283256.6:p.Gly1634Val	26291284	Ohtahara syndrome
SCN2A	HGMD	2-166245295-T-G	Qualified - De novo in literature	DM	ENST00000283256.10:c.4979T>G	ENSP00000283256.6:p.Leu1660Trp	25457084	Encephalopathy recurrent
SCN2A	ClinVar	2-166245633-G-A	Qualified - De novo in literature	Likely pathogenic	ENST00000283256.10:c.5317G>A	ENSP00000283256.6:p.Ala1773Thr	NO ID	not provided
SCN2A	HGMD	2-166245874-A-G	Qualified - De novo in literature	DM	ENST00000283256.10:c.5558A>G	ENSP00000283256.6:p.His1853Arg	24463883	Ohtahara syndrome
SCN2A	ClinVar & HGMD	2-166245961-G-A	Qualified - De novo in literature	Likely pathogenic;Pathogenic	ENST00000283256.10:c.5645G>A	ENSP00000283256.6:p.Arg1882Gln	23708187	Benign familial neonatal-infantile seizures
SCN2A	ClinVar	2-166166925-C-G	Qualified - ClinVar "de novo"	Pathogenic	ENST00000283256.10:c.790C>G	ENSP00000283256.6:p.Leu264Val	NO ID	not provided
SCN2A	ClinVar	2-166166986-A-G	Qualified - ClinVar "de novo"	Pathogenic	ENST00000283256.10:c.851A>G	ENSP00000283256.6:p.Asp284Gly	NO ID	not provided
SCN2A	ClinVar	2-166170242-C-G	Qualified - ClinVar "de novo"	Pathogenic	ENST00000283256.10:c.1147C>G	ENSP00000283256.6:p.Gln383Glu	NO ID	not provided
SCN2A	ClinVar	2-166170418-C-T	Qualified - ClinVar "de novo"	Likely pathogenic	ENST00000283256.10:c.1183C>T	ENSP00000283256.6:p.Arg395Cys	NO ID	not provided
SCN2A	ClinVar	2-166170506-T-C	Qualified - ClinVar "de novo"	Pathogenic	ENST00000283256.10:c.1271T>C	ENSP00000283256.6:p.Val424Ala	NO ID	not provided
SCN2A	ClinVar	2-166170518-A-G	Qualified - ClinVar "de novo"	Likely pathogenic	ENST00000283256.10:c.1283A>G	ENSP00000283256.6:p.Tyr428Cys	NO ID	not provided
SCN2A	ClinVar	2-166187996-T-C	Qualified - ClinVar "de novo"	Pathogenic	ENST00000283256.10:c.2306T>C	ENSP00000283256.6:p.Ile769Thr	NO ID	not provided
SCN2A	ClinVar & HGMD	2-166198975-G-A	Qualified - ClinVar "de novo"	Likely pathogenic;Pathogenic	ENST00000283256.10:c.2558G>A	ENSP00000283256.6:p.Arg853Gln	23934111	West syndrome
SCN2A	ClinVar	2-166201144-T-A	Qualified - ClinVar "de novo"	Likely pathogenic	ENST00000283256.10:c.2642T>A	ENSP00000283256.6:p.Leu881Gln	NO ID	not provided
SCN2A	ClinVar	2-166210742-G-T	Qualified - ClinVar "de novo"	Likely pathogenic;Pathogenic	ENST00000283256.10:c.2960G>T	ENSP00000283256.6:p.Ser987Ile	25326637	not provided
SCN2A	ClinVar & HGMD	2-166223837-G-A	Qualified - ClinVar "de novo"	Likely pathogenic;Pathogenic	ENST00000283256.10:c.3631G>A	ENSP00000283256.6:p.Glu1211Lys	18414213	Benign familial neonatal-infantile seizures
SCN2A	ClinVar	2-166229829-G-A	Qualified - ClinVar "de novo"	Pathogenic	ENST00000283256.10:c.3944G>A	ENSP00000283256.6:p.Arg1315Lys	NO ID	not provided
SCN2A	ClinVar	2-166229832-C-T	Qualified - ClinVar "de novo"	Pathogenic	ENST00000283256.10:c.3947C>T	ENSP00000283256.6:p.Ala1316Val	NO ID	not provided
SCN2A	ClinVar & HGMD	2-166231199-T-A	Qualified - ClinVar "de novo"	Pathogenic	ENST00000283256.10:c.3977T>A	ENSP00000283256.6:p.Val1326Asp	NO ID	Migrating focal seizures of infancy
SCN2A	ClinVar	2-166231258-A-G	Qualified - ClinVar "de novo"	Pathogenic	ENST00000283256.10:c.4036A>G	ENSP00000283256.6:p.Ile1346Val	NO ID	not provided
SCN2A	ClinVar	2-166237624-A-G	Qualified - ClinVar "de novo"	Pathogenic	ENST00000283256.10:c.4468A>G	ENSP00000283256.6:p.Met1490Val	NO ID	N/A
SCN2A	ClinVar	2-166243334-A-G	Qualified - ClinVar "de novo"	Likely pathogenic	ENST00000283256.10:c.4630A>G	ENSP00000283256.6:p.Asn1544Asp	NO ID	not provided
SCN2A	ClinVar	2-166243405-T-A	Qualified - ClinVar "de novo"	Likely pathogenic	ENST00000283256.10:c.4701T>A	ENSP00000283256.6:p.Asn1567Lys	NO ID	not provided
SCN2A	ClinVar	2-166243422-T-C	Qualified - ClinVar "de novo"	Pathogenic	ENST00000283256.10:c.4718T>C	ENSP00000283256.6:p.Leu1573Pro	NO ID	not provided
SCN2A	ClinVar	2-166243430-G-A	Qualified - ClinVar "de novo"	Pathogenic	ENST00000283256.10:c.4726G>A	ENSP00000283256.6:p.Gly1576Arg	NO ID	N/A
SCN2A	ClinVar	2-166243526-G-A	Qualified - ClinVar "de novo"	Likely pathogenic	ENST00000283256.10:c.4822G>A	ENSP00000283256.6:p.Gly1608Arg	NO ID	not provided
SCN2A	ClinVar & HGMD	2-166165261-C-T	Not Qualified - Insufficient Evidence	Pathogenic	ENST00000283256.10:c.562C>T	ENSP00000283256.6:p.Arg188Trp	11371648	Benign familial neonatal-infantile seizures
SCN2A	HGMD	2-166165879-T-A	Not Qualified - Insufficient Evidence	DM	ENST00000283256.10:c.623T>A	ENSP00000283256.6:p.Val208Glu	22612257	Infantile seizures benign
SCN2A	ClinVar	2-166165903-T-G	Not Qualified - Insufficient Evidence	Likely pathogenic	ENST00000283256.10:c.647T>G	ENSP00000283256.6:p.Leu216Trp	NO ID	not provided
SCN2A	HGMD	2-166165909-C-A	Not Qualified - Insufficient Evidence	DM	ENST00000283256.10:c.653C>A	ENSP00000283256.6:p.Thr218Lys	26291284	Epilepsy of infancy with migrating focal seizures
SCN2A	ClinVar & HGMD	2-166166889-A-G	Not Qualified - Insufficient Evidence	Pathogenic	ENST00000283256.10:c.754A>G	ENSP00000283256.6:p.Met252Val	20371507	Benign familial neonatal-infantile seizures
SCN2A	HGMD	2-166167099-G-A	Not Qualified - Insufficient Evidence	DM	ENST00000283256.10:c.964G>A	ENSP00000283256.6:p.Asp322Asn	19783390	Neonatal-infantile seizures
SCN2A	ClinVar	2-166170502-G-C	Not Qualified - Insufficient Evidence	Likely pathogenic	ENST00000283256.10:c.1267G>C	ENSP00000283256.6:p.Val423Leu	19786696	not provided
SCN2A	ClinVar	2-166170524-A-C	Not Qualified - Insufficient Evidence	Pathogenic	ENST00000283256.10:c.1289A>C	ENSP00000283256.6:p.Glu430Ala	NO ID	not provided
SCN2A	ClinVar & HGMD	2-166170524-A-G	Not Qualified - Insufficient Evidence	Likely pathogenic	ENST00000283256.10:c.1289A>G	ENSP00000283256.6:p.Glu430Gly	NO ID	Epileptic encephalopathy early onset
SCN2A	ClinVar	2-166170547-G-A	Not Qualified - Insufficient Evidence	Likely pathogenic	ENST00000283256.10:c.1312G>A	ENSP00000283256.6:p.Glu438Lys	NO ID	not provided
SCN2A	HGMD	2-166179718-C-T	Not Qualified - Insufficient Evidence	DM	ENST00000283256.10:c.1724C>T	ENSP00000283256.6:p.Ala575Val	19786696	Neonatal-infantile seizures
SCN2A	HGMD	2-166179939-G-A	Not Qualified - Insufficient Evidence	DM	ENST00000283256.10:c.1945G>A	ENSP00000283256.6:p.Asp649Asn	22029951	Dravet syndrome
SCN2A	ClinVar	2-166198897-A-G	Not Qualified - Insufficient Evidence	Likely pathogenic	ENST00000283256.10:c.2480A>G	ENSP00000283256.6:p.Asp827Gly	NO ID	not provided
SCN2A	ClinVar	2-166201069-G-A	Not Qualified - Insufficient Evidence	Likely pathogenic	ENST00000283256.10:c.2567G>A	ENSP00000283256.6:p.Arg856Gln	18414213	N/A
SCN2A	ClinVar	2-166201106-T-G	Not Qualified - Insufficient Evidence	Likely pathogenic	ENST00000283256.10:c.2604T>G	ENSP00000283256.6:p.Asn868Lys	NO ID	not provided
SCN2A	ClinVar & HGMD	2-166201137-G-A	Not Qualified - Insufficient Evidence	Likely pathogenic	ENST00000283256.10:c.2635G>A	ENSP00000283256.6:p.Gly879Arg	NO ID	Epileptic encephalopathy early infantile
SCN2A	ClinVar	2-166201153-T-A	Not Qualified - Insufficient Evidence	Likely pathogenic	ENST00000283256.10:c.2651T>A	ENSP00000283256.6:p.Leu884His	NO ID	not provided
SCN2A	ClinVar	2-166201159-T-C	Not Qualified - Insufficient Evidence	Likely pathogenic	ENST00000283256.10:c.2657T>C	ENSP00000283256.6:p.Leu886Ser	NO ID	not provided
SCN2A	ClinVar	2-166201197-G-A	Not Qualified - Insufficient Evidence	Likely pathogenic	ENST00000283256.10:c.2695G>A	ENSP00000283256.6:p.Gly899Ser	NO ID	not provided
SCN2A	ClinVar	2-166201198-G-A	Not Qualified - Insufficient Evidence	Likely pathogenic	ENST00000283256.10:c.2696G>A	ENSP00000283256.6:p.Gly899Asp	NO ID	not provided
SCN2A	HGMD	2-166201285-T-G	Not Qualified - Insufficient Evidence	DM	ENST00000283256.10:c.2783T>G	ENSP00000283256.6:p.Phe928Cys	23708187	Epileptic encephalopathy
SCN2A	HGMD	2-166210785-T-A	Not Qualified - Insufficient Evidence	DM	ENST00000283256.10:c.3003T>A	ENSP00000283256.6:p.Asn1001Lys	16417554	Neonatal-infantile seizures
SCN2A	ClinVar & HGMD	2-166210789-C-A	Not Qualified - Insufficient Evidence	Pathogenic	ENST00000283256.10:c.3007C>A	ENSP00000283256.6:p.Leu1003Ile	15048894	Benign familial neonatal-infantile seizures
SCN2A	HGMD	2-166211165-T-C	Not Qualified - Insufficient Evidence	DM	ENST00000283256.10:c.3383T>C	ENSP00000283256.6:p.Met1128Thr	22591750	Acute encephalitis with refractory repetitive partial seizures
SCN2A	ClinVar	2-166221687-C-T	Not Qualified - Insufficient Evidence	Likely pathogenic	ENST00000283256.10:c.3434C>T	ENSP00000283256.6:p.Thr1145Met	NO ID	not provided
SCN2A	ClinVar	2-166231219-G-A	Not Qualified - Insufficient Evidence	Likely pathogenic	ENST00000283256.10:c.3997G>A	ENSP00000283256.6:p.Ala1333Thr	NO ID	not provided
SCN2A	ClinVar	2-166231235-T-G	Not Qualified - Insufficient Evidence	Likely pathogenic	ENST00000283256.10:c.4013T>G	ENSP00000283256.6:p.Met1338Arg	NO ID	not provided
SCN2A	ClinVar	2-166231281-C-G	Not Qualified - Insufficient Evidence	Likely pathogenic	ENST00000283256.10:c.4059C>G	ENSP00000283256.6:p.Ile1353Met	NO ID	not provided
SCN2A	ClinVar	2-166237187-T-G	Not Qualified - Insufficient Evidence	Likely pathogenic	ENST00000283256.10:c.4394T>G	ENSP00000283256.6:p.Leu1465Trp	NO ID	not provided
SCN2A	ClinVar	2-166237619-T-A	Not Qualified - Insufficient Evidence	Likely pathogenic	ENST00000283256.10:c.4463T>A	ENSP00000283256.6:p.Ile1488Asn	NO ID	not provided
SCN2A	HGMD	2-166243295-C-A	Not Qualified - Insufficient Evidence	DM	ENST00000283256.10:c.4591C>A	ENSP00000283256.6:p.Gln1531Lys	25982755	Seizures benign infantile
SCN2A	ClinVar	2-166243455-C-T	Not Qualified - Insufficient Evidence	Likely pathogenic	ENST00000283256.10:c.4751C>T	ENSP00000283256.6:p.Ser1584Phe	NO ID	not provided
SCN2A	HGMD	2-166245202-G-T	Not Qualified - Insufficient Evidence	DM	ENST00000283256.10:c.4886G>T	ENSP00000283256.6:p.Arg1629Leu	23935176	Epileptic encephalopathy early onset
SCN2A	ClinVar	2-166245211-G-A	Not Qualified - Insufficient Evidence	Pathogenic	ENST00000283256.10:c.4895G>A	ENSP00000283256.6:p.Arg1632Lys	NO ID	not provided
SCN2A	ClinVar	2-166245217-G-A	Not Qualified - Insufficient Evidence	Likely pathogenic	ENST00000283256.10:c.4901G>A	ENSP00000283256.6:p.Gly1634Asp	NO ID	not provided
SCN2A	ClinVar	2-166245224-C-G	Not Qualified - Insufficient Evidence	Likely pathogenic	ENST00000283256.10:c.4908C>G	ENSP00000283256.6:p.Ile1636Met	NO ID	not provided
SCN2A	HGMD	2-166245239-A-C	Not Qualified - Insufficient Evidence	DM	ENST00000283256.10:c.4923A>C	ENSP00000283256.6:p.Lys1641Asn	23360469	Seizures benign infantile
SCN2A	HGMD	2-166245693-G-A	Not Qualified - Insufficient Evidence	DM	ENST00000283256.10:c.5377G>A	ENSP00000283256.6:p.Asp1793Asn	21703448	Epilepsy idiopathic
SCN2A	ClinVar	2-166246252-C-T	Not Qualified - Insufficient Evidence	Likely pathogenic	ENST00000283256.10:c.5936C>T	ENSP00000283256.6:p.Thr1979Ile	NO ID	not provided
SCN2A	HGMD	2-166164367-T-A	Not Qualified - Inaccessible	DM	ENST00000283256.10:c.396T>A	ENSP00000283256.6:p.Asn132Lys	24659627	Epileptic encephalopathy early onset
SCN8A	ClinVar & HGMD	12-52180374-C-G	Qualified - Mosaic in literature	Pathogenic	ENST00000354534.10:c.3991C>G	ENSP00000346534.4:p.Leu1331Val	23708187	Early infantile epileptic encephalopathy 13
SCN8A	HGMD	12-52082555-T-C	Qualified - De novo in literature	DM	ENST00000354534.10:c.628T>C	ENSP00000346534.4:p.Phe210Leu	25818041	Epileptic encephalopathy
SCN8A	HGMD	12-52082568-G-A	Qualified - De novo in literature	DM	ENST00000354534.10:c.641G>A	ENSP00000346534.4:p.Gly214Asp	23934111	Infantile spasms
SCN8A	HGMD	12-52082570-A-G	Qualified - De novo in literature	DM	ENST00000354534.10:c.643A>G	ENSP00000346534.4:p.Asn215Asp	25568300	Epileptic encephalopathy
SCN8A	HGMD	12-52082574-T-A	Qualified - De novo in literature	DM	ENST00000354534.10:c.647T>A	ENSP00000346534.4:p.Val216Asp	24888894	Epileptic encephalopathy infantile
SCN8A	ClinVar & HGMD	12-52082594-A-G	Qualified - De novo in literature	Pathogenic	ENST00000354534.10:c.667A>G	ENSP00000346534.4:p.Arg223Gly	25239001	Early infantile epileptic encephalopathy 13
SCN8A	HGMD	12-52093426-T-C	Qualified - De novo in literature	DM	ENST00000354534.10:c.779T>C	ENSP00000346534.4:p.Phe260Ser	25568300	Epileptic encephalopathy
SCN8A	HGMD	12-52099287-G-C	Qualified - De novo in literature	DM	ENST00000354534.10:c.1221G>C	ENSP00000346534.4:p.Leu407Phe	25785782	Intellectual disability and epilepsy
SCN8A	HGMD	12-52099294-G-C	Qualified - De novo in literature	DM	ENST00000354534.10:c.1228G>C	ENSP00000346534.4:p.Val410Leu	25568300	Epileptic encephalopathy
SCN8A	HGMD	12-52159534-T-A	Qualified - De novo in literature	DM	ENST00000354534.10:c.2624T>A	ENSP00000346534.4:p.Leu875Gln	23934111	Lennox-Gastaut syndrome
SCN8A	HGMD	12-52159578-G-A	Qualified - De novo in literature	DM	ENST00000354534.10:c.2668G>A	ENSP00000346534.4:p.Ala890Thr	25568300	Epileptic encephalopathy
SCN8A	HGMD	12-52159789-T-A	Qualified - De novo in literature	DM	ENST00000354534.10:c.2879T>A	ENSP00000346534.4:p.Val960Asp	25568300	Epileptic encephalopathy
SCN8A	HGMD	12-52162699-C-G	Qualified - De novo in literature	DM	ENST00000354534.10:c.2952C>G	ENSP00000346534.4:p.Asn984Lys	25725044	Intellectual disability and epilepsy
SCN8A	HGMD	12-52180362-A-G	Qualified - De novo in literature	DM	ENST00000354534.10:c.3979A>G	ENSP00000346534.4:p.Ile1327Val	24352161	Epileptic encephalopathy multiple congenital anomalies and movement disorders
SCN8A	ClinVar & HGMD	12-52183134-G-A	Qualified - De novo in literature	Pathogenic	ENST00000354534.10:c.4351G>A	ENSP00000346534.4:p.Gly1451Ser	25725044	Intellectual disability and epilepsy
SCN8A	ClinVar & HGMD	12-52183180-A-C	Qualified - De novo in literature	Pathogenic	ENST00000354534.10:c.4397A>C	ENSP00000346534.4:p.Asn1466Thr	24888894	Early infantile epileptic encephalopathy 13
SCN8A	ClinVar & HGMD	12-52183181-C-A	Qualified - De novo in literature	Pathogenic	ENST00000354534.10:c.4398C>A	ENSP00000346534.4:p.Asn1466Lys	24888894	Early infantile epileptic encephalopathy 13
SCN8A	ClinVar & HGMD	12-52184197-A-G	Qualified - De novo in literature	Likely pathogenic	ENST00000354534.10:c.4435A>G	ENSP00000346534.4:p.Ile1479Val	NO ID	Epileptic encephalopathy
SCN8A	ClinVar & HGMD	12-52188404-G-C	Qualified - De novo in literature	Likely pathogenic	ENST00000354534.10:c.4774G>C	ENSP00000346534.4:p.Val1592Leu	18414213	Early infantile epileptic encephalopathy 13
SCN8A	HGMD	12-52188417-C-G	Qualified - De novo in literature	DM	ENST00000354534.10:c.4787C>G	ENSP00000346534.4:p.Ser1596Cys	25785782	Intellectual disability and epilepsy
SCN8A	HGMD	12-52200084-T-G	Qualified - De novo in literature	DM	ENST00000354534.10:c.4814T>G	ENSP00000346534.4:p.Ile1605Arg	25568300	Epileptic encephalopathy
SCN8A	HGMD	12-52200132-T-G	Qualified - De novo in literature	DM	ENST00000354534.10:c.4862T>G	ENSP00000346534.4:p.Leu1621Trp	26235738	Intellectual disability and epilepsy
SCN8A	HGMD	12-52200205-G-A	Qualified - De novo in literature	DM	ENST00000354534.10:c.4935G>A	ENSP00000346534.4:p.Met1645Ile	26544041	Partial seizures with intellectual / developmental disabilities
SCN8A	HGMD	12-52200218-G-A	Qualified - De novo in literature	DM	ENST00000354534.10:c.4948G>A	ENSP00000346534.4:p.Ala1650Thr	24888894	Epileptic encephalopathy infantile
SCN8A	ClinVar & HGMD	12-52200572-A-G	Qualified - De novo in literature	Pathogenic	ENST00000354534.10:c.5302A>G	ENSP00000346534.4:p.Asn1768Asp	22365152	Early infantile epileptic encephalopathy 13
SCN8A	HGMD	12-52200671-C-G	Qualified - De novo in literature	DM	ENST00000354534.10:c.5401C>G	ENSP00000346534.4:p.Gln1801Glu	25568300	Epileptic encephalopathy
SCN8A	HGMD	12-52200880-A-T	Qualified - De novo in literature	DM	ENST00000354534.10:c.5610A>T	ENSP00000346534.4:p.Glu1870Asp	26252990	Epilepsy
SCN8A	ClinVar & HGMD	12-52200884-C-T	Qualified - De novo in literature	Likely pathogenic	ENST00000354534.10:c.5614C>T	ENSP00000346534.4:p.Arg1872Trp	NO ID	Epileptic encephalopathy infantile
SCN8A	HGMD	12-52200885-G-A	Qualified - De novo in literature	DM	ENST00000354534.10:c.5615G>A	ENSP00000346534.4:p.Arg1872Gln	25568300	Epileptic encephalopathy
SCN8A	ClinVar & HGMD	12-52145307-C-T	Qualified - ClinVar "de novo"	Pathogenic	ENST00000354534.10:c.2300C>T	ENSP00000346534.4:p.Thr767Ile	24194747	Epileptic encephalopathy
SCN8A	ClinVar & HGMD	12-52159459-G-A	Qualified - ClinVar "de novo"	Likely pathogenic;Pathogenic	ENST00000354534.10:c.2549G>A	ENSP00000346534.4:p.Arg850Gln	12374766	Early infantile epileptic encephalopathy 13
SCN8A	ClinVar	12-52159585-T-G	Qualified - ClinVar "de novo"	Pathogenic	ENST00000354534.10:c.2675T>G	ENSP00000346534.4:p.Val892Gly	23708187	N/A
SCN8A	ClinVar	12-52180338-G-T	Qualified - ClinVar "de novo"	Pathogenic	ENST00000354534.10:c.3955G>T	ENSP00000346534.4:p.Ala1319Ser	NO ID	not provided
SCN8A	ClinVar	12-52184234-C-T	Qualified - ClinVar "de novo"	Likely pathogenic	ENST00000354534.10:c.4472C>T	ENSP00000346534.4:p.Ala1491Val	NO ID	not provided
SCN8A	ClinVar	12-52200219-C-T	Qualified - ClinVar "de novo"	Pathogenic	ENST00000354534.10:c.4949C>T	ENSP00000346534.4:p.Ala1650Val	NO ID	not provided
SCN8A	ClinVar	12-52200885-G-T	Qualified - ClinVar "de novo"	Pathogenic	ENST00000354534.10:c.5615G>T	ENSP00000346534.4:p.Arg1872Leu	NO ID	not provided
SCN8A	ClinVar	12-52081003-C-A	Not Qualified - Insufficient Evidence	Likely pathogenic	ENST00000354534.10:c.614C>A	ENSP00000346534.4:p.Ala205Glu	NO ID	not provided
SCN8A	ClinVar	12-52096663-A-G	Not Qualified - Insufficient Evidence	Likely pathogenic	ENST00000354534.10:c.1099A>G	ENSP00000346534.4:p.Met367Val	NO ID	not provided
SCN8A	ClinVar	12-52156450-C-T	Not Qualified - Insufficient Evidence	Likely pathogenic	ENST00000354534.10:c.2534C>T	ENSP00000346534.4:p.Ser845Phe	NO ID	not provided
SCN8A	HGMD	12-52156453-T-C	Not Qualified - Insufficient Evidence	DM	ENST00000354534.10:c.2537T>C	ENSP00000346534.4:p.Phe846Ser	24888894	Migrating partial seizures of infancy
SCN8A	ClinVar	12-52159552-T-C	Not Qualified - Insufficient Evidence	Likely pathogenic	ENST00000354534.10:c.2642T>C	ENSP00000346534.4:p.Val881Ala	NO ID	not provided
SCN8A	ClinVar	12-52184185-G-A	Not Qualified - Insufficient Evidence	Likely pathogenic	ENST00000354534.10:c.4423G>A	ENSP00000346534.4:p.Gly1475Arg	NO ID	not provided
SCN8A	ClinVar	12-52184204-T-A	Not Qualified - Insufficient Evidence	Likely pathogenic	ENST00000354534.10:c.4442T>A	ENSP00000346534.4:p.Met1481Lys	NO ID	not provided
SCN8A	ClinVar	12-52200129-G-T	Not Qualified - Insufficient Evidence	Pathogenic	ENST00000354534.10:c.4859G>T	ENSP00000346534.4:p.Arg1620Leu	25356970	N/A
SCN8A	ClinVar	12-52200159-T-C	Not Qualified - Insufficient Evidence	Pathogenic	ENST00000354534.10:c.4889T>C	ENSP00000346534.4:p.Leu1630Pro	NO ID	not provided
SCN8A	ClinVar	12-52200546-A-G	Not Qualified - Insufficient Evidence	Likely pathogenic	ENST00000354534.10:c.5276A>G	ENSP00000346534.4:p.Asn1759Ser	NO ID	N/A
SCN8A	ClinVar	12-52200825-C-T	Not Qualified - Insufficient Evidence	Likely pathogenic	ENST00000354534.10:c.5555C>T	ENSP00000346534.4:p.Thr1852Ile	NO ID	not provided
SLC2A1	ClinVar & HGMD	1-43394882-G-A	Qualified - Sufficient Segregation Support	Pathogenic	ENST00000426263.7:c.971C>T	ENSP00000416293.2:p.Ser324Leu	NO ID	Glucose transporter 1 deficiency syndrome
SLC2A1	ClinVar & HGMD	1-43395589-G-A	Qualified - Sufficient Segregation Support	Pathogenic	ENST00000426263.7:c.634C>T	ENSP00000416293.2:p.Arg212Cys	21832227	Glucose transporter 1 deficiency syndrome
SLC2A1	HGMD	1-43396720-C-G	Qualified - Sufficient Segregation Support	DM	ENST00000426263.7:c.272G>C	ENSP00000416293.2:p.Gly91Ala	22437877	Glucose transporter 1 deficiency syndrome
SLC2A1	HGMD	1-43392737-G-A	Qualified - De novo in literature	DM	ENST00000426263.7:c.1454C>T	ENSP00000416293.2:p.Pro485Leu	19237265	Glucose transporter 1 deficiency syndrome
SLC2A1	HGMD	1-43393355-C-A	Qualified - De novo in literature	DM	ENST00000426263.7:c.1199G>T	ENSP00000416293.2:p.Arg400Leu	21865127	Glucose transporter 1 deficiency syndrome
SLC2A1	HGMD	1-43393355-C-T	Qualified - De novo in literature	DM	ENST00000426263.7:c.1199G>A	ENSP00000416293.2:p.Arg400His	21555602	Myoclonic astatic epilepsy
SLC2A1	ClinVar & HGMD	1-43393356-G-A	Qualified - De novo in literature	Pathogenic	ENST00000426263.7:c.1198C>T	ENSP00000416293.2:p.Arg400Cys	NO ID	Glucose transporter 1 deficiency syndrome
SLC2A1	HGMD	1-43393406-G-T	Qualified - De novo in literature	DM	ENST00000426263.7:c.1148C>A	ENSP00000416293.2:p.Pro383His	22704013	Glucose transporter 1 deficiency syndrome
SLC2A1	ClinVar & HGMD	1-43394680-G-A	Qualified - De novo in literature	Pathogenic	ENST00000426263.7:c.997C>T	ENSP00000416293.2:p.Arg333Trp	10980529	Glucose transporter type 1 deficiency syndrome
SLC2A1	HGMD	1-43394924-G-T	Qualified - De novo in literature	DM	ENST00000426263.7:c.929C>A	ENSP00000416293.2:p.Thr310Asn	26193382	Glucose transporter 1 deficiency syndrome
SLC2A1	HGMD	1-43395403-T-A	Qualified - De novo in literature	DM	ENST00000426263.7:c.728A>T	ENSP00000416293.2:p.Glu243Val	23280796	Epilepsy idiopathic generalised
SLC2A1	ClinVar & HGMD	1-43395556-G-A	Qualified - De novo in literature	Pathogenic	ENST00000426263.7:c.667C>T	ENSP00000416293.2:p.Arg223Trp	NO ID	Glucose transporter 1 deficiency syndrome
SLC2A1	HGMD	1-43395582-A-G	Qualified - De novo in literature	DM	ENST00000426263.7:c.641T>C	ENSP00000416293.2:p.Leu214Pro	26537434	Absence epilepsy early-onset
SLC2A1	HGMD	1-43396320-C-T	Qualified - De novo in literature	DM	ENST00000426263.7:c.493G>A	ENSP00000416293.2:p.Val165Ile	20621801	Paroxysmal dyskinesia exertion-induced epilepsy & migraine
SLC2A1	HGMD	1-43396337-A-C	Qualified - De novo in literature	DM	ENST00000426263.7:c.476T>G	ENSP00000416293.2:p.Leu159Arg	23106342	Absence epilepsy early-onset
SLC2A1	HGMD	1-43396356-G-A	Qualified - De novo in literature	DM	ENST00000426263.7:c.457C>T	ENSP00000416293.2:p.Arg153Cys	12325075	Glucose transporter 1 deficiency syndrome
SLC2A1	HGMD	1-43396388-A-T	Qualified - De novo in literature	DM	ENST00000426263.7:c.425T>A	ENSP00000416293.2:p.Met142Lys	26193382	Glucose transporter 1 deficiency syndrome
SLC2A1	HGMD	1-43396395-C-T	Qualified - De novo in literature	DM	ENST00000426263.7:c.418G>A	ENSP00000416293.2:p.Val140Met	18577546	Paroxysmal dyskinesia exertion-induced & epilepsy
SLC2A1	HGMD	1-43396425-C-T	Qualified - De novo in literature	DM	ENST00000426263.7:c.388G>A	ENSP00000416293.2:p.Gly130Ser	15622525	Glucose transporter 1 deficiency syndrome
SLC2A1	ClinVar & HGMD	1-43396437-G-A	Qualified - De novo in literature	Pathogenic	ENST00000426263.7:c.376C>T	ENSP00000416293.2:p.Arg126Cys	12325075	Glucose transporter 1 deficiency syndrome
SLC2A1	HGMD	1-43396756-C-T	Qualified - De novo in literature	DM	ENST00000426263.7:c.236G>A	ENSP00000416293.2:p.Gly79Asp	26193382	Glucose transporter 1 deficiency syndrome
SLC2A1	HGMD	1-43408904-G-C	Qualified - De novo in literature	DM	ENST00000426263.7:c.107C>G	ENSP00000416293.2:p.Pro36Arg	25564316	Glucose transporter 1 deficiency syndrome
SLC2A1	ClinVar & HGMD	1-43408910-T-A	Qualified - De novo in literature	Pathogenic	ENST00000426263.7:c.101A>T	ENSP00000416293.2:p.Asn34Ile	14605501	Glucose transporter 1 deficiency syndrome
SLC2A1	HGMD	1-43408910-T-C	Qualified - De novo in literature	DM	ENST00000426263.7:c.101A>G	ENSP00000416293.2:p.Asn34Ser	15622525	Glucose transporter 1 deficiency syndrome
SLC2A1	HGMD	1-43408917-C-G	Qualified - De novo in literature	DM	ENST00000426263.7:c.94G>C	ENSP00000416293.2:p.Val32Leu	26193382	Glucose transporter 1 deficiency syndrome
SLC2A1	HGMD	1-43408943-G-A	Qualified - De novo in literature	DM	ENST00000426263.7:c.68C>T	ENSP00000416293.2:p.Ser23Phe	26193382	Glucose transporter 1 deficiency syndrome
SLC2A1	HGMD	1-43408970-A-G	Qualified - De novo in literature	DM	ENST00000426263.7:c.41T>C	ENSP00000416293.2:p.Leu14Pro	21366555	Glucose transporter 1 deficiency syndrome
SLC2A1	ClinVar	1-43393397-A-C	Qualified - ClinVar "de novo"	Likely pathogenic	ENST00000426263.7:c.1157T>G	ENSP00000416293.2:p.Ile386Ser	NO ID	not provided
SLC2A1	ClinVar	1-43394695-C-A	Qualified - ClinVar "de novo"	Likely pathogenic	ENST00000426263.7:c.982G>T	ENSP00000416293.2:p.Val328Leu	NO ID	not provided
SLC2A1	ClinVar	1-43394915-G-A	Qualified - ClinVar "de novo"	Likely pathogenic	ENST00000426263.7:c.938C>T	ENSP00000416293.2:p.Ser313Phe	NO ID	N/A
SLC2A1	ClinVar	1-43395283-T-C	Qualified - ClinVar "de novo"	Pathogenic	ENST00000426263.7:c.848A>G	ENSP00000416293.2:p.Gln283Arg	NO ID	not provided
SLC2A1	ClinVar & HGMD	1-43392789-G-A	Not Qualified - Recessive	Pathogenic	ENST00000426263.7:c.1402C>T	ENSP00000416293.2:p.Arg468Trp	20221955	Glut1 deficiency syndrome 1, autosomal recessive
SLC2A1	ClinVar & HGMD	1-43396436-C-A	Not Qualified - Recessive	Pathogenic	ENST00000426263.7:c.377G>T	ENSP00000416293.2:p.Arg126Leu	11102982	Glut1 deficiency syndrome 1, autosomal recessive
SLC2A1	HGMD	1-43393304-A-G	Not Qualified - Insufficient Evidence	DM	ENST00000426263.7:c.1250T>C	ENSP00000416293.2:p.Ile417Thr	26193382	Glucose transporter 1 deficiency syndrome
SLC2A1	ClinVar	1-43393338-C-T	Not Qualified - Insufficient Evidence	Likely pathogenic	ENST00000426263.7:c.1216G>A	ENSP00000416293.2:p.Val406Ile	NO ID	not provided
SLC2A1	HGMD	1-43393340-G-T	Not Qualified - Insufficient Evidence	DM	ENST00000426263.7:c.1214C>A	ENSP00000416293.2:p.Ala405Asp	20129935	Glucose transporter 1 deficiency syndrome
SLC2A1	HGMD	1-43393409-C-T	Not Qualified - Insufficient Evidence	DM	ENST00000426263.7:c.1145G>A	ENSP00000416293.2:p.Gly382Asp	20129935	Glucose transporter 1 deficiency syndrome
SLC2A1	HGMD	1-43394646-A-G	Not Qualified - Insufficient Evidence	DM	ENST00000426263.7:c.1031T>C	ENSP00000416293.2:p.Met344Thr	22011817	Glucose transporter 1 deficiency syndrome
SLC2A1	HGMD	1-43394692-C-G	Not Qualified - Insufficient Evidence	DM	ENST00000426263.7:c.985G>C	ENSP00000416293.2:p.Glu329Gln	20129935	Glucose transporter 1 deficiency syndrome
SLC2A1	HGMD	1-43394903-T-G	Not Qualified - Insufficient Evidence	DM	ENST00000426263.7:c.950A>C	ENSP00000416293.2:p.Asn317Thr	18577546	Paroxysmal dyskinesia exertion-induced & epilepsy
SLC2A1	HGMD	1-43394924-G-A	Not Qualified - Insufficient Evidence	DM	ENST00000426263.7:c.929C>T	ENSP00000416293.2:p.Thr310Ile	10590023	Glucose transporter 1 deficiency syndrome
SLC2A1	HGMD	1-43394946-C-A	Not Qualified - Insufficient Evidence	DM	ENST00000426263.7:c.907G>T	ENSP00000416293.2:p.Val303Leu	20129935	Glucose transporter 1 deficiency syndrome
SLC2A1	ClinVar & HGMD	1-43394969-G-A	Not Qualified - Insufficient Evidence	Pathogenic	ENST00000426263.7:c.884C>T	ENSP00000416293.2:p.Thr295Met	25741868	Glucose transporter 1 deficiency syndrome
SLC2A1	HGMD	1-43394973-A-G	Not Qualified - Insufficient Evidence	DM	ENST00000426263.7:c.880T>C	ENSP00000416293.2:p.Ser294Pro	20830593	Glucose transporter 1 deficiency syndrome
SLC2A1	ClinVar & HGMD	1-43395326-G-A	Not Qualified - Insufficient Evidence	Likely pathogenic	ENST00000426263.7:c.805C>T	ENSP00000416293.2:p.Arg269Cys	NO ID	Glucose transporter 1 deficiency syndrome
SLC2A1	ClinVar	1-43395386-G-A	Not Qualified - Insufficient Evidence	Likely pathogenic	ENST00000426263.7:c.745C>T	ENSP00000416293.2:p.Arg249Trp	NO ID	not provided
SLC2A1	ClinVar	1-43395424-T-A	Not Qualified - Insufficient Evidence	Likely pathogenic	ENST00000426263.7:c.707A>T	ENSP00000416293.2:p.Asp236Val	NO ID	not provided
SLC2A1	HGMD	1-43395436-C-T	Not Qualified - Insufficient Evidence	DM	ENST00000426263.7:c.695G>A	ENSP00000416293.2:p.Arg232His	26537434	Absence epilepsy early-onset
SLC2A1	HGMD	1-43395570-C-T	Not Qualified - Insufficient Evidence	DM	ENST00000426263.7:c.653G>A	ENSP00000416293.2:p.Arg218His	16217704	Glucose transporter 1 deficiency syndrome
SLC2A1	HGMD	1-43395571-G-T	Not Qualified - Insufficient Evidence	DM	ENST00000426263.7:c.652C>A	ENSP00000416293.2:p.Arg218Ser	23280796	Epilepsy idiopathic generalised
SLC2A1	HGMD	1-43395580-G-A	Not Qualified - Insufficient Evidence	DM	ENST00000426263.7:c.643C>T	ENSP00000416293.2:p.Leu215Phe	23106342	Absence epilepsy early-onset
SLC2A1	HGMD	1-43395588-C-T	Not Qualified - Insufficient Evidence	DM	ENST00000426263.7:c.635G>A	ENSP00000416293.2:p.Arg212His	16217704	Glucose transporter 1 deficiency syndrome
SLC2A1	ClinVar	1-43395592-G-A	Not Qualified - Insufficient Evidence	Likely pathogenic	ENST00000426263.7:c.631C>T	ENSP00000416293.2:p.Pro211Ser	NO ID	not provided
SLC2A1	HGMD	1-43395596-C-G	Not Qualified - Insufficient Evidence	DM	ENST00000426263.7:c.627G>C	ENSP00000416293.2:p.Glu209Asp	23106342	Absence epilepsy early-onset
SLC2A1	HGMD	1-43395634-C-G	Not Qualified - Insufficient Evidence	DM	ENST00000426263.7:c.589G>C	ENSP00000416293.2:p.Ala197Pro	26193382	Glucose transporter 1 deficiency syndrome
SLC2A1	HGMD	1-43396307-A-G	Not Qualified - Insufficient Evidence	DM	ENST00000426263.7:c.506T>C	ENSP00000416293.2:p.Leu169Pro	21649651	Glucose transporter 1 deficiency syndrome
SLC2A1	HGMD	1-43396349-G-A	Not Qualified - Insufficient Evidence	DM	ENST00000426263.7:c.464C>T	ENSP00000416293.2:p.Ala155Val	20129935	Glucose transporter 1 deficiency syndrome
SLC2A1	HGMD	1-43396353-C-T	Not Qualified - Insufficient Evidence	DM	ENST00000426263.7:c.460G>A	ENSP00000416293.2:p.Gly154Arg	26385057	Glucose transporter 1 deficiency syndrome
SLC2A1	ClinVar & HGMD	1-43396355-C-A	Not Qualified - Insufficient Evidence	Pathogenic	ENST00000426263.7:c.458G>T	ENSP00000416293.2:p.Arg153Leu	NO ID	Glucose transporter 1 deficiency syndrome
SLC2A1	HGMD	1-43396368-G-C	Not Qualified - Insufficient Evidence	DM	ENST00000426263.7:c.445C>G	ENSP00000416293.2:p.Pro149Ala	23280796	Epilepsy idiopathic generalised
SLC2A1	HGMD	1-43396370-G-A	Not Qualified - Insufficient Evidence	DM	ENST00000426263.7:c.443C>T	ENSP00000416293.2:p.Ser148Leu	26193382	Glucose transporter 1 deficiency syndrome
SLC2A1	ClinVar	1-43396377-C-G	Not Qualified - Insufficient Evidence	Pathogenic	ENST00000426263.7:c.436G>C	ENSP00000416293.2:p.Glu146Gln	NO ID	not provided
SLC2A1	HGMD	1-43396377-C-T	Not Qualified - Insufficient Evidence	DM	ENST00000426263.7:c.436G>A	ENSP00000416293.2:p.Glu146Lys	10980529	Glucose transporter 1 deficiency syndrome
SLC2A1	HGMD	1-43396385-T-C	Not Qualified - Insufficient Evidence	DM	ENST00000426263.7:c.428A>G	ENSP00000416293.2:p.Tyr143Cys	22190371	Glucose transporter 1 deficiency syndrome
SLC2A1	HGMD	1-43396403-G-A	Not Qualified - Insufficient Evidence	DM	ENST00000426263.7:c.410C>T	ENSP00000416293.2:p.Thr137Ile	22190371	Glucose transporter 1 deficiency syndrome
SLC2A1	HGMD	1-43396404-T-C	Not Qualified - Insufficient Evidence	DM	ENST00000426263.7:c.409A>G	ENSP00000416293.2:p.Thr137Ala	21229316	Glucose transporter 1 deficiency syndrome
SLC2A1	ClinVar	1-43396425-C-G	Not Qualified - Insufficient Evidence	Pathogenic	ENST00000426263.7:c.388G>C	ENSP00000416293.2:p.Gly130Arg	NO ID	not provided
SLC2A1	ClinVar & HGMD	1-43396436-C-T	Not Qualified - Insufficient Evidence	Pathogenic	ENST00000426263.7:c.377G>A	ENSP00000416293.2:p.Arg126His	11603379	Glucose transporter type 1 deficiency syndrome
SLC2A1	HGMD	1-43396442-A-C	Not Qualified - Insufficient Evidence	DM	ENST00000426263.7:c.371T>G	ENSP00000416293.2:p.Leu124Arg	22190371	Glucose transporter 1 deficiency syndrome
SLC2A1	HGMD	1-43396527-T-C	Not Qualified - Insufficient Evidence	DM	ENST00000426263.7:c.286A>G	ENSP00000416293.2:p.Met96Val	20129935	Glucose transporter 1 deficiency syndrome
SLC2A1	HGMD	1-43396535-C-T	Not Qualified - Insufficient Evidence	DM	ENST00000426263.7:c.278G>A	ENSP00000416293.2:p.Arg93Gln	22190371	Glucose transporter 1 deficiency syndrome
SLC2A1	ClinVar & HGMD	1-43396720-C-T	Not Qualified - Insufficient Evidence	Pathogenic	ENST00000426263.7:c.272G>A	ENSP00000416293.2:p.Gly91Asp	11136715	Glucose transporter type 1 deficiency syndrome
SLC2A1	HGMD	1-43396762-A-G	Not Qualified - Insufficient Evidence	DM	ENST00000426263.7:c.230T>C	ENSP00000416293.2:p.Met77Thr	23280796	Epilepsy idiopathic generalised
SLC2A1	HGMD	1-43396765-C-G	Not Qualified - Insufficient Evidence	DM	ENST00000426263.7:c.227G>C	ENSP00000416293.2:p.Gly76Ala	25487684	Glucose transporter 1 deficiency syndrome
SLC2A1	HGMD	1-43396769-C-A	Not Qualified - Insufficient Evidence	DM	ENST00000426263.7:c.223G>T	ENSP00000416293.2:p.Gly75Trp	16217704	Glucose transporter 1 deficiency syndrome
SLC2A1	HGMD	1-43396795-G-A	Not Qualified - Insufficient Evidence	DM	ENST00000426263.7:c.197C>T	ENSP00000416293.2:p.Ser66Phe	10590023	Glucose transporter 1 deficiency syndrome
SLC2A1	HGMD	1-43396813-G-A	Not Qualified - Insufficient Evidence	DM	ENST00000426263.7:c.179C>T	ENSP00000416293.2:p.Thr60Met	23280796	Epilepsy idiopathic generalised
SLC2A1	HGMD	1-43396871-C-T	Not Qualified - Insufficient Evidence	DM	ENST00000426263.7:c.121G>A	ENSP00000416293.2:p.Glu41Lys	22011817	Glucose transporter 1 deficiency syndrome
SLC2A1	HGMD	1-43408904-G-A	Not Qualified - Insufficient Evidence	DM	ENST00000426263.7:c.107C>T	ENSP00000416293.2:p.Pro36Leu	22190371	Glucose transporter 1 deficiency syndrome
SLC2A1	HGMD	1-43408904-G-T	Not Qualified - Insufficient Evidence	DM	ENST00000426263.7:c.107C>A	ENSP00000416293.2:p.Pro36His	22190371	Glucose transporter 1 deficiency syndrome
SLC2A1	HGMD	1-43408911-T-A	Not Qualified - Insufficient Evidence	DM	ENST00000426263.7:c.100A>T	ENSP00000416293.2:p.Asn34Tyr	20129935	Glucose transporter 1 deficiency syndrome
SLC2A1	ClinVar	1-43408911-T-C	Not Qualified - Insufficient Evidence	Likely pathogenic	ENST00000426263.7:c.100A>G	ENSP00000416293.2:p.Asn34Asp	18414213	Glucose transporter type 1 deficiency syndrome
SLC2A1	HGMD	1-43408931-C-A	Not Qualified - Insufficient Evidence	DM	ENST00000426263.7:c.80G>T	ENSP00000416293.2:p.Gly27Val	22190371	Glucose transporter 1 deficiency syndrome
SLC2A1	ClinVar	1-43408932-C-T	Not Qualified - Insufficient Evidence	Likely pathogenic	ENST00000426263.7:c.79G>A	ENSP00000416293.2:p.Gly27Ser	NO ID	not provided
STXBP1	HGMD	9-130416031-C-T	Qualified - De novo in literature	DM	ENST00000373299.4:c.125C>T	ENSP00000362396.1:p.Ser42Phe	23708187	Epileptic encephalopathy early onset
STXBP1	HGMD	9-130420714-T-A	Qualified - De novo in literature	DM	ENST00000373299.4:c.230T>A	ENSP00000362396.1:p.Ile77Asn	23409955	Epileptic encephalopathy neonatal
STXBP1	HGMD	9-130420720-C-T	Qualified - De novo in literature	DM	ENST00000373299.4:c.236C>T	ENSP00000362396.1:p.Pro79Leu	26648591	Epileptic encephalopathy early onset
STXBP1	HGMD	9-130420722-T-C	Qualified - De novo in literature	DM	ENST00000373299.4:c.238T>C	ENSP00000362396.1:p.Ser80Pro	23708187	Epileptic encephalopathy
STXBP1	ClinVar & HGMD	9-130422313-T-A	Qualified - De novo in literature	Pathogenic	ENST00000373299.4:c.251T>A	ENSP00000362396.1:p.Val84Asp	18469812	Early infantile epileptic encephalopathy 4
STXBP1	HGMD	9-130422358-A-G	Qualified - De novo in literature	DM	ENST00000373299.4:c.296A>G	ENSP00000362396.1:p.Tyr99Cys	26648591	Epileptic encephalopathy early onset
STXBP1	HGMD	9-130422370-A-C	Qualified - De novo in literature	DM	ENST00000373299.4:c.308A>C	ENSP00000362396.1:p.His103Pro	26514728	Epileptic encephalopathy
STXBP1	ClinVar & HGMD	9-130423471-C-T	Qualified - De novo in literature	Likely pathogenic	ENST00000373299.4:c.416C>T	ENSP00000362396.1:p.Pro139Leu	NO ID	Epileptic encephalopathy early onset
STXBP1	ClinVar & HGMD	9-130425593-G-A	Qualified - De novo in literature	Pathogenic	ENST00000373299.4:c.539G>A	ENSP00000362396.1:p.Cys180Tyr	18469812	Early infantile epileptic encephalopathy 4
STXBP1	HGMD	9-130425602-T-G	Qualified - De novo in literature	DM	ENST00000373299.4:c.548T>G	ENSP00000362396.1:p.Leu183Arg	21770924	Epileptic encephalopathy early infantile
STXBP1	ClinVar & HGMD	9-130425622-C-T	Qualified - De novo in literature	Pathogenic	ENST00000373299.4:c.568C>T	ENSP00000362396.1:p.Arg190Trp	NO ID	Epileptic encephalopathy early onset
STXBP1	HGMD	9-130428515-A-C	Qualified - De novo in literature	DM	ENST00000373299.4:c.734A>C	ENSP00000362396.1:p.His245Pro	26514728	Epileptic encephalopathy
STXBP1	ClinVar	9-130428515-A-G	Qualified - De novo in literature	Likely pathogenic	ENST00000373299.4:c.734A>G	ENSP00000362396.1:p.His245Arg	18414213	Early infantile epileptic encephalopathy 4
STXBP1	HGMD	9-130428532-G-A	Qualified - De novo in literature	DM	ENST00000373299.4:c.751G>A	ENSP00000362396.1:p.Ala251Thr	24170257	Epileptic encephalopathy
STXBP1	ClinVar & HGMD	9-130430411-G-A	Qualified - De novo in literature	Pathogenic	ENST00000373299.4:c.847G>A	ENSP00000362396.1:p.Glu283Lys	24623842	Early infantile epileptic encephalopathy 4
STXBP1	HGMD	9-130430417-G-T	Qualified - De novo in literature	DM	ENST00000373299.4:c.853G>T	ENSP00000362396.1:p.Asp285Tyr	24623842	Dravet syndrome
STXBP1	ClinVar	9-130430438-C-T	Qualified - De novo in literature	Likely pathogenic;Pathogenic	ENST00000373299.4:c.874C>T	ENSP00000362396.1:p.Arg292Cys	25741868	not provided
STXBP1	ClinVar & HGMD	9-130430439-G-A	Qualified - De novo in literature	Pathogenic	ENST00000373299.4:c.875G>A	ENSP00000362396.1:p.Arg292His	NO ID	Infantile spasms
STXBP1	ClinVar	9-130430439-G-T	Qualified - De novo in literature	Pathogenic	ENST00000373299.4:c.875G>T	ENSP00000362396.1:p.Arg292Leu	25356970	N/A
STXBP1	HGMD	9-130435490-T-C	Qualified - De novo in literature	DM	ENST00000373299.4:c.1060T>C	ENSP00000362396.1:p.Cys354Arg	23708187	Ohtahara syndrome
STXBP1	ClinVar	9-130435491-G-A	Qualified - De novo in literature	Pathogenic	ENST00000373299.4:c.1061G>A	ENSP00000362396.1:p.Cys354Tyr	NO ID	not provided
STXBP1	ClinVar & HGMD	9-130438188-C-T	Qualified - De novo in literature	Pathogenic	ENST00000373299.4:c.1216C>T	ENSP00000362396.1:p.Arg406Cys	NO ID	Epileptic encephalopathy early onset
STXBP1	HGMD	9-130438189-G-A	Qualified - De novo in literature	DM	ENST00000373299.4:c.1217G>A	ENSP00000362396.1:p.Arg406His	20887364	Epileptic encephalopathy early infantile
STXBP1	ClinVar & HGMD	9-130439001-T-G	Qualified - De novo in literature	Pathogenic	ENST00000373299.4:c.1328T>G	ENSP00000362396.1:p.Met443Arg	18469812	Early infantile epileptic encephalopathy 4
STXBP1	HGMD	9-130439007-A-C	Qualified - De novo in literature	DM	ENST00000373299.4:c.1334A>C	ENSP00000362396.1:p.His445Pro	24623842	Dravet syndrome
STXBP1	ClinVar & HGMD	9-130440789-C-T	Qualified - De novo in literature	Pathogenic	ENST00000373299.4:c.1439C>T	ENSP00000362396.1:p.Pro480Leu	NO ID	Epileptic encephalopathy early infantile
STXBP1	HGMD	9-130444767-G-C	Qualified - De novo in literature	DM	ENST00000373299.4:c.1630G>C	ENSP00000362396.1:p.Gly544Arg	26514728	Epileptic encephalopathy
STXBP1	ClinVar & HGMD	9-130444768-G-A	Qualified - De novo in literature	Pathogenic	ENST00000373299.4:c.1631G>A	ENSP00000362396.1:p.Gly544Asp	18469812	Early infantile epileptic encephalopathy 4
STXBP1	HGMD	9-130444768-G-T	Qualified - De novo in literature	DM	ENST00000373299.4:c.1631G>T	ENSP00000362396.1:p.Gly544Val	23409955	Epileptic encephalopathy neonatal
STXBP1	HGMD	9-130444791-T-C	Qualified - De novo in literature	DM	ENST00000373299.4:c.1654T>C	ENSP00000362396.1:p.Cys552Arg	21204804	West syndrome
STXBP1	ClinVar	9-130444789-G-C	Qualified - ClinVar "de novo"	Pathogenic	ENST00000373299.4:c.1652G>C	ENSP00000362396.1:p.Arg551Pro	NO ID	not provided
STXBP1	ClinVar	9-130416073-C-G	Not Qualified - Insufficient Evidence	Pathogenic	ENST00000373299.4:c.167C>G	ENSP00000362396.1:p.Thr56Arg	NO ID	not provided
STXBP1	ClinVar	9-130420708-A-G	Not Qualified - Insufficient Evidence	Likely pathogenic	ENST00000373299.4:c.224A>G	ENSP00000362396.1:p.Tyr75Cys	NO ID	not provided
STXBP1	ClinVar	9-130425487-T-C	Not Qualified - Insufficient Evidence	Likely pathogenic	ENST00000373299.4:c.433T>C	ENSP00000362396.1:p.Tyr145His	18414213	Early infantile epileptic encephalopathy 4
STXBP1	ClinVar	9-130425623-G-A	Not Qualified - Insufficient Evidence	Pathogenic	ENST00000373299.4:c.569G>A	ENSP00000362396.1:p.Arg190Gln	NO ID	not provided
STXBP1	ClinVar & HGMD	9-130444744-G-A	Not Qualified - Insufficient Evidence	Pathogenic	ENST00000373299.4:c.1607G>A	ENSP00000362396.1:p.Arg536His	NO ID	Epileptic encephalopathy early infantile
STXBP1	HGMD	9-130444767-G-T	Not Qualified - Insufficient Evidence	DM	ENST00000373299.4:c.1630G>T	ENSP00000362396.1:p.Gly544Cys	23708187	Lennox-Gastaut syndrome
STXBP1	ClinVar	9-130444788-C-A	Not Qualified - Insufficient Evidence	Pathogenic	ENST00000373299.4:c.1651C>A	ENSP00000362396.1:p.Arg551Ser	NO ID	not provided
