# Supplementary material for: Optimizing genomic medicine in epilepsy through a gene-customized approach to missense variant interpretation
Source: Genome Res. 2017 Oct;27(10):1715–29. doi: 10.1101/gr.226589.117 (PMC5630035; doi:10.1101/gr.226589.117)
Supplement: Supplemental Material [file supp_gr.226589.117_Supplemental_Data_S2.xlsx]

## Sheet: Data S2
HGNC	Database Source	variant (hg19)	Current Curation	Clinical Significance	HGVS(p.)	Database Phenotype	ESP MAF	1KGP MAF	ExAC MAF	ExACv2 & gnomAD	ExACv2 & gnomAD Allele Count
SCN1A	HGMD	2-166848003-G-C	Not Qualified - Insufficient Evidence	DM	ENSP00000303540.4:p.Arg1928Gly	Myoclonic epilepsy of infancy	0.001461	0.0018	0.0014	0.00127	351
SCN1A	HGMD	2-166866307-T-A	Not Qualified - Insufficient Evidence	DM	ENSP00000303540.4:p.Glu1308Asp	Febrile seizures	0.000615	0.0001997	0.0007549	0.0006416	177
SCN1A	HGMD	2-166848930-T-C	Not Qualified - Insufficient Evidence	DM	ENSP00000303540.4:p.Met1619Val	Intractable epilepsy	7.7e-05	0.000599	0.0005638	0.0005132	126
SCN1A	HGMD	2-166868749-G-A	Not Qualified - Insufficient Evidence	DM	ENSP00000303540.4:p.Thr1250Met	Generalized epilepsy with febrile seizures plus	0.000231	NA	0.0003598	0.0004509	124
SLC2A1	ClinVar & HGMD	1-43395326-G-A	Not Qualified - Insufficient Evidence	Likely pathogenic	ENSP00000416293.2:p.Arg269Cys	Glucose transporter 1 deficiency syndrome	7.7e-05	NA	0.000289	0.000264	73
SCN1A	HGMD	2-166850674-C-T	Not Qualified - Insufficient Evidence	DM	ENSP00000303540.4:p.Val1612Ile	Dravet syndrome	NA	NA	0.0002102	0.0001683	46
SLC2A1	ClinVar	1-43393338-C-T	Not Qualified - Insufficient Evidence	Likely pathogenic	ENSP00000416293.2:p.Val406Ile	not provided	0.000231	0.000599	0.000165	0.0001047	29
SLC2A1	HGMD	1-43395570-C-T	Not Qualified - Insufficient Evidence	DM	ENSP00000416293.2:p.Arg218His	Glucose transporter 1 deficiency syndrome	NA	NA	3.296e-05	7.216e-05	20
SLC2A1	HGMD	1-43393304-A-G	Not Qualified - Insufficient Evidence	DM	ENSP00000416293.2:p.Ile417Thr	Glucose transporter 1 deficiency syndrome	7.7e-05	NA	5.773e-05	4.7e-05	13
GRIN2A	HGMD	16-10031940-C-T	Not Qualified - Insufficient Evidence	DM	ENSP00000379818.2:p.Gly295Ser	Rolandic epilepsy	NA	0.0001997	5.777e-05	4.887e-05	12
SCN1A	HGMD	2-166868784-T-G	Not Qualified - Insufficient Evidence	DM	ENSP00000303540.4:p.Glu1238Asp	Myoclonic epilepsy of infancy	NA	0.0001997	2.903e-05	4.548e-05	11
SCN1A	ClinVar & HGMD	2-166930050-G-A	Not Qualified - Insufficient Evidence	Pathogenic	ENSP00000303540.4:p.Arg28Cys	Generalized epilepsy with febrile seizures plus	NA	NA	3.295e-05	3.248e-05	9
SLC2A1	HGMD	1-43396813-G-A	Not Qualified - Insufficient Evidence	DM	ENSP00000416293.2:p.Thr60Met	Epilepsy idiopathic generalised	7.7e-05	NA	2.473e-05	3.248e-05	9
SCN1A	ClinVar	2-166898843-C-T	Not Qualified - Insufficient Evidence	Likely pathogenic	ENSP00000303540.4:p.Arg712Gln	not provided	0.000154	NA	4.944e-05	3.252e-05	8
SCN1A	HGMD	2-166850896-C-T	Not Qualified - Insufficient Evidence	DM	ENSP00000303540.4:p.Val1538Ile	Dravet syndrome	NA	NA	2.49e-05	2.541e-05	7
SCN1A	ClinVar	2-166908402-A-G	Not Qualified - Insufficient Evidence	Likely pathogenic	ENSP00000303540.4:p.Ile264Thr	not provided	NA	NA	8.266e-06	1.809e-05	5
SCN1A	HGMD	2-166850880-A-G	Not Qualified - Insufficient Evidence	DM	ENSP00000303540.4:p.Phe1543Ser	Cryptogenic focal epilepsy	NA	NA	1.658e-05	2.042e-05	5
SCN1A	HGMD	2-166859170-C-T	Not Qualified - Insufficient Evidence	DM	ENSP00000303540.4:p.Val1366Ile	Generalized epilepsy with febrile seizures plus	NA	0.0001997	8.279e-06	2.041e-05	5
SCN1A	HGMD	2-166870321-C-T	Not Qualified - Insufficient Evidence	DM	ENSP00000303540.4:p.Arg1213Gln	Intractable epilepsy	NA	0.0001997	4.133e-05	2.036e-05	5
SCN2A	ClinVar & HGMD	2-166165261-C-T	Not Qualified - Insufficient Evidence	Pathogenic	ENSP00000283256.6:p.Arg188Trp	Benign familial neonatal-infantile seizures	7.7e-05	NA	2.483e-05	2.033e-05	5
GRIN2A	HGMD	16-9862862-A-G	Not Qualified - Insufficient Evidence	DM	ENSP00000379818.2:p.Ile814Thr	Benign epilepsy with centrotemporal spikes	NA	NA	8.24e-06	1.444e-05	4
SLC2A1	HGMD	1-43396527-T-C	Not Qualified - Insufficient Evidence	DM	ENSP00000416293.2:p.Met96Val	Glucose transporter 1 deficiency syndrome	NA	NA	1.674e-05	1.27e-05	3
GRIN2A	HGMD	16-9858474-T-C	Not Qualified - Insufficient Evidence	DM	ENSP00000379818.2:p.Asn976Ser	Epileptic encephalopathy	NA	NA	NA	8.129e-06	2
KCNT1	ClinVar & HGMD	9-138671257-C-T	Qualified - Sufficient Segregation Support	Pathogenic	ENSP00000360822.2:p.Arg928Cys	Epilepsy, nocturnal frontal lobe, 5	NA	NA	1.651e-05	8.123e-06	2
SCN1A	ClinVar & HGMD	2-166895946-C-T	Not Qualified - Insufficient Evidence	Pathogenic	ENSP00000303540.4:p.Arg859His	Severe myoclonic epilepsy in infancy	NA	NA	NA	8.153e-06	2
SCN1A	HGMD	2-166894546-C-T	Not Qualified - Insufficient Evidence	DM	ENSP00000303540.4:p.Val896Ile	Dravet syndrome	NA	NA	8.238e-06	8.124e-06	2
SLC2A1	HGMD	1-43394946-C-A	Not Qualified - Insufficient Evidence	DM	ENSP00000416293.2:p.Val303Leu	Glucose transporter 1 deficiency syndrome	NA	NA	NA	7.237e-06	2
SLC2A1	HGMD	1-43395436-C-T	Not Qualified - Insufficient Evidence	DM	ENSP00000416293.2:p.Arg232His	Absence epilepsy early-onset	7.7e-05	NA	8.239e-06	8.122e-06	2
STXBP1	ClinVar & HGMD	9-130444744-G-A	Not Qualified - Insufficient Evidence	Pathogenic	ENSP00000362396.1:p.Arg536His	Epileptic encephalopathy early infantile	NA	NA	8.259e-06	7.216e-06	2
GRIN2A	ClinVar & HGMD	16-9916143-C-T	Not Qualified - Insufficient Evidence	Likely pathogenic	ENSP00000379818.2:p.Ala716Thr	Atypical rolandic epilepsy verbal dyspraxia	NA	NA	8.244e-06	4.065e-06	1
GRIN2A	ClinVar	16-9934603-G-A	Not Qualified - Insufficient Evidence	Likely pathogenic	ENSP00000379818.2:p.Arg518Cys	not provided	NA	NA	8.255e-06	4.072e-06	1
GRIN2A	HGMD	16-10274033-G-C	Qualified - Sufficient Segregation Support	DM	ENSP00000379818.2:p.Pro79Arg	Epileptic encephalopathy	NA	NA	NA	4.071e-06	1
GRIN2A	HGMD	16-9984857-G-A	Not Qualified - Insufficient Evidence	DM	ENSP00000379818.2:p.Arg370Trp	Benign epilepsy with centrotemporal spikes	NA	NA	8.241e-06	4.064e-06	1
KCNQ2	ClinVar & HGMD	20-62070003-C-T	Not Qualified - Insufficient Evidence	Pathogenic	ENSP00000352035.2:p.Arg333Gln	Benign familial neonatal seizures 1	NA	NA	NA	4.063e-06	1
KCNQ2	ClinVar & HGMD	20-62073782-C-T	Qualified - ClinVar "de novo"	Likely pathogenic;Pathogenic	ENSP00000352035.2:p.Ala265Thr	Benign familial neonatal seizures 1	NA	NA	NA	4.061e-06	1
KCNQ2	ClinVar & HGMD	20-62044909-G-A	Qualified - ClinVar "de novo"	Pathogenic	ENSP00000352035.2:p.Arg553Trp	Ohtahara/West syndrome	NA	NA	8.307e-06	4.065e-06	1
KCNT1	HGMD	9-138651688-G-A	Not Qualified - Insufficient Evidence	DM	ENSP00000360822.2:p.Val340Met	Malignant migrating partial seizures in infancy	NA	NA	NA	4.157e-06	1
PCDH19	HGMD	X-99663025-C-G	Not Qualified - Insufficient Evidence	DM	ENSP00000362125.4:p.Val191Leu	Epilepsy and mental retardation limited to females	NA	NA	1.156e-05	5.714e-06	1
SCN1A	ClinVar & HGMD	2-166904177-C-T	Not Qualified - Insufficient Evidence	Likely pathogenic;Pathogenic	ENSP00000303540.4:p.Arg377Gln	Severe myoclonic epilepsy in infancy	NA	NA	NA	4.069e-06	1
SCN1A	HGMD	2-166847823-G-A	Not Qualified - Insufficient Evidence	DM	ENSP00000303540.4:p.Arg1988Trp	Epilepsy-aphasia with febrile seizures plus	NA	NA	8.278e-06	4.073e-06	1
SCN1A	HGMD	2-166848851-C-T	Qualified - SCN1A databases support "de novo"	DM	ENSP00000303540.4:p.Arg1645Gln	Myoclonic epilepsy of infancy	NA	NA	NA	4.063e-06	1
SCN1A	HGMD	2-166854643-G-T	Qualified - SCN1A databases support "de novo"	DM	ENSP00000303540.4:p.Leu1461Ile	Myoclonic epilepsy of infancy	NA	NA	8.326e-06	4.096e-06	1
SCN1A	HGMD	2-166859001-T-C	Qualified - SCN1A databases support "de novo"	DM	ENSP00000303540.4:p.Tyr1422Cys	Myoclonic epilepsy of infancy	NA	NA	NA	4.09e-06	1
SCN1A	HGMD	2-166866306-G-A	Not Qualified - Insufficient Evidence	DM	ENSP00000303540.4:p.Leu1309Phe	Generalized epilepsy with febrile seizures plus	NA	NA	NA	4.081e-06	1
SCN1A	HGMD	2-166892994-T-C	Not Qualified - Insufficient Evidence	DM	ENSP00000303540.4:p.Asp998Gly	Dravet syndrome	NA	NA	NA	4.103e-06	1
SCN1A	HGMD	2-166909421-A-G	Not Qualified - Inaccessible	DM	ENSP00000303540.4:p.Val212Ala	Dravet syndrome	NA	0.0001997	8.519e-06	4.076e-06	1
SCN2A	HGMD	2-166245239-A-C	Not Qualified - Insufficient Evidence	DM	ENSP00000283256.6:p.Lys1641Asn	Seizures benign infantile	NA	NA	8.242e-06	4.063e-06	1
SCN8A	HGMD	12-52200885-G-A	Qualified - De novo in literature	DM	ENSP00000346534.4:p.Arg1872Gln	Epileptic encephalopathy	NA	NA	NA	4.064e-06	1
SLC2A1	HGMD	1-43396535-C-T	Not Qualified - Insufficient Evidence	DM	ENSP00000416293.2:p.Arg93Gln	Glucose transporter 1 deficiency syndrome	NA	NA	NA	4.239e-06	1
SLC2A1	HGMD	1-43396762-A-G	Not Qualified - Insufficient Evidence	DM	ENSP00000416293.2:p.Met77Thr	Epilepsy idiopathic generalised	NA	NA	NA	4.062e-06	1
SLC2A1	HGMD	1-43393355-C-A	Qualified - De novo in literature	DM	ENSP00000416293.2:p.Arg400Leu	Glucose transporter 1 deficiency syndrome	NA	NA	8.269e-06	4.063e-06	1
SLC2A1	HGMD	1-43396871-C-T	Not Qualified - Insufficient Evidence	DM	ENSP00000416293.2:p.Glu41Lys	Glucose transporter 1 deficiency syndrome	NA	NA	8.287e-06	4.08e-06	1
SCN2A	HGMD	2-166211165-T-C	Not Qualified - Insufficient Evidence	DM	ENSP00000283256.6:p.Met1128Thr	Acute encephalitis with refractory repetitive partial seizures	7.7e-05	NA	NA	NA	0
