# Supplementary material for: Optimizing genomic medicine in epilepsy through a gene-customized approach to missense variant interpretation
Source: Genome Res. 2017 Oct;27(10):1715–29. doi: 10.1101/gr.226589.117 (PMC5630035; doi:10.1101/gr.226589.117)
Supplement: Supplemental Material [file supp_gr.226589.117_Supplemental_Data_S3.xlsx]

## Sheet: Data S3
Gene	Transcript	Residue	Minimum Window Residue	Maximum Window Residue	Expected Prop Missense	ExAC Release 0.3.1 (n = 60706 exomes)					ExAC v2 and gnomAD Release 2.0 (n = 138632 exomes)
						Distinct Variants	Observed Prop Missense	Missense Tolerance Ratio (MTR)	Benjamini & Hochberg (FDR)	WES Samples Covered 10x	Distinct Variants	Observed Prop Missense	Missense Tolerance Ratio (MTR)	Benjamini & Hochberg (FDR)	WES Samples Covered 10x
CDKL5	CCDS14186.1	1	1	16	0.810606	3	1	1.23364	1	0.999703	6	0.666667	0.82243	0.423669	0.998633
CDKL5	CCDS14186.1	2	1	17	0.801418	4	0.75	0.935841	0.703675	0.999638	7	0.571429	0.713021	0.233482	0.998733
CDKL5	CCDS14186.1	3	1	18	0.793333	4	0.75	0.945378	1	0.999506	7	0.571429	0.720288	0.248988	0.9988
CDKL5	CCDS14186.1	4	1	19	0.786164	4	0.75	0.954	1	0.999638	7	0.571429	0.726857	0.262391	0.9987
CDKL5	CCDS14186.1	5	1	20	0.779762	4	0.75	0.961832	1	0.999703	7	0.571429	0.732824	0.27652	0.9983
CDKL5	CCDS14186.1	6	1	21	0.784091	4	0.75	0.956522	1	0.999703	7	0.571429	0.728778	0.266801	0.9985
CDKL5	CCDS14186.1	7	1	22	0.777174	4	0.75	0.965035	1	0.999703	7	0.571429	0.735265	0.282373	0.998467
CDKL5	CCDS14186.1	8	1	23	0.772021	4	0.75	0.971477	1	0.999703	7	0.571429	0.740173	0.294653	0.9984
CDKL5	CCDS14186.1	9	1	24	0.775	4	0.75	0.967742	1	0.999703	7	0.571429	0.737327	0.287548	0.9989
CDKL5	CCDS14186.1	10	1	25	0.769231	4	0.75	0.975	1	0.999868	7	0.571429	0.742857	0.30117	0.998967
CDKL5	CCDS14186.1	11	1	26	0.764977	4	0.75	0.980422	1	1	7	0.571429	0.746988	0.473466	0.999033
CDKL5	CCDS14186.1	12	1	27	0.761062	4	0.75	0.985465	1	1	7	0.571429	0.750831	0.475872	0.998967
CDKL5	CCDS14186.1	13	1	28	0.757447	4	0.75	0.990169	1	1	7	0.571429	0.754414	0.478598	0.9989
CDKL5	CCDS14186.1	14	1	29	0.761317	4	0.75	0.985135	1	1	7	0.571429	0.750579	0.47575	0.998967
CDKL5	CCDS14186.1	15	1	30	0.76494	4	0.75	0.980469	1	1	7	0.571429	0.747024	0.473466	0.999133
CDKL5	CCDS14186.1	16	1	31	0.764479	5	0.6	0.784848	0.46551	1	8	0.5	0.65404	0.168878	0.9991
CDKL5	CCDS14186.1	17	2	32	0.768657	5	0.6	0.780583	0.455555	1	8	0.5	0.650485	0.161854	0.999033
CDKL5	CCDS14186.1	18	3	33	0.768657	5	0.6	0.780583	0.455555	1	8	0.5	0.650485	0.161854	0.998967
CDKL5	CCDS14186.1	19	4	34	0.771536	4	0.5	0.648058	0.347295	1	7	0.428571	0.555479	0.108133	0.9988
CDKL5	CCDS14186.1	20	5	35	0.771536	4	0.5	0.648058	0.347295	1	8	0.375	0.486044	0.0524872	0.9986
CDKL5	CCDS14186.1	21	6	36	0.771536	4	0.5	0.648058	0.347295	1	8	0.375	0.486044	0.0524872	0.998533
CDKL5	CCDS14186.1	22	7	37	0.774436	3	0.333333	0.430421	0.235253	0.999605	7	0.285714	0.368932	0.0300026	0.9971
CDKL5	CCDS14186.1	23	8	38	0.778195	3	0.333333	0.428341	0.229798	0.999407	7	0.285714	0.36715	0.0285913	0.996433
CDKL5	CCDS14186.1	24	9	39	0.770677	3	0.333333	0.43252	0.239567	0.999407	5	0.2	0.259512	0.0376235	0.9966
CDKL5	CCDS14186.1	25	10	40	0.770677	3	0.333333	0.43252	0.239567	0.999336	5	0.2	0.259512	0.0376235	0.9966
CDKL5	CCDS14186.1	26	11	41	0.763158	3	0.333333	0.436782	0.24863	0.999407	5	0.2	0.262069	0.0406613	0.996333
CDKL5	CCDS14186.1	27	12	42	0.762264	3	0.333333	0.437294	0.249753	0.999407	5	0.2	0.262376	0.0410271	0.995633
CDKL5	CCDS14186.1	28	13	43	0.762264	3	0.333333	0.437294	0.249753	0.999407	5	0.2	0.262376	0.0410271	0.9953
CDKL5	CCDS14186.1	29	14	44	0.762264	3	0.333333	0.437294	0.249753	0.99944	5	0.2	0.262376	0.0410271	0.9952
CDKL5	CCDS14186.1	30	15	45	0.762264	3	0.333333	0.437294	0.249753	0.999336	4	0.25	0.32797	0.0952413	0.994933
CDKL5	CCDS14186.1	31	16	46	0.766038	3	0.333333	0.43514	0.245118	0.999094	4	0.25	0.326355	0.0924316	0.994533
CDKL5	CCDS14186.1	32	17	47	0.773585	3	0.333333	0.430894	0.236405	0.999028	4	0.25	0.323171	0.0863218	0.9943
CDKL5	CCDS14186.1	33	18	48	0.780303	2	0.5	0.640777	0.517451	0.998896	3	0.333333	0.427184	0.206388	0.993833
CDKL5	CCDS14186.1	34	19	49	0.787072	2	0.5	0.635266	0.507795	0.998896	3	0.333333	0.42351	0.197478	0.978967
CDKL5	CCDS14186.1	35	20	50	0.794677	2	0.5	0.629187	0.496002	0.998797	3	0.333333	0.419458	0.187457	0.979233
CDKL5	CCDS14186.1	36	21	51	0.801527	2	0.5	0.62381	0.484841	0.9986	3	0.333333	0.415873	0.178941	0.978833
CDKL5	CCDS14186.1	37	22	52	0.801527	2	0.5	0.62381	0.484841	0.9986	3	0.333333	0.415873	0.178941	0.977467
CDKL5	CCDS14186.1	38	23	53	0.802281	2	0.5	0.623223	0.483862	0.9986	3	0.333333	0.415482	0.178001	0.977367
CDKL5	CCDS14186.1	39	24	54	0.80916	2	0.5	0.617925	0.473973	0.998237	3	0.333333	0.41195	0.169743	0.9764
CDKL5	CCDS14186.1	40	25	55	0.809886	2	0.5	0.617371	0.472665	0.998073	3	0.333333	0.411581	0.168795	0.972833
CDKL5	CCDS14186.1	41	26	56	0.810606	4	0.5	0.616822	0.274145	0.997864	5	0.4	0.493458	0.104652	0.973
CDKL5	CCDS14186.1	42	27	57	0.810606	4	0.5	0.616822	0.274145	0.997529	5	0.4	0.493458	0.104652	0.972533
CDKL5	CCDS14186.1	43	28	58	0.812977	4	0.5	0.615023	0.27037	0.997068	5	0.4	0.492019	0.102349	0.972333
CDKL5	CCDS14186.1	44	29	59	0.808429	4	0.5	0.618483	0.278082	0.996497	5	0.4	0.494787	0.10711	0.971433
CDKL5	CCDS14186.1	45	30	60	0.808429	5	0.4	0.494787	0.124619	0.995635	6	0.333333	0.412322	0.0440868	0.968433
CDKL5	CCDS14186.1	46	31	61	0.801527	5	0.4	0.499048	0.132206	0.993361	6	0.333333	0.415873	0.0482246	0.9666
CDKL5	CCDS14186.1	47	32	62	0.805344	4	0.5	0.620853	0.283975	0.987102	5	0.4	0.496682	0.110454	0.957433
CDKL5	CCDS14186.1	48	33	63	0.80916	4	0.5	0.617925	0.27674	0.975033	5	0.4	0.49434	0.106121	0.949333
CDKL5	CCDS14186.1	49	34	64	0.802281	5	0.4	0.498578	0.131382	0.979101	6	0.333333	0.415482	0.0477898	0.975033
CDKL5	CCDS14186.1	50	35	65	0.791667	6	0.5	0.631579	0.208075	0.98893	7	0.428571	0.541353	0.0859882	0.993133
CDKL5	CCDS14186.1	51	36	66	0.791667	6	0.5	0.631579	0.208075	0.990336	6	0.5	0.631579	0.187745	0.993667
CDKL5	CCDS14186.1	52	37	67	0.784091	5	0.4	0.510145	0.153103	0.991566	5	0.4	0.510145	0.135307	0.993933
CDKL5	CCDS14186.1	53	38	68	0.784091	5	0.4	0.510145	0.153103	0.992763	5	0.4	0.510145	0.135307	0.994167
CDKL5	CCDS14186.1	54	39	69	0.787072	5	0.4	0.508213	0.149602	0.994366	5	0.4	0.508213	0.131626	0.994333
CDKL5	CCDS14186.1	55	40	70	0.793893	5	0.4	0.503846	0.140985	0.996063	5	0.4	0.503846	0.123516	0.995067
CDKL5	CCDS14186.1	56	41	71	0.801527	5	0.4	0.499048	0.132206	0.996195	5	0.4	0.499048	0.114777	0.995667
CDKL5	CCDS14186.1	57	42	72	0.801527	6	0.333333	0.415873	0.0611487	0.99687	6	0.333333	0.415873	0.0482246	0.996067
CDKL5	CCDS14186.1	58	43	73	0.794677	6	0.333333	0.419458	0.0659226	0.997529	6	0.333333	0.419458	0.0525622	0.995867
CDKL5	CCDS14186.1	59	44	74	0.794677	6	0.333333	0.419458	0.0659226	0.997935	6	0.333333	0.419458	0.0525622	0.9961
CDKL5	CCDS14186.1	60	45	75	0.790076	6	0.333333	0.4219	0.0687141	0.99804	7	0.285714	0.361629	0.0238214	0.9961
CDKL5	CCDS14186.1	61	46	76	0.790076	6	0.333333	0.4219	0.0687141	0.998106	7	0.285714	0.361629	0.0238214	0.996033
CDKL5	CCDS14186.1	62	47	77	0.789272	6	0.333333	0.42233	0.0692286	0.998237	7	0.285714	0.361997	0.0241391	0.996
CDKL5	CCDS14186.1	63	48	78	0.781609	6	0.333333	0.426471	0.0744448	0.998435	7	0.285714	0.365546	0.0271863	0.995933
CDKL5	CCDS14186.1	64	49	79	0.782443	6	0.333333	0.426016	0.0738771	0.998666	7	0.285714	0.365157	0.0267934	0.995933
CDKL5	CCDS14186.1	65	50	80	0.775665	8	0.5	0.644608	0.168224	0.998797	9	0.444444	0.572985	0.0749852	0.995967
CDKL5	CCDS14186.1	66	51	81	0.764259	8	0.5	0.654229	0.188324	0.998732	10	0.5	0.654229	0.123256	0.996167
CDKL5	CCDS14186.1	67	52	82	0.761364	8	0.5	0.656716	0.193458	0.998666	10	0.5	0.656716	0.127673	0.996167
CDKL5	CCDS14186.1	68	53	83	0.753788	9	0.444444	0.589615	0.115692	0.998797	11	0.454545	0.603015	0.0756145	0.9964
CDKL5	CCDS14186.1	69	54	84	0.760456	9	0.444444	0.584444	0.107374	0.998797	11	0.454545	0.597727	0.0688121	0.9963
CDKL5	CCDS14186.1	70	55	85	0.756654	9	0.444444	0.587381	0.112094	0.998797	11	0.454545	0.600731	0.0727778	0.9964
CDKL5	CCDS14186.1	71	56	86	0.755725	9	0.444444	0.588103	0.113307	0.998863	11	0.454545	0.601469	0.0737398	0.9963
CDKL5	CCDS14186.1	72	57	87	0.758621	7	0.428571	0.564935	0.14111	0.998896	9	0.444444	0.585859	0.092759	0.996533
CDKL5	CCDS14186.1	73	58	88	0.758621	7	0.428571	0.564935	0.14111	0.99883	9	0.444444	0.585859	0.092759	0.996333
CDKL5	CCDS14186.1	74	59	89	0.764259	7	0.428571	0.560768	0.134252	0.998929	9	0.444444	0.581537	0.0865072	0.9964
CDKL5	CCDS14186.1	75	60	90	0.775665	7	0.428571	0.552521	0.120815	0.999231	9	0.444444	0.572985	0.0749852	0.9964
CDKL5	CCDS14186.1	76	61	91	0.774809	6	0.5	0.64532	0.238013	0.999473	8	0.5	0.64532	0.151882	0.996333
CDKL5	CCDS14186.1	77	62	92	0.774809	6	0.5	0.64532	0.238013	0.999473	8	0.5	0.64532	0.151882	0.9963
CDKL5	CCDS14186.1	78	63	93	0.774809	6	0.5	0.64532	0.238013	0.999264	8	0.5	0.64532	0.151882	0.9963
CDKL5	CCDS14186.1	79	64	94	0.770115	6	0.5	0.649254	0.245519	0.999264	8	0.5	0.649254	0.159523	0.9961
CDKL5	CCDS14186.1	80	65	95	0.777778	5	0.6	0.771429	0.43443	0.999193	7	0.571429	0.734694	0.280945	0.996
CDKL5	CCDS14186.1	81	66	96	0.793103	4	0.5	0.630435	0.306739	0.999264	6	0.5	0.630435	0.185213	0.9958
CDKL5	CCDS14186.1	82	67	97	0.793103	5	0.4	0.504348	0.141523	0.999407	7	0.428571	0.540373	0.0845882	0.996
CDKL5	CCDS14186.1	83	68	98	0.8	5	0.4	0.5	0.133929	0.999193	7	0.428571	0.535714	0.0779753	0.995867
CDKL5	CCDS14186.1	84	69	99	0.796154	5	0.4	0.502415	0.138263	0.999127	7	0.428571	0.538302	0.0816778	0.995933
CDKL5	CCDS14186.1	85	70	100	0.785441	5	0.4	0.509268	0.151385	0.999193	7	0.428571	0.545645	0.0925912	0.9958
CDKL5	CCDS14186.1	86	71	101	0.785441	5	0.4	0.509268	0.151385	0.999193	7	0.428571	0.545645	0.0925912	0.9958
CDKL5	CCDS14186.1	87	72	102	0.784615	5	0.4	0.509804	0.152679	0.999193	7	0.428571	0.546218	0.0934504	0.9958
CDKL5	CCDS14186.1	88	73	103	0.792308	4	0.5	0.631068	0.308256	0.999127	7	0.571429	0.721221	0.250585	0.9958
CDKL5	CCDS14186.1	89	74	104	0.792308	4	0.5	0.631068	0.308256	0.999407	7	0.571429	0.721221	0.250585	0.9958
CDKL5	CCDS14186.1	90	75	105	0.793103	4	0.5	0.630435	0.306739	0.999264	7	0.571429	0.720497	0.249339	0.9958
CDKL5	CCDS14186.1	91	76	106	0.789272	4	0.5	0.633495	0.314132	0.999193	6	0.666667	0.84466	0.709278	0.995533
CDKL5	CCDS14186.1	92	77	107	0.782443	4	0.5	0.639024	0.327189	0.999264	6	0.666667	0.852033	0.71258	0.995267
CDKL5	CCDS14186.1	93	78	108	0.775665	4	0.5	0.644608	0.339254	0.999094	6	0.666667	0.859477	0.716603	0.995
CDKL5	CCDS14186.1	94	79	109	0.775665	5	0.4	0.515686	0.163991	0.998962	7	0.571429	0.736695	0.286121	0.994933
CDKL5	CCDS14186.1	95	80	110	0.774809	5	0.4	0.516256	0.164979	0.996969	7	0.571429	0.737509	0.287985	0.996
CDKL5	CCDS14186.1	96	81	111	0.781609	3	0	0	0.0467747	0.997068	6	0.333333	0.426471	0.0607161	0.996333
CDKL5	CCDS14186.1	97	82	112	0.785441	3	0	0	0.0451858	0.997101	5	0.2	0.254634	0.0316287	0.9966
CDKL5	CCDS14186.1	98	83	113	0.788462	4	0	0	0.0180951	0.997134	6	0.166667	0.211382	0.0121356	0.9969
CDKL5	CCDS14186.1	99	84	114	0.796935	3	0	0	0.0408012	0.997035	5	0.2	0.250962	0.0274989	0.9969
CDKL5	CCDS14186.1	100	85	115	0.796154	3	0	0	0.0410336	0.997101	6	0.333333	0.41868	0.0516294	0.9969
CDKL5	CCDS14186.1	101	86	116	0.796935	3	0	0	0.0408012	0.997298	6	0.333333	0.418269	0.0511453	0.997
CDKL5	CCDS14186.1	102	87	117	0.796935	3	0	0	0.0408012	0.997397	7	0.428571	0.537775	0.0809011	0.996967
CDKL5	CCDS14186.1	103	88	118	0.800766	3	0	0	0.0394692	0.997266	7	0.428571	0.535202	0.0772918	0.9968
CDKL5	CCDS14186.1	104	89	119	0.796935	3	0	0	0.0408012	0.997463	8	0.375	0.470553	0.0372824	0.996633
CDKL5	CCDS14186.1	105	90	120	0.793103	3	0	0	0.0421873	0.997562	8	0.375	0.472826	0.0393002	0.996667
CDKL5	CCDS14186.1	106	91	121	0.793103	3	0	0	0.0421873	0.997496	8	0.375	0.472826	0.0393002	0.996633
CDKL5	CCDS14186.1	107	92	122	0.787072	3	0	0	0.0446694	0.997496	8	0.375	0.476449	0.0425382	0.996767
CDKL5	CCDS14186.1	108	93	123	0.790875	3	0	0	0.0431531	0.997496	8	0.375	0.474159	0.040405	0.997
CDKL5	CCDS14186.1	109	94	124	0.791667	3	0	0	0.0428447	0.997463	10	0.4	0.505263	0.0295139	0.9969
CDKL5	CCDS14186.1	110	95	125	0.794677	4	0.25	0.314593	0.0863223	0.997727	11	0.454545	0.571988	0.041685	0.9971
CDKL5	CCDS14186.1	111	96	126	0.793893	4	0.25	0.314904	0.0868257	0.997793	11	0.454545	0.572552	0.0422178	0.9972
CDKL5	CCDS14186.1	112	97	127	0.790076	4	0.25	0.316425	0.0898741	0.997798	11	0.454545	0.575318	0.0447027	0.996967
CDKL5	CCDS14186.1	113	98	128	0.796935	3	0.333333	0.418269	0.204673	0.998007	10	0.5	0.627404	0.0805407	0.996967
CDKL5	CCDS14186.1	114	99	129	0.79771	3	0.333333	0.417863	0.203813	0.99804	10	0.5	0.626794	0.0797682	0.996767
CDKL5	CCDS14186.1	115	100	130	0.802281	3	0.333333	0.415482	0.197807	0.998106	10	0.5	0.623223	0.0745623	0.997067
CDKL5	CCDS14186.1	116	101	131	0.809886	3	0.333333	0.411581	0.18792	0.998172	10	0.5	0.617371	0.0666748	0.997267
CDKL5	CCDS14186.1	117	102	132	0.80303	3	0.333333	0.415094	0.196876	0.998106	10	0.5	0.622642	0.0737586	0.9974
CDKL5	CCDS14186.1	118	103	133	0.803774	3	0.333333	0.41471	0.195883	0.997897	10	0.5	0.622066	0.0729475	0.997333
CDKL5	CCDS14186.1	119	104	134	0.787879	3	0.333333	0.423077	0.216893	0.997793	9	0.444444	0.564103	0.0638718	0.997433
CDKL5	CCDS14186.1	120	105	135	0.795455	3	0.333333	0.419048	0.206672	0.997694	9	0.444444	0.55873	0.0578409	0.997433
CDKL5	CCDS14186.1	121	106	136	0.791667	3	0.333333	0.421053	0.211676	0.997935	9	0.444444	0.561404	0.0606661	0.997333
CDKL5	CCDS14186.1	122	107	137	0.799242	3	0.333333	0.417062	0.201744	0.998001	9	0.444444	0.556082	0.0548903	0.997333
CDKL5	CCDS14186.1	123	108	138	0.799242	3	0.333333	0.417062	0.201744	0.998106	9	0.444444	0.556082	0.0548903	0.997133
CDKL5	CCDS14186.1	124	109	139	0.806084	3	0.333333	0.413522	0.192954	0.998106	9	0.444444	0.551363	0.0496661	0.9966
CDKL5	CCDS14186.1	125	110	140	0.813688	2	0.5	0.614486	0.466687	0.997968	8	0.5	0.614486	0.0959578	0.996333
CDKL5	CCDS14186.1	126	111	141	0.806818	2	0.5	0.619718	0.476706	0.997595	8	0.5	0.619718	0.104814	0.996433
CDKL5	CCDS14186.1	127	112	142	0.802281	2	0.5	0.623223	0.483862	0.997694	7	0.571429	0.712255	0.232001	0.996333
CDKL5	CCDS14186.1	128	113	143	0.806084	3	0.666667	0.827044	0.598986	0.997694	7	0.571429	0.708895	0.224284	0.996067
CDKL5	CCDS14186.1	129	114	144	0.806818	2	1	1.23944	1	0.997562	6	0.666667	0.826291	0.434049	0.996333
CDKL5	CCDS14186.1	130	115	145	0.806818	2	1	1.23944	1	0.997496	6	0.666667	0.826291	0.434049	0.996
CDKL5	CCDS14186.1	131	116	146	0.808271	4	0.75	0.927907	0.692059	0.997397	7	0.571429	0.706977	0.219961	0.9959
CDKL5	CCDS14186.1	132	117	147	0.81203	4	0.75	0.923611	0.68511	0.9972	7	0.571429	0.703704	0.212144	0.995333
CDKL5	CCDS14186.1	133	118	148	0.80597	4	0.75	0.930556	0.695889	0.9972	6	0.5	0.62037	0.164908	0.994367
CDKL5	CCDS14186.1	134	119	149	0.795539	4	0.75	0.942757	1	0.996936	6	0.5	0.628505	0.181441	0.993867
CDKL5	CCDS14186.1	135	120	150	0.80597	4	0.75	0.930556	0.695889	0.995904	5	0.6	0.744444	0.352099	0.989633
CDKL5	CCDS14186.1	136	121	151	0.798507	5	0.6	0.751402	0.386403	0.995668	6	0.5	0.626168	0.176568	0.987067
CDKL5	CCDS14186.1	137	122	152	0.798507	5	0.6	0.751402	0.386403	0.996195	6	0.5	0.626168	0.176568	0.985733
CDKL5	CCDS14186.1	138	123	153	0.80597	5	0.6	0.744444	0.37056	0.99636	7	0.428571	0.531746	0.0723507	0.9839
CDKL5	CCDS14186.1	139	124	154	0.809701	5	0.6	0.741014	0.363766	0.99636	7	0.428571	0.529296	0.0688224	0.983267
CDKL5	CCDS14186.1	140	125	155	0.802239	5	0.6	0.747907	0.378042	0.996607	5	0.4	0.498605	0.113945	0.985933
CDKL5	CCDS14186.1	141	126	156	0.8	4	0.5	0.625	0.293784	0.996705	4	0.25	0.3125	0.0674383	0.987333
CDKL5	CCDS14186.1	142	127	157	0.793358	4	0.5	0.630233	0.306428	0.996969	4	0.25	0.315116	0.071935	0.9885
CDKL5	CCDS14186.1	143	128	158	0.785978	5	0.6	0.76338	0.415482	0.996969	5	0.4	0.50892	0.133179	0.9883
CDKL5	CCDS14186.1	144	129	159	0.786765	6	0.5	0.635514	0.216858	0.9972	6	0.333333	0.423676	0.0576653	0.988167
CDKL5	CCDS14186.1	145	130	160	0.775735	7	0.428571	0.552471	0.120815	0.9972	7	0.285714	0.368314	0.0295528	0.988967
CDKL5	CCDS14186.1	146	131	161	0.766667	7	0.428571	0.559006	0.131382	0.9972	7	0.285714	0.372671	0.0332221	0.989433
CDKL5	CCDS14186.1	147	132	162	0.769517	8	0.5	0.649758	0.178769	0.997167	8	0.375	0.487319	0.0537965	0.989367
CDKL5	CCDS14186.1	148	133	163	0.769517	8	0.5	0.649758	0.178769	0.997266	8	0.375	0.487319	0.0537965	0.990033
CDKL5	CCDS14186.1	149	134	164	0.769517	8	0.5	0.649758	0.178769	0.997397	8	0.375	0.487319	0.0537965	0.991533
CDKL5	CCDS14186.1	150	135	165	0.781481	8	0.5	0.63981	0.158984	0.997397	8	0.375	0.479858	0.0458011	0.991933
CDKL5	CCDS14186.1	151	136	166	0.774074	8	0.5	0.645933	0.170862	0.997463	8	0.375	0.48445	0.0506947	0.990667
CDKL5	CCDS14186.1	152	137	167	0.777778	8	0.5	0.642857	0.164789	0.997496	8	0.375	0.482143	0.0482246	0.989067
CDKL5	CCDS14186.1	153	138	168	0.776952	8	0.5	0.643541	0.166109	0.997364	8	0.375	0.482656	0.0488403	0.989033
CDKL5	CCDS14186.1	154	139	169	0.776952	8	0.5	0.643541	0.166109	0.997035	9	0.333333	0.429027	0.0228657	0.989133
CDKL5	CCDS14186.1	155	140	170	0.776952	8	0.5	0.643541	0.166109	0.998506	9	0.333333	0.429027	0.0228657	0.993667
CDKL5	CCDS14186.1	156	141	171	0.775281	8	0.5	0.644928	0.168795	0.999407	10	0.3	0.386957	0.0110375	0.9961
CDKL5	CCDS14186.1	157	142	172	0.775281	8	0.5	0.644928	0.168795	0.999473	10	0.3	0.386957	0.0110375	0.996167
CDKL5	CCDS14186.1	158	143	173	0.773234	8	0.5	0.646635	0.172173	0.999506	10	0.3	0.387981	0.0114683	0.9963
CDKL5	CCDS14186.1	159	144	174	0.769517	7	0.428571	0.556936	0.128021	0.999506	10	0.3	0.389855	0.0122306	0.9963
CDKL5	CCDS14186.1	160	145	175	0.764925	7	0.428571	0.560279	0.133559	0.999506	10	0.3	0.392195	0.0132767	0.9963
CDKL5	CCDS14186.1	161	146	176	0.766917	7	0.428571	0.558824	0.131166	0.999506	10	0.3	0.391176	0.012819	0.9963
CDKL5	CCDS14186.1	162	147	177	0.765152	5	0.4	0.522772	0.178325	0.999506	8	0.25	0.326733	0.0154136	0.996367
CDKL5	CCDS14186.1	163	148	178	0.753788	7	0.285714	0.379038	0.0507033	0.999407	10	0.2	0.265327	0.00398481	0.9964
CDKL5	CCDS14186.1	164	149	179	0.753788	7	0.285714	0.379038	0.0507033	0.999407	10	0.2	0.265327	0.00398481	0.9963
CDKL5	CCDS14186.1	165	150	180	0.757576	7	0.285714	0.377143	0.0485978	0.99944	10	0.2	0.264	0.00369507	0.9963
CDKL5	CCDS14186.1	166	151	181	0.757576	7	0.285714	0.377143	0.0485978	0.999473	10	0.2	0.264	0.00369507	0.9963
CDKL5	CCDS14186.1	167	152	182	0.761364	6	0.333333	0.437811	0.0912409	0.999506	9	0.222222	0.291874	0.0073654	0.996533
CDKL5	CCDS14186.1	168	153	183	0.756654	6	0.333333	0.440536	0.0955425	0.999572	9	0.222222	0.293691	0.00800358	0.9964
CDKL5	CCDS14186.1	169	154	184	0.749049	6	0.333333	0.445008	0.102267	0.999506	8	0.25	0.333756	0.0195606	0.9964
CDKL5	CCDS14186.1	170	155	185	0.741445	6	0.333333	0.449573	0.109011	0.999572	9	0.222222	0.299715	0.0104825	0.996467
CDKL5	CCDS14186.1	171	156	186	0.741445	7	0.428571	0.578022	0.164494	0.999506	9	0.222222	0.299715	0.0104825	0.9967
CDKL5	CCDS14186.1	172	157	187	0.73384	7	0.428571	0.584012	0.175742	0.999473	9	0.222222	0.302821	0.0118535	0.996567
CDKL5	CCDS14186.1	173	158	188	0.739464	7	0.428571	0.579571	0.167258	0.999473	9	0.222222	0.300518	0.0108104	0.9964
CDKL5	CCDS14186.1	174	159	189	0.738462	6	0.333333	0.451389	0.112174	0.999506	8	0.125	0.169271	0.00488857	0.996633
CDKL5	CCDS14186.1	175	160	190	0.737452	5	0.4	0.542408	0.218349	0.999297	7	0.142857	0.193717	0.0109351	0.996667
CDKL5	CCDS14186.1	176	161	191	0.741313	4	0.5	0.674479	0.398554	0.99916	6	0.166667	0.224826	0.0227734	0.996633
CDKL5	CCDS14186.1	177	162	192	0.743295	4	0.5	0.67268	0.394701	0.998962	6	0.166667	0.224227	0.0221944	0.996533
CDKL5	CCDS14186.1	178	163	193	0.744275	3	0.333333	0.447863	0.271864	0.998896	5	0	0	0.00784619	0.996633
CDKL5	CCDS14186.1	179	164	194	0.755725	3	0.333333	0.441077	0.257153	0.998797	5	0	0	0.00687681	0.9964
CDKL5	CCDS14186.1	180	165	195	0.757692	3	0.333333	0.439932	0.254815	0.998797	5	0	0	0.00670736	0.9964
CDKL5	CCDS14186.1	181	166	196	0.749035	4	0.25	0.333763	0.124026	0.998797	6	0	0	0.00309963	0.996467
CDKL5	CCDS14186.1	182	167	197	0.749035	4	0.25	0.333763	0.124026	0.998797	6	0	0	0.00309963	0.9966
CDKL5	CCDS14186.1	183	168	198	0.741313	4	0.25	0.33724	0.130905	0.998863	6	0	0	0.00344626	0.996533
CDKL5	CCDS14186.1	184	169	199	0.742308	4	0.25	0.336788	0.130228	0.998863	6	0	0	0.00338201	0.9966
CDKL5	CCDS14186.1	185	170	200	0.746154	4	0.25	0.335052	0.126504	0.999099	5	0	0	0.00764729	0.997167
CDKL5	CCDS14186.1	186	171	201	0.739464	5	0.2	0.270466	0.0651442	0.999703	6	0	0	0.00356609	0.9983
CDKL5	CCDS14186.1	187	172	202	0.73384	5	0.2	0.272539	0.0680142	0.999572	5	0	0	0.0089758	0.9983
CDKL5	CCDS14186.1	188	173	203	0.740458	5	0.2	0.270103	0.0646295	0.999506	5	0	0	0.00823033	0.9984
CDKL5	CCDS14186.1	189	174	204	0.740458	5	0.2	0.270103	0.0646295	0.999572	5	0	0	0.00823033	0.998367
CDKL5	CCDS14186.1	190	175	205	0.748092	5	0.2	0.267347	0.060297	0.999703	6	0	0	0.00314108	0.998333
CDKL5	CCDS14186.1	191	176	206	0.752852	5	0.2	0.265657	0.0576491	0.999703	6	0	0	0.00292771	0.998267
CDKL5	CCDS14186.1	192	177	207	0.742424	5	0.2	0.269388	0.0634265	0.999703	6	0	0	0.00337869	0.9983
CDKL5	CCDS14186.1	193	178	208	0.743396	5	0.2	0.269036	0.0628985	0.999703	6	0	0	0.00334336	0.9983
CDKL5	CCDS14186.1	194	179	209	0.74717	3	0.333333	0.446128	0.26809	0.999703	4	0	0	0.0188937	0.9983
CDKL5	CCDS14186.1	195	180	210	0.749049	3	0.333333	0.445008	0.265392	0.999703	4	0	0	0.0184896	0.998333
CDKL5	CCDS14186.1	196	181	211	0.756654	3	0.333333	0.440536	0.255823	0.999703	4	0	0	0.0170921	0.9984
CDKL5	CCDS14186.1	197	182	212	0.75	3	0.333333	0.444444	0.264102	0.999703	5	0	0	0.00729479	0.9984
CDKL5	CCDS14186.1	198	183	213	0.749049	3	0.333333	0.445008	0.265392	0.999703	6	0	0	0.00309963	0.9984
CDKL5	CCDS14186.1	199	184	214	0.753788	3	0.333333	0.442211	0.259227	0.999769	6	0	0	0.00289796	0.998533
CDKL5	CCDS14186.1	200	185	215	0.761364	3	0.333333	0.437811	0.250628	0.999769	6	0	0	0.00258654	0.998667
CDKL5	CCDS14186.1	201	186	216	0.768061	3	0.333333	0.433993	0.242864	0.999736	5	0	0	0.00578935	0.9986
CDKL5	CCDS14186.1	202	187	217	0.771863	2	0	0	0.125111	0.999802	5	0	0	0.00547241	0.9986
CDKL5	CCDS14186.1	203	188	218	0.779468	2	0	0	0.119885	0.999802	5	0	0	0.00492767	0.9986
CDKL5	CCDS14186.1	204	189	219	0.780303	2	0	0	0.119319	0.999802	5	0	0	0.00485218	0.998733
CDKL5	CCDS14186.1	205	190	220	0.781132	3	0	0	0.0468868	0.999802	6	0	0	0.00192345	0.998733
CDKL5	CCDS14186.1	206	191	221	0.781955	3	0	0	0.0466755	1	7	0.142857	0.182692	0.00543686	0.998367
CDKL5	CCDS14186.1	207	192	222	0.781955	3	0	0	0.0466755	1	7	0.142857	0.182692	0.00543686	0.998233
CDKL5	CCDS14186.1	208	193	223	0.785714	3	0	0	0.045109	0.999868	7	0.142857	0.181818	0.00511451	0.9981
CDKL5	CCDS14186.1	209	194	224	0.784906	3	0	0	0.0454311	0.999802	7	0.142857	0.182005	0.00517691	0.998367
CDKL5	CCDS14186.1	210	195	225	0.780303	4	0.25	0.320388	0.0977062	1	8	0.25	0.320388	0.0120495	0.9984
CDKL5	CCDS14186.1	211	196	226	0.770677	4	0.25	0.32439	0.105421	1	8	0.25	0.32439	0.0141269	0.998333
CDKL5	CCDS14186.1	212	197	227	0.76779	3	0.333333	0.434146	0.243269	1	7	0.285714	0.372125	0.0327457	0.9983
CDKL5	CCDS14186.1	213	198	228	0.766917	3	0.333333	0.434641	0.244236	1	7	0.285714	0.372549	0.0330958	0.998233
CDKL5	CCDS14186.1	214	199	229	0.766917	4	0.25	0.32598	0.108206	1	8	0.25	0.32598	0.0150231	0.9983
CDKL5	CCDS14186.1	215	200	230	0.7603	4	0.25	0.328818	0.114336	1	8	0.25	0.328818	0.0166281	0.9983
CDKL5	CCDS14186.1	216	201	231	0.756554	4	0.25	0.330446	0.117648	1	8	0.25	0.330446	0.0175941	0.9983
CDKL5	CCDS14186.1	217	202	232	0.756554	3	0.333333	0.440594	0.25583	1	8	0.375	0.495668	0.0626074	0.998333
CDKL5	CCDS14186.1	218	203	233	0.763158	3	0.333333	0.436782	0.24863	1	8	0.375	0.491379	0.058064	0.9983
CDKL5	CCDS14186.1	219	204	234	0.763158	3	0.333333	0.436782	0.24863	1	8	0.375	0.491379	0.058064	0.998333
CDKL5	CCDS14186.1	220	205	235	0.774436	3	0.333333	0.430421	0.235253	1	8	0.375	0.484223	0.0504962	0.998167
CDKL5	CCDS14186.1	221	206	236	0.773585	3	0.333333	0.430894	0.236405	1	7	0.428571	0.554007	0.105679	0.998233
CDKL5	CCDS14186.1	222	207	237	0.766038	3	0.333333	0.43514	0.245118	1	7	0.428571	0.559465	0.114698	0.998333
CDKL5	CCDS14186.1	223	208	238	0.774436	3	0.333333	0.430421	0.235253	1	7	0.428571	0.553398	0.104727	0.9983
CDKL5	CCDS14186.1	224	209	239	0.773585	3	0.333333	0.430894	0.236405	1	7	0.428571	0.554007	0.105679	0.998033
CDKL5	CCDS14186.1	225	210	240	0.781132	4	0.5	0.640097	0.329714	1	8	0.5	0.640097	0.14134	0.997867
CDKL5	CCDS14186.1	226	211	241	0.786517	4	0.5	0.635714	0.31968	1	9	0.444444	0.565079	0.0650282	0.997867
CDKL5	CCDS14186.1	227	212	242	0.779026	4	0.5	0.641827	0.333597	1	10	0.5	0.641827	0.102793	0.997933
CDKL5	CCDS14186.1	228	213	243	0.779026	4	0.5	0.641827	0.333597	1	10	0.5	0.641827	0.102793	0.997867
CDKL5	CCDS14186.1	229	214	244	0.787313	4	0.5	0.635071	0.318269	1	10	0.6	0.762085	0.336835	0.997867
CDKL5	CCDS14186.1	230	215	245	0.788104	4	0.5	0.634434	0.316544	1	11	0.636364	0.807461	0.362662	0.998
CDKL5	CCDS14186.1	231	216	246	0.780669	4	0.5	0.640476	0.330735	1	11	0.636364	0.815152	0.374332	0.997833
CDKL5	CCDS14186.1	232	217	247	0.774074	5	0.4	0.516746	0.165988	0.999934	12	0.583333	0.753589	0.247428	0.9977
CDKL5	CCDS14186.1	233	218	248	0.766667	5	0.4	0.521739	0.176097	0.999802	13	0.615385	0.802676	0.292727	0.997533
CDKL5	CCDS14186.1	234	219	249	0.766667	5	0.4	0.521739	0.176097	0.999802	14	0.571429	0.745342	0.187015	0.997633
CDKL5	CCDS14186.1	235	220	250	0.760148	5	0.4	0.526214	0.185645	0.999802	14	0.571429	0.751734	0.196655	0.9978
CDKL5	CCDS14186.1	236	221	251	0.760148	4	0.5	0.657767	0.364842	0.999802	13	0.615385	0.809559	0.307068	0.997733
CDKL5	CCDS14186.1	237	222	252	0.752768	4	0.5	0.664216	0.376907	0.999802	12	0.583333	0.774918	0.277138	0.9975
CDKL5	CCDS14186.1	238	223	253	0.760148	4	0.5	0.657767	0.364842	0.999802	12	0.583333	0.767395	0.264734	0.997267
CDKL5	CCDS14186.1	239	224	254	0.763838	4	0.5	0.654589	0.359552	0.999802	13	0.615385	0.805648	0.298671	0.997067
CDKL5	CCDS14186.1	240	225	255	0.757353	4	0.5	0.660194	0.369422	0.999769	13	0.615385	0.812547	0.433458	0.996967
CDKL5	CCDS14186.1	241	226	256	0.757353	3	0.333333	0.440129	0.254914	0.999802	12	0.583333	0.770227	0.269121	0.9967
CDKL5	CCDS14186.1	242	227	257	0.757353	3	0.333333	0.440129	0.254914	0.999802	13	0.538462	0.710978	0.172737	0.996533
CDKL5	CCDS14186.1	243	228	258	0.763838	3	0.333333	0.436393	0.248052	0.999802	13	0.538462	0.704942	0.166706	0.995767
CDKL5	CCDS14186.1	244	229	259	0.771218	3	0.333333	0.432217	0.239183	0.999802	13	0.538462	0.698197	0.161115	0.995667
CDKL5	CCDS14186.1	245	230	260	0.774074	2	0.5	0.645933	0.525167	0.999703	12	0.583333	0.753589	0.247428	0.9959
CDKL5	CCDS14186.1	246	231	261	0.776952	2	0.5	0.643541	0.521722	0.999638	12	0.583333	0.750797	0.244691	0.995467
CDKL5	CCDS14186.1	247	232	262	0.782772	2	0.5	0.638756	0.513612	0.99944	12	0.583333	0.745215	0.239333	0.995267
CDKL5	CCDS14186.1	248	233	263	0.782772	2	0.5	0.638756	0.513612	0.999336	11	0.545455	0.696825	0.132617	0.9946
CDKL5	CCDS14186.1	249	234	264	0.775281	2	0.5	0.644928	0.523857	0.999506	11	0.545455	0.703557	0.145689	0.9995
CDKL5	CCDS14186.1	250	235	265	0.772388	2	0.5	0.647343	0.527078	0.999638	11	0.545455	0.706192	0.227611	0.9995
CDKL5	CCDS14186.1	251	236	266	0.764045	2	0.5	0.654412	0.539798	0.999703	11	0.545455	0.713904	0.232984	0.9995
CDKL5	CCDS14186.1	252	237	267	0.764925	2	0.5	0.653659	0.538581	0.999703	11	0.545455	0.713082	0.232374	0.9995
CDKL5	CCDS14186.1	253	238	268	0.772388	2	0.5	0.647343	0.527078	0.999703	11	0.545455	0.706192	0.227611	0.9995
CDKL5	CCDS14186.1	254	239	269	0.764925	2	0.5	0.653659	0.538581	0.999703	11	0.545455	0.713082	0.232374	0.9995
CDKL5	CCDS14186.1	255	240	270	0.755556	2	0.5	0.661765	0.55262	0.999703	11	0.545455	0.721925	0.24047	0.9995
CDKL5	CCDS14186.1	256	241	271	0.748148	1	0	0	0.371891	0.999703	10	0.5	0.668317	0.221241	0.9995
CDKL5	CCDS14186.1	257	242	272	0.748148	1	0	0	0.371891	0.999703	9	0.555556	0.742574	0.343805	0.9995
CDKL5	CCDS14186.1	258	243	273	0.744444	1	0	0	0.375325	0.999703	8	0.5	0.671642	0.203812	0.9995
CDKL5	CCDS14186.1	259	244	274	0.755556	1	0	0	0.36472	0.999703	7	0.571429	0.756303	0.479851	0.9995
CDKL5	CCDS14186.1	260	245	275	0.754647	1	0	0	0.36552	0.999703	6	0.5	0.662562	0.251338	0.9995
CDKL5	CCDS14186.1	261	246	276	0.754647	1	0	0	0.36552	0.999703	5	0.4	0.530049	0.173936	0.9995
CDKL5	CCDS14186.1	262	247	277	0.756554	1	0	0	0.364121	0.999703	5	0.4	0.528713	0.171513	0.9995
CDKL5	CCDS14186.1	263	248	278	0.752809	0	NA	NA	NA	0.999703	4	0.5	0.664179	0.358076	0.9995
CDKL5	CCDS14186.1	264	249	279	0.763158	0	NA	NA	NA	0.999703	4	0.25	0.327586	0.0944611	0.999433
CDKL5	CCDS14186.1	265	250	280	0.758491	0	NA	NA	NA	0.999703	3	0.333333	0.439469	0.234955	0.9994
CDKL5	CCDS14186.1	266	251	281	0.766038	0	NA	NA	NA	0.999703	3	0.333333	0.43514	0.225388	0.9994
CDKL5	CCDS14186.1	267	252	282	0.766038	1	0	0	0.355381	0.999703	4	0.25	0.326355	0.0924316	0.999433
CDKL5	CCDS14186.1	268	253	283	0.766038	1	0	0	0.355381	0.999703	4	0.25	0.326355	0.0924316	0.999333
CDKL5	CCDS14186.1	269	254	284	0.766038	2	0.5	0.652709	0.536895	0.999572	4	0.25	0.326355	0.0924316	0.999133
CDKL5	CCDS14186.1	270	255	285	0.761364	2	0.5	0.656716	0.543851	0.999506	3	0	0	0.0423247	0.999133
CDKL5	CCDS14186.1	271	256	286	0.767176	3	0.333333	0.434494	0.243866	0.999506	4	0	0	0.0152397	0.999133
CDKL5	CCDS14186.1	272	257	287	0.763359	3	0.333333	0.436667	0.248572	0.999506	4	0	0	0.0158404	0.9991
CDKL5	CCDS14186.1	273	258	288	0.763359	3	0.333333	0.436667	0.248572	0.999506	3	0	0	0.0416109	0.9991
CDKL5	CCDS14186.1	274	259	289	0.767176	3	0.333333	0.434494	0.243866	0.999506	3	0	0	0.0403105	0.999167
CDKL5	CCDS14186.1	275	260	290	0.767176	3	0.333333	0.434494	0.243866	0.999506	3	0	0	0.0403105	0.9992
CDKL5	CCDS14186.1	276	261	291	0.770992	3	0.333333	0.432343	0.239222	0.997397	3	0	0	0.0391545	0.9981
CDKL5	CCDS14186.1	277	262	292	0.770992	3	0.333333	0.432343	0.239222	0.997935	3	0	0	0.0391545	0.9981
CDKL5	CCDS14186.1	278	263	293	0.772727	3	0.333333	0.431373	0.237456	0.998166	3	0	0	0.0385436	0.9981
CDKL5	CCDS14186.1	279	264	294	0.780303	3	0.333333	0.427184	0.226925	0.998468	3	0	0	0.036117	0.998167
CDKL5	CCDS14186.1	280	265	295	0.781132	3	0.333333	0.426731	0.225799	0.998929	4	0.25	0.320048	0.0808041	0.998267
CDKL5	CCDS14186.1	281	266	296	0.777358	5	0.4	0.514563	0.161748	0.998797	6	0.333333	0.428803	0.0636762	0.998267
CDKL5	CCDS14186.1	282	267	297	0.781955	5	0.4	0.511538	0.15572	0.998732	6	0.333333	0.426282	0.060553	0.9983
CDKL5	CCDS14186.1	283	268	298	0.781132	5	0.4	0.512077	0.156907	0.99916	6	0.333333	0.426731	0.0610413	0.9984
CDKL5	CCDS14186.1	284	269	299	0.773585	5	0.4	0.517073	0.166691	0.999193	6	0.333333	0.430894	0.0663452	0.998533
CDKL5	CCDS14186.1	285	270	300	0.780303	5	0.4	0.512621	0.157844	0.999094	6	0.333333	0.427184	0.0615976	0.9984
CDKL5	CCDS14186.1	286	271	301	0.787072	5	0.4	0.508213	0.149602	0.998896	6	0.333333	0.42351	0.0574494	0.9984
CDKL5	CCDS14186.1	287	272	302	0.787072	5	0.4	0.508213	0.149602	0.999061	7	0.428571	0.544513	0.0910003	0.9984
CDKL5	CCDS14186.1	288	273	303	0.775665	5	0.4	0.515686	0.163991	0.999193	8	0.375	0.483456	0.0496661	0.9984
CDKL5	CCDS14186.1	289	274	304	0.787072	5	0.4	0.508213	0.149602	0.99944	8	0.375	0.476449	0.0425382	0.9986
CDKL5	CCDS14186.1	290	275	305	0.775665	6	0.5	0.644608	0.237032	0.999506	11	0.454545	0.586007	0.0559766	0.998833
CDKL5	CCDS14186.1	291	276	306	0.768939	6	0.5	0.650246	0.247771	0.999506	12	0.5	0.650246	0.0856856	0.9989
CDKL5	CCDS14186.1	292	277	307	0.761364	6	0.5	0.656716	0.259122	0.999506	12	0.5	0.656716	0.0952603	0.9989
CDKL5	CCDS14186.1	293	278	308	0.757576	6	0.5	0.66	0.265764	0.999473	12	0.5	0.66	0.10073	0.998833
CDKL5	CCDS14186.1	294	279	309	0.765152	6	0.5	0.653465	0.25337	0.999407	12	0.5	0.653465	0.0906323	0.9989
CDKL5	CCDS14186.1	295	280	310	0.756654	6	0.5	0.660804	0.267619	0.99944	11	0.545455	0.720877	0.239536	0.9991
CDKL5	CCDS14186.1	296	281	311	0.753788	6	0.5	0.663317	0.272792	0.999473	12	0.5	0.663317	0.154857	0.998967
CDKL5	CCDS14186.1	297	282	312	0.752852	6	0.5	0.664141	0.27441	0.999539	12	0.5	0.664141	0.15536	0.9991
CDKL5	CCDS14186.1	298	283	313	0.755725	6	0.5	0.661616	0.269635	0.999703	12	0.5	0.661616	0.153789	0.999033
CDKL5	CCDS14186.1	299	284	314	0.762452	6	0.5	0.655779	0.257469	0.999703	12	0.5	0.655779	0.0938696	0.9989
CDKL5	CCDS14186.1	300	285	315	0.754789	5	0.4	0.529949	0.19322	0.999703	12	0.5	0.662437	0.154232	0.9989
CDKL5	CCDS14186.1	301	286	316	0.757692	5	0.4	0.527919	0.189106	0.999703	12	0.5	0.659898	0.100568	0.9989
CDKL5	CCDS14186.1	302	287	317	0.759542	6	0.5	0.658291	0.262424	0.999506	13	0.538462	0.708929	0.170602	0.9989
CDKL5	CCDS14186.1	303	288	318	0.756654	6	0.5	0.660804	0.267619	0.999506	13	0.538462	0.711635	0.173429	0.9989
CDKL5	CCDS14186.1	304	289	319	0.763359	6	0.5	0.655	0.25583	0.999506	13	0.538462	0.705385	0.167028	0.999033
CDKL5	CCDS14186.1	305	290	320	0.764259	6	0.5	0.654229	0.254602	0.999506	13	0.538462	0.704554	0.166406	0.9989
CDKL5	CCDS14186.1	306	291	321	0.765152	6	0.5	0.653465	0.25337	0.999506	14	0.5	0.653465	0.0682535	0.9989
CDKL5	CCDS14186.1	307	292	322	0.758491	6	0.5	0.659204	0.264102	0.999506	15	0.533333	0.703151	0.12477	0.9989
CDKL5	CCDS14186.1	308	293	323	0.758491	7	0.428571	0.565032	0.14113	0.999506	16	0.5	0.659204	0.0795082	0.9991
CDKL5	CCDS14186.1	309	294	324	0.750943	7	0.428571	0.570711	0.151385	0.999506	16	0.5	0.665829	0.0835566	0.999033
CDKL5	CCDS14186.1	310	295	325	0.750943	8	0.5	0.665829	0.212222	0.999703	17	0.529412	0.704996	0.100228	0.9989
CDKL5	CCDS14186.1	311	296	326	0.753788	8	0.5	0.663317	0.206876	0.999703	16	0.5	0.663317	0.0818014	0.9989
CDKL5	CCDS14186.1	312	297	327	0.761364	6	0.5	0.656716	0.259122	0.999703	14	0.5	0.656716	0.107816	0.998867
CDKL5	CCDS14186.1	313	298	328	0.760456	6	0.5	0.6575	0.260676	0.999703	14	0.5	0.6575	0.108133	0.998733
CDKL5	CCDS14186.1	314	299	329	0.753788	7	0.428571	0.568557	0.14768	0.999703	15	0.466667	0.619095	0.0467024	0.9983
CDKL5	CCDS14186.1	315	300	330	0.753788	8	0.5	0.663317	0.206876	0.999703	16	0.5	0.663317	0.0818014	0.998333
CDKL5	CCDS14186.1	316	301	331	0.753788	8	0.5	0.663317	0.206876	0.999703	16	0.5	0.663317	0.0818014	0.998133
CDKL5	CCDS14186.1	317	302	332	0.758491	9	0.555556	0.732449	0.354912	0.999703	17	0.529412	0.697981	0.0924639	0.997933
CDKL5	CCDS14186.1	318	303	333	0.758491	10	0.6	0.791045	0.388406	0.999703	17	0.529412	0.697981	0.0924639	0.998
CDKL5	CCDS14186.1	319	304	334	0.762264	11	0.545455	0.715572	0.25352	0.999703	17	0.529412	0.694525	0.0891504	0.997933
CDKL5	CCDS14186.1	320	305	335	0.757576	11	0.545455	0.72	0.257225	0.999703	17	0.529412	0.698824	0.0932012	0.998
CDKL5	CCDS14186.1	321	306	336	0.764259	11	0.454545	0.594754	0.0798807	0.999703	15	0.466667	0.610614	0.0393002	0.998
CDKL5	CCDS14186.1	322	307	337	0.764259	11	0.454545	0.594754	0.0798807	0.999703	14	0.428571	0.560768	0.0273857	0.9978
CDKL5	CCDS14186.1	323	308	338	0.771863	13	0.538462	0.697613	0.179031	0.999703	15	0.466667	0.604598	0.0342207	0.9979
CDKL5	CCDS14186.1	324	309	339	0.781132	13	0.538462	0.689335	0.114336	0.999638	16	0.4375	0.560085	0.0150228	0.9978
CDKL5	CCDS14186.1	325	310	340	0.780303	14	0.571429	0.732316	0.190885	0.999407	17	0.470588	0.603084	0.0216643	0.9978
CDKL5	CCDS14186.1	326	311	341	0.781955	14	0.571429	0.730769	0.189274	0.99894	17	0.470588	0.60181	0.0209036	0.997633
CDKL5	CCDS14186.1	327	312	342	0.789474	14	0.571429	0.72381	0.183355	0.998073	16	0.5	0.633333	0.0337744	0.9978
CDKL5	CCDS14186.1	328	313	343	0.790262	15	0.6	0.759242	0.200336	0.998534	17	0.529412	0.669919	0.0442465	0.997767
CDKL5	CCDS14186.1	329	314	344	0.794007	14	0.642857	0.809636	0.295846	0.9986	16	0.5625	0.708432	0.0740591	0.997767
CDKL5	CCDS14186.1	330	315	345	0.794776	14	0.642857	0.808853	0.294365	0.998797	16	0.5625	0.707746	0.0730642	0.997967
CDKL5	CCDS14186.1	331	316	346	0.798507	15	0.6	0.751402	0.191502	0.999061	18	0.555556	0.695742	0.0493535	0.998167
CDKL5	CCDS14186.1	332	317	347	0.799257	15	0.6	0.750698	0.190741	0.999336	18	0.555556	0.69509	0.0485727	0.998867
CDKL5	CCDS14186.1	333	318	348	0.799257	13	0.615385	0.769946	0.262527	0.999506	16	0.5625	0.703779	0.0674121	0.9989
CDKL5	CCDS14186.1	334	319	349	0.795539	14	0.642857	0.808077	0.293292	0.999506	16	0.5625	0.707068	0.0719839	0.999033
CDKL5	CCDS14186.1	335	320	350	0.796296	14	0.642857	0.807309	0.292049	0.99944	16	0.5625	0.706395	0.0710136	0.998967
CDKL5	CCDS14186.1	336	321	351	0.788889	14	0.642857	0.814889	0.306341	0.999473	17	0.588235	0.74565	0.12939	0.9989
CDKL5	CCDS14186.1	337	322	352	0.781481	15	0.666667	0.853081	0.472302	0.999638	17	0.647059	0.82799	0.335457	0.9989
CDKL5	CCDS14186.1	338	323	353	0.777778	15	0.666667	0.857143	0.476418	0.999638	17	0.647059	0.831933	0.339715	0.9989
CDKL5	CCDS14186.1	339	324	354	0.774908	14	0.714286	0.921769	0.653595	0.999506	17	0.705882	0.910924	0.661528	0.9989
CDKL5	CCDS14186.1	340	325	355	0.771218	15	0.733333	0.950877	0.841463	0.999638	18	0.722222	0.93647	0.680219	0.9991
CDKL5	CCDS14186.1	341	326	356	0.763838	15	0.733333	0.960064	0.845315	0.999506	18	0.722222	0.945518	0.857974	0.9992
CDKL5	CCDS14186.1	342	327	357	0.768382	16	0.6875	0.894737	0.51725	0.999638	19	0.684211	0.890456	0.520001	0.9992
CDKL5	CCDS14186.1	343	328	358	0.767528	17	0.705882	0.919683	0.686254	0.999703	20	0.7	0.912019	0.54241	0.999333
CDKL5	CCDS14186.1	344	329	359	0.761029	17	0.705882	0.927536	0.693016	0.999769	20	0.7	0.919807	0.697145	0.9991
CDKL5	CCDS14186.1	345	330	360	0.761029	16	0.75	0.985507	1	0.999769	20	0.7	0.919807	0.697145	0.9991
CDKL5	CCDS14186.1	346	331	361	0.761029	15	0.733333	0.963607	0.846729	0.999802	19	0.684211	0.899059	0.529838	0.9991
CDKL5	CCDS14186.1	347	332	362	0.754579	16	0.6875	0.911104	0.681793	0.999802	21	0.666667	0.883495	0.427027	0.9991
CDKL5	CCDS14186.1	348	333	363	0.754579	16	0.6875	0.911104	0.681793	0.999605	22	0.681818	0.903575	0.563327	0.9992
CDKL5	CCDS14186.1	349	334	364	0.761029	15	0.666667	0.876006	0.500197	0.999506	21	0.666667	0.876006	0.414173	0.999133
CDKL5	CCDS14186.1	350	335	365	0.768382	14	0.714286	0.929597	0.664778	0.999407	21	0.714286	0.929597	0.702124	0.9991
CDKL5	CCDS14186.1	351	336	366	0.772894	15	0.666667	0.862559	0.481559	0.999264	22	0.681818	0.882163	0.415452	0.999167
CDKL5	CCDS14186.1	352	337	367	0.762774	15	0.666667	0.874003	0.497117	0.999572	22	0.681818	0.893867	0.555969	0.9992
CDKL5	CCDS14186.1	353	338	368	0.770073	16	0.6875	0.892773	0.513612	0.999736	23	0.652174	0.846899	0.31008	0.9992
CDKL5	CCDS14186.1	354	339	369	0.761905	14	0.642857	0.84375	0.472302	0.999868	22	0.636364	0.835227	0.303864	0.999133
CDKL5	CCDS14186.1	355	340	370	0.761905	14	0.642857	0.84375	0.472302	0.999802	22	0.681818	0.894886	0.556517	0.9992
CDKL5	CCDS14186.1	356	341	371	0.759124	14	0.642857	0.846841	0.475478	0.999736	22	0.681818	0.898164	0.558791	0.999167
CDKL5	CCDS14186.1	357	342	372	0.759124	16	0.5625	0.740986	0.1649	0.999736	24	0.625	0.823317	0.23802	0.9992
CDKL5	CCDS14186.1	358	343	373	0.750916	16	0.5625	0.749085	0.178642	0.999769	25	0.64	0.852293	0.346048	0.999267
CDKL5	CCDS14186.1	359	344	374	0.74359	16	0.5	0.672414	0.105682	0.999868	25	0.6	0.806897	0.188768	0.9994
CDKL5	CCDS14186.1	360	345	375	0.744526	16	0.5	0.671569	0.104975	1	25	0.6	0.805882	0.187234	0.9992
CDKL5	CCDS14186.1	361	346	376	0.737226	16	0.5	0.678218	0.111767	0.999868	25	0.6	0.813861	0.259195	0.9992
CDKL5	CCDS14186.1	362	347	377	0.740876	15	0.533333	0.719869	0.164153	0.999802	23	0.608696	0.821589	0.245171	0.9992
CDKL5	CCDS14186.1	363	348	378	0.734545	16	0.5	0.680693	0.1146	0.999802	24	0.583333	0.794142	0.18351	0.999267
CDKL5	CCDS14186.1	364	349	379	0.723636	16	0.5	0.690955	0.127429	0.999802	25	0.6	0.829146	0.272332	0.9994
CDKL5	CCDS14186.1	365	350	380	0.734545	15	0.466667	0.635314	0.0962511	0.999802	25	0.6	0.816832	0.260364	0.9994
CDKL5	CCDS14186.1	366	351	381	0.727273	15	0.466667	0.641667	0.101095	0.999802	25	0.6	0.825	0.267301	0.9994
CDKL5	CCDS14186.1	367	352	382	0.733577	15	0.466667	0.636153	0.0967059	0.999736	24	0.583333	0.795191	0.184804	0.9994
CDKL5	CCDS14186.1	368	353	383	0.733577	14	0.428571	0.584222	0.058528	0.999703	23	0.565217	0.770495	0.169061	0.999467
CDKL5	CCDS14186.1	369	354	384	0.742647	14	0.428571	0.577086	0.0514398	0.999769	22	0.545455	0.734473	0.101775	0.9995
CDKL5	CCDS14186.1	370	355	385	0.749077	15	0.466667	0.622989	0.0893946	0.999802	22	0.545455	0.728168	0.0962742	0.9995
CDKL5	CCDS14186.1	371	356	386	0.752768	14	0.428571	0.569328	0.0444965	0.999802	21	0.52381	0.695845	0.0580446	0.9995
CDKL5	CCDS14186.1	372	357	387	0.760148	14	0.428571	0.5638	0.0395044	0.999802	21	0.52381	0.689089	0.0525059	0.9995
CDKL5	CCDS14186.1	373	358	388	0.760148	14	0.5	0.657767	0.125615	0.999802	21	0.571429	0.751734	0.131502	0.9995
CDKL5	CCDS14186.1	374	359	389	0.760148	13	0.461538	0.60717	0.0674688	0.999802	21	0.52381	0.689089	0.0525059	0.999567
CDKL5	CCDS14186.1	375	360	390	0.760148	13	0.461538	0.60717	0.0674688	0.999802	21	0.52381	0.689089	0.0525059	0.9995
CDKL5	CCDS14186.1	376	361	391	0.760148	13	0.461538	0.60717	0.0674688	0.999802	20	0.55	0.723544	0.0823912	0.9995
CDKL5	CCDS14186.1	377	362	392	0.760148	13	0.461538	0.60717	0.0674688	0.999736	20	0.55	0.723544	0.0823912	0.9994
CDKL5	CCDS14186.1	378	363	393	0.760148	12	0.5	0.657767	0.114336	0.999802	19	0.578947	0.761625	0.176794	0.9992
CDKL5	CCDS14186.1	379	364	394	0.760148	11	0.454545	0.59797	0.0843043	0.999868	17	0.529412	0.696459	0.0910144	0.9994
CDKL5	CCDS14186.1	380	365	395	0.760148	11	0.454545	0.59797	0.0843043	1	17	0.529412	0.696459	0.0910144	0.9994
CDKL5	CCDS14186.1	381	366	396	0.760148	12	0.5	0.657767	0.114336	1	17	0.529412	0.696459	0.0910144	0.999333
CDKL5	CCDS14186.1	382	367	397	0.752768	11	0.545455	0.724599	0.261878	1	16	0.5625	0.747243	0.157276	0.9992
CDKL5	CCDS14186.1	383	368	398	0.756458	10	0.6	0.793171	0.391637	1	16	0.625	0.82622	0.344847	0.999267
CDKL5	CCDS14186.1	384	369	399	0.756458	10	0.6	0.793171	0.391637	1	16	0.6875	0.908841	0.662055	0.999333
CDKL5	CCDS14186.1	385	370	400	0.764706	10	0.6	0.784615	0.379238	1	16	0.6875	0.899038	0.65592	0.9992
CDKL5	CCDS14186.1	386	371	401	0.764706	10	0.6	0.784615	0.379238	0.999868	16	0.6875	0.899038	0.65592	0.999167
CDKL5	CCDS14186.1	387	372	402	0.768382	9	0.555556	0.72302	0.347938	0.999802	15	0.666667	0.867624	0.467511	0.9991
CDKL5	CCDS14186.1	388	373	403	0.768382	7	0.714286	0.929597	0.774227	0.999802	13	0.769231	1.0011	1	0.9991
CDKL5	CCDS14186.1	389	374	404	0.776557	7	0.714286	0.919811	0.766414	0.999802	12	0.75	0.965802	0.824349	0.9989
CDKL5	CCDS14186.1	390	375	405	0.776557	6	0.833333	1.07311	1	0.999802	11	0.818182	1.0536	1	0.9989
CDKL5	CCDS14186.1	391	376	406	0.769231	6	0.833333	1.08333	1	0.999868	11	0.818182	1.06364	1	0.9989
CDKL5	CCDS14186.1	392	377	407	0.776557	6	0.833333	1.07311	1	0.999703	11	0.818182	1.0536	1	0.9989
CDKL5	CCDS14186.1	393	378	408	0.769231	6	0.833333	1.08333	1	0.999802	11	0.818182	1.06364	1	0.9989
CDKL5	CCDS14186.1	394	379	409	0.775735	6	1	1.2891	0.476666	0.999802	11	0.909091	1.17191	0.580562	0.9989
CDKL5	CCDS14186.1	395	380	410	0.785978	7	1	1.2723	0.485544	0.999802	11	0.909091	1.15664	0.581668	0.998867
CDKL5	CCDS14186.1	396	381	411	0.778598	7	1	1.28436	0.487132	0.999703	12	0.833333	1.0703	1	0.9988
CDKL5	CCDS14186.1	397	382	412	0.785185	8	1	1.27358	0.33539	0.999703	13	0.846154	1.07765	0.833477	0.998733
CDKL5	CCDS14186.1	398	383	413	0.776952	8	1	1.28708	0.332501	0.999703	13	0.846154	1.08907	0.831795	0.998533
CDKL5	CCDS14186.1	399	384	414	0.783582	8	1	1.27619	0.334845	0.999703	13	0.846154	1.07985	0.83309	0.9984
CDKL5	CCDS14186.1	400	385	415	0.777778	9	1	1.28571	0.342519	0.999703	14	0.857143	1.10204	0.834178	0.998333
CDKL5	CCDS14186.1	401	386	416	0.777778	8	1	1.28571	0.332774	0.999539	13	0.846154	1.08791	0.831855	0.998367
CDKL5	CCDS14186.1	402	387	417	0.785185	8	1	1.27358	0.33539	0.999407	13	0.846154	1.07765	0.833477	0.998167
CDKL5	CCDS14186.1	403	388	418	0.785185	7	1	1.27358	0.485581	0.999407	12	0.833333	1.06132	1	0.997933
CDKL5	CCDS14186.1	404	389	419	0.785185	6	1	1.27358	0.479999	0.999407	12	0.833333	1.06132	1	0.997667
CDKL5	CCDS14186.1	405	390	420	0.785978	6	1	1.2723	0.480397	0.999407	11	0.909091	1.15664	0.581668	0.997467
CDKL5	CCDS14186.1	406	391	421	0.789668	6	1	1.26636	0.481956	0.999336	11	0.909091	1.15123	0.58305	0.997467
CDKL5	CCDS14186.1	407	392	422	0.797048	7	0.857143	1.0754	1	0.99916	12	0.833333	1.04552	1	0.997433
CDKL5	CCDS14186.1	408	393	423	0.797048	7	0.857143	1.0754	1	0.999193	12	0.833333	1.04552	1	0.997367
CDKL5	CCDS14186.1	409	394	424	0.803704	7	0.857143	1.06649	1	0.999127	11	0.818182	1.01801	1	0.9974
CDKL5	CCDS14186.1	410	395	425	0.796296	7	0.857143	1.07641	1	0.999264	11	0.818182	1.02748	1	0.997
CDKL5	CCDS14186.1	411	396	426	0.788104	8	0.75	0.951651	0.786412	0.999193	12	0.75	0.951651	0.813943	0.997067
CDKL5	CCDS14186.1	412	397	427	0.787313	7	0.714286	0.907244	0.755318	0.999193	11	0.727273	0.92374	0.800253	0.997067
CDKL5	CCDS14186.1	413	398	428	0.787313	7	0.714286	0.907244	0.755318	0.999231	12	0.666667	0.846761	0.400167	0.997333
CDKL5	CCDS14186.1	414	399	429	0.787313	7	0.714286	0.907244	0.755318	0.999193	12	0.666667	0.846761	0.400167	0.997267
CDKL5	CCDS14186.1	415	400	430	0.779851	6	0.666667	0.854864	0.732296	0.999193	11	0.636364	0.816007	0.375455	0.997267
CDKL5	CCDS14186.1	416	401	431	0.772388	6	0.666667	0.863124	0.736902	0.999193	11	0.636364	0.823891	0.387807	0.997267
CDKL5	CCDS14186.1	417	402	432	0.771536	6	0.666667	0.864078	0.737415	0.999336	10	0.6	0.77767	0.352435	0.997333
CDKL5	CCDS14186.1	418	403	433	0.773585	7	0.714286	0.923345	0.769191	0.999407	11	0.636364	0.822616	0.385734	0.997133
CDKL5	CCDS14186.1	419	404	434	0.773585	7	0.714286	0.923345	0.769191	0.999407	11	0.636364	0.822616	0.385734	0.997133
CDKL5	CCDS14186.1	420	405	435	0.772727	8	0.75	0.970588	1	0.999407	12	0.666667	0.862745	0.592764	0.9974
CDKL5	CCDS14186.1	421	406	436	0.770992	8	0.75	0.972772	1	0.999407	12	0.666667	0.864686	0.594028	0.997267
CDKL5	CCDS14186.1	422	407	437	0.778626	8	0.75	0.963235	0.798045	0.999407	12	0.666667	0.856209	0.419167	0.997433
CDKL5	CCDS14186.1	423	408	438	0.778626	8	0.75	0.963235	0.798045	0.999506	12	0.666667	0.856209	0.419167	0.997733
CDKL5	CCDS14186.1	424	409	439	0.781609	8	0.75	0.959559	0.794484	0.999473	12	0.666667	0.852941	0.412234	0.9978
CDKL5	CCDS14186.1	425	410	440	0.774809	7	0.714286	0.921886	0.768145	0.999193	11	0.636364	0.821317	0.383673	0.997733
CDKL5	CCDS14186.1	426	411	441	0.774809	6	0.666667	0.860427	0.735168	0.999264	10	0.6	0.774384	0.3487	0.997567
CDKL5	CCDS14186.1	427	412	442	0.781609	6	0.666667	0.852941	0.731523	0.999336	9	0.666667	0.852941	0.525979	0.9975
CDKL5	CCDS14186.1	428	413	443	0.782443	5	0.6	0.766829	0.423267	0.999193	8	0.625	0.79878	0.490288	0.997567
CDKL5	CCDS14186.1	429	414	444	0.784091	7	0.571429	0.728778	0.288513	0.999336	11	0.636364	0.811594	0.368806	0.997767
CDKL5	CCDS14186.1	430	415	445	0.784906	7	0.571429	0.728022	0.286457	0.99944	11	0.636364	0.810752	0.367636	0.9978
CDKL5	CCDS14186.1	431	416	446	0.78327	7	0.428571	0.547157	0.112023	0.999473	11	0.545455	0.696381	0.131637	0.997867
CDKL5	CCDS14186.1	432	417	447	0.784091	8	0.5	0.637681	0.154635	0.999506	13	0.615385	0.784838	0.260679	0.998067
CDKL5	CCDS14186.1	433	418	448	0.787879	8	0.5	0.634615	0.14925	0.999264	13	0.615385	0.781065	0.255744	0.998133
CDKL5	CCDS14186.1	434	419	449	0.787072	8	0.5	0.635266	0.150374	0.99916	13	0.615385	0.781865	0.256821	0.998167
CDKL5	CCDS14186.1	435	420	450	0.787072	8	0.5	0.635266	0.150374	0.999193	12	0.583333	0.741143	0.235676	0.9983
CDKL5	CCDS14186.1	436	421	451	0.779468	8	0.5	0.641463	0.162274	0.999061	12	0.583333	0.748374	0.242343	0.998233
CDKL5	CCDS14186.1	437	422	452	0.782443	8	0.5	0.639024	0.157338	0.999094	12	0.583333	0.745528	0.239542	0.9981
CDKL5	CCDS14186.1	438	423	453	0.782443	7	0.571429	0.730314	0.292523	0.999506	11	0.636364	0.813304	0.371472	0.998067
CDKL5	CCDS14186.1	439	424	454	0.789272	7	0.571429	0.723994	0.276837	0.999638	11	0.636364	0.806267	0.361051	0.998167
CDKL5	CCDS14186.1	440	425	455	0.782443	7	0.571429	0.730314	0.292523	0.999539	11	0.636364	0.813304	0.371472	0.9983
CDKL5	CCDS14186.1	441	426	456	0.782443	8	0.625	0.79878	0.510564	0.999264	11	0.636364	0.813304	0.371472	0.9983
CDKL5	CCDS14186.1	442	427	457	0.784091	7	0.714286	0.910973	0.758832	0.999193	10	0.7	0.892754	0.564394	0.9983
CDKL5	CCDS14186.1	443	428	458	0.773585	7	0.714286	0.923345	0.769191	0.99933	10	0.7	0.904878	0.794271	0.998133
CDKL5	CCDS14186.1	444	429	459	0.780303	7	0.714286	0.915395	0.762628	0.999703	9	0.777778	0.996764	1	0.998167
CDKL5	CCDS14186.1	445	430	460	0.780303	7	0.714286	0.915395	0.762628	0.999703	8	0.75	0.961165	0.781178	0.9983
CDKL5	CCDS14186.1	446	431	461	0.787879	10	0.8	1.01538	1	0.999703	11	0.818182	1.03846	1	0.998367
CDKL5	CCDS14186.1	447	432	462	0.794677	11	0.818182	1.02958	1	0.999638	12	0.833333	1.04864	1	0.9984
CDKL5	CCDS14186.1	448	433	463	0.794677	13	0.769231	0.967979	0.827439	0.999506	14	0.785714	0.988722	1	0.9983
CDKL5	CCDS14186.1	449	434	464	0.795455	12	0.75	0.942857	0.816383	0.999572	13	0.769231	0.967033	0.823991	0.998167
CDKL5	CCDS14186.1	450	435	465	0.80303	12	0.75	0.933962	0.813636	0.999473	15	0.8	0.996226	1	0.998033
CDKL5	CCDS14186.1	451	436	466	0.792453	12	0.75	0.946429	0.818065	0.99944	15	0.8	1.00952	1	0.997833
CDKL5	CCDS14186.1	452	437	467	0.801498	13	0.769231	0.959741	0.823494	0.999506	16	0.8125	1.01373	1	0.9977
CDKL5	CCDS14186.1	453	438	468	0.801498	13	0.769231	0.959741	0.823494	0.999506	16	0.8125	1.01373	1	0.9977
CDKL5	CCDS14186.1	454	439	469	0.8	13	0.769231	0.961538	0.824516	0.999264	16	0.8125	1.01562	1	0.997567
CDKL5	CCDS14186.1	455	440	470	0.800752	13	0.769231	0.960636	0.823893	0.999336	16	0.8125	1.01467	1	0.9974
CDKL5	CCDS14186.1	456	441	471	0.808271	13	0.769231	0.951699	0.819498	0.999264	16	0.8125	1.00523	1	0.997167
CDKL5	CCDS14186.1	457	442	472	0.801498	13	0.769231	0.959741	0.823494	0.999264	16	0.8125	1.01373	1	0.996767
CDKL5	CCDS14186.1	458	443	473	0.798507	13	0.769231	0.963336	0.824887	0.999336	16	0.8125	1.01752	1	0.996667
CDKL5	CCDS14186.1	459	444	474	0.791045	14	0.714286	0.902965	0.631256	0.999028	17	0.764706	0.966704	0.849024	0.996133
CDKL5	CCDS14186.1	460	445	475	0.797753	12	0.75	0.940141	0.815353	0.99883	15	0.733333	0.919249	0.625808	0.995567
CDKL5	CCDS14186.1	461	446	476	0.790262	12	0.75	0.949052	0.819498	0.99883	15	0.733333	0.927962	0.6377	0.9953
CDKL5	CCDS14186.1	462	447	477	0.791822	12	0.75	0.947183	0.818606	0.998797	15	0.733333	0.926135	0.635132	0.9952
CDKL5	CCDS14186.1	463	448	478	0.788104	11	0.727273	0.922813	0.810899	0.998204	14	0.642857	0.815701	0.28616	0.994967
CDKL5	CCDS14186.1	464	449	479	0.784387	11	0.727273	0.927187	0.812233	0.998204	14	0.642857	0.819567	0.294297	0.994867
CDKL5	CCDS14186.1	465	450	480	0.777778	11	0.727273	0.935065	0.815003	0.998073	14	0.642857	0.826531	0.309472	0.994133
CDKL5	CCDS14186.1	466	451	481	0.77037	12	0.75	0.973558	0.831788	0.997864	15	0.666667	0.865385	0.464317	0.993733
CDKL5	CCDS14186.1	467	452	482	0.776119	12	0.75	0.966346	0.827455	0.99776	16	0.625	0.805288	0.2322	0.993533
CDKL5	CCDS14186.1	468	453	483	0.773234	13	0.769231	0.994822	1	0.997595	17	0.647059	0.836821	0.345144	0.993067
CDKL5	CCDS14186.1	469	454	484	0.765799	13	0.769231	1.00448	1	0.997397	18	0.611111	0.798004	0.24791	0.993033
CDKL5	CCDS14186.1	470	455	485	0.765799	13	0.769231	1.00448	1	0.996903	18	0.611111	0.798004	0.24791	0.993133
CDKL5	CCDS14186.1	471	456	486	0.765799	13	0.769231	1.00448	1	0.9972	18	0.611111	0.798004	0.24791	0.992633
CDKL5	CCDS14186.1	472	457	487	0.772388	12	0.75	0.971014	0.830508	0.997035	18	0.611111	0.791197	0.242346	0.992233
CDKL5	CCDS14186.1	473	458	488	0.779851	12	0.75	0.961722	0.82512	0.997266	18	0.611111	0.783626	0.164665	0.991867
CDKL5	CCDS14186.1	474	459	489	0.791045	12	0.75	0.948113	0.819077	0.997233	19	0.631579	0.798411	0.167965	0.991867
CDKL5	CCDS14186.1	475	460	490	0.784387	12	0.75	0.956161	0.823172	0.99687	20	0.6	0.764929	0.11367	0.991167
CDKL5	CCDS14186.1	476	461	491	0.784387	12	0.75	0.956161	0.823172	0.996969	20	0.6	0.764929	0.11367	0.9904
CDKL5	CCDS14186.1	477	462	492	0.773234	9	0.666667	0.862179	0.556445	0.996535	17	0.529412	0.684672	0.0818712	0.9895
CDKL5	CCDS14186.1	478	463	493	0.774074	8	0.625	0.807416	0.517826	0.996398	16	0.5	0.645933	0.0448036	0.989433
CDKL5	CCDS14186.1	479	464	494	0.774908	6	0.666667	0.860317	0.735168	0.996568	14	0.5	0.645238	0.0587534	0.988367
CDKL5	CCDS14186.1	480	465	495	0.768382	6	0.666667	0.867624	0.739895	0.995964	14	0.5	0.650718	0.0650282	0.987767
CDKL5	CCDS14186.1	481	466	496	0.767528	6	0.666667	0.86859	0.74059	0.996601	12	0.416667	0.542869	0.0331659	0.9886
CDKL5	CCDS14186.1	482	467	497	0.771218	5	0.6	0.77799	0.449452	0.996936	11	0.363636	0.471509	0.0199959	0.9901
CDKL5	CCDS14186.1	483	468	498	0.763838	4	0.5	0.654589	0.359552	0.996535	10	0.3	0.392754	0.0135158	0.990267
CDKL5	CCDS14186.1	484	469	499	0.763838	4	0.5	0.654589	0.359552	0.996799	10	0.3	0.392754	0.0135158	0.9902
CDKL5	CCDS14186.1	485	470	500	0.765568	4	0.5	0.65311	0.356788	0.997397	10	0.3	0.391866	0.0131174	0.9902
CDKL5	CCDS14186.1	486	471	501	0.761905	4	0.5	0.65625	0.362619	0.997496	10	0.3	0.39375	0.0139925	0.991033
CDKL5	CCDS14186.1	487	472	502	0.754579	4	0.5	0.662621	0.374042	0.997864	10	0.3	0.397573	0.0158261	0.991867
CDKL5	CCDS14186.1	488	473	503	0.761029	4	0.5	0.657005	0.364053	0.997727	11	0.363636	0.477822	0.0236797	0.993333
CDKL5	CCDS14186.1	489	474	504	0.757353	4	0.5	0.660194	0.369422	0.997694	11	0.363636	0.480141	0.0253188	0.994533
CDKL5	CCDS14186.1	490	475	505	0.761029	3	0.666667	0.876006	0.679137	0.99743	10	0.4	0.525604	0.0467024	0.994667
CDKL5	CCDS14186.1	491	476	506	0.754579	3	0.666667	0.883495	0.689175	0.997463	10	0.5	0.662621	0.138071	0.995
CDKL5	CCDS14186.1	492	477	507	0.761029	3	0.666667	0.876006	0.679137	0.998133	10	0.5	0.657005	0.128206	0.995033
CDKL5	CCDS14186.1	493	478	508	0.764706	3	1	1.30769	1	0.998468	10	0.6	0.784615	0.360563	0.995367
CDKL5	CCDS14186.1	494	479	509	0.761029	5	0.8	1.05121	1	0.998435	11	0.636364	0.836188	0.410519	0.995733
CDKL5	CCDS14186.1	495	480	510	0.760148	5	0.8	1.05243	1	0.998732	11	0.636364	0.837158	0.411962	0.996167
CDKL5	CCDS14186.1	496	481	511	0.760148	5	0.8	1.05243	1	0.998732	12	0.666667	0.877023	0.602904	0.9963
CDKL5	CCDS14186.1	497	482	512	0.767528	4	0.75	0.977163	1	0.99883	11	0.636364	0.829108	0.39725	0.9966
CDKL5	CCDS14186.1	498	483	513	0.761905	4	0.75	0.984375	1	0.998896	10	0.7	0.91875	0.800028	0.996833
CDKL5	CCDS14186.1	499	484	514	0.765568	3	0.666667	0.870813	0.672226	0.998896	9	0.666667	0.870813	0.552194	0.996767
CDKL5	CCDS14186.1	500	485	515	0.769231	3	0.666667	0.866667	0.665635	0.998863	8	0.75	0.975	1	0.9971
CDKL5	CCDS14186.1	501	486	516	0.768382	4	0.5	0.650718	0.352818	0.998732	9	0.666667	0.867624	0.54751	0.997367
CDKL5	CCDS14186.1	502	487	517	0.775735	4	0.5	0.64455	0.339178	0.998402	9	0.666667	0.8594	0.534913	0.9974
CDKL5	CCDS14186.1	503	488	518	0.769231	5	0.4	0.52	0.172319	0.998468	10	0.6	0.78	0.354838	0.997067
CDKL5	CCDS14186.1	504	489	519	0.761905	5	0.4	0.525	0.18335	0.998666	10	0.6	0.7875	0.364413	0.997133
CDKL5	CCDS14186.1	505	490	520	0.761905	5	0.4	0.525	0.18335	0.998863	9	0.555556	0.729167	0.331727	0.997567
CDKL5	CCDS14186.1	506	491	521	0.768382	5	0.4	0.520574	0.173577	0.99883	8	0.625	0.813397	0.50415	0.9975
CDKL5	CCDS14186.1	507	492	522	0.77037	6	0.5	0.649038	0.245118	0.998732	9	0.666667	0.865385	0.544135	0.997667
CDKL5	CCDS14186.1	508	493	523	0.781481	6	0.5	0.63981	0.225981	0.998468	9	0.666667	0.853081	0.526104	0.998067
CDKL5	CCDS14186.1	509	494	524	0.776952	6	0.5	0.643541	0.234727	0.998402	9	0.666667	0.858054	0.532926	0.998033
CDKL5	CCDS14186.1	510	495	525	0.776952	6	0.5	0.643541	0.234727	0.998468	9	0.666667	0.858054	0.532926	0.9978
CDKL5	CCDS14186.1	511	496	526	0.776952	6	0.5	0.643541	0.234727	0.998369	10	0.7	0.900957	0.578697	0.998067
CDKL5	CCDS14186.1	512	497	527	0.77037	7	0.571429	0.741758	0.320485	0.998336	11	0.727273	0.944056	0.811138	0.9986
CDKL5	CCDS14186.1	513	498	528	0.77037	7	0.571429	0.741758	0.320485	0.998402	11	0.727273	0.944056	0.811138	0.9986
CDKL5	CCDS14186.1	514	499	529	0.777778	8	0.625	0.803571	0.514173	0.998402	12	0.75	0.964286	0.823293	0.998933
CDKL5	CCDS14186.1	515	500	530	0.77037	8	0.625	0.811298	0.521159	0.998534	12	0.75	0.973558	0.829906	0.999133
CDKL5	CCDS14186.1	516	501	531	0.762963	9	0.666667	0.873786	0.574123	0.9986	13	0.769231	1.00822	1	0.9992
CDKL5	CCDS14186.1	517	502	532	0.762963	9	0.666667	0.873786	0.574123	0.998797	13	0.769231	1.00822	1	0.999133
CDKL5	CCDS14186.1	518	503	533	0.762963	9	0.666667	0.873786	0.574123	0.9986	13	0.769231	1.00822	1	0.999167
CDKL5	CCDS14186.1	519	504	534	0.759259	10	0.7	0.921951	0.812102	0.998468	13	0.769231	1.01313	1	0.9992
CDKL5	CCDS14186.1	520	505	535	0.766667	10	0.7	0.913043	0.809221	0.998863	13	0.769231	1.00334	1	0.9992
CDKL5	CCDS14186.1	521	506	536	0.77037	10	0.7	0.908654	0.807486	0.998962	13	0.769231	0.998521	1	0.999333
CDKL5	CCDS14186.1	522	507	537	0.777778	10	0.7	0.9	0.594106	0.999231	12	0.75	0.964286	0.823293	0.9992
CDKL5	CCDS14186.1	523	508	538	0.771218	11	0.636364	0.825141	0.410822	0.999407	14	0.714286	0.926179	0.642266	0.999133
CDKL5	CCDS14186.1	524	509	539	0.77037	10	0.6	0.778846	0.372128	0.999264	14	0.714286	0.927198	0.643559	0.9992
CDKL5	CCDS14186.1	525	510	540	0.77037	8	0.625	0.811298	0.521159	0.999264	12	0.75	0.973558	0.829906	0.9992
CDKL5	CCDS14186.1	526	511	541	0.766667	8	0.625	0.815217	0.524319	0.999407	12	0.75	0.978261	1	0.9991
CDKL5	CCDS14186.1	527	512	542	0.766667	8	0.625	0.815217	0.524319	0.999407	11	0.727273	0.948617	0.813905	0.9991
CDKL5	CCDS14186.1	528	513	543	0.766667	8	0.625	0.815217	0.524319	0.999473	11	0.727273	0.948617	0.813905	0.999133
CDKL5	CCDS14186.1	529	514	544	0.766667	9	0.555556	0.724638	0.348913	0.999769	12	0.666667	0.869565	0.597336	0.9992
CDKL5	CCDS14186.1	530	515	545	0.759259	9	0.555556	0.731707	0.354452	0.999769	12	0.666667	0.878049	0.603889	0.999133
CDKL5	CCDS14186.1	531	516	546	0.754647	9	0.555556	0.73618	0.357383	0.999703	12	0.666667	0.883415	0.60839	0.999133
CDKL5	CCDS14186.1	532	517	547	0.751852	8	0.625	0.831281	0.542431	0.999736	11	0.727273	0.967309	0.826874	0.9991
CDKL5	CCDS14186.1	533	518	548	0.751852	8	0.625	0.831281	0.542431	0.999638	11	0.727273	0.967309	0.826874	0.9991
CDKL5	CCDS14186.1	534	519	549	0.759259	7	0.714286	0.940767	0.783627	0.999638	10	0.8	1.05366	1	0.9991
CDKL5	CCDS14186.1	535	520	550	0.754647	8	0.75	0.993842	1	0.999703	11	0.818182	1.08419	1	0.9992
CDKL5	CCDS14186.1	536	521	551	0.754647	8	0.75	0.993842	1	0.999703	11	0.818182	1.08419	1	0.999267
CDKL5	CCDS14186.1	537	522	552	0.754647	8	0.75	0.993842	1	0.999769	11	0.818182	1.08419	1	0.9994
CDKL5	CCDS14186.1	538	523	553	0.751852	7	0.714286	0.950035	0.792534	0.999736	11	0.818182	1.08822	1	0.999333
CDKL5	CCDS14186.1	539	524	554	0.744444	8	0.625	0.839552	0.55318	0.999703	13	0.769231	1.0333	1	0.9992
CDKL5	CCDS14186.1	540	525	555	0.738007	9	0.555556	0.752778	0.373995	0.999703	14	0.714286	0.967857	0.850197	0.999133
CDKL5	CCDS14186.1	541	526	556	0.738007	9	0.555556	0.752778	0.373995	0.999703	14	0.714286	0.967857	0.850197	0.999033
CDKL5	CCDS14186.1	542	527	557	0.736059	9	0.555556	0.75477	0.375853	0.999703	14	0.642857	0.873377	0.646239	0.998967
CDKL5	CCDS14186.1	543	528	558	0.736059	10	0.6	0.815152	0.429448	0.999703	14	0.642857	0.873377	0.646239	0.9988
CDKL5	CCDS14186.1	544	529	559	0.731343	10	0.6	0.820408	0.59709	0.999802	14	0.642857	0.879009	0.648423	0.998667
CDKL5	CCDS14186.1	545	530	560	0.723881	10	0.6	0.828866	0.600937	0.999703	14	0.642857	0.888071	0.65334	0.9986
CDKL5	CCDS14186.1	546	531	561	0.723881	10	0.6	0.828866	0.600937	0.999802	14	0.642857	0.888071	0.65334	0.9986
CDKL5	CCDS14186.1	547	532	562	0.723881	10	0.6	0.828866	0.600937	0.999802	14	0.642857	0.888071	0.65334	0.9986
CDKL5	CCDS14186.1	548	533	563	0.726592	10	0.6	0.825773	0.599139	0.999802	14	0.642857	0.884757	0.65158	0.998533
CDKL5	CCDS14186.1	549	534	564	0.734082	11	0.545455	0.743043	0.286878	0.999802	15	0.6	0.817347	0.349289	0.998533
CDKL5	CCDS14186.1	550	535	565	0.731343	10	0.5	0.683673	0.252658	0.999736	14	0.571429	0.781341	0.324446	0.9986
CDKL5	CCDS14186.1	551	536	566	0.730337	10	0.5	0.684615	0.25352	0.999802	14	0.571429	0.782418	0.325525	0.998667
CDKL5	CCDS14186.1	552	537	567	0.722846	11	0.454545	0.628827	0.170938	0.999802	15	0.533333	0.737824	0.231896	0.998867
CDKL5	CCDS14186.1	553	538	568	0.726592	11	0.454545	0.625586	0.168626	0.999868	15	0.533333	0.734021	0.229225	0.9986
CDKL5	CCDS14186.1	554	539	569	0.733083	10	0.5	0.682051	0.251053	0.999934	13	0.538462	0.734517	0.205189	0.9986
CDKL5	CCDS14186.1	555	540	570	0.736842	10	0.5	0.678571	0.248617	0.999868	12	0.5	0.678571	0.167397	0.998633
CDKL5	CCDS14186.1	556	541	571	0.739623	12	0.416667	0.56335	0.0644458	0.999802	14	0.428571	0.579446	0.0417428	0.9989
CDKL5	CCDS14186.1	557	542	572	0.743396	12	0.416667	0.560491	0.0611487	0.999934	14	0.428571	0.576505	0.0393929	0.999033
CDKL5	CCDS14186.1	558	543	573	0.739623	12	0.416667	0.56335	0.0644458	1	14	0.428571	0.579446	0.0417428	0.999133
CDKL5	CCDS14186.1	559	544	574	0.732075	14	0.428571	0.58542	0.0598194	1	16	0.4375	0.597616	0.0530502	0.999067
CDKL5	CCDS14186.1	560	545	575	0.738636	14	0.428571	0.58022	0.0544956	1	16	0.4375	0.592308	0.0351185	0.9991
CDKL5	CCDS14186.1	561	546	576	0.746212	14	0.428571	0.574329	0.0486842	1	17	0.470588	0.630636	0.0562181	0.998733
CDKL5	CCDS14186.1	562	547	577	0.758491	16	0.5	0.659204	0.0955105	0.999934	20	0.55	0.725124	0.0842856	0.998733
CDKL5	CCDS14186.1	563	548	578	0.763158	16	0.5	0.655172	0.0932022	1	21	0.571429	0.748768	0.129329	0.9988
CDKL5	CCDS14186.1	564	549	579	0.763158	16	0.5	0.655172	0.0932022	1	21	0.571429	0.748768	0.129329	0.9989
CDKL5	CCDS14186.1	565	550	580	0.763158	16	0.5	0.655172	0.0932022	1	21	0.571429	0.748768	0.129329	0.999033
CDKL5	CCDS14186.1	566	551	581	0.775281	15	0.466667	0.601932	0.0424831	0.999802	20	0.55	0.70942	0.0677604	0.9989
CDKL5	CCDS14186.1	567	552	582	0.76779	15	0.466667	0.607805	0.0479974	0.999868	20	0.55	0.716341	0.0743017	0.9988
CDKL5	CCDS14186.1	568	553	583	0.768657	15	0.466667	0.60712	0.0474603	1	21	0.571429	0.743412	0.0883279	0.998667
CDKL5	CCDS14186.1	569	554	584	0.76779	15	0.466667	0.607805	0.0479974	1	21	0.52381	0.68223	0.0475437	0.9986
CDKL5	CCDS14186.1	570	555	585	0.764045	16	0.4375	0.57261	0.0298227	1	20	0.5	0.654412	0.0425656	0.998233
CDKL5	CCDS14186.1	571	556	586	0.76779	15	0.466667	0.607805	0.0479974	1	19	0.526316	0.685494	0.0630669	0.997933
CDKL5	CCDS14186.1	572	557	587	0.7603	15	0.466667	0.613793	0.0538573	1	19	0.526316	0.692248	0.0680405	0.9978
CDKL5	CCDS14186.1	573	558	588	0.762082	16	0.5	0.656098	0.0936738	1	18	0.555556	0.728997	0.106191	0.997767
CDKL5	CCDS14186.1	574	559	589	0.769517	15	0.4	0.519807	0.01954	1	18	0.5	0.649758	0.0376429	0.997567
CDKL5	CCDS14186.1	575	560	590	0.780669	16	0.4375	0.560417	0.0221638	1	19	0.526316	0.674185	0.0577858	0.9972
CDKL5	CCDS14186.1	576	561	591	0.780669	15	0.4	0.512381	0.0162165	1	18	0.5	0.640476	0.0299808	0.997733
CDKL5	CCDS14186.1	577	562	592	0.788104	15	0.4	0.507547	0.0142854	1	18	0.5	0.634434	0.025413	0.997967
CDKL5	CCDS14186.1	578	563	593	0.788104	14	0.357143	0.453167	0.00993165	1	17	0.470588	0.597114	0.0183557	0.998067
CDKL5	CCDS14186.1	579	564	594	0.791045	15	0.333333	0.421384	0.00482821	0.999802	18	0.444444	0.561845	0.00882638	0.998067
CDKL5	CCDS14186.1	580	565	595	0.782772	14	0.357143	0.456254	0.0108633	0.999802	17	0.470588	0.601182	0.0205412	0.997967
CDKL5	CCDS14186.1	581	566	596	0.779026	15	0.333333	0.427885	0.00619613	0.999802	18	0.444444	0.570513	0.0119846	0.998033
CDKL5	CCDS14186.1	582	567	597	0.772388	15	0.333333	0.431562	0.00724683	0.999736	20	0.4	0.517874	0.00399005	0.9984
CDKL5	CCDS14186.1	583	568	598	0.778195	14	0.357143	0.458937	0.0120041	0.999407	19	0.421053	0.541063	0.00649139	0.998367
CDKL5	CCDS14186.1	584	569	599	0.766917	15	0.333333	0.434641	0.00816302	0.999473	20	0.4	0.521569	0.00460736	0.9984
CDKL5	CCDS14186.1	585	570	600	0.76779	17	0.352941	0.459684	0.0068427	0.999506	22	0.409091	0.532816	0.00364956	0.998533
CDKL5	CCDS14186.1	586	571	601	0.761194	18	0.333333	0.437908	0.00453306	0.999506	22	0.409091	0.537433	0.00436745	0.9986
CDKL5	CCDS14186.1	587	572	602	0.765799	16	0.375	0.489684	0.0125251	0.999336	20	0.45	0.587621	0.0128051	0.9986
CDKL5	CCDS14186.1	588	573	603	0.759259	16	0.375	0.493902	0.0141762	0.999193	20	0.45	0.592683	0.0149843	0.998733
CDKL5	CCDS14186.1	589	574	604	0.762963	16	0.375	0.491505	0.0132109	0.999193	20	0.45	0.589806	0.0136999	0.998467
CDKL5	CCDS14186.1	590	575	605	0.769517	14	0.357143	0.464113	0.0138406	0.999193	18	0.444444	0.577563	0.0150112	0.998033
CDKL5	CCDS14186.1	591	576	606	0.769517	15	0.4	0.519807	0.01954	0.99916	19	0.473684	0.615561	0.0209398	0.9981
CDKL5	CCDS14186.1	592	577	607	0.762082	15	0.4	0.524878	0.022163	0.999094	20	0.45	0.590488	0.0139925	0.998333
CDKL5	CCDS14186.1	593	578	608	0.750929	13	0.307692	0.409749	0.012569	0.998962	19	0.421053	0.560709	0.0125904	0.998167
CDKL5	CCDS14186.1	594	579	609	0.750929	14	0.285714	0.380481	0.00698437	0.999094	19	0.368421	0.49062	0.00458425	0.998333
CDKL5	CCDS14186.1	595	580	610	0.747212	14	0.285714	0.382374	0.00748228	0.999127	19	0.368421	0.493061	0.00505213	0.998233
CDKL5	CCDS14186.1	596	581	611	0.747212	14	0.285714	0.382374	0.00748228	0.999193	19	0.368421	0.493061	0.00505213	0.998033
CDKL5	CCDS14186.1	597	582	612	0.739777	14	0.285714	0.386217	0.00873405	0.999193	19	0.368421	0.498016	0.00607389	0.998167
CDKL5	CCDS14186.1	598	583	613	0.750929	14	0.285714	0.380481	0.00698437	0.999193	19	0.368421	0.49062	0.00458425	0.9984
CDKL5	CCDS14186.1	599	584	614	0.749064	14	0.285714	0.381429	0.00724683	0.999336	18	0.333333	0.445	0.00301973	0.9983
CDKL5	CCDS14186.1	600	585	615	0.750929	14	0.285714	0.380481	0.00698437	0.999264	17	0.352941	0.470006	0.00539101	0.998133
CDKL5	CCDS14186.1	601	586	616	0.754647	12	0.333333	0.441708	0.0200831	0.999407	16	0.375	0.496921	0.00927789	0.998233
CDKL5	CCDS14186.1	602	587	617	0.754647	12	0.333333	0.441708	0.0200831	0.999264	16	0.375	0.496921	0.00927789	0.998233
CDKL5	CCDS14186.1	603	588	618	0.762082	12	0.333333	0.437398	0.0179175	0.999407	16	0.375	0.492073	0.00783333	0.998067
CDKL5	CCDS14186.1	604	589	619	0.768657	11	0.272727	0.35481	0.0104914	0.999264	16	0.375	0.487864	0.00682153	0.998067
CDKL5	CCDS14186.1	605	590	620	0.761194	10	0.3	0.394118	0.0209355	0.99944	15	0.4	0.52549	0.0153984	0.9981
CDKL5	CCDS14186.1	606	591	621	0.757463	9	0.222222	0.293377	0.013582	0.999638	14	0.357143	0.471499	0.0106447	0.998033
CDKL5	CCDS14186.1	607	592	622	0.757463	9	0.222222	0.293377	0.013582	0.999703	14	0.357143	0.471499	0.0106447	0.9981
CDKL5	CCDS14186.1	608	593	623	0.756554	10	0.3	0.396535	0.0221638	0.999868	15	0.4	0.528713	0.0169439	0.998167
CDKL5	CCDS14186.1	609	594	624	0.756554	10	0.3	0.396535	0.0221638	1	15	0.4	0.528713	0.0169439	0.9979
CDKL5	CCDS14186.1	610	595	625	0.753731	9	0.333333	0.442244	0.0433885	1	14	0.428571	0.5686	0.0330766	0.997733
CDKL5	CCDS14186.1	611	596	626	0.762082	9	0.333333	0.437398	0.038898	1	14	0.428571	0.562369	0.0286005	0.9977
CDKL5	CCDS14186.1	612	597	627	0.764925	8	0.375	0.490244	0.0704156	1	13	0.461538	0.603377	0.0500897	0.997767
CDKL5	CCDS14186.1	613	598	628	0.772388	8	0.375	0.485507	0.0652706	1	11	0.545455	0.706192	0.227611	0.9978
CDKL5	CCDS14186.1	614	599	629	0.769517	8	0.375	0.487319	0.0674191	1	12	0.5	0.649758	0.0850822	0.9978
CDKL5	CCDS14186.1	615	600	630	0.776952	7	0.428571	0.551606	0.119319	1	12	0.583333	0.750797	0.244691	0.997633
CDKL5	CCDS14186.1	616	601	631	0.773234	6	0.5	0.646635	0.24044	1	11	0.636364	0.82299	0.386271	0.9977
CDKL5	CCDS14186.1	617	602	632	0.773234	5	0.6	0.775962	0.445128	1	11	0.636364	0.82299	0.386271	0.9975
CDKL5	CCDS14186.1	618	603	633	0.772388	5	0.6	0.776812	0.446898	1	11	0.636364	0.823891	0.387807	0.997767
CDKL5	CCDS14186.1	619	604	634	0.772388	5	0.6	0.776812	0.446898	1	11	0.636364	0.823891	0.387807	0.997867
CDKL5	CCDS14186.1	620	605	635	0.783582	5	0.6	0.765714	0.42076	1	12	0.666667	0.850794	0.408074	0.997867
CDKL5	CCDS14186.1	621	606	636	0.776952	6	0.666667	0.858054	0.733938	1	13	0.692308	0.891056	0.608268	0.997733
CDKL5	CCDS14186.1	622	607	637	0.77037	5	0.8	1.03846	1	1	12	0.75	0.973558	0.829906	0.9975
CDKL5	CCDS14186.1	623	608	638	0.773234	5	0.8	1.03462	1	0.999868	10	0.8	1.03462	1	0.9975
CDKL5	CCDS14186.1	624	609	639	0.773234	5	0.8	1.03462	1	0.999802	8	0.75	0.969952	1	0.997433
CDKL5	CCDS14186.1	625	610	640	0.773234	4	1	1.29327	0.697653	0.999802	7	0.857143	1.10852	1	0.997067
CDKL5	CCDS14186.1	626	611	641	0.776952	4	1	1.28708	0.698358	0.999802	7	0.857143	1.10321	1	0.997
CDKL5	CCDS14186.1	627	612	642	0.765799	4	1	1.30583	0.696534	0.999802	7	0.857143	1.11928	1	0.996833
CDKL5	CCDS14186.1	628	613	643	0.772388	4	1	1.29469	0.697475	0.999802	7	0.857143	1.10973	1	0.996633
CDKL5	CCDS14186.1	629	614	644	0.761194	4	1	1.31373	0.69612	0.999802	7	0.857143	1.12605	1	0.9966
CDKL5	CCDS14186.1	630	615	645	0.758364	4	1	1.31863	0.695889	0.999802	7	0.857143	1.13025	1	0.996633
CDKL5	CCDS14186.1	631	616	646	0.756554	4	1	1.32178	0.695889	0.999802	7	0.857143	1.13296	1	0.996433
CDKL5	CCDS14186.1	632	617	647	0.756554	4	1	1.32178	0.695889	0.999802	8	0.875	1.15656	0.779776	0.9964
CDKL5	CCDS14186.1	633	618	648	0.763158	4	1	1.31034	0.696178	0.999802	8	0.875	1.14655	0.780498	0.9964
CDKL5	CCDS14186.1	634	619	649	0.755639	4	1	1.32338	0.695889	0.999638	8	0.875	1.15796	0.779776	0.996433
CDKL5	CCDS14186.1	635	620	650	0.74812	5	1	1.33668	0.468434	0.999407	9	0.888889	1.18816	0.571545	0.996133
CDKL5	CCDS14186.1	636	621	651	0.754717	5	1	1.325	0.472269	0.999407	9	0.888889	1.17778	0.788478	0.995867
CDKL5	CCDS14186.1	637	622	652	0.758491	6	0.833333	1.09867	1	0.999407	10	0.8	1.05473	1	0.9958
CDKL5	CCDS14186.1	638	623	653	0.758491	6	0.833333	1.09867	1	0.999407	10	0.8	1.05473	1	0.995467
CDKL5	CCDS14186.1	639	624	654	0.75188	5	0.8	1.064	1	0.999407	9	0.777778	1.03444	1	0.995
CDKL5	CCDS14186.1	640	625	655	0.75188	5	0.8	1.064	1	0.999336	9	0.777778	1.03444	1	0.994967
CDKL5	CCDS14186.1	641	626	656	0.755639	5	0.8	1.05871	1	0.999407	11	0.727273	0.96246	0.823509	0.995033
CDKL5	CCDS14186.1	642	627	657	0.759398	5	0.8	1.05347	1	0.999303	11	0.727273	0.957696	0.820274	0.995233
CDKL5	CCDS14186.1	643	628	658	0.7603	5	0.8	1.05222	1	0.999028	11	0.727273	0.956561	0.819529	0.9953
CDKL5	CCDS14186.1	644	629	659	0.752809	5	0.8	1.06269	1	0.998962	11	0.727273	0.966079	0.825971	0.995267
CDKL5	CCDS14186.1	645	630	660	0.75	5	0.8	1.06667	1	0.998995	10	0.8	1.06667	1	0.994767
CDKL5	CCDS14186.1	646	631	661	0.745318	6	0.833333	1.11809	1	0.998929	10	0.8	1.07337	1	0.994167
CDKL5	CCDS14186.1	647	632	662	0.741573	7	0.714286	0.963203	1	0.998501	11	0.727273	0.980716	1	0.993633
CDKL5	CCDS14186.1	648	633	663	0.740602	7	0.714286	0.964467	1	0.99804	11	0.727273	0.982003	1	0.993267
CDKL5	CCDS14186.1	649	634	664	0.734082	7	0.714286	0.973032	1	0.984098	11	0.727273	0.990724	1	0.994267
CDKL5	CCDS14186.1	650	635	665	0.740602	7	0.714286	0.964467	1	0.986668	11	0.727273	0.982003	1	0.9958
CDKL5	CCDS14186.1	651	636	666	0.735849	7	0.714286	0.970696	1	0.988568	10	0.7	0.951282	0.817886	0.996133
CDKL5	CCDS14186.1	652	637	667	0.735849	6	0.666667	0.905983	0.767363	0.989534	9	0.666667	0.905983	0.796592	0.996233
CDKL5	CCDS14186.1	653	638	668	0.735849	5	0.6	0.815385	0.727663	0.9896	8	0.625	0.849359	0.549029	0.996633
CDKL5	CCDS14186.1	654	639	669	0.735849	5	0.6	0.815385	0.727663	0.990567	8	0.625	0.849359	0.549029	0.996533
CDKL5	CCDS14186.1	655	640	670	0.742424	5	0.6	0.808163	0.724594	0.992164	8	0.625	0.841837	0.538683	0.997133
CDKL5	CCDS14186.1	656	641	671	0.734848	5	0.6	0.816495	0.727773	0.993598	8	0.625	0.850515	0.550405	0.9977
CDKL5	CCDS14186.1	657	642	672	0.727273	5	0.6	0.825	0.732028	0.993559	8	0.625	0.859375	0.56291	0.997933
CDKL5	CCDS14186.1	658	643	673	0.731061	5	0.6	0.820725	0.729661	0.993565	8	0.625	0.854922	0.556482	0.998267
CDKL5	CCDS14186.1	659	644	674	0.724528	6	0.5	0.690104	0.483862	0.993696	9	0.555556	0.766782	0.373709	0.9988
CDKL5	CCDS14186.1	660	645	675	0.732075	6	0.5	0.68299	0.315862	0.993768	9	0.555556	0.758877	0.362662	0.998833
CDKL5	CCDS14186.1	661	646	676	0.736842	6	0.5	0.678571	0.306278	0.993631	9	0.555556	0.753968	0.356677	0.9986
CDKL5	CCDS14186.1	662	647	677	0.738806	6	0.5	0.676768	0.302285	0.994762	10	0.5	0.676768	0.227613	0.998533
CDKL5	CCDS14186.1	663	648	678	0.738806	7	0.571429	0.773449	0.513612	0.99513	9	0.444444	0.601571	0.116689	0.998667
CDKL5	CCDS14186.1	664	649	679	0.738806	7	0.571429	0.773449	0.513612	0.994663	9	0.444444	0.601571	0.116689	0.998933
CDKL5	CCDS14186.1	665	650	680	0.745318	9	0.555556	0.745394	0.365655	0.994959	11	0.454545	0.609868	0.0845772	0.999
CDKL5	CCDS14186.1	666	651	681	0.746269	8	0.5	0.67	0.220903	0.99463	10	0.4	0.536	0.0573741	0.998467
CDKL5	CCDS14186.1	667	652	682	0.746269	8	0.5	0.67	0.220903	0.994498	10	0.4	0.536	0.0573741	0.9986
CDKL5	CCDS14186.1	668	653	683	0.739777	7	0.571429	0.772434	0.512977	0.994432	9	0.444444	0.600782	0.115532	0.998667
CDKL5	CCDS14186.1	669	654	684	0.738806	7	0.571429	0.773449	0.513612	0.994531	9	0.444444	0.601571	0.116689	0.9986
CDKL5	CCDS14186.1	670	655	685	0.738806	7	0.571429	0.773449	0.513612	0.994366	10	0.5	0.676768	0.227613	0.9984
CDKL5	CCDS14186.1	671	656	686	0.744361	7	0.571429	0.767677	0.509257	0.994696	10	0.5	0.671717	0.223519	0.998367
CDKL5	CCDS14186.1	672	657	687	0.745318	7	0.571429	0.766691	0.508311	0.994399	8	0.5	0.670854	0.20239	0.9983
CDKL5	CCDS14186.1	673	658	688	0.741573	7	0.571429	0.770563	0.511501	0.993768	8	0.5	0.674242	0.316089	0.9982
CDKL5	CCDS14186.1	674	659	689	0.741573	7	0.571429	0.770563	0.511501	0.993636	10	0.5	0.674242	0.225411	0.9984
CDKL5	CCDS14186.1	675	660	690	0.749064	7	0.571429	0.762857	0.505384	0.992505	10	0.5	0.6675	0.220737	0.998033
CDKL5	CCDS14186.1	676	661	691	0.749064	7	0.571429	0.762857	0.505384	0.992401	10	0.5	0.6675	0.220737	0.9977
CDKL5	CCDS14186.1	677	662	692	0.753731	6	0.5	0.663366	0.272891	0.992401	9	0.444444	0.589659	0.0986279	0.9972
CDKL5	CCDS14186.1	678	663	693	0.761194	5	0.6	0.788235	0.472269	0.991797	8	0.5	0.656863	0.174081	0.997067
CDKL5	CCDS14186.1	679	664	694	0.762082	5	0.6	0.787317	0.470237	0.991269	8	0.5	0.656098	0.172769	0.997
CDKL5	CCDS14186.1	680	665	695	0.762082	5	0.6	0.787317	0.470237	0.990468	8	0.5	0.656098	0.172769	0.996867
CDKL5	CCDS14186.1	681	666	696	0.755556	6	0.666667	0.882353	0.749808	0.989331	9	0.555556	0.735294	0.336815	0.996633
CDKL5	CCDS14186.1	682	667	697	0.749077	6	0.666667	0.889984	0.754997	0.9877	10	0.6	0.800985	0.384209	0.996
CDKL5	CCDS14186.1	683	668	698	0.755556	6	0.666667	0.882353	0.749808	0.999094	10	0.6	0.794118	0.374248	0.9988
CDKL5	CCDS14186.1	684	669	699	0.762082	6	0.666667	0.874797	0.74483	0.999127	10	0.6	0.787317	0.364222	0.9989
CDKL5	CCDS14186.1	685	670	700	0.766667	6	0.666667	0.869565	0.741128	0.999193	10	0.6	0.782609	0.357816	0.999167
CDKL5	CCDS14186.1	686	671	701	0.762963	6	0.666667	0.873786	0.74402	0.999193	11	0.545455	0.714916	0.23368	0.9992
CDKL5	CCDS14186.1	687	672	702	0.77037	6	0.666667	0.865385	0.7384	0.99916	11	0.545455	0.708042	0.228668	0.999167
CDKL5	CCDS14186.1	688	673	703	0.766667	9	0.555556	0.724638	0.348913	0.999336	14	0.5	0.652174	0.0667667	0.9991
CDKL5	CCDS14186.1	689	674	704	0.772388	9	0.555556	0.71927	0.230856	0.999407	15	0.533333	0.690499	0.113994	0.9991
CDKL5	CCDS14186.1	690	675	705	0.779851	8	0.625	0.801435	0.51274	0.999407	14	0.571429	0.732741	0.172025	0.9992
CDKL5	CCDS14186.1	691	676	706	0.779851	8	0.625	0.801435	0.51274	0.999473	14	0.571429	0.732741	0.172025	0.9992
CDKL5	CCDS14186.1	692	677	707	0.772388	8	0.625	0.809179	0.519335	0.999506	15	0.533333	0.690499	0.113994	0.998967
CDKL5	CCDS14186.1	693	678	708	0.772388	8	0.625	0.809179	0.519335	0.999506	14	0.571429	0.739821	0.179881	0.9991
CDKL5	CCDS14186.1	694	679	709	0.772388	7	0.571429	0.739821	0.315582	0.99944	14	0.571429	0.739821	0.179881	0.9991
CDKL5	CCDS14186.1	695	680	710	0.769517	7	0.571429	0.742581	0.322375	0.999407	14	0.571429	0.742581	0.18351	0.9992
CDKL5	CCDS14186.1	696	681	711	0.765799	5	0.6	0.783495	0.462307	0.999407	12	0.583333	0.761731	0.256887	0.999067
CDKL5	CCDS14186.1	697	682	712	0.765799	5	0.6	0.783495	0.462307	0.999638	12	0.583333	0.761731	0.256887	0.9989
CDKL5	CCDS14186.1	698	683	713	0.759259	6	0.5	0.658537	0.262839	0.999703	13	0.538462	0.709193	0.170804	0.999133
CDKL5	CCDS14186.1	699	684	714	0.766667	6	0.5	0.652174	0.250922	0.999802	13	0.538462	0.702341	0.16457	0.9992
CDKL5	CCDS14186.1	700	685	715	0.774908	6	0.5	0.645238	0.237961	0.999802	13	0.538462	0.694872	0.159059	0.999133
CDKL5	CCDS14186.1	701	686	716	0.780669	6	0.5	0.640476	0.22741	0.999802	12	0.5	0.640476	0.0723172	0.999333
CDKL5	CCDS14186.1	702	687	717	0.777778	6	0.5	0.642857	0.233053	0.999802	12	0.5	0.642857	0.0755207	0.999567
CDKL5	CCDS14186.1	703	688	718	0.77037	6	0.5	0.649038	0.245118	0.999802	12	0.5	0.649038	0.0840601	0.999567
CDKL5	CCDS14186.1	704	689	719	0.762963	8	0.375	0.491505	0.071812	0.999769	14	0.428571	0.56172	0.0281018	0.9995
CDKL5	CCDS14186.1	705	690	720	0.762963	8	0.375	0.491505	0.071812	0.999703	12	0.416667	0.546117	0.0359909	0.9995
CDKL5	CCDS14186.1	706	691	721	0.755556	8	0.375	0.496324	0.0775357	0.999572	12	0.416667	0.551471	0.0401687	0.9995
CDKL5	CCDS14186.1	707	692	722	0.755556	9	0.444444	0.588235	0.113508	0.999572	13	0.461538	0.61086	0.0578369	0.9995
CDKL5	CCDS14186.1	708	693	723	0.748148	9	0.444444	0.594059	0.122573	0.999638	13	0.461538	0.616908	0.0643026	0.9995
CDKL5	CCDS14186.1	709	694	724	0.748148	8	0.375	0.501238	0.0841782	0.999506	12	0.416667	0.556931	0.0447622	0.999467
CDKL5	CCDS14186.1	710	695	725	0.755556	8	0.375	0.496324	0.0775357	0.999506	12	0.416667	0.551471	0.0401687	0.999433
CDKL5	CCDS14186.1	711	696	726	0.755556	8	0.375	0.496324	0.0775357	0.999303	12	0.416667	0.551471	0.0401687	0.9995
CDKL5	CCDS14186.1	712	697	727	0.762963	7	0.285714	0.37448	0.0459648	0.999193	11	0.363636	0.476611	0.0229229	0.9995
CDKL5	CCDS14186.1	713	698	728	0.77037	7	0.285714	0.370879	0.0419196	0.999193	11	0.363636	0.472028	0.0201882	0.9995
CDKL5	CCDS14186.1	714	699	729	0.77037	7	0.285714	0.370879	0.0419196	0.998962	11	0.363636	0.472028	0.0201882	0.999433
CDKL5	CCDS14186.1	715	700	730	0.771218	7	0.285714	0.370472	0.0416127	0.998765	11	0.363636	0.471509	0.0199959	0.9994
CDKL5	CCDS14186.1	716	701	731	0.771218	7	0.285714	0.370472	0.0416127	0.998534	11	0.363636	0.471509	0.0199959	0.9994
CDKL5	CCDS14186.1	717	702	732	0.768382	7	0.285714	0.371839	0.0431138	0.998402	11	0.454545	0.591562	0.0617873	0.999233
CDKL5	CCDS14186.1	718	703	733	0.759259	7	0.285714	0.376307	0.0478166	0.999303	11	0.454545	0.59867	0.0700217	0.994267
CDKL5	CCDS14186.1	719	704	734	0.762963	5	0.4	0.524272	0.18161	0.999934	9	0.555556	0.728155	0.331033	0.9927
CDKL5	CCDS14186.1	720	705	735	0.760148	5	0.4	0.526214	0.185645	1	9	0.555556	0.730852	0.332961	0.994533
CDKL5	CCDS14186.1	721	706	736	0.752768	5	0.4	0.531373	0.196188	1	9	0.555556	0.738017	0.339715	0.995633
CDKL5	CCDS14186.1	722	707	737	0.745387	5	0.4	0.536634	0.206672	0.999934	10	0.6	0.80495	0.390595	0.9981
CDKL5	CCDS14186.1	723	708	738	0.745387	5	0.4	0.536634	0.206672	0.999868	9	0.666667	0.894389	0.791921	0.998333
CDKL5	CCDS14186.1	724	709	739	0.741697	7	0.428571	0.577825	0.164253	1	11	0.636364	0.857983	0.595525	0.998467
CDKL5	CCDS14186.1	725	710	740	0.741697	10	0.5	0.674129	0.245118	1	14	0.642857	0.866738	0.479897	0.998733
CDKL5	CCDS14186.1	726	711	741	0.736059	10	0.5	0.679293	0.249278	1	14	0.642857	0.873377	0.646239	0.998733
CDKL5	CCDS14186.1	727	712	742	0.739777	10	0.5	0.675879	0.246672	1	14	0.642857	0.868988	0.483039	0.9988
CDKL5	CCDS14186.1	728	713	743	0.747212	10	0.5	0.669154	0.241907	1	14	0.642857	0.860341	0.470766	0.998967
CDKL5	CCDS14186.1	729	714	744	0.754647	9	0.555556	0.73618	0.357383	1	13	0.692308	0.917393	0.637935	0.999167
CDKL5	CCDS14186.1	730	715	745	0.747212	9	0.555556	0.743505	0.364244	1	13	0.692308	0.926521	0.83527	0.9992
CDKL5	CCDS14186.1	731	716	746	0.738806	9	0.555556	0.751964	0.37289	1	14	0.714286	0.966811	0.849635	0.999167
CDKL5	CCDS14186.1	732	717	747	0.733333	10	0.5	0.681818	0.250966	1	15	0.666667	0.909091	0.664894	0.999267
CDKL5	CCDS14186.1	733	718	748	0.738007	11	0.545455	0.739091	0.280924	1	17	0.647059	0.876765	0.516738	0.9993
CDKL5	CCDS14186.1	734	719	749	0.745387	11	0.545455	0.731773	0.270702	1	17	0.647059	0.868084	0.507926	0.9994
CDKL5	CCDS14186.1	735	720	750	0.743494	9	0.666667	0.896667	0.805568	0.999802	15	0.733333	0.986333	1	0.999333
CDKL5	CCDS14186.1	736	721	751	0.75	9	0.666667	0.888889	0.803344	1	15	0.733333	0.977778	1	0.9992
CDKL5	CCDS14186.1	737	722	752	0.752809	10	0.6	0.797015	0.398134	1	16	0.6875	0.913246	0.66514	0.999333
CDKL5	CCDS14186.1	738	723	753	0.759398	9	0.555556	0.731573	0.35442	1	15	0.666667	0.877888	0.482595	0.999433
CDKL5	CCDS14186.1	739	724	754	0.759398	9	0.555556	0.731573	0.35442	1	15	0.666667	0.877888	0.482595	0.9995
CDKL5	CCDS14186.1	740	725	755	0.75188	10	0.5	0.665	0.160548	1	16	0.625	0.83125	0.351873	0.9995
CDKL5	CCDS14186.1	741	726	756	0.75188	10	0.5	0.665	0.160548	1	16	0.625	0.83125	0.351873	0.9994
CDKL5	CCDS14186.1	742	727	757	0.759398	12	0.5	0.658416	0.115431	1	18	0.611111	0.80473	0.254938	0.9994
CDKL5	CCDS14186.1	743	728	758	0.75188	12	0.5	0.665	0.173824	1	19	0.631579	0.84	0.386804	0.9994
CDKL5	CCDS14186.1	744	729	759	0.753788	12	0.5	0.663317	0.17259	1	18	0.611111	0.81072	0.262652	0.999267
CDKL5	CCDS14186.1	745	730	760	0.753788	12	0.5	0.663317	0.17259	1	18	0.611111	0.81072	0.262652	0.9992
CDKL5	CCDS14186.1	746	731	761	0.753788	12	0.5	0.663317	0.17259	1	18	0.611111	0.81072	0.262652	0.9991
CDKL5	CCDS14186.1	747	732	762	0.746212	12	0.5	0.670051	0.178028	1	18	0.611111	0.818951	0.27649	0.9991
CDKL5	CCDS14186.1	748	733	763	0.752852	12	0.5	0.664141	0.173155	1	17	0.588235	0.781343	0.243731	0.9991
CDKL5	CCDS14186.1	749	734	764	0.762264	12	0.5	0.655941	0.111247	1	17	0.588235	0.771695	0.236295	0.998967
CDKL5	CCDS14186.1	750	735	765	0.766038	11	0.454545	0.593372	0.0781785	1	16	0.5625	0.734298	0.137301	0.9989
CDKL5	CCDS14186.1	751	736	766	0.770677	11	0.454545	0.5898	0.0735328	1	15	0.533333	0.692033	0.115004	0.998867
CDKL5	CCDS14186.1	752	737	767	0.778195	11	0.454545	0.584102	0.0674688	1	15	0.533333	0.685346	0.074156	0.999
CDKL5	CCDS14186.1	753	738	768	0.776515	11	0.454545	0.585366	0.0686514	1	14	0.5	0.643902	0.0574494	0.9991
CDKL5	CCDS14186.1	754	739	769	0.78327	11	0.454545	0.580318	0.0630893	1	14	0.5	0.63835	0.0513221	0.999133
CDKL5	CCDS14186.1	755	740	770	0.793893	9	0.444444	0.559829	0.0725102	1	12	0.5	0.629808	0.059282	0.999333
CDKL5	CCDS14186.1	756	741	771	0.793893	6	0.333333	0.419872	0.066508	1	9	0.444444	0.559829	0.0589806	0.999233
CDKL5	CCDS14186.1	757	742	772	0.802281	6	0.333333	0.415482	0.0607674	1	9	0.444444	0.553976	0.0525622	0.9991
CDKL5	CCDS14186.1	758	743	773	0.802281	6	0.333333	0.415482	0.0607674	1	9	0.444444	0.553976	0.0525622	0.998667
CDKL5	CCDS14186.1	759	744	774	0.801527	6	0.333333	0.415873	0.0611487	0.950669	9	0.444444	0.554497	0.0532136	0.975533
CDKL5	CCDS14186.1	760	745	775	0.800766	6	0.333333	0.416268	0.0617446	0.860903	9	0.444444	0.555024	0.0537965	0.935267
CDKL5	CCDS14186.1	761	746	776	0.807692	6	0.333333	0.412698	0.0570252	0.868497	9	0.444444	0.550265	0.0484412	0.940567
CDKL5	CCDS14186.1	762	747	777	0.815385	6	0.333333	0.408805	0.0523136	0.875828	8	0.375	0.459906	0.0279862	0.944333
CDKL5	CCDS14186.1	763	748	778	0.814672	5	0.4	0.490995	0.117832	0.883499	7	0.428571	0.526066	0.0648894	0.947267
CDKL5	CCDS14186.1	764	749	779	0.814672	4	0.25	0.306872	0.0720052	0.891439	5	0.4	0.490995	0.100472	0.950633
CDKL5	CCDS14186.1	765	750	780	0.814672	4	0.25	0.306872	0.0720052	0.896968	5	0.4	0.490995	0.100472	0.954267
CDKL5	CCDS14186.1	766	751	781	0.819923	4	0.25	0.304907	0.0687141	0.903502	5	0.4	0.48785	0.0945652	0.956167
CDKL5	CCDS14186.1	767	752	782	0.811538	4	0.25	0.308057	0.0739236	0.908768	5	0.4	0.492891	0.103802	0.962133
CDKL5	CCDS14186.1	768	753	783	0.819923	4	0.5	0.609813	0.258113	0.914731	4	0.5	0.609813	0.239614	0.965767
CDKL5	CCDS14186.1	769	754	784	0.819923	4	0.5	0.609813	0.258113	0.9174	4	0.5	0.609813	0.239614	0.9692
CDKL5	CCDS14186.1	770	755	785	0.826923	4	0.5	0.604651	0.247941	0.920799	4	0.5	0.604651	0.228353	0.9715
CDKL5	CCDS14186.1	771	756	786	0.833977	3	0.666667	0.799383	0.543515	0.925169	3	0.666667	0.799383	0.52567	0.9748
CDKL5	CCDS14186.1	772	757	787	0.833333	3	0.666667	0.8	0.544723	0.927069	3	0.666667	0.8	0.526993	0.975267
CDKL5	CCDS14186.1	773	758	788	0.832685	1	1	1.20093	1	0.928535	1	1	1.20093	1	0.975733
CDKL5	CCDS14186.1	774	759	789	0.839844	1	1	1.1907	1	0.930962	0	NA	NA	NA	0.976133
CDKL5	CCDS14186.1	775	760	790	0.829457	1	1	1.20561	1	0.931369	0	NA	NA	NA	0.976567
CDKL5	CCDS14186.1	776	761	791	0.829457	2	1	1.20561	1	0.930732	1	1	1.20561	1	0.977533
CDKL5	CCDS14186.1	777	762	792	0.821705	2	1	1.21698	1	0.930199	1	1	1.21698	1	0.976267
CDKL5	CCDS14186.1	778	763	793	0.821705	3	1	1.21698	1	0.928135	2	1	1.21698	1	0.9753
CDKL5	CCDS14186.1	779	764	794	0.814672	3	1	1.22749	1	0.923731	2	1	1.22749	1	0.975367
CDKL5	CCDS14186.1	780	765	795	0.814672	3	1	1.22749	1	0.918734	2	1	1.22749	1	0.974267
CDKL5	CCDS14186.1	781	766	796	0.810811	3	1	1.23333	1	0.915802	3	0.666667	0.822222	0.573516	0.970067
CDKL5	CCDS14186.1	782	767	797	0.810811	5	1	1.23333	0.707474	0.910728	4	0.75	0.925	0.668599	0.9664
CDKL5	CCDS14186.1	783	768	798	0.810811	6	0.833333	1.02778	1	0.903595	5	0.6	0.74	0.341942	0.9629
CDKL5	CCDS14186.1	784	769	799	0.812261	7	0.857143	1.05526	1	0.894003	6	0.666667	0.820755	0.419106	0.958433
CDKL5	CCDS14186.1	785	770	800	0.812977	7	0.857143	1.05433	1	0.884937	6	0.666667	0.820031	0.417139	0.951233
CDKL5	CCDS14186.1	786	771	801	0.806084	7	0.857143	1.06334	1	0.877662	6	0.666667	0.827044	0.436006	0.951767
CDKL5	CCDS14186.1	787	772	802	0.802281	7	0.857143	1.06838	1	0.871534	6	0.666667	0.830964	0.445499	0.948767
CDKL5	CCDS14186.1	788	773	803	0.795455	8	0.75	0.942857	0.778016	0.862968	8	0.625	0.785714	0.311175	0.9424
CDKL5	CCDS14186.1	789	774	804	0.791667	8	0.75	0.947368	0.782124	0.851036	8	0.625	0.789474	0.482934	0.939233
CDKL5	CCDS14186.1	790	775	805	0.791667	8	0.75	0.947368	0.782124	0.837133	9	0.555556	0.701754	0.171935	0.933633
CDKL5	CCDS14186.1	791	776	806	0.791667	8	0.75	0.947368	0.782124	0.824998	9	0.555556	0.701754	0.171935	0.9261
CDKL5	CCDS14186.1	792	777	807	0.784906	8	0.75	0.955529	0.790429	0.808602	9	0.555556	0.707799	0.184655	0.9164
CDKL5	CCDS14186.1	793	778	808	0.781955	8	0.75	0.959135	0.794296	1	10	0.6	0.767308	0.341371	0.996533
CDKL5	CCDS14186.1	794	779	809	0.790262	8	0.75	0.949052	0.783531	1	10	0.6	0.759242	0.334641	0.996733
CDKL5	CCDS14186.1	795	780	810	0.782772	8	0.75	0.958134	0.7933	1	10	0.6	0.766507	0.340775	0.997067
CDKL5	CCDS14186.1	796	781	811	0.775281	8	0.75	0.967391	1	1	10	0.6	0.773913	0.348139	0.996767
CDKL5	CCDS14186.1	797	782	812	0.779026	8	0.75	0.96274	0.797675	0.999802	10	0.6	0.770192	0.344148	0.996533
CDKL5	CCDS14186.1	798	783	813	0.780669	8	0.75	0.960714	0.795504	0.999802	10	0.6	0.768571	0.342459	0.9967
CDKL5	CCDS14186.1	799	784	814	0.769517	7	0.714286	0.928226	0.773455	0.999802	10	0.6	0.77971	0.354554	0.996633
CDKL5	CCDS14186.1	800	785	815	0.77037	8	0.625	0.811298	0.521159	0.999802	11	0.545455	0.708042	0.228668	0.9967
CDKL5	CCDS14186.1	801	786	816	0.771218	8	0.625	0.810407	0.520252	0.999802	11	0.545455	0.707264	0.228254	0.996833
CDKL5	CCDS14186.1	802	787	817	0.767528	8	0.625	0.814303	0.523829	0.999802	11	0.545455	0.710664	0.230685	0.996767
CDKL5	CCDS14186.1	803	788	818	0.761029	8	0.625	0.821256	0.530199	0.999802	11	0.545455	0.716733	0.235418	0.9967
CDKL5	CCDS14186.1	804	789	819	0.761029	8	0.625	0.821256	0.530199	0.999802	11	0.545455	0.716733	0.235418	0.996667
CDKL5	CCDS14186.1	805	790	820	0.761029	8	0.625	0.821256	0.530199	0.999802	11	0.545455	0.716733	0.235418	0.9966
CDKL5	CCDS14186.1	806	791	821	0.77037	8	0.625	0.811298	0.521159	0.999802	11	0.545455	0.708042	0.228668	0.996333
CDKL5	CCDS14186.1	807	792	822	0.763838	10	0.6	0.785507	0.380515	0.999802	12	0.5	0.654589	0.0923319	0.996067
CDKL5	CCDS14186.1	808	793	823	0.763838	11	0.545455	0.714097	0.252432	0.999802	13	0.461538	0.604236	0.0509223	0.996
CDKL5	CCDS14186.1	809	794	824	0.77037	11	0.545455	0.708042	0.248449	0.999802	12	0.416667	0.540865	0.0316287	0.995733
CDKL5	CCDS14186.1	810	795	825	0.776952	11	0.545455	0.702044	0.160548	0.999802	13	0.461538	0.594038	0.0411585	0.9958
CDKL5	CCDS14186.1	811	796	826	0.773234	11	0.545455	0.70542	0.246863	0.999802	13	0.461538	0.596893	0.0436902	0.9958
CDKL5	CCDS14186.1	812	797	827	0.771536	11	0.545455	0.706973	0.247882	0.999802	12	0.5	0.648058	0.0827527	0.9959
CDKL5	CCDS14186.1	813	798	828	0.771536	10	0.5	0.648058	0.130542	0.999802	12	0.5	0.648058	0.0827527	0.996167
CDKL5	CCDS14186.1	814	799	829	0.7603	11	0.636364	0.836991	0.433615	0.999802	14	0.571429	0.751583	0.196421	0.9961
CDKL5	CCDS14186.1	815	800	830	0.766917	10	0.6	0.782353	0.375963	0.999802	13	0.538462	0.702112	0.164423	0.9962
CDKL5	CCDS14186.1	816	801	831	0.759398	10	0.6	0.790099	0.386939	0.999802	13	0.538462	0.709063	0.170713	0.996
CDKL5	CCDS14186.1	817	802	832	0.766038	10	0.6	0.783251	0.377328	0.999736	13	0.538462	0.702918	0.164938	0.995533
CDKL5	CCDS14186.1	818	803	833	0.777358	10	0.6	0.771845	0.364815	0.999736	13	0.538462	0.692681	0.102793	0.995367
CDKL5	CCDS14186.1	819	804	834	0.784091	9	0.666667	0.850242	0.540107	0.999703	12	0.583333	0.743961	0.238184	0.9953
CDKL5	CCDS14186.1	820	805	835	0.781132	9	0.666667	0.853462	0.544493	0.999802	12	0.583333	0.746779	0.240577	0.995233
CDKL5	CCDS14186.1	821	806	836	0.776515	9	0.666667	0.858537	0.551416	0.999802	11	0.636364	0.819512	0.380648	0.995
CDKL5	CCDS14186.1	822	807	837	0.776515	9	0.666667	0.858537	0.551416	0.999703	11	0.636364	0.819512	0.380648	0.994633
CDKL5	CCDS14186.1	823	808	838	0.774809	9	0.666667	0.860427	0.554307	0.999703	11	0.636364	0.821317	0.383673	0.9947
CDKL5	CCDS14186.1	824	809	839	0.767176	9	0.666667	0.868988	0.566655	0.999572	10	0.6	0.78209	0.357436	0.9945
CDKL5	CCDS14186.1	825	810	840	0.759542	9	0.666667	0.877722	0.580348	0.999506	11	0.545455	0.718136	0.236727	0.994367
CDKL5	CCDS14186.1	826	811	841	0.766284	9	0.666667	0.87	0.568448	0.999506	11	0.545455	0.711818	0.231442	0.9944
CDKL5	CCDS14186.1	827	812	842	0.769231	9	0.666667	0.866667	0.563116	0.999638	11	0.545455	0.709091	0.22948	0.9943
CDKL5	CCDS14186.1	828	813	843	0.763566	9	0.666667	0.873096	0.573121	0.999703	12	0.5	0.654822	0.0925912	0.994433
CDKL5	CCDS14186.1	829	814	844	0.771318	9	0.666667	0.864322	0.559224	0.999703	12	0.5	0.648241	0.0829878	0.9944
CDKL5	CCDS14186.1	830	815	845	0.771318	9	0.666667	0.864322	0.559224	0.999473	12	0.5	0.648241	0.0829878	0.994333
CDKL5	CCDS14186.1	831	816	846	0.763566	8	0.75	0.982234	1	0.999473	11	0.545455	0.714352	0.233343	0.994367
CDKL5	CCDS14186.1	832	817	847	0.754864	10	0.7	0.92732	0.81386	0.999638	12	0.5	0.662371	0.154203	0.994233
CDKL5	CCDS14186.1	833	818	848	0.751938	10	0.7	0.930928	0.815003	0.999769	12	0.5	0.664948	0.155774	0.997333
CDKL5	CCDS14186.1	834	819	849	0.75	11	0.636364	0.848485	0.606835	0.999802	14	0.5	0.666667	0.113724	0.998067
CDKL5	CCDS14186.1	835	820	850	0.750973	11	0.636364	0.847386	0.606071	0.999802	14	0.5	0.665803	0.11316	0.998333
CDKL5	CCDS14186.1	836	821	851	0.751938	13	0.692308	0.920698	0.659937	0.999868	16	0.5625	0.748067	0.15875	0.9986
CDKL5	CCDS14186.1	837	822	852	0.742308	14	0.642857	0.866025	0.499389	1	18	0.555556	0.748417	0.176559	0.998833
CDKL5	CCDS14186.1	838	823	853	0.742308	11	0.636364	0.857277	0.612364	1	16	0.5625	0.757772	0.235273	0.998867
CDKL5	CCDS14186.1	839	824	854	0.742308	10	0.7	0.943005	0.819655	1	15	0.6	0.80829	0.338057	0.9988
CDKL5	CCDS14186.1	840	825	855	0.733591	9	0.666667	0.908772	0.809426	1	15	0.6	0.817895	0.350238	0.998767
CDKL5	CCDS14186.1	841	826	856	0.734615	10	0.7	0.95288	0.823893	1	15	0.6	0.816754	0.34856	0.9988
CDKL5	CCDS14186.1	842	827	857	0.730769	10	0.7	0.957895	0.825543	1	16	0.625	0.855263	0.503236	0.9988
CDKL5	CCDS14186.1	843	828	858	0.732824	11	0.727273	0.992424	1	1	18	0.666667	0.909722	0.691813	0.9989
CDKL5	CCDS14186.1	844	829	859	0.732824	10	0.7	0.955208	0.824887	1	17	0.647059	0.882966	0.523528	0.999267
CDKL5	CCDS14186.1	845	830	860	0.743295	8	0.625	0.840851	0.554941	1	14	0.642857	0.864875	0.477314	0.999467
CDKL5	CCDS14186.1	846	831	861	0.736641	8	0.625	0.848446	0.565042	1	15	0.666667	0.905009	0.661946	0.999467
CDKL5	CCDS14186.1	847	832	862	0.738462	8	0.625	0.846354	0.561923	1	15	0.666667	0.902778	0.660412	0.9995
CDKL5	CCDS14186.1	848	833	863	0.731801	9	0.666667	0.910995	0.810383	1	16	0.6875	0.939463	0.855869	0.9995
CDKL5	CCDS14186.1	849	834	864	0.724138	9	0.666667	0.920635	0.813344	1	16	0.6875	0.949405	0.857974	0.9995
CDKL5	CCDS14186.1	850	835	865	0.724138	9	0.666667	0.920635	0.813344	1	15	0.666667	0.920635	0.674624	0.9994
CDKL5	CCDS14186.1	851	836	866	0.730769	9	0.666667	0.912281	0.810792	1	15	0.666667	0.912281	0.667413	0.999467
CDKL5	CCDS14186.1	852	837	867	0.729008	9	0.666667	0.914485	0.811103	1	15	0.666667	0.914485	0.669142	0.9995
CDKL5	CCDS14186.1	853	838	868	0.729008	9	0.666667	0.914485	0.811103	1	15	0.666667	0.914485	0.669142	0.9995
CDKL5	CCDS14186.1	854	839	869	0.738636	9	0.666667	0.902564	0.806937	1	15	0.666667	0.902564	0.660278	0.999567
CDKL5	CCDS14186.1	855	840	870	0.742424	9	0.666667	0.897959	0.805934	1	15	0.666667	0.897959	0.657052	0.9997
CDKL5	CCDS14186.1	856	841	871	0.75	9	0.666667	0.888889	0.803344	1	14	0.714286	0.952381	0.843496	0.9997
CDKL5	CCDS14186.1	857	842	872	0.741445	9	0.666667	0.899145	0.806254	1	14	0.714286	0.96337	0.848287	0.9997
CDKL5	CCDS14186.1	858	843	873	0.745247	9	0.666667	0.894558	0.805019	1	14	0.714286	0.958455	0.846213	0.9997
CDKL5	CCDS14186.1	859	844	874	0.74717	9	0.666667	0.892256	0.804262	1	13	0.769231	1.02953	1	0.9997
CDKL5	CCDS14186.1	860	845	875	0.735849	9	0.666667	0.905983	0.808354	1	13	0.769231	1.04536	1	0.9997
CDKL5	CCDS14186.1	861	846	876	0.739623	9	0.666667	0.901361	0.806777	1	13	0.769231	1.04003	1	0.9997
CDKL5	CCDS14186.1	862	847	877	0.74717	9	0.666667	0.892256	0.804262	1	13	0.769231	1.02953	1	0.9997
CDKL5	CCDS14186.1	863	848	878	0.74812	7	0.714286	0.954774	1	1	13	0.769231	1.02822	1	0.9998
CDKL5	CCDS14186.1	864	849	879	0.744361	7	0.714286	0.959596	1	1	13	0.769231	1.03341	1	0.9998
CDKL5	CCDS14186.1	865	850	880	0.753731	6	0.833333	1.10561	1	1	11	0.818182	1.08551	1	0.9998
CDKL5	CCDS14186.1	866	851	881	0.752809	6	0.833333	1.10697	1	1	11	0.818182	1.08684	1	0.9998
CDKL5	CCDS14186.1	867	852	882	0.745318	4	0.75	1.00628	1	1	9	0.777778	1.04355	1	0.999733
CDKL5	CCDS14186.1	868	853	883	0.745318	3	1	1.34171	0.693892	1	7	0.857143	1.15004	0.777972	0.9997
CDKL5	CCDS14186.1	869	854	884	0.745318	4	0.75	1.00628	1	1	8	0.75	1.00628	1	0.9998
CDKL5	CCDS14186.1	870	855	885	0.745318	5	0.8	1.07337	1	1	9	0.777778	1.04355	1	0.9998
CDKL5	CCDS14186.1	871	856	886	0.754647	5	0.8	1.0601	1	1	9	0.777778	1.03065	1	0.999767
CDKL5	CCDS14186.1	872	857	887	0.754647	4	0.75	0.993842	1	1	8	0.75	0.993842	1	0.9997
CDKL5	CCDS14186.1	873	858	888	0.762082	4	0.75	0.984146	1	1	7	0.714286	0.937282	0.764255	0.9997
CDKL5	CCDS14186.1	874	859	889	0.765799	3	0.666667	0.87055	0.671922	1	5	0.6	0.783495	0.440125	0.9997
CDKL5	CCDS14186.1	875	860	890	0.754647	3	0.666667	0.883415	0.689117	0.999934	7	0.714286	0.946517	0.773705	0.9997
CDKL5	CCDS14186.1	876	861	891	0.754647	4	0.5	0.662562	0.374042	0.999802	8	0.625	0.828202	0.521055	0.9997
CDKL5	CCDS14186.1	877	862	892	0.761194	4	0.5	0.656863	0.363766	0.999769	7	0.571429	0.7507	0.475807	0.999567
CDKL5	CCDS14186.1	878	863	893	0.759259	5	0.6	0.790244	0.716787	0.999703	9	0.555556	0.731707	0.333765	0.9995
CDKL5	CCDS14186.1	879	864	894	0.759259	5	0.6	0.790244	0.716787	0.999506	9	0.555556	0.731707	0.333765	0.9994
CDKL5	CCDS14186.1	880	865	895	0.759259	6	0.666667	0.878049	0.746932	0.999703	10	0.6	0.790244	0.368366	0.999167
CDKL5	CCDS14186.1	881	866	896	0.759259	6	0.666667	0.878049	0.746932	0.999264	10	0.6	0.790244	0.368366	0.998833
CDKL5	CCDS14186.1	882	867	897	0.752768	6	0.666667	0.885621	0.751754	0.998962	10	0.6	0.797059	0.378135	0.998733
CDKL5	CCDS14186.1	883	868	898	0.756458	6	0.666667	0.881301	0.749081	0.999061	10	0.6	0.793171	0.37269	0.998533
CDKL5	CCDS14186.1	884	869	899	0.75	6	0.666667	0.888889	0.754207	0.998468	10	0.6	0.8	0.382549	0.998533
CDKL5	CCDS14186.1	885	870	900	0.742647	6	0.666667	0.89769	0.761174	0.998402	10	0.6	0.807921	0.395674	0.998167
CDKL5	CCDS14186.1	886	871	901	0.742647	6	0.666667	0.89769	0.761174	0.998369	10	0.6	0.807921	0.395674	0.998
CDKL5	CCDS14186.1	887	872	902	0.741697	6	0.666667	0.898839	0.761827	0.998172	10	0.6	0.808955	0.39725	0.9981
CDKL5	CCDS14186.1	888	873	903	0.739927	6	0.666667	0.90099	0.763596	0.99776	11	0.545455	0.737174	0.2574	0.998233
CDKL5	CCDS14186.1	889	874	904	0.733577	6	0.666667	0.908789	0.769241	0.997661	11	0.545455	0.743555	0.266231	0.998033
CDKL5	CCDS14186.1	890	875	905	0.737226	7	0.571429	0.775106	0.515478	0.997101	12	0.5	0.678218	0.167029	0.998
CDKL5	CCDS14186.1	891	876	906	0.740876	9	0.666667	0.899836	0.806529	0.996837	14	0.571429	0.771288	0.315727	0.997867
CDKL5	CCDS14186.1	892	877	907	0.736264	10	0.7	0.950746	0.823172	0.996705	16	0.625	0.848881	0.499164	0.997833
CDKL5	CCDS14186.1	893	878	908	0.735294	10	0.7	0.952	0.823494	0.996332	17	0.647059	0.88	0.520197	0.9977
CDKL5	CCDS14186.1	894	879	909	0.742647	10	0.7	0.942574	0.819498	0.995267	16	0.6875	0.925743	0.676005	0.997067
CDKL5	CCDS14186.1	895	880	910	0.746324	10	0.7	0.937931	0.81746	0.993938	16	0.6875	0.921182	0.671401	0.996933
CDKL5	CCDS14186.1	896	881	911	0.741697	10	0.7	0.943781	0.820082	0.992604	16	0.6875	0.926928	0.677176	0.9964
CDKL5	CCDS14186.1	897	882	912	0.738007	10	0.7	0.9485	0.822312	0.992296	16	0.6875	0.931562	0.681541	0.996533
CDKL5	CCDS14186.1	898	883	913	0.744444	12	0.75	1.00746	1	0.991764	18	0.722222	0.970149	0.862963	0.996367
CDKL5	CCDS14186.1	899	884	914	0.747212	12	0.75	1.00373	1	0.991269	18	0.722222	0.966556	0.862018	0.9952
CDKL5	CCDS14186.1	900	885	915	0.754647	12	0.833333	1.10427	0.83079	0.990363	18	0.777778	1.03065	1	0.994833
CDKL5	CCDS14186.1	901	886	916	0.762082	12	0.833333	1.0935	0.831353	0.989732	18	0.777778	1.0206	1	0.994433
CDKL5	CCDS14186.1	902	887	917	0.754647	12	0.833333	1.10427	0.83079	0.987997	18	0.777778	1.03065	1	0.993933
CDKL5	CCDS14186.1	903	888	918	0.746269	12	0.833333	1.11667	0.83079	0.987135	18	0.777778	1.04222	1	0.993333
CDKL5	CCDS14186.1	904	889	919	0.738806	13	0.769231	1.04118	1	0.986399	19	0.736842	0.997342	1	0.992967
CDKL5	CCDS14186.1	905	890	920	0.741573	14	0.714286	0.963203	0.846729	0.995432	19	0.736842	0.99362	1	0.990967
CDKL5	CCDS14186.1	906	891	921	0.752809	14	0.714286	0.948827	0.840826	1	17	0.705882	0.937665	0.684486	0.9902
CDKL5	CCDS14186.1	907	892	922	0.749064	14	0.785714	1.04893	1	1	17	0.764706	1.02088	1	0.9902
CDKL5	CCDS14186.1	908	893	923	0.742537	16	0.8125	1.09422	0.855226	1	20	0.8	1.07739	0.86643	0.9902
CDKL5	CCDS14186.1	909	894	924	0.75	15	0.8	1.06667	1	1	18	0.833333	1.11111	0.68674	0.9902
CDKL5	CCDS14186.1	910	895	925	0.761194	14	0.785714	1.03221	1	1	17	0.823529	1.08189	0.855259	0.9902
CDKL5	CCDS14186.1	911	896	926	0.763158	13	0.769231	1.00796	1	1	16	0.8125	1.06466	0.854998	0.9902
CDKL5	CCDS14186.1	912	897	927	0.7603	13	0.769231	1.01175	1	1	16	0.8125	1.06866	0.854832	0.9902
CDKL5	CCDS14186.1	913	898	928	0.7603	14	0.714286	0.939479	0.837708	1	19	0.789474	1.03837	1	0.9901
CDKL5	CCDS14186.1	914	899	929	0.756554	14	0.714286	0.94413	0.839359	1	19	0.789474	1.04351	1	0.9901
CDKL5	CCDS14186.1	915	900	930	0.763158	14	0.714286	0.935961	0.837028	1	19	0.789474	1.03448	1	0.9901
CDKL5	CCDS14186.1	916	901	931	0.769811	15	0.666667	0.866013	0.485618	1	20	0.75	0.974265	0.864873	0.9901
CDKL5	CCDS14186.1	917	902	932	0.776515	15	0.666667	0.858537	0.477057	1	20	0.75	0.965854	0.862024	0.9901
CDKL5	CCDS14186.1	918	903	933	0.768939	15	0.666667	0.866995	0.486788	1	20	0.75	0.975369	0.865129	0.9901
CDKL5	CCDS14186.1	919	904	934	0.779468	15	0.666667	0.855285	0.474691	1	19	0.789474	1.01284	1	0.9901
CDKL5	CCDS14186.1	920	905	935	0.785441	15	0.666667	0.84878	0.468434	1	19	0.789474	1.00513	1	0.9901
CDKL5	CCDS14186.1	921	906	936	0.785441	14	0.714286	0.909408	0.638765	1	19	0.789474	1.00513	1	0.990133
CDKL5	CCDS14186.1	922	907	937	0.792308	12	0.666667	0.841424	0.410723	1	17	0.764706	0.965163	0.848352	0.9902
CDKL5	CCDS14186.1	923	908	938	0.8	11	0.636364	0.795455	0.366923	1	16	0.75	0.9375	0.645798	0.9902
CDKL5	CCDS14186.1	924	909	939	0.793103	11	0.636364	0.802372	0.374684	1	15	0.733333	0.924638	0.632873	0.9902
CDKL5	CCDS14186.1	925	910	940	0.793103	11	0.636364	0.802372	0.374684	1	15	0.733333	0.924638	0.632873	0.9902
CDKL5	CCDS14186.1	926	911	941	0.793103	11	0.636364	0.802372	0.374684	1	15	0.733333	0.924638	0.632873	0.9902
CDKL5	CCDS14186.1	927	912	942	0.796935	11	0.636364	0.798514	0.370346	1	15	0.733333	0.920192	0.626829	0.9902
CDKL5	CCDS14186.1	928	913	943	0.800766	11	0.636364	0.794693	0.366249	1	16	0.6875	0.858553	0.448153	0.9902
CDKL5	CCDS14186.1	929	914	944	0.793893	10	0.6	0.755769	0.237825	1	15	0.666667	0.839744	0.309472	0.9902
CDKL5	CCDS14186.1	930	915	945	0.798479	10	0.6	0.751429	0.226925	1	15	0.666667	0.834921	0.298279	0.9902
CDKL5	CCDS14186.1	931	916	946	0.790875	9	0.555556	0.702457	0.192954	1	14	0.642857	0.812843	0.280237	0.9902
CDKL5	CCDS14186.1	932	917	947	0.78327	9	0.444444	0.567422	0.0825028	0.999868	15	0.6	0.766019	0.189846	0.990167
CDKL5	CCDS14186.1	933	918	948	0.790076	9	0.444444	0.562534	0.0759891	0.999868	15	0.6	0.75942	0.180736	0.996167
CDKL5	CCDS14186.1	934	919	949	0.790875	10	0.5	0.632212	0.104305	0.999802	16	0.625	0.790264	0.203118	0.9992
CDKL5	CCDS14186.1	935	920	950	0.790875	9	0.555556	0.702457	0.192954	0.999802	15	0.666667	0.842949	0.317225	0.9992
CDKL5	CCDS14186.1	936	921	951	0.791667	8	0.625	0.789474	0.503515	0.999802	15	0.666667	0.842105	0.315184	0.999333
CDKL5	CCDS14186.1	937	922	952	0.779468	8	0.625	0.801829	0.512814	1	15	0.666667	0.855285	0.452056	0.9994
CDKL5	CCDS14186.1	938	923	953	0.776515	8	0.625	0.804878	0.515539	1	15	0.666667	0.858537	0.455811	0.999333
CDKL5	CCDS14186.1	939	924	954	0.776515	6	0.5	0.643902	0.23537	1	12	0.583333	0.75122	0.245114	0.9992
CDKL5	CCDS14186.1	940	925	955	0.776515	6	0.5	0.643902	0.23537	1	12	0.583333	0.75122	0.245114	0.999133
CDKL5	CCDS14186.1	941	926	956	0.765152	8	0.625	0.816832	0.525598	1	15	0.666667	0.871287	0.47285	0.9992
CDKL5	CCDS14186.1	942	927	957	0.763158	9	0.555556	0.727969	0.351274	1	16	0.625	0.818966	0.33663	0.9995
CDKL5	CCDS14186.1	943	928	958	0.763158	9	0.555556	0.727969	0.351274	1	16	0.625	0.818966	0.33663	0.9997
CDKL5	CCDS14186.1	944	929	959	0.763158	11	0.636364	0.833856	0.427216	1	16	0.625	0.818966	0.33663	0.9997
CDKL5	CCDS14186.1	945	930	960	0.770677	13	0.692308	0.898311	0.633207	1	18	0.666667	0.865041	0.375341	0.999767
CDKL5	CCDS14186.1	946	931	961	0.764045	13	0.692308	0.906109	0.642271	1	19	0.684211	0.895511	0.525608	0.9998
CDKL5	CCDS14186.1	947	932	962	0.757463	12	0.75	0.990148	1	1	18	0.722222	0.953476	0.859006	0.9998
CDKL5	CCDS14186.1	948	933	963	0.750929	12	0.75	0.998762	1	1	18	0.722222	0.961771	0.860841	0.9998
CDKL5	CCDS14186.1	949	934	964	0.757463	13	0.769231	1.01554	1	1	19	0.736842	0.972777	0.864098	0.9998
CDKL5	CCDS14186.1	950	935	965	0.750929	13	0.769231	1.02437	1	1	19	0.736842	0.98124	0.865972	0.9998
CDKL5	CCDS14186.1	951	936	966	0.745387	13	0.769231	1.03199	1	1	22	0.727273	0.975698	0.873035	0.9998
CDKL5	CCDS14186.1	952	937	967	0.738007	14	0.785714	1.06464	1	1	22	0.772727	1.04705	0.875239	0.999867
CDKL5	CCDS14186.1	953	938	968	0.738007	14	0.785714	1.06464	1	1	22	0.772727	1.04705	0.875239	1
CDKL5	CCDS14186.1	954	939	969	0.731618	14	0.785714	1.07394	0.852137	1	21	0.761905	1.0414	1	1
CDKL5	CCDS14186.1	955	940	970	0.726937	15	0.8	1.10051	0.85285	1	23	0.73913	1.01677	1	1
CDKL5	CCDS14186.1	956	941	971	0.719557	15	0.8	1.11179	0.697245	1	23	0.73913	1.0272	1	1
CDKL5	CCDS14186.1	957	942	972	0.719557	15	0.8	1.11179	0.697245	1	24	0.75	1.04231	0.882397	1
CDKL5	CCDS14186.1	958	943	973	0.713235	16	0.75	1.05155	1	1	25	0.72	1.00948	1	1
CDKL5	CCDS14186.1	959	944	974	0.717949	16	0.75	1.04464	1	1	24	0.75	1.04464	0.882235	1
CDKL5	CCDS14186.1	960	945	975	0.724265	15	0.733333	1.01252	1	0.999868	23	0.73913	1.02053	1	1
CDKL5	CCDS14186.1	961	946	976	0.716912	17	0.705882	0.984615	1	0.999802	25	0.72	1.00431	1	1
CDKL5	CCDS14186.1	962	947	977	0.716912	17	0.705882	0.984615	1	0.999802	25	0.72	1.00431	1	1
CDKL5	CCDS14186.1	963	948	978	0.716912	17	0.764706	1.06667	0.871008	0.999934	24	0.75	1.04615	0.882095	1
CDKL5	CCDS14186.1	964	949	979	0.716912	18	0.777778	1.0849	0.872551	1	25	0.76	1.0601	0.882551	1
CDKL5	CCDS14186.1	965	950	980	0.716912	17	0.764706	1.06667	0.871008	1	24	0.75	1.04615	0.882095	1
CDKL5	CCDS14186.1	966	951	981	0.712177	18	0.777778	1.09211	0.873139	1	27	0.777778	1.09211	0.633001	1
CDKL5	CCDS14186.1	967	952	982	0.704797	18	0.777778	1.10355	0.727164	1	27	0.777778	1.10355	0.631526	0.9998
CDKL5	CCDS14186.1	968	953	983	0.709559	18	0.777778	1.09614	0.727946	1	27	0.777778	1.09614	0.632211	0.9997
CDKL5	CCDS14186.1	969	954	984	0.716912	17	0.764706	1.06667	0.871008	1	26	0.769231	1.07298	0.757189	0.999633
CDKL5	CCDS14186.1	970	955	985	0.716912	17	0.764706	1.06667	0.871008	1	26	0.769231	1.07298	0.757189	0.9997
CDKL5	CCDS14186.1	971	956	986	0.716912	18	0.722222	1.00741	1	1	27	0.740741	1.03324	1	0.999733
CDKL5	CCDS14186.1	972	957	987	0.724265	16	0.6875	0.949239	0.86023	1	24	0.708333	0.978003	0.88088	0.999767
CDKL5	CCDS14186.1	973	958	988	0.730627	15	0.733333	1.0037	1	1	23	0.73913	1.01164	1	0.999533
CDKL5	CCDS14186.1	974	959	989	0.726937	15	0.733333	1.0088	1	1	23	0.73913	1.01677	1	0.999333
CDKL5	CCDS14186.1	975	960	990	0.726937	12	0.75	1.03173	1	1	21	0.761905	1.0481	0.874907	0.9992
CDKL5	CCDS14186.1	976	961	991	0.725926	10	0.7	0.964286	1	1	20	0.75	1.03316	1	0.999067
CDKL5	CCDS14186.1	977	962	992	0.732342	10	0.7	0.955838	0.824887	1	19	0.736842	1.00614	1	0.998833
CDKL5	CCDS14186.1	978	963	993	0.732342	11	0.636364	0.868943	0.621866	1	19	0.736842	1.00614	1	0.998733
CDKL5	CCDS14186.1	979	964	994	0.732342	12	0.583333	0.796531	0.45163	1	20	0.75	1.02411	1	0.998533
CDKL5	CCDS14186.1	980	965	995	0.734317	11	0.545455	0.742805	0.286457	1	20	0.75	1.02136	1	0.998533
CDKL5	CCDS14186.1	981	966	996	0.734317	11	0.545455	0.742805	0.286457	1	20	0.75	1.02136	1	0.998533
CDKL5	CCDS14186.1	982	967	997	0.741697	11	0.545455	0.735414	0.275325	1	17	0.764706	1.03102	1	0.998267
CDKL5	CCDS14186.1	983	968	998	0.749077	11	0.454545	0.606807	0.0967059	1	17	0.705882	0.942336	0.856796	0.998033
CDKL5	CCDS14186.1	984	969	999	0.742647	14	0.5	0.673267	0.13655	0.999934	20	0.75	1.0099	1	0.997667
CDKL5	CCDS14186.1	985	970	1000	0.745387	15	0.533333	0.715512	0.157643	0.999802	21	0.761905	1.02216	1	0.9977
CDKL5	CCDS14186.1	986	971	1001	0.757353	15	0.466667	0.616181	0.0565561	0.999802	21	0.761905	1.00601	1	0.997533
CDKL5	CCDS14186.1	987	972	1002	0.757353	15	0.466667	0.616181	0.0565561	0.999802	22	0.772727	1.0203	1	0.9969
CDKL5	CCDS14186.1	988	973	1003	0.768382	17	0.529412	0.688995	0.101095	0.999802	23	0.782609	1.01851	1	0.996633
CDKL5	CCDS14186.1	989	974	1004	0.772059	17	0.588235	0.761905	0.170575	0.999703	23	0.826087	1.06998	0.868862	0.9966
CDKL5	CCDS14186.1	990	975	1005	0.767528	17	0.588235	0.766403	0.178655	0.999802	24	0.833333	1.08574	0.722094	0.9961
CDKL5	CCDS14186.1	991	976	1006	0.761029	17	0.588235	0.772947	0.255717	0.999802	24	0.833333	1.09501	0.588376	0.995933
CDKL5	CCDS14186.1	992	977	1007	0.757353	15	0.6	0.792233	0.343092	0.999736	23	0.826087	1.09076	0.720613	0.9956
CDKL5	CCDS14186.1	993	978	1008	0.761029	15	0.6	0.788406	0.340408	0.999671	23	0.826087	1.08549	0.720613	0.995467
CDKL5	CCDS14186.1	994	979	1009	0.768382	14	0.571429	0.743677	0.204835	0.971733	22	0.818182	1.06481	0.867646	0.9872
CDKL5	CCDS14186.1	995	980	1010	0.765568	13	0.538462	0.703349	0.18423	0.960701	21	0.809524	1.05742	0.866932	0.985733
CDKL5	CCDS14186.1	996	981	1011	0.765568	15	0.6	0.783732	0.24039	0.964935	23	0.826087	1.07905	0.720613	0.988233
CDKL5	CCDS14186.1	997	982	1012	0.776557	14	0.571429	0.735849	0.194812	0.970299	20	0.8	1.03019	1	0.989867
CDKL5	CCDS14186.1	998	983	1013	0.776557	15	0.6	0.772642	0.220777	0.974769	20	0.8	1.03019	1	0.991833
CDKL5	CCDS14186.1	999	984	1014	0.783883	16	0.625	0.797313	0.237351	0.979975	21	0.809524	1.03271	1	0.993533
CDKL5	CCDS14186.1	1000	985	1015	0.783088	17	0.647059	0.826291	0.354635	0.983933	22	0.818182	1.04481	1	0.995
CDKL5	CCDS14186.1	1001	986	1016	0.783088	17	0.647059	0.826291	0.354635	0.98613	22	0.818182	1.04481	1	0.9961
CDKL5	CCDS14186.1	1002	987	1017	0.775735	16	0.6875	0.886256	0.503866	0.987266	21	0.857143	1.10494	0.697459	0.996667
CDKL5	CCDS14186.1	1003	988	1018	0.768382	16	0.6875	0.894737	0.51725	0.987936	21	0.857143	1.11552	0.549304	0.997133
CDKL5	CCDS14186.1	1004	989	1019	0.758242	16	0.6875	0.906703	0.678836	0.988167	21	0.857143	1.13043	0.549613	0.997067
CDKL5	CCDS14186.1	1005	990	1020	0.758242	17	0.705882	0.930946	0.695889	0.989205	22	0.863636	1.139	0.430009	0.997267
CDKL5	CCDS14186.1	1006	991	1021	0.763838	18	0.666667	0.872786	0.526103	0.989737	22	0.818182	1.07115	0.867973	0.997267
CDKL5	CCDS14186.1	1007	992	1022	0.764706	18	0.666667	0.871795	0.525598	0.990435	21	0.809524	1.05861	0.866931	0.997067
CDKL5	CCDS14186.1	1008	993	1023	0.764706	19	0.684211	0.894737	0.542382	0.991006	23	0.826087	1.08027	0.720613	0.996867
CDKL5	CCDS14186.1	1009	994	1024	0.772059	18	0.722222	0.93545	0.696952	0.990808	24	0.833333	1.07937	0.721838	0.9966
CDKL5	CCDS14186.1	1010	995	1025	0.772059	17	0.764706	0.990476	1	0.99094	24	0.833333	1.07937	0.721838	0.996667
CDKL5	CCDS14186.1	1011	996	1026	0.764706	18	0.722222	0.944444	0.706882	0.991105	24	0.791667	1.03526	1	0.996633
CDKL5	CCDS14186.1	1012	997	1027	0.761029	18	0.722222	0.949007	0.861229	0.991269	24	0.791667	1.04026	1	0.997333
CDKL5	CCDS14186.1	1013	998	1028	0.753676	20	0.7	0.92878	0.72062	0.991269	26	0.769231	1.02064	1	0.9973
CDKL5	CCDS14186.1	1014	999	1029	0.746324	19	0.736842	0.987296	1	0.990869	27	0.814815	1.09177	0.615232	0.997633
CDKL5	CCDS14186.1	1015	1000	1030	0.752768	16	0.75	0.996324	1	0.990561	24	0.791667	1.05167	0.875883	0.9976
CDKL5	CCDS14186.1	1016	1001	1031	0.752852	15	0.733333	0.974074	0.852549	0.990632	23	0.782609	1.03953	1	0.997033
CDKL5	CCDS14186.1	1017	1002	1032	0.748031	14	0.785714	1.05038	1	0.989864	21	0.809524	1.08221	0.717494	0.997
CDKL5	CCDS14186.1	1018	1003	1033	0.75102	14	0.785714	1.0462	1	0.989869	20	0.8	1.06522	0.866144	0.9973
CDKL5	CCDS14186.1	1019	1004	1034	0.741525	12	0.75	1.01143	1	0.990297	18	0.777778	1.04889	1	0.997133
CDKL5	CCDS14186.1	1020	1005	1035	0.740088	11	0.727273	0.982684	1	0.989035	17	0.764706	1.03326	1	0.997067
CDKL5	CCDS14186.1	1021	1006	1036	0.73516	11	0.727273	0.989272	1	0.988535	16	0.75	1.02019	1	0.996967
CDKL5	CCDS14186.1	1022	1007	1037	0.738095	11	0.727273	0.985337	1	0.988403	16	0.75	1.01613	1	0.9968
CDKL5	CCDS14186.1	1023	1008	1038	0.746269	11	0.727273	0.974545	1	0.989128	15	0.8	1.072	0.85351	0.996
CDKL5	CCDS14186.1	1024	1009	1039	0.744792	11	0.727273	0.976478	1	0.987832	15	0.8	1.07413	0.853225	0.995933
CDKL5	CCDS14186.1	1025	1010	1040	0.737705	11	0.727273	0.985859	1	0.985328	15	0.8	1.08444	0.852476	0.994867
CDKL5	CCDS14186.1	1026	1011	1041	0.735632	11	0.727273	0.988636	1	0.982429	15	0.8	1.0875	0.852412	0.993867
CDKL5	CCDS14186.1	1027	1012	1042	0.739394	9	0.666667	0.901639	0.806777	0.981929	13	0.769231	1.04035	1	0.993667
CDKL5	CCDS14186.1	1028	1013	1043	0.732484	9	0.666667	0.910145	0.809904	0.9802	13	0.769231	1.05017	1	0.9918
CDKL5	CCDS14186.1	1029	1014	1044	0.736486	8	0.625	0.848624	0.565371	0.976834	13	0.769231	1.04446	1	0.990867
CDKL5	CCDS14186.1	1030	1015	1045	0.726619	7	0.571429	0.786421	0.524928	0.973204	12	0.75	1.03218	1	0.9896
GRIN2A	CCDS10539.1	1	1	16	0.669231	3	0.333333	0.498084	0.375536	0.910503	3	1	1.49425	0.657495	0.954867
GRIN2A	CCDS10539.1	2	1	17	0.669065	3	0.333333	0.498208	0.375853	0.911102	4	0.75	1.12097	1	0.954533
GRIN2A	CCDS10539.1	3	1	18	0.684932	3	0.333333	0.486667	0.356384	0.912172	4	0.75	1.095	1	0.9567
GRIN2A	CCDS10539.1	4	1	19	0.683871	4	0.5	0.731132	0.711912	0.913364	4	0.75	1.0967	1	0.9582
GRIN2A	CCDS10539.1	5	1	20	0.682927	7	0.571429	0.836735	0.792697	0.916302	6	0.666667	0.97619	1	0.958567
GRIN2A	CCDS10539.1	6	1	21	0.682081	8	0.625	0.916314	0.81386	0.918668	7	0.714286	1.04722	1	0.960167
GRIN2A	CCDS10539.1	7	1	22	0.681319	9	0.555556	0.815412	0.601761	0.920562	8	0.625	0.917339	0.804778	0.960367
GRIN2A	CCDS10539.1	8	1	23	0.680628	11	0.454545	0.667832	0.217842	0.921732	11	0.545455	0.801399	0.450509	0.960067
GRIN2A	CCDS10539.1	9	1	24	0.69	12	0.5	0.724638	0.32782	0.922331	12	0.583333	0.845411	0.636184	0.9598
GRIN2A	CCDS10539.1	10	1	25	0.688995	13	0.538462	0.781517	0.363766	0.922666	12	0.583333	0.846644	0.636653	0.9595
GRIN2A	CCDS10539.1	11	1	26	0.688073	15	0.533333	0.775111	0.382894	0.922001	15	0.6	0.872	0.677571	0.9603
GRIN2A	CCDS10539.1	12	1	27	0.687225	16	0.5	0.727564	0.212449	0.924033	16	0.625	0.909455	0.693459	0.960733
GRIN2A	CCDS10539.1	13	1	28	0.693617	17	0.529412	0.763262	0.299781	0.923764	17	0.647059	0.932876	0.864667	0.961267
GRIN2A	CCDS10539.1	14	1	29	0.699588	18	0.555556	0.794118	0.318873	0.925867	18	0.666667	0.952941	0.866499	0.962433
GRIN2A	CCDS10539.1	15	1	30	0.698413	18	0.555556	0.795455	0.320485	0.926965	18	0.666667	0.954545	0.866694	0.963067
GRIN2A	CCDS10539.1	16	1	31	0.697318	18	0.555556	0.796703	0.321972	0.925532	19	0.684211	0.981203	1	0.963533
GRIN2A	CCDS10539.1	17	2	32	0.696296	19	0.526316	0.755879	0.238952	0.924933	21	0.666667	0.957447	0.875239	0.963667
GRIN2A	CCDS10539.1	18	3	33	0.696296	19	0.526316	0.755879	0.238952	0.925032	23	0.652174	0.936633	0.743493	0.9635
GRIN2A	CCDS10539.1	19	4	34	0.690037	19	0.526316	0.762736	0.245118	0.925169	23	0.652174	0.945129	0.748949	0.964667
GRIN2A	CCDS10539.1	20	5	35	0.697417	19	0.526316	0.754664	0.237909	0.9292	23	0.652174	0.935128	0.742809	0.965433
GRIN2A	CCDS10539.1	21	6	36	0.701107	19	0.526316	0.750693	0.235027	0.930199	22	0.636364	0.907656	0.597094	0.9657
GRIN2A	CCDS10539.1	22	7	37	0.695971	19	0.526316	0.756233	0.239183	0.931166	22	0.636364	0.914354	0.734217	0.965667
GRIN2A	CCDS10539.1	23	8	38	0.687273	19	0.526316	0.765803	0.248449	0.933164	22	0.636364	0.925926	0.737636	0.968133
GRIN2A	CCDS10539.1	24	9	39	0.698182	19	0.526316	0.753838	0.237456	0.93513	22	0.636364	0.911458	0.600392	0.970067
GRIN2A	CCDS10539.1	25	10	40	0.698182	20	0.55	0.78776	0.258218	0.936003	23	0.652174	0.934103	0.742306	0.9707
GRIN2A	CCDS10539.1	26	11	41	0.701818	21	0.52381	0.746361	0.185973	0.935564	24	0.625	0.890544	0.607429	0.9716
GRIN2A	CCDS10539.1	27	12	42	0.709091	19	0.526316	0.74224	0.229318	0.939902	24	0.583333	0.82265	0.272931	0.975467
GRIN2A	CCDS10539.1	28	13	43	0.72	19	0.526316	0.730994	0.156398	0.947567	24	0.583333	0.810185	0.259841	0.978133
GRIN2A	CCDS10539.1	29	14	44	0.727273	18	0.555556	0.763889	0.214093	0.954634	23	0.565217	0.777174	0.174891	0.980167
GRIN2A	CCDS10539.1	30	15	45	0.734545	18	0.555556	0.756326	0.204407	0.959438	24	0.583333	0.794142	0.18351	0.981367
GRIN2A	CCDS10539.1	31	16	46	0.734545	18	0.555556	0.756326	0.204407	0.963837	25	0.6	0.816832	0.260364	0.982767
GRIN2A	CCDS10539.1	32	17	47	0.738182	18	0.555556	0.7526	0.200336	0.965067	26	0.615385	0.833649	0.270472	0.9836
GRIN2A	CCDS10539.1	33	18	48	0.744526	18	0.555556	0.746187	0.194027	0.966401	25	0.64	0.859608	0.353111	0.984
GRIN2A	CCDS10539.1	34	19	49	0.735507	19	0.578947	0.78714	0.228894	0.969805	26	0.653846	0.888973	0.48106	0.9862
GRIN2A	CCDS10539.1	35	20	50	0.741818	18	0.555556	0.748911	0.196767	0.974363	27	0.666667	0.898693	0.487855	0.9876
GRIN2A	CCDS10539.1	36	21	51	0.741818	16	0.5625	0.758272	0.254462	0.977663	26	0.692308	0.933258	0.743872	0.988367
GRIN2A	CCDS10539.1	37	22	52	0.737226	15	0.533333	0.723432	0.169552	0.9802	25	0.68	0.922376	0.605007	0.9883
GRIN2A	CCDS10539.1	38	23	53	0.737226	14	0.571429	0.775106	0.339485	0.9835	24	0.708333	0.960809	0.877023	0.989267
GRIN2A	CCDS10539.1	39	24	54	0.733577	14	0.642857	0.876333	0.66539	0.985531	23	0.73913	1.00757	1	0.989767
GRIN2A	CCDS10539.1	40	25	55	0.735294	13	0.615385	0.836923	0.476666	0.986564	22	0.727273	0.989091	1	0.990333
GRIN2A	CCDS10539.1	41	26	56	0.735294	14	0.571429	0.777143	0.341215	0.988299	24	0.708333	0.963333	0.877257	0.990367
GRIN2A	CCDS10539.1	42	27	57	0.735294	13	0.538462	0.732308	0.222051	0.988996	22	0.681818	0.927273	0.721838	0.9917
GRIN2A	CCDS10539.1	43	28	58	0.741697	13	0.615385	0.829698	0.469563	0.989803	22	0.681818	0.919267	0.581238	0.9931
GRIN2A	CCDS10539.1	44	29	59	0.741697	13	0.615385	0.829698	0.469563	0.991368	22	0.681818	0.919267	0.581238	0.993967
GRIN2A	CCDS10539.1	45	30	60	0.735294	13	0.615385	0.836923	0.476666	0.992433	23	0.695652	0.946087	0.732165	0.994833
GRIN2A	CCDS10539.1	46	31	61	0.735294	16	0.625	0.85	0.519173	0.992867	26	0.692308	0.941538	0.747393	0.994933
GRIN2A	CCDS10539.1	47	32	62	0.735294	16	0.625	0.85	0.519173	0.993263	27	0.62963	0.856296	0.375341	0.995
GRIN2A	CCDS10539.1	48	33	63	0.731618	15	0.666667	0.911223	0.68511	0.993729	25	0.64	0.874774	0.47227	0.994967
GRIN2A	CCDS10539.1	49	34	64	0.731618	15	0.666667	0.911223	0.68511	0.994202	25	0.64	0.874774	0.47227	0.994933
GRIN2A	CCDS10539.1	50	35	65	0.731618	16	0.625	0.854271	0.521562	0.994498	27	0.62963	0.860599	0.377903	0.995133
GRIN2A	CCDS10539.1	51	36	66	0.731618	16	0.625	0.854271	0.521562	0.994899	27	0.62963	0.860599	0.377903	0.995533
GRIN2A	CCDS10539.1	52	37	67	0.727941	16	0.625	0.858586	0.524285	0.994965	27	0.62963	0.864946	0.381355	0.995267
GRIN2A	CCDS10539.1	53	38	68	0.735294	16	0.625	0.85	0.519173	0.995135	28	0.642857	0.874286	0.387392	0.995467
GRIN2A	CCDS10539.1	54	39	69	0.735294	16	0.625	0.85	0.519173	0.995135	29	0.655172	0.891034	0.504733	0.9953
GRIN2A	CCDS10539.1	55	40	70	0.724265	17	0.647059	0.893401	0.703208	0.995569	30	0.666667	0.920474	0.642882	0.995133
GRIN2A	CCDS10539.1	56	41	71	0.727941	16	0.625	0.858586	0.524285	0.995404	29	0.655172	0.900035	0.510021	0.995133
GRIN2A	CCDS10539.1	57	42	72	0.724265	15	0.666667	0.920474	0.693074	0.995766	28	0.678571	0.936911	0.7626	0.9951
GRIN2A	CCDS10539.1	58	43	73	0.713235	17	0.647059	0.907216	0.709114	0.996327	29	0.689655	0.966939	0.89532	0.995
GRIN2A	CCDS10539.1	59	44	74	0.716912	19	0.684211	0.954386	0.878089	0.996738	31	0.709677	0.989909	1	0.994833
GRIN2A	CCDS10539.1	60	45	75	0.716912	20	0.65	0.906667	0.591801	0.996601	32	0.6875	0.958974	0.788315	0.9946
GRIN2A	CCDS10539.1	61	46	76	0.709559	20	0.65	0.916062	0.735168	0.996568	33	0.69697	0.982258	0.907345	0.9944
GRIN2A	CCDS10539.1	62	47	77	0.709559	20	0.65	0.916062	0.735168	0.996799	33	0.666667	0.939551	0.669862	0.994567
GRIN2A	CCDS10539.1	63	48	78	0.716912	20	0.65	0.906667	0.591801	0.997035	32	0.65625	0.915385	0.543064	0.994333
GRIN2A	CCDS10539.1	64	49	79	0.710623	20	0.65	0.914691	0.734848	0.99743	33	0.666667	0.938144	0.668916	0.994033
GRIN2A	CCDS10539.1	65	50	80	0.716912	21	0.666667	0.929915	0.742005	0.997732	35	0.685714	0.956484	0.797946	0.994467
GRIN2A	CCDS10539.1	66	51	81	0.717949	21	0.666667	0.928571	0.741128	0.99776	34	0.676471	0.942227	0.671762	0.994333
GRIN2A	CCDS10539.1	67	52	82	0.717949	20	0.65	0.905357	0.590447	0.997935	33	0.666667	0.928571	0.663177	0.9951
GRIN2A	CCDS10539.1	68	53	83	0.726277	21	0.666667	0.917923	0.736613	0.997694	34	0.676471	0.931422	0.66514	0.995533
GRIN2A	CCDS10539.1	69	54	84	0.726277	23	0.608696	0.838104	0.361743	0.997897	37	0.648649	0.893114	0.377038	0.995433
GRIN2A	CCDS10539.1	70	55	85	0.737226	22	0.590909	0.80153	0.250922	0.998237	36	0.638889	0.866612	0.279173	0.996133
GRIN2A	CCDS10539.1	71	56	86	0.728261	22	0.590909	0.811398	0.262014	0.998172	38	0.631579	0.867243	0.296925	0.996467
GRIN2A	CCDS10539.1	72	57	87	0.734545	20	0.6	0.816832	0.321972	0.998303	36	0.638889	0.869774	0.284096	0.996333
GRIN2A	CCDS10539.1	73	58	88	0.741818	20	0.6	0.808824	0.314085	0.998303	37	0.648649	0.874404	0.286326	0.996867
GRIN2A	CCDS10539.1	74	59	89	0.735507	19	0.578947	0.78714	0.228894	0.998369	37	0.621622	0.84516	0.220737	0.997467
GRIN2A	CCDS10539.1	75	60	90	0.740072	18	0.555556	0.750678	0.198404	0.998237	38	0.631579	0.853402	0.226009	0.997467
GRIN2A	CCDS10539.1	76	61	91	0.740072	17	0.529412	0.715352	0.130905	0.998435	36	0.611111	0.825745	0.158905	0.997533
GRIN2A	CCDS10539.1	77	62	92	0.740072	15	0.533333	0.72065	0.165219	0.9986	34	0.617647	0.834577	0.198179	0.997767
GRIN2A	CCDS10539.1	78	63	93	0.740072	18	0.555556	0.750678	0.198404	0.998797	35	0.657143	0.887944	0.354436	0.9982
GRIN2A	CCDS10539.1	79	64	94	0.743682	18	0.555556	0.747033	0.194901	0.998797	36	0.666667	0.89644	0.445117	0.998533
GRIN2A	CCDS10539.1	80	65	95	0.747292	19	0.526316	0.704297	0.0964081	0.998797	35	0.657143	0.879365	0.343768	0.998867
GRIN2A	CCDS10539.1	81	66	96	0.758123	20	0.55	0.725476	0.101095	0.998732	35	0.657143	0.866803	0.258481	0.9988
GRIN2A	CCDS10539.1	82	67	97	0.750903	20	0.55	0.732452	0.144031	0.998797	35	0.657143	0.875137	0.340067	0.998933
GRIN2A	CCDS10539.1	83	68	98	0.750903	21	0.52381	0.697573	0.0731029	0.998863	38	0.605263	0.806048	0.116441	0.9993
GRIN2A	CCDS10539.1	84	69	99	0.743682	22	0.545455	0.733451	0.118044	0.998863	38	0.605263	0.813873	0.122415	0.9994
GRIN2A	CCDS10539.1	85	70	100	0.750903	22	0.545455	0.726399	0.112174	0.998863	37	0.594595	0.79184	0.0817018	0.9994
GRIN2A	CCDS10539.1	86	71	101	0.750903	21	0.52381	0.697573	0.0731029	0.998863	36	0.583333	0.776843	0.0750446	0.9994
GRIN2A	CCDS10539.1	87	72	102	0.758123	22	0.5	0.659524	0.0454192	0.998863	38	0.578947	0.763659	0.0423282	0.9994
GRIN2A	CCDS10539.1	88	73	103	0.768953	22	0.5	0.650235	0.0408828	0.998896	38	0.578947	0.752903	0.0362621	0.9995
GRIN2A	CCDS10539.1	89	74	104	0.772563	20	0.5	0.647196	0.0367242	0.999028	36	0.583333	0.755062	0.0448036	0.9995
GRIN2A	CCDS10539.1	90	75	105	0.768953	18	0.444444	0.577986	0.0221638	0.998962	34	0.558824	0.726733	0.0269809	0.9995
GRIN2A	CCDS10539.1	91	76	106	0.768116	17	0.470588	0.612653	0.0380204	0.998896	33	0.575758	0.749571	0.0409613	0.999633
GRIN2A	CCDS10539.1	92	77	107	0.774545	17	0.470588	0.607567	0.0341245	0.998929	31	0.548387	0.708012	0.0208046	0.9997
GRIN2A	CCDS10539.1	93	78	108	0.774545	18	0.444444	0.573813	0.0199961	0.998962	31	0.548387	0.708012	0.0208046	0.9997
GRIN2A	CCDS10539.1	94	79	109	0.767273	19	0.421053	0.548765	0.0142854	0.999094	32	0.53125	0.692387	0.0156992	0.9997
GRIN2A	CCDS10539.1	95	80	110	0.767273	19	0.421053	0.548765	0.0142854	0.999094	31	0.516129	0.67268	0.0125904	0.999767
GRIN2A	CCDS10539.1	96	81	111	0.767273	18	0.388889	0.506846	0.0102763	0.99916	29	0.448276	0.584246	0.00277429	0.9998
GRIN2A	CCDS10539.1	97	82	112	0.770909	18	0.388889	0.504455	0.00957405	0.999028	30	0.466667	0.605346	0.00334948	0.9998
GRIN2A	CCDS10539.1	98	83	113	0.767273	18	0.388889	0.506846	0.0102763	0.999094	30	0.466667	0.608215	0.00381705	0.9998
GRIN2A	CCDS10539.1	99	84	114	0.770909	17	0.352941	0.457825	0.00626492	0.99916	29	0.448276	0.58149	0.00248436	0.999733
GRIN2A	CCDS10539.1	100	85	115	0.778182	15	0.4	0.514019	0.0166674	0.999193	26	0.461538	0.593098	0.00431767	0.999767
GRIN2A	CCDS10539.1	101	86	116	0.774545	14	0.428571	0.55332	0.0311128	0.999127	26	0.5	0.64554	0.0163468	0.9998
GRIN2A	CCDS10539.1	102	87	117	0.774545	14	0.428571	0.55332	0.0311128	0.99916	24	0.5	0.64554	0.0217365	0.9998
GRIN2A	CCDS10539.1	103	88	118	0.768116	14	0.428571	0.557951	0.0349021	0.999127	24	0.5	0.650943	0.0229622	0.9997
GRIN2A	CCDS10539.1	104	89	119	0.768116	13	0.461538	0.600871	0.0603792	0.999193	23	0.478261	0.622642	0.0131845	0.9997
GRIN2A	CCDS10539.1	105	90	120	0.768116	14	0.428571	0.557951	0.0349021	0.999193	23	0.478261	0.622642	0.0131845	0.9997
GRIN2A	CCDS10539.1	106	91	121	0.764493	15	0.4	0.523223	0.0211638	0.999061	22	0.409091	0.535114	0.0040053	0.999567
GRIN2A	CCDS10539.1	107	92	122	0.764493	16	0.4375	0.572275	0.029564	0.999094	25	0.4	0.523223	0.001864	0.999567
GRIN2A	CCDS10539.1	108	93	123	0.764493	15	0.4	0.523223	0.0211638	0.999094	24	0.375	0.490521	0.00128323	0.9997
GRIN2A	CCDS10539.1	109	94	124	0.768116	12	0.333333	0.433962	0.0164536	0.999028	22	0.363636	0.473413	0.00134991	0.9998
GRIN2A	CCDS10539.1	110	95	125	0.770909	12	0.333333	0.43239	0.0159123	0.99916	21	0.333333	0.43239	0.000816889	0.9998
GRIN2A	CCDS10539.1	111	96	126	0.767273	12	0.333333	0.434439	0.0165494	0.999193	21	0.333333	0.434439	0.000925491	0.9998
GRIN2A	CCDS10539.1	112	97	127	0.763636	10	0.3	0.392857	0.0202466	0.99916	19	0.315789	0.413534	0.00119106	0.9998
GRIN2A	CCDS10539.1	113	98	128	0.770909	10	0.3	0.389151	0.0182691	0.999193	19	0.315789	0.409633	0.000973808	0.9998
GRIN2A	CCDS10539.1	114	99	129	0.770909	9	0.333333	0.43239	0.0349021	0.999336	16	0.375	0.486439	0.00648066	0.9998
GRIN2A	CCDS10539.1	115	100	130	0.770909	8	0.25	0.324292	0.0208643	0.999237	15	0.333333	0.43239	0.00399148	0.9998
GRIN2A	CCDS10539.1	116	101	131	0.763636	8	0.25	0.327381	0.0225884	0.998962	15	0.333333	0.436508	0.00473287	0.999633
GRIN2A	CCDS10539.1	117	102	132	0.763636	8	0.25	0.327381	0.0225884	0.998896	15	0.333333	0.436508	0.00473287	0.999467
GRIN2A	CCDS10539.1	118	103	133	0.767273	7	0.285714	0.372376	0.0437189	0.998896	14	0.357143	0.465471	0.00854805	0.9995
GRIN2A	CCDS10539.1	119	104	134	0.763636	8	0.375	0.491071	0.0713721	0.998896	16	0.375	0.491071	0.00753271	0.9995
GRIN2A	CCDS10539.1	120	105	135	0.774545	8	0.375	0.484155	0.0636479	0.998896	16	0.375	0.484155	0.00589046	0.999467
GRIN2A	CCDS10539.1	121	106	136	0.767273	8	0.375	0.488744	0.0686514	0.998896	16	0.375	0.488744	0.00702568	0.9994
GRIN2A	CCDS10539.1	122	107	137	0.768116	8	0.375	0.488208	0.0681338	0.998797	16	0.375	0.488208	0.00689959	0.9994
GRIN2A	CCDS10539.1	123	108	138	0.768116	8	0.375	0.488208	0.0681338	0.998797	16	0.375	0.488208	0.00689959	0.9994
GRIN2A	CCDS10539.1	124	109	139	0.775362	7	0.428571	0.552737	0.121223	0.998797	15	0.4	0.515888	0.0114351	0.9994
GRIN2A	CCDS10539.1	125	110	140	0.775362	10	0.5	0.64486	0.124983	0.998797	18	0.444444	0.573209	0.0130893	0.999333
GRIN2A	CCDS10539.1	126	111	141	0.775362	13	0.538462	0.694464	0.176906	0.998666	21	0.47619	0.614152	0.0141735	0.9994
GRIN2A	CCDS10539.1	127	112	142	0.768953	13	0.461538	0.600217	0.0596231	0.998797	21	0.47619	0.619271	0.0166135	0.999267
GRIN2A	CCDS10539.1	128	113	143	0.758123	13	0.461538	0.608791	0.068914	0.998666	20	0.45	0.593571	0.0153562	0.9992
GRIN2A	CCDS10539.1	129	114	144	0.768953	14	0.428571	0.557344	0.0346023	0.998402	21	0.428571	0.557344	0.0065159	0.999333
GRIN2A	CCDS10539.1	130	115	145	0.768953	14	0.428571	0.557344	0.0346023	0.998336	21	0.428571	0.557344	0.0065159	0.9994
GRIN2A	CCDS10539.1	131	116	146	0.768116	14	0.428571	0.557951	0.0349021	0.998303	21	0.428571	0.557951	0.00666487	0.9994
GRIN2A	CCDS10539.1	132	117	147	0.771739	14	0.428571	0.555332	0.0328228	0.998303	20	0.4	0.51831	0.00404696	0.9994
GRIN2A	CCDS10539.1	133	118	148	0.770909	14	0.428571	0.55593	0.0333489	0.998172	20	0.4	0.518868	0.0041417	0.9994
GRIN2A	CCDS10539.1	134	119	149	0.770909	16	0.375	0.486439	0.011358	0.99804	22	0.363636	0.471698	0.00126827	0.9994
GRIN2A	CCDS10539.1	135	120	150	0.763636	16	0.375	0.491071	0.0131063	0.997661	21	0.380952	0.498866	0.00275598	0.999267
GRIN2A	CCDS10539.1	136	121	151	0.767273	16	0.375	0.488744	0.0122363	0.997496	22	0.363636	0.473934	0.00136937	0.999433
GRIN2A	CCDS10539.1	137	122	152	0.766423	15	0.4	0.521905	0.0205727	0.997364	22	0.363636	0.474459	0.00140521	0.9995
GRIN2A	CCDS10539.1	138	123	153	0.772894	15	0.4	0.517536	0.0184057	0.997266	20	0.4	0.517536	0.00394396	0.9995
GRIN2A	CCDS10539.1	139	124	154	0.779412	15	0.4	0.513208	0.0164667	0.942828	20	0.4	0.513208	0.00325935	0.9363
GRIN2A	CCDS10539.1	140	125	155	0.775735	15	0.4	0.51564	0.0174632	0.9443	20	0.4	0.51564	0.00364507	0.938067
GRIN2A	CCDS10539.1	141	126	156	0.772894	17	0.411765	0.532757	0.0153599	0.945936	22	0.363636	0.470487	0.0012136	0.939733
GRIN2A	CCDS10539.1	142	127	157	0.772894	16	0.4375	0.566055	0.0250182	0.950494	21	0.380952	0.492891	0.00216938	0.943033
GRIN2A	CCDS10539.1	143	128	158	0.78022	16	0.4375	0.560739	0.0221638	0.952866	21	0.380952	0.488263	0.00172266	0.944733
GRIN2A	CCDS10539.1	144	129	159	0.769231	16	0.4375	0.56875	0.0269313	0.953865	21	0.380952	0.495238	0.00239646	0.9482
GRIN2A	CCDS10539.1	145	130	160	0.775735	16	0.4375	0.563981	0.0237889	0.954634	21	0.380952	0.491086	0.00198593	0.9498
GRIN2A	CCDS10539.1	146	131	161	0.779412	16	0.4375	0.561321	0.022403	0.955364	22	0.409091	0.524871	0.00260702	0.952167
GRIN2A	CCDS10539.1	147	132	162	0.790441	16	0.4375	0.553488	0.0185154	0.957269	22	0.409091	0.517548	0.00190677	0.954267
GRIN2A	CCDS10539.1	148	133	163	0.797048	16	0.4375	0.5489	0.0164405	0.960004	22	0.409091	0.513258	0.00152668	0.956633
GRIN2A	CCDS10539.1	149	134	164	0.793358	17	0.411765	0.519015	0.0102763	0.963299	22	0.363636	0.458351	0.000603909	0.9595
GRIN2A	CCDS10539.1	150	135	165	0.795539	16	0.375	0.471379	0.00666409	0.9684	20	0.35	0.439953	0.000694221	0.963433
GRIN2A	CCDS10539.1	151	136	166	0.791822	16	0.375	0.473592	0.00723422	0.970832	22	0.409091	0.516645	0.00182324	0.966733
GRIN2A	CCDS10539.1	152	137	167	0.801498	16	0.375	0.467874	0.0057112	0.973034	22	0.409091	0.510408	0.00134991	0.9688
GRIN2A	CCDS10539.1	153	138	168	0.801498	16	0.375	0.467874	0.0057112	0.975236	22	0.409091	0.510408	0.00134991	0.9718
GRIN2A	CCDS10539.1	154	139	169	0.794776	17	0.352941	0.444076	0.00356568	0.977366	24	0.375	0.471831	0.00045105	0.9748
GRIN2A	CCDS10539.1	155	140	170	0.794776	18	0.333333	0.419405	0.00200858	0.978799	25	0.36	0.452958	0.000249929	0.977833
GRIN2A	CCDS10539.1	156	141	171	0.794776	15	0.266667	0.335524	0.00141647	0.982094	22	0.318182	0.400341	0.000198113	0.979733
GRIN2A	CCDS10539.1	157	142	172	0.791045	12	0.166667	0.210692	0.000902243	0.986333	19	0.263158	0.332671	0.000171283	0.9817
GRIN2A	CCDS10539.1	158	143	173	0.791045	11	0.181818	0.229846	0.0019108	0.988766	18	0.277778	0.351153	0.000304033	0.983467
GRIN2A	CCDS10539.1	159	144	174	0.791045	13	0.153846	0.194485	0.000409352	0.988766	20	0.25	0.316038	8.33468e-05	0.9849
GRIN2A	CCDS10539.1	160	145	175	0.783582	12	0.166667	0.212698	0.00114773	0.990632	19	0.263158	0.33584	0.000198155	0.9872
GRIN2A	CCDS10539.1	161	146	176	0.779851	12	0.166667	0.213716	0.00120899	0.991928	19	0.263158	0.337446	0.000218701	0.988433
GRIN2A	CCDS10539.1	162	147	177	0.780669	12	0.166667	0.213492	0.00120899	0.992604	19	0.263158	0.337093	0.000209809	0.989633
GRIN2A	CCDS10539.1	163	148	178	0.773234	12	0.166667	0.215545	0.00138107	0.993296	19	0.263158	0.340334	0.000270926	0.990433
GRIN2A	CCDS10539.1	164	149	179	0.774074	12	0.166667	0.215311	0.00138072	0.9939	21	0.238095	0.307587	7.31082e-05	0.990967
GRIN2A	CCDS10539.1	165	150	180	0.779851	11	0.181818	0.233145	0.00229032	0.994366	20	0.25	0.320574	0.000124141	0.991567
GRIN2A	CCDS10539.1	166	151	181	0.783582	12	0.166667	0.212698	0.00114773	0.995003	21	0.238095	0.303855	4.28898e-05	0.992667
GRIN2A	CCDS10539.1	167	152	182	0.786517	11	0.181818	0.231169	0.00212965	0.995404	19	0.263158	0.334586	0.000192272	0.9937
GRIN2A	CCDS10539.1	168	153	183	0.787313	13	0.230769	0.29311	0.00195985	0.996332	20	0.3	0.381043	0.000297548	0.993833
GRIN2A	CCDS10539.1	169	154	184	0.784387	13	0.153846	0.196136	0.000454741	0.996771	20	0.25	0.31872	0.000109895	0.994133
GRIN2A	CCDS10539.1	170	155	185	0.785185	13	0.153846	0.195936	0.00044725	0.997167	21	0.238095	0.303235	3.9576e-05	0.994567
GRIN2A	CCDS10539.1	171	156	186	0.792593	14	0.142857	0.18024	0.000252305	0.997793	21	0.190476	0.24032	3.26083e-06	0.995
GRIN2A	CCDS10539.1	172	157	187	0.792593	13	0.153846	0.194105	0.000405699	0.997897	21	0.238095	0.300401	2.51221e-05	0.995367
GRIN2A	CCDS10539.1	173	158	188	0.799257	13	0.153846	0.192487	0.000346791	0.998106	21	0.238095	0.297896	1.80168e-05	0.9958
GRIN2A	CCDS10539.1	174	159	189	0.788104	14	0.214286	0.2719	0.000939825	0.998369	24	0.291667	0.370086	6.693e-05	0.996067
GRIN2A	CCDS10539.1	175	160	190	0.791822	14	0.214286	0.270624	0.000830879	0.998534	25	0.32	0.404131	0.000107746	0.996167
GRIN2A	CCDS10539.1	176	161	191	0.785185	14	0.214286	0.272911	0.00104202	0.998501	25	0.32	0.407547	0.000131016	0.996333
GRIN2A	CCDS10539.1	177	162	192	0.788889	15	0.266667	0.338028	0.0015997	0.998468	25	0.32	0.405634	0.000118534	0.9967
GRIN2A	CCDS10539.1	178	163	193	0.785185	15	0.266667	0.339623	0.00179344	0.998995	26	0.346154	0.440856	0.000198113	0.996667
GRIN2A	CCDS10539.1	179	164	194	0.785978	15	0.266667	0.33928	0.00175584	0.998929	26	0.346154	0.440412	0.000195641	0.996967
GRIN2A	CCDS10539.1	180	165	195	0.785978	14	0.285714	0.363514	0.00328671	0.998896	26	0.384615	0.489346	0.000499139	0.997
GRIN2A	CCDS10539.1	181	166	196	0.78022	14	0.285714	0.366197	0.00386588	0.999094	26	0.384615	0.492958	0.000603909	0.997
GRIN2A	CCDS10539.1	182	167	197	0.772894	15	0.266667	0.345024	0.00229032	0.999094	25	0.32	0.414028	0.000198113	0.9971
GRIN2A	CCDS10539.1	183	168	198	0.772894	15	0.266667	0.345024	0.00229032	0.999264	25	0.32	0.414028	0.000198113	0.9972
GRIN2A	CCDS10539.1	184	169	199	0.772894	15	0.266667	0.345024	0.00229032	0.999264	26	0.346154	0.447867	0.000297548	0.9972
GRIN2A	CCDS10539.1	185	170	200	0.783883	15	0.333333	0.425234	0.00566447	0.999297	26	0.423077	0.53972	0.00143511	0.9972
GRIN2A	CCDS10539.1	186	171	201	0.783088	15	0.4	0.510798	0.0155832	0.999473	27	0.481481	0.61485	0.00512239	0.9972
GRIN2A	CCDS10539.1	187	172	202	0.790441	14	0.428571	0.542193	0.0231168	0.999506	26	0.5	0.632558	0.00721931	0.997
GRIN2A	CCDS10539.1	188	173	203	0.794118	14	0.428571	0.539683	0.0221603	0.999506	28	0.535714	0.674603	0.0114998	0.9972
GRIN2A	CCDS10539.1	189	174	204	0.797794	15	0.466667	0.584946	0.0283139	0.999506	29	0.551724	0.691562	0.0180974	0.997333
GRIN2A	CCDS10539.1	190	175	205	0.797794	13	0.538462	0.674938	0.0906849	0.999506	27	0.592593	0.742789	0.0435134	0.9974
GRIN2A	CCDS10539.1	191	176	206	0.794118	13	0.538462	0.678063	0.0956741	0.999506	27	0.592593	0.746228	0.0463537	0.997433
GRIN2A	CCDS10539.1	192	177	207	0.797794	13	0.538462	0.674938	0.0906849	0.999506	27	0.592593	0.742789	0.0435134	0.997633
GRIN2A	CCDS10539.1	193	178	208	0.790441	14	0.571429	0.722924	0.182699	0.999506	28	0.607143	0.768106	0.0765369	0.997567
GRIN2A	CCDS10539.1	194	179	209	0.790441	15	0.6	0.75907	0.200316	0.999506	29	0.62069	0.785245	0.0836248	0.997467
GRIN2A	CCDS10539.1	195	180	210	0.797794	15	0.6	0.752074	0.192297	0.999506	27	0.666667	0.835637	0.170157	0.997633
GRIN2A	CCDS10539.1	196	181	211	0.798535	15	0.6	0.751376	0.19149	0.999506	28	0.678571	0.849771	0.241182	0.9978
GRIN2A	CCDS10539.1	197	182	212	0.802198	14	0.642857	0.80137	0.281594	0.999506	28	0.714286	0.890411	0.339715	0.997933
GRIN2A	CCDS10539.1	198	183	213	0.79562	15	0.666667	0.83792	0.326913	0.999703	29	0.724138	0.910155	0.46263	0.998
GRIN2A	CCDS10539.1	199	184	214	0.794872	13	0.692308	0.870968	0.446014	0.999703	27	0.740741	0.9319	0.581933	0.998
GRIN2A	CCDS10539.1	200	185	215	0.791209	12	0.75	0.947917	0.819033	0.999638	26	0.769231	0.972222	0.873035	0.998
GRIN2A	CCDS10539.1	201	186	216	0.790441	12	0.75	0.948837	0.819498	0.999703	25	0.8	1.01209	1	0.998033
GRIN2A	CCDS10539.1	202	187	217	0.783088	11	0.818182	1.04481	1	0.999703	24	0.833333	1.06416	0.869377	0.998067
GRIN2A	CCDS10539.1	203	188	218	0.789668	10	0.8	1.01308	1	0.999703	22	0.863636	1.09367	0.698084	0.9981
GRIN2A	CCDS10539.1	204	189	219	0.779412	10	0.8	1.02642	1	0.999703	22	0.863636	1.10806	0.552601	0.998067
GRIN2A	CCDS10539.1	205	190	220	0.785978	9	0.777778	0.989567	1	0.999506	19	0.894737	1.13837	0.505438	0.9981
GRIN2A	CCDS10539.1	206	191	221	0.792593	10	0.8	1.00935	1	0.999638	19	0.894737	1.12887	0.504733	0.9981
GRIN2A	CCDS10539.1	207	192	222	0.796296	11	0.727273	0.913319	0.599139	0.999703	20	0.85	1.06744	0.858568	0.9981
GRIN2A	CCDS10539.1	208	193	223	0.796296	11	0.636364	0.799154	0.371078	0.999703	21	0.809524	1.01661	1	0.998067
GRIN2A	CCDS10539.1	209	194	224	0.788889	11	0.636364	0.806658	0.38041	0.999703	20	0.8	1.01408	1	0.9981
GRIN2A	CCDS10539.1	210	195	225	0.781481	11	0.636364	0.814304	0.391842	0.999572	20	0.8	1.0237	1	0.998067
GRIN2A	CCDS10539.1	211	196	226	0.774074	11	0.636364	0.822097	0.405337	0.999506	19	0.789474	1.01989	1	0.998
GRIN2A	CCDS10539.1	212	197	227	0.777778	11	0.636364	0.818182	0.398554	0.999506	19	0.789474	1.01504	1	0.998
GRIN2A	CCDS10539.1	213	198	228	0.780669	11	0.727273	0.931602	0.813904	0.999473	19	0.842105	1.0787	0.858103	0.997867
GRIN2A	CCDS10539.1	214	199	229	0.771218	12	0.666667	0.864434	0.611538	0.999407	21	0.761905	0.987924	1	0.998
GRIN2A	CCDS10539.1	215	200	230	0.769517	12	0.666667	0.866345	0.612364	0.999473	20	0.75	0.974638	0.864889	0.998
GRIN2A	CCDS10539.1	216	201	231	0.764925	11	0.636364	0.831929	0.423267	0.99944	18	0.722222	0.944173	0.688602	0.998
GRIN2A	CCDS10539.1	217	202	232	0.758364	11	0.636364	0.839127	0.437819	0.999506	17	0.705882	0.930796	0.677614	0.998
GRIN2A	CCDS10539.1	218	203	233	0.757463	11	0.636364	0.840125	0.439748	0.999369	17	0.705882	0.931904	0.678329	0.998067
GRIN2A	CCDS10539.1	219	204	234	0.764925	13	0.615385	0.804503	0.318352	0.999407	17	0.647059	0.845911	0.357634	0.998167
GRIN2A	CCDS10539.1	220	205	235	0.76779	12	0.583333	0.759756	0.274538	0.999473	16	0.625	0.814024	0.331727	0.9983
GRIN2A	CCDS10539.1	221	206	236	0.76779	12	0.583333	0.759756	0.274538	0.999572	16	0.625	0.814024	0.331727	0.9983
GRIN2A	CCDS10539.1	222	207	237	0.771536	12	0.583333	0.756068	0.270102	0.99944	16	0.625	0.810073	0.32809	0.9983
GRIN2A	CCDS10539.1	223	208	238	0.764045	12	0.583333	0.76348	0.280107	0.999506	18	0.611111	0.799837	0.249615	0.9983
GRIN2A	CCDS10539.1	224	209	239	0.76779	11	0.545455	0.710421	0.249753	0.999572	17	0.588235	0.766141	0.159865	0.9983
GRIN2A	CCDS10539.1	225	210	240	0.764045	10	0.5	0.654412	0.141023	0.999703	16	0.5625	0.736213	0.139876	0.9983
GRIN2A	CCDS10539.1	226	211	241	0.764045	10	0.5	0.654412	0.141023	0.999506	16	0.5625	0.736213	0.139876	0.9983
GRIN2A	CCDS10539.1	227	212	242	0.764045	10	0.5	0.654412	0.141023	0.999506	15	0.533333	0.698039	0.119799	0.9981
GRIN2A	CCDS10539.1	228	213	243	0.756554	10	0.5	0.660891	0.153029	0.999506	14	0.5	0.660891	0.109861	0.9981
GRIN2A	CCDS10539.1	229	214	244	0.756554	11	0.545455	0.720972	0.258074	0.999506	16	0.5	0.660891	0.0803597	0.9981
GRIN2A	CCDS10539.1	230	215	245	0.75	14	0.5	0.666667	0.131262	0.999506	19	0.473684	0.631579	0.0413598	0.9981
GRIN2A	CCDS10539.1	231	216	246	0.75	15	0.533333	0.711111	0.151824	0.999506	20	0.5	0.666667	0.0493805	0.998033
GRIN2A	CCDS10539.1	232	217	247	0.743494	16	0.5	0.6725	0.105751	0.999506	21	0.47619	0.640476	0.0342866	0.998
GRIN2A	CCDS10539.1	233	218	248	0.743494	16	0.5	0.6725	0.105751	0.999473	22	0.454545	0.611364	0.0217313	0.998
GRIN2A	CCDS10539.1	234	219	249	0.737037	18	0.5	0.678392	0.0894042	0.99944	24	0.458333	0.621859	0.0188406	0.998
GRIN2A	CCDS10539.1	235	220	250	0.740741	19	0.473684	0.639474	0.0576711	0.999506	26	0.461538	0.623077	0.0141478	0.998
GRIN2A	CCDS10539.1	236	221	251	0.739777	19	0.473684	0.640307	0.0581435	0.999506	26	0.461538	0.623889	0.0143855	0.9978
GRIN2A	CCDS10539.1	237	222	252	0.740741	18	0.444444	0.6	0.049655	0.999506	25	0.44	0.594	0.0114351	0.9978
GRIN2A	CCDS10539.1	238	223	253	0.744444	18	0.5	0.671642	0.0821503	0.999407	25	0.48	0.644776	0.0208142	0.9978
GRIN2A	CCDS10539.1	239	224	254	0.744444	18	0.5	0.671642	0.0821503	0.999407	24	0.458333	0.615672	0.0168769	0.997733
GRIN2A	CCDS10539.1	240	225	255	0.753731	18	0.5	0.663366	0.0753877	0.999407	24	0.458333	0.608086	0.0152397	0.997633
GRIN2A	CCDS10539.1	241	226	256	0.757463	18	0.5	0.660099	0.0732295	0.999407	24	0.458333	0.60509	0.0100143	0.9975
GRIN2A	CCDS10539.1	242	227	257	0.757463	18	0.5	0.660099	0.0732295	0.999407	24	0.458333	0.60509	0.0100143	0.9975
GRIN2A	CCDS10539.1	243	228	258	0.753731	18	0.5	0.663366	0.0753877	0.999407	24	0.458333	0.608086	0.0152397	0.997567
GRIN2A	CCDS10539.1	244	229	259	0.758364	17	0.470588	0.620531	0.045109	0.999264	23	0.434783	0.573316	0.00690429	0.9975
GRIN2A	CCDS10539.1	245	230	260	0.761194	16	0.5	0.656863	0.0940676	0.999336	21	0.47619	0.625584	0.0290335	0.9974
GRIN2A	CCDS10539.1	246	231	261	0.755556	16	0.5	0.661765	0.0969808	0.999336	22	0.454545	0.601604	0.0130882	0.9975
GRIN2A	CCDS10539.1	247	232	262	0.749077	16	0.5	0.667488	0.101095	0.99916	22	0.454545	0.606807	0.0206073	0.997633
GRIN2A	CCDS10539.1	248	233	263	0.749077	15	0.466667	0.622989	0.0893946	0.999127	21	0.428571	0.572132	0.0107916	0.997633
GRIN2A	CCDS10539.1	249	234	264	0.75	15	0.466667	0.622222	0.0630487	0.999028	21	0.428571	0.571429	0.0105677	0.9977
GRIN2A	CCDS10539.1	250	235	265	0.742647	14	0.5	0.673267	0.13655	0.999193	21	0.428571	0.577086	0.0125904	0.9977
GRIN2A	CCDS10539.1	251	236	266	0.742647	14	0.5	0.673267	0.13655	0.999094	21	0.428571	0.577086	0.0125904	0.997733
GRIN2A	CCDS10539.1	252	237	267	0.742647	15	0.533333	0.718152	0.161661	0.999094	22	0.454545	0.612061	0.0219415	0.9978
GRIN2A	CCDS10539.1	253	238	268	0.746324	15	0.533333	0.714614	0.156459	0.999094	22	0.454545	0.609046	0.021104	0.997733
GRIN2A	CCDS10539.1	254	239	269	0.746324	16	0.5	0.669951	0.103476	0.999193	21	0.428571	0.574243	0.0115533	0.9977
GRIN2A	CCDS10539.1	255	240	270	0.749077	17	0.470588	0.628224	0.0686514	0.999193	22	0.409091	0.546126	0.00612971	0.9977
GRIN2A	CCDS10539.1	256	241	271	0.759259	17	0.470588	0.619799	0.0444423	0.999193	22	0.409091	0.538803	0.00461049	0.997767
GRIN2A	CCDS10539.1	257	242	272	0.759259	18	0.5	0.658537	0.0723673	0.999193	23	0.434783	0.572641	0.00676998	0.9978
GRIN2A	CCDS10539.1	258	243	273	0.752768	18	0.5	0.664216	0.0760122	0.999193	23	0.434783	0.577579	0.00793035	0.9978
GRIN2A	CCDS10539.1	259	244	274	0.751852	20	0.5	0.665025	0.0611253	0.999193	26	0.423077	0.562713	0.00388248	0.9978
GRIN2A	CCDS10539.1	260	245	275	0.750929	18	0.444444	0.591859	0.0309695	0.999193	23	0.391304	0.521093	0.00324612	0.9978
GRIN2A	CCDS10539.1	261	246	276	0.750929	17	0.470588	0.626674	0.0680142	0.999407	23	0.391304	0.521093	0.00324612	0.9978
GRIN2A	CCDS10539.1	262	247	277	0.754647	17	0.470588	0.623587	0.0478824	0.999407	23	0.391304	0.518526	0.00293424	0.9978
GRIN2A	CCDS10539.1	263	248	278	0.754647	16	0.5	0.662562	0.097616	0.999407	22	0.409091	0.542096	0.00523689	0.9977
GRIN2A	CCDS10539.1	264	249	279	0.754647	17	0.470588	0.623587	0.0478824	0.999407	24	0.416667	0.552135	0.00431162	0.9977
GRIN2A	CCDS10539.1	265	250	280	0.754647	15	0.466667	0.618391	0.0586612	0.999127	22	0.409091	0.542096	0.00523689	0.997733
GRIN2A	CCDS10539.1	266	251	281	0.7603	15	0.466667	0.613793	0.0538573	0.99916	21	0.380952	0.501056	0.00300556	0.9978
GRIN2A	CCDS10539.1	267	252	282	0.762082	15	0.466667	0.612358	0.0526629	0.999127	21	0.380952	0.499884	0.0028745	0.9978
GRIN2A	CCDS10539.1	268	253	283	0.762082	15	0.466667	0.612358	0.0526629	0.999094	21	0.380952	0.499884	0.0028745	0.9978
GRIN2A	CCDS10539.1	269	254	284	0.764045	14	0.428571	0.560924	0.0373377	0.999264	20	0.35	0.458088	0.0017915	0.9978
GRIN2A	CCDS10539.1	270	255	285	0.764045	13	0.461538	0.604072	0.0640954	0.999407	19	0.368421	0.482198	0.00324612	0.9978
GRIN2A	CCDS10539.1	271	256	286	0.7603	13	0.461538	0.607048	0.0674688	0.999407	19	0.368421	0.484574	0.0036099	0.9978
GRIN2A	CCDS10539.1	272	257	287	0.764045	13	0.461538	0.604072	0.0640954	0.999407	19	0.368421	0.482198	0.00324612	0.9978
GRIN2A	CCDS10539.1	273	258	288	0.7603	13	0.461538	0.607048	0.0674688	0.999264	19	0.368421	0.484574	0.0036099	0.997733
GRIN2A	CCDS10539.1	274	259	289	0.766917	14	0.5	0.651961	0.0809797	0.999127	20	0.4	0.521569	0.00460736	0.997633
GRIN2A	CCDS10539.1	275	260	290	0.759398	15	0.533333	0.70231	0.14113	0.999094	22	0.409091	0.538704	0.00459471	0.9975
GRIN2A	CCDS10539.1	276	261	291	0.759398	15	0.533333	0.70231	0.14113	0.999094	23	0.391304	0.515282	0.00258112	0.9975
GRIN2A	CCDS10539.1	277	262	292	0.759398	15	0.533333	0.70231	0.14113	0.999127	22	0.409091	0.538704	0.00459471	0.997567
GRIN2A	CCDS10539.1	278	263	293	0.763158	15	0.533333	0.698851	0.137879	0.999193	22	0.409091	0.53605	0.0041417	0.997633
GRIN2A	CCDS10539.1	279	264	294	0.770677	16	0.5	0.64878	0.0607912	0.999127	23	0.391304	0.507741	0.00188086	0.997567
GRIN2A	CCDS10539.1	280	265	295	0.763158	17	0.529412	0.693712	0.105227	0.999127	24	0.416667	0.545977	0.00334948	0.9977
GRIN2A	CCDS10539.1	281	266	296	0.766917	16	0.5	0.651961	0.064627	0.999127	22	0.409091	0.533422	0.0037342	0.9977
GRIN2A	CCDS10539.1	282	267	297	0.7603	18	0.555556	0.730706	0.12606	0.999061	24	0.458333	0.602833	0.00918411	0.9977
GRIN2A	CCDS10539.1	283	268	298	0.764045	17	0.529412	0.692907	0.10455	0.999193	24	0.458333	0.599877	0.00824335	0.9977
GRIN2A	CCDS10539.1	284	269	299	0.756554	17	0.529412	0.699767	0.111191	0.999264	24	0.458333	0.605817	0.0102476	0.997633
GRIN2A	CCDS10539.1	285	270	300	0.756554	18	0.555556	0.734323	0.131237	0.999193	26	0.461538	0.610053	0.0112819	0.9977
GRIN2A	CCDS10539.1	286	271	301	0.75	18	0.555556	0.740741	0.190205	0.99916	27	0.444444	0.592593	0.00786022	0.9975
GRIN2A	CCDS10539.1	287	272	302	0.743494	18	0.555556	0.747222	0.195107	0.999193	28	0.464286	0.624464	0.010743	0.997567
GRIN2A	CCDS10539.1	288	273	303	0.736059	17	0.529412	0.719251	0.185408	0.99916	27	0.444444	0.603816	0.00972045	0.997467
GRIN2A	CCDS10539.1	289	274	304	0.736059	17	0.588235	0.799168	0.285448	0.999094	27	0.481481	0.654134	0.0270363	0.9974
GRIN2A	CCDS10539.1	290	275	305	0.737037	15	0.6	0.81407	0.364244	0.999061	25	0.52	0.705528	0.0569818	0.997267
GRIN2A	CCDS10539.1	291	276	306	0.749077	17	0.647059	0.863808	0.523966	0.999193	27	0.555556	0.741653	0.0660778	0.9972
GRIN2A	CCDS10539.1	292	277	307	0.745387	15	0.666667	0.894389	0.673381	0.999127	25	0.56	0.751287	0.0885997	0.9972
GRIN2A	CCDS10539.1	293	278	308	0.748148	15	0.666667	0.891089	0.671862	0.999127	25	0.56	0.748515	0.0853477	0.996867
GRIN2A	CCDS10539.1	294	279	309	0.754647	16	0.6875	0.911022	0.681793	0.99916	27	0.555556	0.73618	0.0612503	0.9967
GRIN2A	CCDS10539.1	295	280	310	0.762082	15	0.733333	0.962276	0.846124	0.999094	25	0.56	0.734829	0.0736158	0.9967
GRIN2A	CCDS10539.1	296	281	311	0.762082	17	0.705882	0.926255	0.691759	0.999028	27	0.555556	0.728997	0.0566722	0.9967
GRIN2A	CCDS10539.1	297	282	312	0.762082	17	0.705882	0.926255	0.691759	0.998896	26	0.576923	0.757036	0.0828913	0.996667
GRIN2A	CCDS10539.1	298	283	313	0.758364	18	0.666667	0.879085	0.531035	0.999028	27	0.555556	0.732571	0.0587278	0.996633
GRIN2A	CCDS10539.1	299	284	314	0.750929	19	0.631579	0.841063	0.408115	0.998896	29	0.517241	0.688802	0.0299638	0.996567
GRIN2A	CCDS10539.1	300	285	315	0.748148	20	0.65	0.868812	0.434095	0.998896	30	0.533333	0.712871	0.036117	0.9964
GRIN2A	CCDS10539.1	301	286	316	0.740741	20	0.65	0.8775	0.565957	0.998896	31	0.548387	0.740323	0.0589768	0.9966
GRIN2A	CCDS10539.1	302	287	317	0.741697	21	0.666667	0.898839	0.579187	0.998797	32	0.5625	0.758396	0.0656568	0.9966
GRIN2A	CCDS10539.1	303	288	318	0.734317	21	0.666667	0.907873	0.589247	0.998534	32	0.5625	0.766018	0.0929504	0.996633
GRIN2A	CCDS10539.1	304	289	319	0.745387	23	0.695652	0.933276	0.74402	0.998303	34	0.588235	0.789167	0.100252	0.9966
GRIN2A	CCDS10539.1	305	290	320	0.745387	22	0.681818	0.914716	0.592969	0.998468	33	0.575758	0.772427	0.0931991	0.9966
GRIN2A	CCDS10539.1	306	291	321	0.750929	22	0.636364	0.847435	0.341063	0.998369	33	0.575758	0.766727	0.0657234	0.996733
GRIN2A	CCDS10539.1	307	292	322	0.748148	23	0.652174	0.871718	0.4635	0.998402	34	0.588235	0.786255	0.0979363	0.9969
GRIN2A	CCDS10539.1	308	293	323	0.754647	23	0.652174	0.864211	0.457716	0.998468	34	0.588235	0.779484	0.0705622	0.9969
GRIN2A	CCDS10539.1	309	294	324	0.762082	23	0.652174	0.855779	0.343705	0.9986	35	0.6	0.787317	0.0713646	0.996833
GRIN2A	CCDS10539.1	310	295	325	0.761194	22	0.681818	0.895722	0.574686	0.998435	35	0.6	0.788235	0.095824	0.9967
GRIN2A	CCDS10539.1	311	296	326	0.764925	21	0.666667	0.871545	0.42921	0.998402	34	0.588235	0.76901	0.0617146	0.996767
GRIN2A	CCDS10539.1	312	297	327	0.761194	21	0.666667	0.875817	0.435467	0.998336	36	0.611111	0.802832	0.102007	0.996633
GRIN2A	CCDS10539.1	313	298	328	0.76779	19	0.631579	0.822593	0.286222	0.998073	35	0.6	0.781463	0.0657927	0.9966
GRIN2A	CCDS10539.1	314	299	329	0.764045	20	0.65	0.850735	0.411701	0.998303	35	0.6	0.785294	0.0691685	0.9967
GRIN2A	CCDS10539.1	315	300	330	0.76779	24	0.625	0.814024	0.249278	0.998336	37	0.594595	0.774423	0.0519507	0.997
GRIN2A	CCDS10539.1	316	301	331	0.779026	22	0.636364	0.816871	0.224728	0.998402	34	0.617647	0.792845	0.0820628	0.997
GRIN2A	CCDS10539.1	317	302	332	0.786517	21	0.666667	0.847619	0.299082	0.998534	32	0.65625	0.834375	0.153462	0.997
GRIN2A	CCDS10539.1	318	303	333	0.786517	24	0.666667	0.847619	0.326913	0.998534	34	0.647059	0.822689	0.116689	0.9969
GRIN2A	CCDS10539.1	319	304	334	0.789474	24	0.666667	0.844444	0.245263	0.998303	34	0.647059	0.819608	0.11316	0.996967
GRIN2A	CCDS10539.1	320	305	335	0.796992	24	0.666667	0.836478	0.230736	0.998237	33	0.636364	0.798456	0.0711711	0.997
GRIN2A	CCDS10539.1	321	306	336	0.796992	27	0.703704	0.882949	0.354349	0.998237	36	0.638889	0.801625	0.0807003	0.997267
GRIN2A	CCDS10539.1	322	307	337	0.793233	25	0.68	0.857251	0.331677	0.997935	34	0.617647	0.778645	0.0513744	0.997267
GRIN2A	CCDS10539.1	323	308	338	0.808271	25	0.68	0.841302	0.226804	0.99776	33	0.636364	0.787315	0.0611681	0.9972
GRIN2A	CCDS10539.1	324	309	339	0.801498	24	0.666667	0.831776	0.222607	0.997727	32	0.625	0.77979	0.0607161	0.9971
GRIN2A	CCDS10539.1	325	310	340	0.802239	24	0.666667	0.831008	0.2214	0.997562	32	0.65625	0.818023	0.0983316	0.996833
GRIN2A	CCDS10539.1	326	311	341	0.794776	24	0.666667	0.838811	0.235253	0.997628	31	0.677419	0.85234	0.199697	0.996567
GRIN2A	CCDS10539.1	327	312	342	0.794776	22	0.681818	0.857875	0.305337	0.99743	29	0.689655	0.867735	0.258011	0.996333
GRIN2A	CCDS10539.1	328	313	343	0.798507	22	0.727273	0.91079	0.547316	0.9972	31	0.709677	0.888755	0.36065	0.9961
GRIN2A	CCDS10539.1	329	314	344	0.802239	22	0.772727	0.963214	0.866949	0.996969	31	0.741935	0.924831	0.479242	0.996133
GRIN2A	CCDS10539.1	330	315	345	0.802239	21	0.809524	1.00908	1	0.996837	29	0.793103	0.988613	0.878024	0.9961
GRIN2A	CCDS10539.1	331	316	346	0.802239	21	0.761905	0.949723	0.705409	0.996903	29	0.758621	0.94563	0.597756	0.996167
GRIN2A	CCDS10539.1	332	317	347	0.809701	21	0.761905	0.94097	0.695889	0.99664	29	0.724138	0.894327	0.339896	0.995833
GRIN2A	CCDS10539.1	333	318	348	0.805243	20	0.75	0.931395	0.689117	0.996431	29	0.689655	0.856455	0.243617	0.995267
GRIN2A	CCDS10539.1	334	319	349	0.805243	20	0.75	0.931395	0.689117	0.995931	29	0.689655	0.856455	0.243617	0.995167
GRIN2A	CCDS10539.1	335	320	350	0.805243	18	0.722222	0.896899	0.500197	0.995497	27	0.666667	0.827907	0.156439	0.9945
GRIN2A	CCDS10539.1	336	321	351	0.798507	18	0.722222	0.904465	0.51274	0.996634	27	0.666667	0.834891	0.168675	0.995533
GRIN2A	CCDS10539.1	337	322	352	0.799257	17	0.764706	0.956772	0.843495	0.999094	25	0.68	0.850791	0.224436	0.998667
GRIN2A	CCDS10539.1	338	323	353	0.80597	17	0.764706	0.948802	0.84055	0.999193	24	0.708333	0.878858	0.400549	0.998833
GRIN2A	CCDS10539.1	339	324	354	0.799257	17	0.764706	0.956772	0.843495	0.999401	25	0.72	0.900837	0.424859	0.998967
GRIN2A	CCDS10539.1	340	325	355	0.794007	17	0.764706	0.963097	0.845973	0.999506	24	0.708333	0.892099	0.416512	0.998967
GRIN2A	CCDS10539.1	341	326	356	0.794007	17	0.764706	0.963097	0.845973	0.999473	24	0.75	0.944575	0.70952	0.999033
GRIN2A	CCDS10539.1	342	327	357	0.790262	17	0.764706	0.967661	0.84837	0.999407	25	0.76	0.961706	0.723391	0.9991
GRIN2A	CCDS10539.1	343	328	358	0.797753	18	0.777778	0.974961	0.852549	0.999506	25	0.76	0.952676	0.715265	0.9991
GRIN2A	CCDS10539.1	344	329	359	0.791045	18	0.777778	0.983229	0.858238	0.999506	24	0.75	0.948113	0.71186	0.999167
GRIN2A	CCDS10539.1	345	330	360	0.794776	17	0.764706	0.962165	0.84556	0.999506	23	0.73913	0.929986	0.555114	0.9994
GRIN2A	CCDS10539.1	346	331	361	0.791045	13	0.846154	1.06967	1	0.999506	21	0.761905	0.963163	0.861555	0.9994
GRIN2A	CCDS10539.1	347	332	362	0.779851	14	0.857143	1.09911	0.834324	0.999736	22	0.772727	0.990866	1	0.999433
GRIN2A	CCDS10539.1	348	333	363	0.772388	14	0.857143	1.10973	0.835162	0.999802	22	0.772727	1.00044	1	0.999567
GRIN2A	CCDS10539.1	349	334	364	0.776119	11	0.909091	1.17133	0.597423	0.999736	19	0.789474	1.01721	1	0.9997
GRIN2A	CCDS10539.1	350	335	365	0.773234	12	0.916667	1.1855	0.446852	0.999703	21	0.761905	0.985348	0.867231	0.999567
GRIN2A	CCDS10539.1	351	336	366	0.762082	12	0.833333	1.0935	0.831353	0.999703	22	0.727273	0.954324	0.720119	0.9995
GRIN2A	CCDS10539.1	352	337	367	0.769517	10	0.8	1.03961	1	0.999769	19	0.736842	0.957539	0.859955	0.999633
GRIN2A	CCDS10539.1	353	338	368	0.768657	10	0.8	1.04078	1	0.999802	19	0.736842	0.95861	0.859974	0.9997
GRIN2A	CCDS10539.1	354	339	369	0.764925	11	0.818182	1.06962	1	0.999802	21	0.714286	0.933798	0.704611	0.9997
GRIN2A	CCDS10539.1	355	340	370	0.761194	12	0.833333	1.09477	0.831353	0.999769	22	0.727273	0.955437	0.868259	0.9997
GRIN2A	CCDS10539.1	356	341	371	0.7603	11	0.818182	1.07613	1	0.999802	20	0.7	0.92069	0.697436	0.9997
GRIN2A	CCDS10539.1	357	342	372	0.769811	11	0.818182	1.06283	1	0.999802	20	0.7	0.909314	0.538335	0.9997
GRIN2A	CCDS10539.1	358	343	373	0.776515	12	0.75	0.965854	0.827353	0.999769	21	0.666667	0.858537	0.393585	0.9997
GRIN2A	CCDS10539.1	359	344	374	0.773585	11	0.727273	0.940133	0.816698	0.999802	19	0.631579	0.816431	0.256219	0.9997
GRIN2A	CCDS10539.1	360	345	375	0.766038	11	0.727273	0.949395	0.820946	0.999868	19	0.631579	0.824475	0.26736	0.999767
GRIN2A	CCDS10539.1	361	346	376	0.766038	11	0.727273	0.949395	0.820946	0.999802	19	0.631579	0.824475	0.26736	0.9998
GRIN2A	CCDS10539.1	362	347	377	0.766038	10	0.8	1.04433	1	0.999736	18	0.666667	0.870279	0.506257	0.9998
GRIN2A	CCDS10539.1	363	348	378	0.768061	10	0.8	1.04158	1	0.999769	17	0.705882	0.919045	0.667267	0.9997
GRIN2A	CCDS10539.1	364	349	379	0.772727	10	0.8	1.03529	1	0.999769	16	0.75	0.970588	0.850914	0.9997
GRIN2A	CCDS10539.1	365	350	380	0.780303	10	0.8	1.02524	1	0.999802	16	0.75	0.961165	0.846705	0.999567
GRIN2A	CCDS10539.1	366	351	381	0.780303	13	0.769231	0.98581	1	0.999802	19	0.736842	0.944303	0.685905	0.9995
GRIN2A	CCDS10539.1	367	352	382	0.780303	15	0.666667	0.854369	0.473658	0.999802	22	0.727273	0.932039	0.703101	0.999633
GRIN2A	CCDS10539.1	368	353	383	0.769811	15	0.666667	0.866013	0.485618	0.999769	22	0.727273	0.944742	0.711006	0.9997
GRIN2A	CCDS10539.1	369	354	384	0.770677	14	0.642857	0.834146	0.463771	0.999703	22	0.681818	0.884701	0.419385	0.9997
GRIN2A	CCDS10539.1	370	355	385	0.766917	15	0.6	0.782353	0.238341	0.999638	22	0.636364	0.829768	0.298866	0.9997
GRIN2A	CCDS10539.1	371	356	386	0.764925	15	0.6	0.78439	0.241711	0.999638	22	0.636364	0.831929	0.300633	0.9997
GRIN2A	CCDS10539.1	372	357	387	0.765799	16	0.5625	0.734527	0.155495	0.999473	23	0.608696	0.79485	0.155993	0.999567
GRIN2A	CCDS10539.1	373	358	388	0.765799	18	0.5	0.652913	0.0699746	0.999506	24	0.583333	0.761731	0.104727	0.9995
GRIN2A	CCDS10539.1	374	359	389	0.758364	17	0.470588	0.620531	0.045109	0.999506	22	0.545455	0.719251	0.0650868	0.9995
GRIN2A	CCDS10539.1	375	360	390	0.76779	17	0.470588	0.612912	0.0382143	0.999572	22	0.545455	0.710421	0.05678	0.998
GRIN2A	CCDS10539.1	376	361	391	0.764045	17	0.470588	0.615917	0.0407784	0.999703	22	0.545455	0.713904	0.05971	0.998033
GRIN2A	CCDS10539.1	377	362	392	0.771536	17	0.470588	0.609937	0.0358105	0.999703	22	0.545455	0.706973	0.0538058	0.9981
GRIN2A	CCDS10539.1	378	363	393	0.777358	16	0.4375	0.562803	0.023091	0.999506	21	0.52381	0.673833	0.0434433	0.998167
GRIN2A	CCDS10539.1	379	364	394	0.784091	16	0.4375	0.557971	0.020773	0.999506	21	0.52381	0.668047	0.0277945	0.998233
GRIN2A	CCDS10539.1	380	365	395	0.780303	16	0.4375	0.56068	0.0221638	0.999473	21	0.52381	0.67129	0.0425286	0.9983
GRIN2A	CCDS10539.1	381	366	396	0.787879	15	0.4	0.507692	0.0143256	0.999407	19	0.526316	0.668016	0.0344081	0.9983
GRIN2A	CCDS10539.1	382	367	397	0.791667	14	0.428571	0.541353	0.0226715	0.99944	19	0.526316	0.66482	0.0316548	0.9983
GRIN2A	CCDS10539.1	383	368	398	0.791667	13	0.384615	0.48583	0.0164536	0.999506	18	0.5	0.631579	0.0233293	0.9983
GRIN2A	CCDS10539.1	384	369	399	0.791667	13	0.384615	0.48583	0.0164536	0.999506	18	0.5	0.631579	0.0233293	0.9983
GRIN2A	CCDS10539.1	385	370	400	0.790875	13	0.384615	0.486317	0.0165494	0.999506	17	0.529412	0.6694	0.0438435	0.9983
GRIN2A	CCDS10539.1	386	371	401	0.794677	15	0.333333	0.419458	0.00451462	0.999506	19	0.473684	0.596072	0.0116255	0.9983
GRIN2A	CCDS10539.1	387	372	402	0.795455	15	0.333333	0.419048	0.00443531	0.999506	19	0.473684	0.595489	0.0113903	0.9983
GRIN2A	CCDS10539.1	388	373	403	0.793233	15	0.333333	0.420221	0.0046273	0.999572	19	0.473684	0.597156	0.0120042	0.9983
GRIN2A	CCDS10539.1	389	374	404	0.794007	14	0.357143	0.449798	0.00872261	0.999769	18	0.5	0.629717	0.0221366	0.998367
GRIN2A	CCDS10539.1	390	375	405	0.794776	14	0.357143	0.449363	0.00857363	0.999802	18	0.5	0.629108	0.0217365	0.9984
GRIN2A	CCDS10539.1	391	376	406	0.794776	14	0.357143	0.449363	0.00857363	0.999802	17	0.470588	0.592102	0.015786	0.9984
GRIN2A	CCDS10539.1	392	377	407	0.802239	14	0.357143	0.445183	0.00722678	0.999802	17	0.470588	0.586594	0.0132084	0.9984
GRIN2A	CCDS10539.1	393	378	408	0.799257	15	0.333333	0.417054	0.00404693	0.999802	18	0.444444	0.556072	0.007115	0.9984
GRIN2A	CCDS10539.1	394	379	409	0.789668	15	0.333333	0.422118	0.00497757	0.999802	18	0.444444	0.562825	0.00915842	0.9984
GRIN2A	CCDS10539.1	395	380	410	0.783088	15	0.333333	0.425665	0.0057112	0.999802	18	0.444444	0.567553	0.0108868	0.9984
GRIN2A	CCDS10539.1	396	381	411	0.772059	16	0.3125	0.404762	0.0040503	0.999802	19	0.421053	0.545363	0.00747333	0.998367
GRIN2A	CCDS10539.1	397	382	412	0.771218	14	0.214286	0.277854	0.00141647	0.999802	17	0.352941	0.457641	0.00325569	0.9983
GRIN2A	CCDS10539.1	398	383	413	0.777778	12	0.25	0.321429	0.00458119	0.999802	14	0.285714	0.367347	0.0020318	0.998367
GRIN2A	CCDS10539.1	399	384	414	0.781481	13	0.230769	0.295297	0.00221626	0.999802	15	0.266667	0.341232	0.000955245	0.998467
GRIN2A	CCDS10539.1	400	385	415	0.774074	14	0.214286	0.276828	0.00138031	0.999802	14	0.285714	0.369105	0.0022215	0.998533
GRIN2A	CCDS10539.1	401	386	416	0.785185	13	0.230769	0.293904	0.00205933	0.999802	13	0.307692	0.391872	0.00341213	0.998733
GRIN2A	CCDS10539.1	402	387	417	0.781481	15	0.2	0.255924	0.00047755	0.999802	16	0.3125	0.399882	0.00154714	0.998867
GRIN2A	CCDS10539.1	403	388	418	0.777778	15	0.2	0.257143	0.000555184	0.999802	16	0.25	0.321429	0.0004876	0.9989
GRIN2A	CCDS10539.1	404	389	419	0.777778	13	0.230769	0.296703	0.00229032	0.999802	14	0.214286	0.27551	0.000524177	0.9989
GRIN2A	CCDS10539.1	405	390	420	0.784387	13	0.230769	0.294203	0.00210017	0.999802	14	0.214286	0.273189	0.000440394	0.998833
GRIN2A	CCDS10539.1	406	391	421	0.782288	14	0.214286	0.273922	0.00115321	0.999802	15	0.2	0.25566	0.000236486	0.998867
GRIN2A	CCDS10539.1	407	392	422	0.785978	15	0.2	0.25446	0.00044725	0.999868	17	0.235294	0.299365	0.000202882	0.9989
GRIN2A	CCDS10539.1	408	393	423	0.789668	17	0.235294	0.297966	0.000405699	1	19	0.263158	0.333251	0.000183177	0.9989
GRIN2A	CCDS10539.1	409	394	424	0.783883	19	0.315789	0.402853	0.00141647	0.999868	22	0.363636	0.463891	0.000859101	0.9989
GRIN2A	CCDS10539.1	410	395	425	0.773723	21	0.333333	0.430818	0.00158852	0.999934	23	0.347826	0.449549	0.000603909	0.999033
GRIN2A	CCDS10539.1	411	396	426	0.773723	22	0.318182	0.411235	0.000894609	0.999934	24	0.333333	0.430818	0.000330487	0.9991
GRIN2A	CCDS10539.1	412	397	427	0.772894	23	0.347826	0.450031	0.00141647	1	25	0.36	0.465782	0.000524177	0.9991
GRIN2A	CCDS10539.1	413	398	428	0.772894	25	0.32	0.414028	0.000409352	0.999934	25	0.36	0.465782	0.000524177	0.9991
GRIN2A	CCDS10539.1	414	399	429	0.772059	25	0.32	0.414476	0.000409352	0.999934	25	0.36	0.466286	0.000534585	0.999167
GRIN2A	CCDS10539.1	415	400	430	0.765568	25	0.32	0.41799	0.000492708	0.999934	26	0.346154	0.452153	0.000376554	0.9992
GRIN2A	CCDS10539.1	416	401	431	0.762774	25	0.28	0.367081	0.000252305	0.999802	27	0.333333	0.437002	0.000237098	0.9994
GRIN2A	CCDS10539.1	417	402	432	0.770073	23	0.26087	0.33876	0.000252305	0.999802	26	0.346154	0.449508	0.000320214	0.9995
GRIN2A	CCDS10539.1	418	403	433	0.762774	24	0.25	0.327751	0.000252305	0.999802	27	0.333333	0.437002	0.000237098	0.9995
GRIN2A	CCDS10539.1	419	404	434	0.755474	24	0.25	0.330918	0.000252305	0.999802	27	0.333333	0.441224	0.000305257	0.9995
GRIN2A	CCDS10539.1	420	405	435	0.748175	24	0.25	0.334146	0.000252305	0.999802	27	0.333333	0.445528	0.000383997	0.9995
GRIN2A	CCDS10539.1	421	406	436	0.747253	24	0.25	0.334559	0.000252305	0.999802	27	0.333333	0.446078	0.000398791	0.9995
GRIN2A	CCDS10539.1	422	407	437	0.74359	24	0.25	0.336207	0.000252305	0.999802	28	0.357143	0.480296	0.000683771	0.9995
GRIN2A	CCDS10539.1	423	408	438	0.742647	26	0.307692	0.414318	0.000645797	0.999802	30	0.366667	0.493729	0.000611931	0.9995
GRIN2A	CCDS10539.1	424	409	439	0.746324	27	0.333333	0.446634	0.000954068	0.999802	31	0.387097	0.518672	0.000849691	0.9995
GRIN2A	CCDS10539.1	425	410	440	0.746324	30	0.4	0.535961	0.00270836	0.999802	34	0.441176	0.591133	0.00266455	0.9995
GRIN2A	CCDS10539.1	426	411	441	0.752768	31	0.419355	0.557084	0.00305302	0.999802	35	0.457143	0.607283	0.0028745	0.9995
GRIN2A	CCDS10539.1	427	412	442	0.760148	30	0.433333	0.570065	0.00421811	0.999769	34	0.470588	0.619075	0.00379016	0.999533
GRIN2A	CCDS10539.1	428	413	443	0.761029	29	0.448276	0.589039	0.0064437	0.999802	33	0.484848	0.637096	0.00578889	0.9998
GRIN2A	CCDS10539.1	429	414	444	0.761905	30	0.466667	0.6125	0.0109981	0.999802	34	0.5	0.65625	0.00702651	0.9998
GRIN2A	CCDS10539.1	430	415	445	0.760148	29	0.482759	0.635085	0.0157495	0.999769	33	0.515152	0.677699	0.016181	0.9998
GRIN2A	CCDS10539.1	431	416	446	0.760148	28	0.5	0.657767	0.0221638	0.999901	33	0.515152	0.677699	0.016181	0.9998
GRIN2A	CCDS10539.1	432	417	447	0.760148	29	0.517241	0.680449	0.0265789	0.999802	35	0.542857	0.714147	0.0209403	0.9997
GRIN2A	CCDS10539.1	433	418	448	0.766667	28	0.571429	0.745342	0.073938	0.999802	33	0.575758	0.750988	0.0419711	0.999767
GRIN2A	CCDS10539.1	434	419	449	0.762963	27	0.592593	0.776699	0.146214	0.999802	33	0.636364	0.834069	0.176436	0.9998
GRIN2A	CCDS10539.1	435	420	450	0.774074	27	0.592593	0.76555	0.0977285	0.999769	33	0.636364	0.822097	0.124293	0.999767
GRIN2A	CCDS10539.1	436	421	451	0.774908	28	0.607143	0.783503	0.107768	0.999802	34	0.647059	0.835014	0.172167	0.999567
GRIN2A	CCDS10539.1	437	422	452	0.767528	28	0.642857	0.837569	0.223655	0.999736	34	0.676471	0.881363	0.32298	0.999567
GRIN2A	CCDS10539.1	438	423	453	0.77037	27	0.666667	0.865385	0.369422	0.999703	32	0.6875	0.892428	0.395096	0.9997
GRIN2A	CCDS10539.1	439	424	454	0.769517	25	0.68	0.883671	0.468214	0.999703	30	0.7	0.909662	0.49288	0.9997
GRIN2A	CCDS10539.1	440	425	455	0.776119	23	0.652174	0.840301	0.324662	0.999703	27	0.666667	0.858974	0.260127	0.999567
GRIN2A	CCDS10539.1	441	426	456	0.786517	21	0.666667	0.847619	0.299082	0.999703	26	0.692308	0.88022	0.336681	0.999433
GRIN2A	CCDS10539.1	442	427	457	0.793233	20	0.7	0.882464	0.400675	0.999736	26	0.730769	0.921254	0.572425	0.9992
GRIN2A	CCDS10539.1	443	428	458	0.786517	20	0.65	0.826429	0.277694	0.997968	27	0.666667	0.847619	0.244468	0.998467
GRIN2A	CCDS10539.1	444	429	459	0.794007	19	0.736842	0.928004	0.688281	0.994926	27	0.703704	0.886268	0.339715	0.9972
GRIN2A	CCDS10539.1	445	430	460	0.794007	19	0.736842	0.928004	0.688281	0.995871	28	0.678571	0.854616	0.246279	0.9972
GRIN2A	CCDS10539.1	446	431	461	0.797753	19	0.736842	0.923647	0.68511	0.996837	27	0.703704	0.882107	0.33221	0.9974
GRIN2A	CCDS10539.1	447	432	462	0.801498	19	0.789474	0.984998	0.859639	0.997134	26	0.730769	0.911754	0.439491	0.9975
GRIN2A	CCDS10539.1	448	433	463	0.797753	19	0.842105	1.0556	0.860639	0.997331	25	0.76	0.952676	0.715265	0.997667
GRIN2A	CCDS10539.1	449	434	464	0.794007	18	0.888889	1.1195	0.677869	0.998303	24	0.791667	0.997052	1	0.9978
GRIN2A	CCDS10539.1	450	435	465	0.800752	18	0.888889	1.11007	0.67514	0.998797	24	0.791667	0.988654	0.868862	0.998
GRIN2A	CCDS10539.1	451	436	466	0.807547	18	0.888889	1.10073	0.674231	0.998896	24	0.791667	0.980335	0.86606	0.998
GRIN2A	CCDS10539.1	452	437	467	0.800752	18	0.888889	1.11007	0.67514	0.998962	24	0.791667	0.988654	0.868862	0.998233
GRIN2A	CCDS10539.1	453	438	468	0.804511	17	0.882353	1.09676	0.673381	0.999094	24	0.75	0.932243	0.554126	0.998367
GRIN2A	CCDS10539.1	454	439	469	0.800752	15	0.866667	1.08232	0.835469	0.999193	22	0.772727	0.965002	0.862024	0.9984
GRIN2A	CCDS10539.1	455	440	470	0.793233	15	0.866667	1.09258	0.835817	0.999193	22	0.772727	0.974149	0.864889	0.9984
GRIN2A	CCDS10539.1	456	441	471	0.793233	13	0.846154	1.06672	1	0.999193	20	0.75	0.945498	0.684919	0.9986
GRIN2A	CCDS10539.1	457	442	472	0.793233	12	0.833333	1.05055	1	0.99916	19	0.736842	0.92891	0.670467	0.998667
GRIN2A	CCDS10539.1	458	443	473	0.796992	12	0.833333	1.0456	1	0.999193	19	0.736842	0.924528	0.667328	0.9988
GRIN2A	CCDS10539.1	459	444	474	0.789474	12	0.833333	1.05556	1	0.999193	19	0.736842	0.933333	0.674624	0.9989
GRIN2A	CCDS10539.1	460	445	475	0.787879	12	0.75	0.951923	0.820928	0.999264	19	0.684211	0.868421	0.36748	0.999167
GRIN2A	CCDS10539.1	461	446	476	0.796992	13	0.692308	0.86865	0.440777	0.999407	21	0.666667	0.836478	0.259459	0.999433
GRIN2A	CCDS10539.1	462	447	477	0.796992	14	0.642857	0.806604	0.290702	0.999407	23	0.608696	0.763741	0.0811779	0.999467
GRIN2A	CCDS10539.1	463	448	478	0.795455	13	0.615385	0.773626	0.266541	0.999407	22	0.590909	0.742857	0.0716582	0.9995
GRIN2A	CCDS10539.1	464	449	479	0.784906	13	0.538462	0.686021	0.108201	0.999407	22	0.545455	0.69493	0.0457183	0.9995
GRIN2A	CCDS10539.1	465	450	480	0.784906	13	0.538462	0.686021	0.108201	0.999407	21	0.47619	0.606685	0.0110962	0.9995
GRIN2A	CCDS10539.1	466	451	481	0.773585	14	0.571429	0.738676	0.198354	0.999407	22	0.5	0.646341	0.020076	0.999467
GRIN2A	CCDS10539.1	467	452	482	0.773585	15	0.533333	0.689431	0.130905	0.999264	23	0.478261	0.61824	0.0114675	0.999333
GRIN2A	CCDS10539.1	468	453	483	0.773585	14	0.5	0.646341	0.0735328	0.999264	23	0.434783	0.562036	0.00446842	0.999467
GRIN2A	CCDS10539.1	469	454	484	0.773585	14	0.5	0.646341	0.0735328	0.999407	23	0.434783	0.562036	0.00446842	0.9995
GRIN2A	CCDS10539.1	470	455	485	0.774436	15	0.466667	0.602589	0.0432086	0.999407	24	0.416667	0.538026	0.00244831	0.9995
GRIN2A	CCDS10539.1	471	456	486	0.76779	16	0.4375	0.569817	0.0277255	0.999407	25	0.4	0.520976	0.00166564	0.999467
GRIN2A	CCDS10539.1	472	457	487	0.76779	16	0.4375	0.569817	0.0277255	0.999407	25	0.4	0.520976	0.00166564	0.9994
GRIN2A	CCDS10539.1	473	458	488	0.76779	16	0.4375	0.569817	0.0277255	0.999407	24	0.375	0.488415	0.00119194	0.9995
GRIN2A	CCDS10539.1	474	459	489	0.76779	15	0.466667	0.607805	0.0479974	0.999193	22	0.409091	0.532816	0.00364956	0.9995
GRIN2A	CCDS10539.1	475	460	490	0.76779	14	0.428571	0.558188	0.0351581	0.999193	22	0.363636	0.473614	0.00135642	0.9995
GRIN2A	CCDS10539.1	476	461	491	0.768657	14	0.428571	0.557559	0.0347703	0.999407	22	0.409091	0.532215	0.00355603	0.9994
GRIN2A	CCDS10539.1	477	462	492	0.764925	14	0.428571	0.560279	0.0367943	0.999407	22	0.409091	0.534812	0.00397283	0.9992
GRIN2A	CCDS10539.1	478	463	493	0.766917	13	0.384615	0.501508	0.0242412	0.999407	21	0.380952	0.496732	0.00253551	0.9992
GRIN2A	CCDS10539.1	479	464	494	0.770677	12	0.333333	0.43252	0.0159526	0.999473	20	0.35	0.454146	0.00145545	0.9992
GRIN2A	CCDS10539.1	480	465	495	0.773585	12	0.333333	0.430894	0.015202	0.99944	20	0.35	0.452439	0.00135845	0.9992
GRIN2A	CCDS10539.1	481	466	496	0.778195	12	0.333333	0.428341	0.0142329	0.999407	20	0.35	0.449758	0.00124444	0.9992
GRIN2A	CCDS10539.1	482	467	497	0.775281	12	0.333333	0.429952	0.0147424	0.999506	20	0.35	0.451449	0.00132456	0.9991
GRIN2A	CCDS10539.1	483	468	498	0.775281	14	0.357143	0.460663	0.0125019	0.999638	22	0.363636	0.469038	0.00113436	0.9991
GRIN2A	CCDS10539.1	484	469	499	0.781955	14	0.357143	0.456731	0.0110703	0.999703	21	0.380952	0.487179	0.00161971	0.9991
GRIN2A	CCDS10539.1	485	470	500	0.779026	14	0.357143	0.458448	0.0117822	0.999703	21	0.380952	0.489011	0.0017915	0.9989
GRIN2A	CCDS10539.1	486	471	501	0.779026	12	0.333333	0.427885	0.0140274	0.999703	19	0.368421	0.472925	0.00223002	0.998867
GRIN2A	CCDS10539.1	487	472	502	0.784906	11	0.272727	0.347465	0.00769221	0.999703	18	0.333333	0.424679	0.00124134	0.9989
GRIN2A	CCDS10539.1	488	473	503	0.784906	11	0.272727	0.347465	0.00769221	0.999703	19	0.315789	0.402328	0.000603909	0.9989
GRIN2A	CCDS10539.1	489	474	504	0.773585	11	0.272727	0.35255	0.0097036	0.999703	20	0.35	0.452439	0.00135845	0.9988
GRIN2A	CCDS10539.1	490	475	505	0.773585	11	0.272727	0.35255	0.0097036	0.999506	20	0.35	0.452439	0.00135845	0.998667
GRIN2A	CCDS10539.1	491	476	506	0.76779	11	0.363636	0.473614	0.0294819	0.999506	20	0.4	0.520976	0.00449589	0.9986
GRIN2A	CCDS10539.1	492	477	507	0.771536	10	0.4	0.518447	0.0520383	0.999506	18	0.388889	0.504045	0.00509175	0.9986
GRIN2A	CCDS10539.1	493	478	508	0.771536	9	0.444444	0.576052	0.0952385	0.999401	16	0.4375	0.567051	0.0183817	0.998467
GRIN2A	CCDS10539.1	494	479	509	0.765799	9	0.444444	0.580367	0.101256	0.999193	15	0.4	0.52233	0.0139925	0.9984
GRIN2A	CCDS10539.1	495	480	510	0.769517	8	0.5	0.649758	0.178769	0.999193	14	0.428571	0.556936	0.0246684	0.998467
GRIN2A	CCDS10539.1	496	481	511	0.768657	9	0.444444	0.578209	0.0983489	0.999193	14	0.428571	0.557559	0.0251251	0.9986
GRIN2A	CCDS10539.1	497	482	512	0.768657	8	0.375	0.487864	0.0678639	0.999193	14	0.357143	0.464632	0.00828315	0.9987
GRIN2A	CCDS10539.1	498	483	513	0.761194	6	0.333333	0.437908	0.0913525	0.999127	12	0.333333	0.437908	0.0119071	0.998467
GRIN2A	CCDS10539.1	499	484	514	0.764925	6	0.333333	0.435772	0.0881908	0.999028	12	0.333333	0.435772	0.0110715	0.9984
GRIN2A	CCDS10539.1	500	485	515	0.765799	7	0.285714	0.373093	0.0444965	0.996903	13	0.307692	0.401792	0.00529759	0.9949
GRIN2A	CCDS10539.1	501	486	516	0.764925	6	0.333333	0.435772	0.0881908	0.997167	13	0.307692	0.402251	0.00542095	0.994933
GRIN2A	CCDS10539.1	502	487	517	0.771536	5	0.4	0.518447	0.169429	0.997331	12	0.333333	0.432039	0.00966817	0.9952
GRIN2A	CCDS10539.1	503	488	518	0.764925	5	0.4	0.522927	0.178608	0.9972	13	0.384615	0.502814	0.0178632	0.995233
GRIN2A	CCDS10539.1	504	489	519	0.758364	5	0.4	0.527451	0.188177	0.997364	13	0.384615	0.507164	0.020076	0.995433
GRIN2A	CCDS10539.1	505	490	520	0.764925	7	0.428571	0.560279	0.133559	0.997562	15	0.4	0.522927	0.0142509	0.9955
GRIN2A	CCDS10539.1	506	491	521	0.757463	8	0.5	0.660099	0.200336	0.997864	15	0.466667	0.616092	0.0439071	0.9956
GRIN2A	CCDS10539.1	507	492	522	0.75	8	0.5	0.666667	0.21371	0.99804	14	0.428571	0.571429	0.0354309	0.995567
GRIN2A	CCDS10539.1	508	493	523	0.757463	8	0.5	0.660099	0.200336	0.99827	14	0.428571	0.565799	0.0309526	0.9958
GRIN2A	CCDS10539.1	509	494	524	0.755556	8	0.5	0.661765	0.203888	0.998369	14	0.428571	0.567227	0.0319996	0.995933
GRIN2A	CCDS10539.1	510	495	525	0.748148	8	0.5	0.668317	0.217403	0.998237	14	0.428571	0.572843	0.0365227	0.995967
GRIN2A	CCDS10539.1	511	496	526	0.749077	8	0.5	0.667488	0.215667	0.998369	14	0.428571	0.572132	0.0360347	0.996267
GRIN2A	CCDS10539.1	512	497	527	0.738007	8	0.5	0.6775	0.339178	0.998534	14	0.428571	0.580714	0.042771	0.996333
GRIN2A	CCDS10539.1	513	498	528	0.741697	8	0.5	0.674129	0.337367	0.9986	14	0.428571	0.577825	0.0404073	0.996533
GRIN2A	CCDS10539.1	514	499	529	0.741697	6	0.5	0.674129	0.295956	0.998732	12	0.416667	0.561774	0.0495428	0.996633
GRIN2A	CCDS10539.1	515	500	530	0.741697	6	0.5	0.674129	0.295956	0.998797	12	0.416667	0.561774	0.0495428	0.996967
GRIN2A	CCDS10539.1	516	501	531	0.741697	6	0.5	0.674129	0.295956	0.998732	13	0.384615	0.518561	0.0271991	0.997333
GRIN2A	CCDS10539.1	517	502	532	0.740741	6	0.5	0.675	0.297916	0.998534	13	0.384615	0.519231	0.0276239	0.997433
GRIN2A	CCDS10539.1	518	503	533	0.738971	6	0.5	0.676617	0.302072	0.998468	13	0.384615	0.520475	0.0285913	0.997433
GRIN2A	CCDS10539.1	519	504	534	0.739927	6	0.5	0.675743	0.299781	0.9986	12	0.416667	0.563119	0.0508281	0.9974
GRIN2A	CCDS10539.1	520	505	535	0.74359	6	0.5	0.672414	0.292671	0.998797	11	0.363636	0.489028	0.0316287	0.9974
GRIN2A	CCDS10539.1	521	506	536	0.754579	6	0.5	0.662621	0.271636	0.998666	11	0.363636	0.481906	0.0264844	0.9974
GRIN2A	CCDS10539.1	522	507	537	0.754579	5	0.4	0.530097	0.19351	0.998929	10	0.3	0.397573	0.0158261	0.997433
GRIN2A	CCDS10539.1	523	508	538	0.741697	5	0.4	0.539303	0.212222	0.99916	10	0.3	0.404478	0.0194759	0.9975
GRIN2A	CCDS10539.1	524	509	539	0.744444	5	0.4	0.537313	0.208087	0.999061	10	0.3	0.402985	0.0186559	0.997733
GRIN2A	CCDS10539.1	525	510	540	0.751852	5	0.4	0.53202	0.197562	0.999094	11	0.272727	0.362741	0.00800319	0.998
GRIN2A	CCDS10539.1	526	511	541	0.759259	5	0.4	0.526829	0.186863	0.999094	11	0.272727	0.359202	0.00702568	0.998067
GRIN2A	CCDS10539.1	527	512	542	0.760148	4	0.5	0.657767	0.364842	0.999094	10	0.3	0.39466	0.0143855	0.9983
GRIN2A	CCDS10539.1	528	513	543	0.760148	5	0.4	0.526214	0.185645	0.999094	10	0.3	0.39466	0.0143855	0.9984
GRIN2A	CCDS10539.1	529	514	544	0.760148	5	0.4	0.526214	0.185645	0.998896	11	0.272727	0.358782	0.00691022	0.998333
GRIN2A	CCDS10539.1	530	515	545	0.754647	5	0.4	0.530049	0.193458	0.998896	10	0.3	0.397537	0.0158176	0.9984
GRIN2A	CCDS10539.1	531	516	546	0.747212	4	0.5	0.669154	0.386939	0.998896	9	0.333333	0.446103	0.0361046	0.9984
GRIN2A	CCDS10539.1	532	517	547	0.740741	4	0.5	0.675	0.399191	0.998896	8	0.375	0.50625	0.0753965	0.9984
GRIN2A	CCDS10539.1	533	518	548	0.734317	4	0.5	0.680905	0.411701	0.998896	8	0.375	0.510678	0.0810592	0.9984
GRIN2A	CCDS10539.1	534	519	549	0.741697	4	0.5	0.674129	0.397872	0.99883	7	0.285714	0.385217	0.0448277	0.9984
GRIN2A	CCDS10539.1	535	520	550	0.738007	4	0.5	0.6775	0.40465	0.998863	7	0.285714	0.387143	0.0469377	0.9984
GRIN2A	CCDS10539.1	536	521	551	0.738007	2	0.5	0.6775	0.578844	0.998896	5	0.2	0.271	0.0525059	0.998467
GRIN2A	CCDS10539.1	537	522	552	0.738007	1	0	0	0.382082	0.998896	4	0	0	0.0206238	0.998767
GRIN2A	CCDS10539.1	538	523	553	0.745387	1	0	0	0.374661	0.998896	4	0	0	0.0192724	0.9989
GRIN2A	CCDS10539.1	539	524	554	0.745387	1	0	0	0.374661	0.998896	4	0	0	0.0192724	0.9989
GRIN2A	CCDS10539.1	540	525	555	0.738007	1	0	0	0.382082	0.998896	5	0	0	0.00849526	0.9989
GRIN2A	CCDS10539.1	541	526	556	0.738007	1	0	0	0.382082	0.998896	5	0	0	0.00849526	0.9989
GRIN2A	CCDS10539.1	542	527	557	0.738007	1	0	0	0.382082	0.998797	6	0	0	0.00364956	0.998833
GRIN2A	CCDS10539.1	543	528	558	0.747212	1	0	0	0.37289	0.998732	6	0	0	0.00318699	0.998733
GRIN2A	CCDS10539.1	544	529	559	0.739777	1	0	0	0.38041	0.9986	7	0.142857	0.193108	0.0105733	0.9984
GRIN2A	CCDS10539.1	545	530	560	0.750929	1	0	0	0.369264	0.9986	7	0.142857	0.19024	0.00887291	0.9984
GRIN2A	CCDS10539.1	546	531	561	0.755556	1	0	0	0.36472	0.9986	7	0.142857	0.189076	0.00823033	0.9986
GRIN2A	CCDS10539.1	547	532	562	0.762963	1	0	0	0.357866	0.9986	6	0.166667	0.218447	0.0174176	0.998733
GRIN2A	CCDS10539.1	548	533	563	0.763838	2	0	0	0.130903	0.9986	7	0.142857	0.187026	0.00725159	0.998733
GRIN2A	CCDS10539.1	549	534	564	0.771218	2	0	0	0.125542	0.9986	8	0.25	0.324163	0.0140002	0.9986
GRIN2A	CCDS10539.1	550	535	565	0.760148	2	0	0	0.133489	0.9986	9	0.222222	0.292341	0.0075202	0.998467
GRIN2A	CCDS10539.1	551	536	566	0.760148	3	0	0	0.055011	0.998995	10	0.2	0.263107	0.00350625	0.997933
GRIN2A	CCDS10539.1	552	537	567	0.752768	3	0	0	0.0579881	0.999264	10	0.2	0.265686	0.00403909	0.9975
GRIN2A	CCDS10539.1	553	538	568	0.752768	3	0	0	0.0579881	0.999407	11	0.272727	0.362299	0.00785886	0.9975
GRIN2A	CCDS10539.1	554	539	569	0.754579	3	0	0	0.0571972	0.999407	11	0.272727	0.36143	0.00758533	0.997567
GRIN2A	CCDS10539.1	555	540	570	0.751825	3	0	0	0.0583277	0.999336	11	0.272727	0.362754	0.00800319	0.9977
GRIN2A	CCDS10539.1	556	541	571	0.748175	4	0.25	0.334146	0.124848	0.999407	11	0.363636	0.486031	0.0295601	0.997733
GRIN2A	CCDS10539.1	557	542	572	0.740876	4	0.25	0.337438	0.131261	0.99944	11	0.363636	0.49082	0.0329569	0.9978
GRIN2A	CCDS10539.1	558	543	573	0.740876	4	0.25	0.337438	0.131261	0.99944	11	0.363636	0.49082	0.0329569	0.998
GRIN2A	CCDS10539.1	559	544	574	0.748175	3	0.333333	0.445528	0.266676	0.999336	10	0.4	0.534634	0.0559112	0.998
GRIN2A	CCDS10539.1	560	545	575	0.748175	4	0.25	0.334146	0.124848	0.99944	9	0.444444	0.594038	0.105007	0.9978
GRIN2A	CCDS10539.1	561	546	576	0.757246	4	0.25	0.330144	0.117109	0.999473	10	0.5	0.660287	0.134029	0.997733
GRIN2A	CCDS10539.1	562	547	577	0.763636	4	0.25	0.327381	0.111277	0.999506	10	0.5	0.654762	0.124239	0.9977
GRIN2A	CCDS10539.1	563	548	578	0.769231	4	0.25	0.325	0.106423	0.999473	10	0.5	0.65	0.115998	0.9977
GRIN2A	CCDS10539.1	564	549	579	0.776557	4	0.25	0.321934	0.100605	0.999572	10	0.5	0.643868	0.105765	0.9977
GRIN2A	CCDS10539.1	565	550	580	0.776557	5	0.4	0.515094	0.163004	0.999703	12	0.5	0.643868	0.0769998	0.997767
GRIN2A	CCDS10539.1	566	551	581	0.78022	5	0.4	0.512676	0.157943	0.999703	12	0.5	0.640845	0.0728401	0.9978
GRIN2A	CCDS10539.1	567	552	582	0.773723	5	0.4	0.516981	0.166468	0.999703	12	0.5	0.646226	0.0802828	0.997633
GRIN2A	CCDS10539.1	568	553	583	0.772894	5	0.4	0.517536	0.167449	0.999506	13	0.538462	0.696682	0.160109	0.9975
GRIN2A	CCDS10539.1	569	554	584	0.771218	5	0.4	0.51866	0.169792	0.999506	13	0.538462	0.698197	0.161115	0.997467
GRIN2A	CCDS10539.1	570	555	585	0.771218	5	0.4	0.51866	0.169792	0.999506	13	0.538462	0.698197	0.161115	0.997433
GRIN2A	CCDS10539.1	571	556	586	0.774074	6	0.5	0.645933	0.239222	0.999506	13	0.615385	0.794994	0.277533	0.9977
GRIN2A	CCDS10539.1	572	557	587	0.781481	6	0.5	0.63981	0.225981	0.999407	13	0.615385	0.787459	0.264706	0.997567
GRIN2A	CCDS10539.1	573	558	588	0.783582	6	0.5	0.638095	0.222267	0.99944	12	0.666667	0.850794	0.408074	0.9975
GRIN2A	CCDS10539.1	574	559	589	0.774074	6	0.5	0.645933	0.239222	0.999736	14	0.714286	0.922761	0.637462	0.9975
GRIN2A	CCDS10539.1	575	560	590	0.780669	7	0.571429	0.731973	0.295956	0.999769	14	0.714286	0.914966	0.626873	0.9975
GRIN2A	CCDS10539.1	576	561	591	0.769517	7	0.571429	0.742581	0.322375	0.999802	15	0.733333	0.952979	0.843496	0.9975
GRIN2A	CCDS10539.1	577	562	592	0.764925	7	0.571429	0.747038	0.493906	0.999769	15	0.733333	0.958699	0.846213	0.9975
GRIN2A	CCDS10539.1	578	563	593	0.757463	7	0.571429	0.754398	0.498768	0.999736	16	0.6875	0.907635	0.661273	0.9975
GRIN2A	CCDS10539.1	579	564	594	0.757463	8	0.625	0.825123	0.535102	0.999736	18	0.722222	0.953476	0.859006	0.9975
GRIN2A	CCDS10539.1	580	565	595	0.753731	9	0.666667	0.884488	0.591363	0.999769	18	0.722222	0.958196	0.859955	0.9975
GRIN2A	CCDS10539.1	581	566	596	0.757463	10	0.7	0.924138	0.812664	0.999736	18	0.777778	1.02682	1	0.9977
GRIN2A	CCDS10539.1	582	567	597	0.757463	9	0.777778	1.02682	1	0.999703	17	0.823529	1.08722	0.855576	0.9977
GRIN2A	CCDS10539.1	583	568	598	0.753731	9	0.777778	1.0319	1	0.999703	17	0.823529	1.0926	0.856129	0.9977
GRIN2A	CCDS10539.1	584	569	599	0.761194	9	0.777778	1.02179	1	0.999802	16	0.8125	1.0674	0.8549	0.9977
GRIN2A	CCDS10539.1	585	570	600	0.761194	9	0.777778	1.02179	1	0.999802	16	0.8125	1.0674	0.8549	0.997633
GRIN2A	CCDS10539.1	586	571	601	0.764925	9	0.777778	1.0168	1	0.999802	17	0.823529	1.07661	0.855259	0.9977
GRIN2A	CCDS10539.1	587	572	602	0.7603	8	0.75	0.986453	1	0.999802	16	0.8125	1.06866	0.854832	0.997767
GRIN2A	CCDS10539.1	588	573	603	0.766917	8	0.75	0.977941	1	0.999802	16	0.8125	1.05944	1	0.997633
GRIN2A	CCDS10539.1	589	574	604	0.766917	8	0.75	0.977941	1	0.999802	17	0.764706	0.997116	1	0.9977
GRIN2A	CCDS10539.1	590	575	605	0.763158	8	0.75	0.982759	1	0.999802	17	0.764706	1.00203	1	0.9975
GRIN2A	CCDS10539.1	591	576	606	0.772727	7	0.857143	1.10924	1	0.999802	17	0.764706	0.989619	1	0.997433
GRIN2A	CCDS10539.1	592	577	607	0.765152	7	0.857143	1.12023	1	0.999802	17	0.764706	0.999418	1	0.9974
GRIN2A	CCDS10539.1	593	578	608	0.758491	7	0.857143	1.13006	1	0.997765	17	0.764706	1.00819	1	0.997333
GRIN2A	CCDS10539.1	594	579	609	0.762264	7	0.857143	1.12447	1	0.997529	17	0.764706	1.0032	1	0.9975
GRIN2A	CCDS10539.1	595	580	610	0.754717	7	0.857143	1.13571	1	0.997837	17	0.764706	1.01324	1	0.9975
GRIN2A	CCDS10539.1	596	581	611	0.743396	7	0.714286	0.960841	1	0.99776	16	0.75	1.00888	1	0.9977
GRIN2A	CCDS10539.1	597	582	612	0.743396	7	0.714286	0.960841	1	0.997935	17	0.705882	0.949537	0.858103	0.998
GRIN2A	CCDS10539.1	598	583	613	0.750943	7	0.714286	0.951184	0.79351	0.998073	17	0.705882	0.939994	0.856358	0.998033
GRIN2A	CCDS10539.1	599	584	614	0.759398	8	0.625	0.82302	0.532574	0.998073	17	0.647059	0.852068	0.367815	0.9982
GRIN2A	CCDS10539.1	600	585	615	0.761194	8	0.625	0.821078	0.530199	0.998435	17	0.647059	0.850058	0.364222	0.998467
GRIN2A	CCDS10539.1	601	586	616	0.753731	9	0.555556	0.737074	0.358198	0.9986	18	0.611111	0.810781	0.262742	0.9983
GRIN2A	CCDS10539.1	602	587	617	0.750929	8	0.5	0.665842	0.212222	0.998765	19	0.526316	0.700886	0.0764409	0.998433
GRIN2A	CCDS10539.1	603	588	618	0.743494	8	0.5	0.6725	0.22604	0.999094	19	0.526316	0.707895	0.0843385	0.9986
GRIN2A	CCDS10539.1	604	589	619	0.741697	8	0.5	0.674129	0.337367	0.999094	19	0.526316	0.70961	0.121315	0.9986
GRIN2A	CCDS10539.1	605	590	620	0.748148	8	0.5	0.668317	0.217403	0.999028	17	0.470588	0.629004	0.0554968	0.998667
GRIN2A	CCDS10539.1	606	591	621	0.749077	7	0.428571	0.572132	0.153804	0.999193	16	0.4375	0.584052	0.0290335	0.998733
GRIN2A	CCDS10539.1	607	592	622	0.749077	7	0.428571	0.572132	0.153804	0.999193	15	0.4	0.53399	0.0195375	0.999
GRIN2A	CCDS10539.1	608	593	623	0.749077	7	0.428571	0.572132	0.153804	0.999193	15	0.4	0.53399	0.0195375	0.9992
GRIN2A	CCDS10539.1	609	594	624	0.749077	7	0.428571	0.572132	0.153804	0.999028	15	0.4	0.53399	0.0195375	0.999167
GRIN2A	CCDS10539.1	610	595	625	0.749077	5	0.4	0.53399	0.201445	0.998863	12	0.333333	0.444992	0.0149287	0.999167
GRIN2A	CCDS10539.1	611	596	626	0.741697	4	0.25	0.337065	0.130663	0.998863	11	0.272727	0.367707	0.00972045	0.999167
GRIN2A	CCDS10539.1	612	597	627	0.749077	3	0	0	0.0596231	0.999028	10	0.2	0.266995	0.0043205	0.998767
GRIN2A	CCDS10539.1	613	598	628	0.755556	3	0	0	0.0568681	0.99916	10	0.2	0.264706	0.0038504	0.998833
GRIN2A	CCDS10539.1	614	599	629	0.759259	3	0	0	0.0553616	0.999193	10	0.2	0.263415	0.0035742	0.9991
GRIN2A	CCDS10539.1	615	600	630	0.762963	3	0	0	0.053835	0.999264	11	0.272727	0.357458	0.00658182	0.9991
GRIN2A	CCDS10539.1	616	601	631	0.762963	4	0	0	0.0226715	0.999336	12	0.25	0.32767	0.00313401	0.9991
GRIN2A	CCDS10539.1	617	602	632	0.759259	4	0	0	0.0234133	0.999193	11	0.181818	0.239468	0.00171199	0.998933
GRIN2A	CCDS10539.1	618	603	633	0.760148	4	0	0	0.0232291	0.99944	11	0.181818	0.239188	0.00167844	0.998933
GRIN2A	CCDS10539.1	619	604	634	0.762963	4	0	0	0.0226715	0.999572	11	0.181818	0.238305	0.00158002	0.999167
GRIN2A	CCDS10539.1	620	605	635	0.762963	4	0	0	0.0226715	0.999638	10	0.2	0.262136	0.00330104	0.9991
GRIN2A	CCDS10539.1	621	606	636	0.766667	4	0	0	0.0221638	0.999703	11	0.181818	0.237154	0.00145428	0.998967
GRIN2A	CCDS10539.1	622	607	637	0.764706	5	0	0	0.0107625	0.999703	12	0.166667	0.217949	0.000739019	0.9991
GRIN2A	CCDS10539.1	623	608	638	0.764706	5	0	0	0.0107625	0.999703	11	0.0909091	0.118881	0.000307608	0.9991
GRIN2A	CCDS10539.1	624	609	639	0.764706	5	0	0	0.0107625	0.999572	11	0.0909091	0.118881	0.000307608	0.998967
GRIN2A	CCDS10539.1	625	610	640	0.759124	5	0	0	0.011523	0.999369	11	0.0909091	0.119755	0.000353415	0.9989
GRIN2A	CCDS10539.1	626	611	641	0.766423	5	0	0	0.0106248	0.999264	11	0.0909091	0.118615	0.000303175	0.9989
GRIN2A	CCDS10539.1	627	612	642	0.766423	4	0	0	0.0221638	0.999264	10	0.1	0.130476	0.000616361	0.9989
GRIN2A	CCDS10539.1	628	613	643	0.766423	4	0	0	0.0221638	0.999407	9	0.111111	0.144974	0.00138009	0.9989
GRIN2A	CCDS10539.1	629	614	644	0.766423	4	0	0	0.0221638	0.99944	9	0.111111	0.144974	0.00138009	0.9989
GRIN2A	CCDS10539.1	630	615	645	0.764706	3	0	0	0.0531443	0.999407	8	0.125	0.163462	0.00313401	0.9989
GRIN2A	CCDS10539.1	631	616	646	0.757353	3	0	0	0.056178	0.999407	8	0.125	0.165049	0.0035614	0.998867
GRIN2A	CCDS10539.1	632	617	647	0.757353	2	0	0	0.135099	0.999407	7	0.142857	0.188627	0.00801441	0.9988
GRIN2A	CCDS10539.1	633	618	648	0.764706	2	0	0	0.130375	0.999506	5	0.2	0.261538	0.0399738	0.9988
GRIN2A	CCDS10539.1	634	619	649	0.761029	2	0	0	0.132744	0.999506	5	0.2	0.262802	0.0414617	0.9988
GRIN2A	CCDS10539.1	635	620	650	0.761029	2	0	0	0.132744	0.999506	5	0.2	0.262802	0.0414617	0.9988
GRIN2A	CCDS10539.1	636	621	651	0.754579	2	0	0	0.137069	0.999506	6	0.166667	0.220874	0.0194145	0.9988
GRIN2A	CCDS10539.1	637	622	652	0.754579	2	0	0	0.137069	0.999407	6	0.166667	0.220874	0.0194145	0.9988
GRIN2A	CCDS10539.1	638	623	653	0.765568	2	0	0	0.129752	0.999407	6	0.166667	0.217703	0.0168299	0.9988
GRIN2A	CCDS10539.1	639	624	654	0.762774	2	0	0	0.131477	0.999407	6	0.166667	0.218501	0.0174712	0.9988
GRIN2A	CCDS10539.1	640	625	655	0.769231	2	0	0	0.127014	0.999231	5	0.2	0.26	0.0381308	0.9988
GRIN2A	CCDS10539.1	641	626	656	0.775735	2	0	0	0.122397	0.999193	5	0.2	0.25782	0.0356056	0.9988
GRIN2A	CCDS10539.1	642	627	657	0.782288	2	0	0	0.117989	0.999264	5	0.2	0.25566	0.0328512	0.9988
GRIN2A	CCDS10539.1	643	628	658	0.782288	2	0	0	0.117989	0.999193	5	0.2	0.25566	0.0328512	0.9988
GRIN2A	CCDS10539.1	644	629	659	0.775735	2	0	0	0.122397	0.999193	5	0.2	0.25782	0.0356056	0.998867
GRIN2A	CCDS10539.1	645	630	660	0.779412	2	0	0	0.11989	0.999193	5	0.2	0.256604	0.0340036	0.9989
GRIN2A	CCDS10539.1	646	631	661	0.774908	2	0	0	0.123008	0.999193	5	0	0	0.00523689	0.9989
GRIN2A	CCDS10539.1	647	632	662	0.774908	1	0	0	0.346344	0.999193	5	0	0	0.00523689	0.998967
GRIN2A	CCDS10539.1	648	633	663	0.774908	2	0	0	0.123008	0.999193	6	0	0	0.00215212	0.999133
GRIN2A	CCDS10539.1	649	634	664	0.774908	3	0	0	0.0489104	0.999193	7	0	0	0.000936062	0.9992
GRIN2A	CCDS10539.1	650	635	665	0.765568	3	0	0	0.0528384	0.999193	7	0	0	0.00110371	0.9992
GRIN2A	CCDS10539.1	651	636	666	0.772894	3	0	0	0.0496988	0.999264	7	0	0	0.000973808	0.9991
GRIN2A	CCDS10539.1	652	637	667	0.772894	3	0	0	0.0496988	0.999264	6	0	0	0.0022075	0.999033
GRIN2A	CCDS10539.1	653	638	668	0.772059	2	0	0	0.124984	0.999336	5	0	0	0.00545491	0.9989
GRIN2A	CCDS10539.1	654	639	669	0.778598	2	0	0	0.120467	0.99916	5	0	0	0.00500093	0.9989
GRIN2A	CCDS10539.1	655	640	670	0.785978	2	0	0	0.115352	0.999193	5	0	0	0.00445852	0.9988
GRIN2A	CCDS10539.1	656	641	671	0.788889	2	0	0	0.113274	0.99916	6	0.166667	0.211268	0.0120355	0.9988
GRIN2A	CCDS10539.1	657	642	672	0.784387	2	0	0	0.116451	0.999061	6	0.166667	0.21248	0.0129054	0.9986
GRIN2A	CCDS10539.1	658	643	673	0.788104	3	0.333333	0.422956	0.216701	0.998896	7	0.285714	0.362534	0.0245708	0.9986
GRIN2A	CCDS10539.1	659	644	674	0.795539	3	0.333333	0.419003	0.206672	0.99883	8	0.375	0.471379	0.0379334	0.998733
GRIN2A	CCDS10539.1	660	645	675	0.795539	4	0.5	0.628505	0.302535	0.998797	10	0.5	0.628505	0.0820181	0.9986
GRIN2A	CCDS10539.1	661	646	676	0.795539	4	0.5	0.628505	0.302535	0.998797	11	0.545455	0.685641	0.111964	0.9986
GRIN2A	CCDS10539.1	662	647	677	0.795539	5	0.4	0.502804	0.139092	0.998534	12	0.5	0.628505	0.0579229	0.998467
GRIN2A	CCDS10539.1	663	648	678	0.795539	5	0.4	0.502804	0.139092	0.998468	13	0.538462	0.676851	0.0778211	0.998333
GRIN2A	CCDS10539.1	664	649	679	0.788104	5	0.4	0.507547	0.148401	0.998369	13	0.538462	0.683237	0.0871874	0.998167
GRIN2A	CCDS10539.1	665	650	680	0.799257	5	0.4	0.500465	0.134504	0.998172	13	0.538462	0.673703	0.0732772	0.9981
GRIN2A	CCDS10539.1	666	651	681	0.794776	6	0.5	0.629108	0.20283	0.997793	13	0.538462	0.677501	0.0788097	0.9981
GRIN2A	CCDS10539.1	667	652	682	0.802239	6	0.5	0.623256	0.190001	0.998001	13	0.615385	0.767084	0.241038	0.9981
GRIN2A	CCDS10539.1	668	653	683	0.794776	6	0.5	0.629108	0.20283	0.99804	14	0.571429	0.718981	0.103402	0.9979
GRIN2A	CCDS10539.1	669	654	684	0.783582	6	0.5	0.638095	0.222267	0.997864	14	0.571429	0.729252	0.168795	0.997767
GRIN2A	CCDS10539.1	670	655	685	0.779851	6	0.5	0.641148	0.229014	0.998435	14	0.571429	0.732741	0.172025	0.9991
GRIN2A	CCDS10539.1	671	656	686	0.773234	6	0.5	0.646635	0.24044	0.998797	14	0.571429	0.739011	0.178941	0.9991
GRIN2A	CCDS10539.1	672	657	687	0.774074	6	0.5	0.645933	0.239222	0.99883	15	0.533333	0.688995	0.11316	0.9992
GRIN2A	CCDS10539.1	673	658	688	0.766667	6	0.5	0.652174	0.250922	0.998896	15	0.533333	0.695652	0.117643	0.9992
GRIN2A	CCDS10539.1	674	659	689	0.766667	6	0.5	0.652174	0.250922	0.998896	15	0.533333	0.695652	0.117643	0.9991
GRIN2A	CCDS10539.1	675	660	690	0.766667	7	0.428571	0.559006	0.131382	0.998962	17	0.529412	0.690537	0.0857255	0.9991
GRIN2A	CCDS10539.1	676	661	691	0.765799	7	0.428571	0.559639	0.13244	0.999094	17	0.529412	0.691319	0.0863705	0.9991
GRIN2A	CCDS10539.1	677	662	692	0.762082	7	0.428571	0.562369	0.136595	0.999094	16	0.5625	0.73811	0.142588	0.9992
GRIN2A	CCDS10539.1	678	663	693	0.769517	7	0.428571	0.556936	0.128021	0.999094	15	0.6	0.77971	0.212642	0.9992
GRIN2A	CCDS10539.1	679	664	694	0.773234	6	0.5	0.646635	0.24044	0.999193	14	0.642857	0.831387	0.439491	0.9992
GRIN2A	CCDS10539.1	680	665	695	0.769517	6	0.5	0.649758	0.246719	0.999193	14	0.642857	0.835404	0.442746	0.9992
GRIN2A	CCDS10539.1	681	666	696	0.776952	6	0.5	0.643541	0.234727	0.999193	14	0.642857	0.827409	0.311264	0.9992
GRIN2A	CCDS10539.1	682	667	697	0.776952	6	0.5	0.643541	0.234727	0.999193	14	0.642857	0.827409	0.311264	0.9992
GRIN2A	CCDS10539.1	683	668	698	0.775281	6	0.5	0.644928	0.237456	0.999193	14	0.642857	0.829193	0.438053	0.9992
GRIN2A	CCDS10539.1	684	669	699	0.768657	6	0.5	0.650485	0.248162	0.999193	14	0.642857	0.836338	0.443524	0.999167
GRIN2A	CCDS10539.1	685	670	700	0.76779	6	0.5	0.65122	0.249388	0.999193	14	0.642857	0.837282	0.444431	0.999133
GRIN2A	CCDS10539.1	686	671	701	0.771536	7	0.571429	0.740638	0.31783	0.999193	15	0.666667	0.864078	0.46263	0.999333
GRIN2A	CCDS10539.1	687	672	702	0.772388	7	0.571429	0.739821	0.315582	0.999193	14	0.642857	0.832298	0.440125	0.999433
GRIN2A	CCDS10539.1	688	673	703	0.776119	7	0.571429	0.736264	0.306652	0.999193	14	0.642857	0.828297	0.313334	0.9994
GRIN2A	CCDS10539.1	689	674	704	0.781955	6	0.5	0.639423	0.225342	0.999193	13	0.615385	0.786982	0.263909	0.9994
GRIN2A	CCDS10539.1	690	675	705	0.785714	6	0.5	0.636364	0.218349	0.999193	12	0.583333	0.742424	0.236727	0.999467
GRIN2A	CCDS10539.1	691	676	706	0.778195	5	0.4	0.51401	0.160548	0.999193	11	0.545455	0.700922	0.140366	0.999567
GRIN2A	CCDS10539.1	692	677	707	0.779026	5	0.4	0.513462	0.15964	0.999193	10	0.5	0.641827	0.102793	0.999733
GRIN2A	CCDS10539.1	693	678	708	0.786517	4	0.5	0.635714	0.31968	0.999193	9	0.555556	0.706349	0.181482	0.9998
GRIN2A	CCDS10539.1	694	679	709	0.794007	4	0.5	0.629717	0.305337	0.999193	8	0.5	0.629717	0.122355	0.999867
GRIN2A	CCDS10539.1	695	680	710	0.800752	4	0.5	0.624413	0.292579	0.999193	8	0.5	0.624413	0.113115	1
GRIN2A	CCDS10539.1	696	681	711	0.8	4	0.5	0.625	0.293784	0.999407	8	0.5	0.625	0.113994	1
GRIN2A	CCDS10539.1	697	682	712	0.803774	4	0.25	0.311033	0.0794717	0.999407	9	0.444444	0.552947	0.0513744	1
GRIN2A	CCDS10539.1	698	683	713	0.796226	4	0.25	0.313981	0.0851135	0.999407	8	0.375	0.470972	0.0376235	1
GRIN2A	CCDS10539.1	699	684	714	0.80303	4	0.25	0.311321	0.0798807	0.999407	7	0.428571	0.533693	0.0750446	1
GRIN2A	CCDS10539.1	700	685	715	0.810606	4	0.25	0.308411	0.074466	0.999336	8	0.375	0.462617	0.0301333	0.999933
GRIN2A	CCDS10539.1	701	686	716	0.810606	5	0.4	0.493458	0.122201	0.999407	9	0.444444	0.548287	0.0462362	0.9998
GRIN2A	CCDS10539.1	702	687	717	0.813688	5	0.4	0.491589	0.118951	0.999407	10	0.4	0.491589	0.0198292	0.9998
GRIN2A	CCDS10539.1	703	688	718	0.806084	5	0.4	0.496226	0.127162	0.999407	9	0.444444	0.551363	0.0496661	0.9998
GRIN2A	CCDS10539.1	704	689	719	0.814394	5	0.4	0.491163	0.118042	0.999407	10	0.5	0.613953	0.0623035	0.9998
GRIN2A	CCDS10539.1	705	690	720	0.80303	5	0.4	0.498113	0.130665	0.999336	10	0.5	0.622642	0.0737586	0.9996
GRIN2A	CCDS10539.1	706	691	721	0.809886	4	0.5	0.617371	0.275325	0.999193	8	0.5	0.617371	0.101056	0.9997
GRIN2A	CCDS10539.1	707	692	722	0.80303	7	0.571429	0.71159	0.249753	0.999193	10	0.6	0.74717	0.19597	0.9997
GRIN2A	CCDS10539.1	708	693	723	0.8	8	0.5	0.625	0.131477	0.999336	11	0.545455	0.681818	0.105031	0.9997
GRIN2A	CCDS10539.1	709	694	724	0.799242	8	0.5	0.625592	0.132511	0.999407	11	0.545455	0.682464	0.106132	0.9997
GRIN2A	CCDS10539.1	710	695	725	0.791667	9	0.444444	0.561404	0.0744058	0.999407	12	0.5	0.631579	0.0612189	0.9997
GRIN2A	CCDS10539.1	711	696	726	0.80303	8	0.5	0.622642	0.127434	0.999407	12	0.5	0.622642	0.0513221	0.9997
GRIN2A	CCDS10539.1	712	697	727	0.795455	8	0.5	0.628571	0.137679	0.999193	12	0.5	0.628571	0.0579672	0.9995
GRIN2A	CCDS10539.1	713	698	728	0.795455	9	0.444444	0.55873	0.0713721	0.999094	13	0.461538	0.58022	0.0297416	0.999467
GRIN2A	CCDS10539.1	714	699	729	0.793233	9	0.444444	0.560295	0.0730794	0.999094	13	0.461538	0.581845	0.0308604	0.9994
GRIN2A	CCDS10539.1	715	700	730	0.799242	10	0.4	0.500474	0.0353279	0.999094	14	0.428571	0.536222	0.0135064	0.9994
GRIN2A	CCDS10539.1	716	701	731	0.800752	10	0.4	0.499531	0.0346925	0.999094	14	0.428571	0.535211	0.0130882	0.999467
GRIN2A	CCDS10539.1	717	702	732	0.789474	10	0.3	0.38	0.0141546	0.99916	14	0.357143	0.452381	0.00522101	0.999433
GRIN2A	CCDS10539.1	718	703	733	0.781955	11	0.272727	0.348776	0.00827651	0.99916	15	0.333333	0.426282	0.00304545	0.9994
GRIN2A	CCDS10539.1	719	704	734	0.775281	12	0.25	0.322464	0.00482012	0.999094	17	0.352941	0.455243	0.00295327	0.9994
GRIN2A	CCDS10539.1	720	705	735	0.772388	12	0.25	0.323671	0.00503006	0.999094	18	0.333333	0.431562	0.00166708	0.999433
GRIN2A	CCDS10539.1	721	706	736	0.768657	12	0.25	0.325243	0.00544085	0.999094	18	0.333333	0.433657	0.001864	0.9995
GRIN2A	CCDS10539.1	722	707	737	0.774436	12	0.25	0.322816	0.0048332	0.998896	17	0.294118	0.379783	0.00100998	0.9995
GRIN2A	CCDS10539.1	723	708	738	0.774436	12	0.25	0.322816	0.0048332	0.998732	17	0.294118	0.379783	0.00100998	0.998667
GRIN2A	CCDS10539.1	724	709	739	0.766917	12	0.25	0.32598	0.00561094	0.998534	17	0.294118	0.383506	0.00122298	0.997067
GRIN2A	CCDS10539.1	725	710	740	0.759398	12	0.25	0.329208	0.0064437	0.999061	17	0.294118	0.387303	0.00141934	0.9972
GRIN2A	CCDS10539.1	726	711	741	0.756554	12	0.25	0.330446	0.0068427	0.999193	17	0.294118	0.388759	0.00151949	0.9972
GRIN2A	CCDS10539.1	727	712	742	0.757463	13	0.307692	0.406214	0.0112868	0.999127	18	0.333333	0.440066	0.00248254	0.997367
GRIN2A	CCDS10539.1	728	713	743	0.764925	12	0.333333	0.435772	0.0172011	0.999094	18	0.388889	0.508401	0.00603241	0.997833
GRIN2A	CCDS10539.1	729	714	744	0.764925	13	0.384615	0.502814	0.0249805	0.999094	19	0.421053	0.550449	0.00897313	0.9981
GRIN2A	CCDS10539.1	730	715	745	0.764925	13	0.384615	0.502814	0.0249805	0.999094	19	0.421053	0.550449	0.00897313	0.998233
GRIN2A	CCDS10539.1	731	716	746	0.764045	13	0.384615	0.503394	0.0253984	0.99916	19	0.421053	0.551084	0.00916867	0.9983
GRIN2A	CCDS10539.1	732	717	747	0.7603	13	0.307692	0.404699	0.0106983	0.999193	18	0.388889	0.511494	0.00678495	0.9983
GRIN2A	CCDS10539.1	733	718	748	0.757463	13	0.307692	0.406214	0.0112868	0.999336	18	0.388889	0.51341	0.00714711	0.998333
GRIN2A	CCDS10539.1	734	719	749	0.757463	14	0.285714	0.377199	0.00608539	0.999407	19	0.368421	0.486388	0.00388248	0.9984
GRIN2A	CCDS10539.1	735	720	750	0.753731	16	0.3125	0.414604	0.00593839	0.999407	20	0.35	0.464356	0.00239255	0.998467
GRIN2A	CCDS10539.1	736	721	751	0.757463	16	0.3125	0.412562	0.00553974	0.999407	20	0.35	0.462069	0.00216508	0.998733
GRIN2A	CCDS10539.1	737	722	752	0.758364	16	0.3125	0.412071	0.00542804	0.999336	20	0.35	0.46152	0.00211718	0.998867
GRIN2A	CCDS10539.1	738	723	753	0.758364	13	0.230769	0.304299	0.00342659	0.99944	19	0.263158	0.347007	0.000408057	0.9989
GRIN2A	CCDS10539.1	739	724	754	0.764045	13	0.230769	0.302036	0.00295966	0.999336	19	0.263158	0.344427	0.000350676	0.998833
GRIN2A	CCDS10539.1	740	725	755	0.761194	14	0.285714	0.37535	0.00569654	0.999297	20	0.3	0.394118	0.000631699	0.998967
GRIN2A	CCDS10539.1	741	726	756	0.772388	14	0.357143	0.462388	0.0132109	0.99916	20	0.35	0.45314	0.00140521	0.999133
GRIN2A	CCDS10539.1	742	727	757	0.764925	15	0.333333	0.435772	0.00857363	0.999193	20	0.35	0.457561	0.00173405	0.9991
GRIN2A	CCDS10539.1	743	728	758	0.764925	15	0.333333	0.435772	0.00857363	0.999094	20	0.35	0.457561	0.00173405	0.9991
GRIN2A	CCDS10539.1	744	729	759	0.757463	15	0.333333	0.440066	0.0100191	0.999094	20	0.35	0.462069	0.00216508	0.998967
GRIN2A	CCDS10539.1	745	730	760	0.753731	15	0.333333	0.442244	0.0106554	0.999094	20	0.35	0.464356	0.00239255	0.9989
GRIN2A	CCDS10539.1	746	731	761	0.753731	15	0.333333	0.442244	0.0106554	0.999193	20	0.35	0.464356	0.00239255	0.998833
GRIN2A	CCDS10539.1	747	732	762	0.745318	15	0.333333	0.447236	0.0124152	0.999264	20	0.35	0.469598	0.00290511	0.9989
GRIN2A	CCDS10539.1	748	733	763	0.749064	14	0.357143	0.476786	0.0191463	0.999407	19	0.368421	0.491842	0.0047996	0.9989
GRIN2A	CCDS10539.1	749	734	764	0.749064	13	0.384615	0.513462	0.0329755	0.999336	18	0.388889	0.519167	0.00873151	0.9989
GRIN2A	CCDS10539.1	750	735	765	0.749064	12	0.416667	0.55625	0.0568388	0.999407	16	0.375	0.500625	0.0105991	0.999033
GRIN2A	CCDS10539.1	751	736	766	0.752809	12	0.416667	0.553483	0.0538573	0.999407	15	0.4	0.531343	0.0182314	0.999133
GRIN2A	CCDS10539.1	752	737	767	0.75188	12	0.416667	0.554167	0.054574	0.999336	15	0.4	0.532	0.0184896	0.9992
GRIN2A	CCDS10539.1	753	738	768	0.746269	12	0.416667	0.558333	0.0588391	0.999264	16	0.4375	0.58625	0.0304297	0.9994
GRIN2A	CCDS10539.1	754	739	769	0.739777	12	0.416667	0.563233	0.0643163	0.999193	16	0.4375	0.591394	0.0342779	0.999333
GRIN2A	CCDS10539.1	755	740	770	0.739777	12	0.416667	0.563233	0.0643163	0.999193	16	0.4375	0.591394	0.0342779	0.999433
GRIN2A	CCDS10539.1	756	741	771	0.749064	12	0.416667	0.55625	0.0568388	0.999094	16	0.4375	0.584062	0.0290335	0.999267
GRIN2A	CCDS10539.1	757	742	772	0.75188	13	0.384615	0.511538	0.0314387	0.999028	17	0.411765	0.547647	0.0151755	0.9992
GRIN2A	CCDS10539.1	758	743	773	0.74812	12	0.333333	0.445561	0.0221638	0.999094	17	0.411765	0.550399	0.0164104	0.999333
GRIN2A	CCDS10539.1	759	744	774	0.74812	12	0.333333	0.445561	0.0221638	0.999094	17	0.352941	0.471771	0.00578889	0.9994
GRIN2A	CCDS10539.1	760	745	775	0.75188	13	0.307692	0.409231	0.0124152	0.99916	19	0.315789	0.42	0.0015324	0.9994
GRIN2A	CCDS10539.1	761	746	776	0.752809	14	0.357143	0.474414	0.0179175	0.999127	20	0.35	0.464925	0.00243933	0.999233
GRIN2A	CCDS10539.1	762	747	777	0.742537	15	0.333333	0.448911	0.0130542	0.998962	21	0.333333	0.448911	0.00177927	0.998967
GRIN2A	CCDS10539.1	763	748	778	0.746269	14	0.357143	0.478571	0.0199961	0.998929	21	0.333333	0.446667	0.00159143	0.9991
GRIN2A	CCDS10539.1	764	749	779	0.749064	14	0.357143	0.476786	0.0191463	0.998896	20	0.35	0.46725	0.0026383	0.999233
GRIN2A	CCDS10539.1	765	750	780	0.749064	13	0.384615	0.513462	0.0329755	0.999028	19	0.368421	0.491842	0.0047996	0.999433
GRIN2A	CCDS10539.1	766	751	781	0.75188	11	0.363636	0.483636	0.0375222	0.998896	17	0.352941	0.469412	0.00525078	0.999267
GRIN2A	CCDS10539.1	767	752	782	0.759398	11	0.363636	0.478848	0.0339296	0.998765	17	0.352941	0.464764	0.00438458	0.9991
GRIN2A	CCDS10539.1	768	753	783	0.75188	11	0.363636	0.483636	0.0375222	0.998666	18	0.388889	0.517222	0.00819039	0.999267
GRIN2A	CCDS10539.1	769	754	784	0.75188	12	0.416667	0.554167	0.054574	0.99883	18	0.444444	0.591111	0.021778	0.999267
GRIN2A	CCDS10539.1	770	755	785	0.753731	11	0.454545	0.60306	0.0913525	0.998534	17	0.470588	0.624345	0.0538452	0.998833
GRIN2A	CCDS10539.1	771	756	786	0.75	10	0.4	0.533333	0.0680142	0.998402	16	0.4375	0.583333	0.02851	0.9989
GRIN2A	CCDS10539.1	772	757	787	0.749064	9	0.333333	0.445	0.046129	0.998336	15	0.4	0.534	0.0195387	0.9989
GRIN2A	CCDS10539.1	773	758	788	0.7603	8	0.375	0.493227	0.0735328	0.998172	15	0.466667	0.613793	0.0418609	0.9989
GRIN2A	CCDS10539.1	774	759	789	0.766917	8	0.375	0.488971	0.0687628	0.998303	15	0.466667	0.608497	0.0375345	0.999033
GRIN2A	CCDS10539.1	775	760	790	0.773585	7	0.428571	0.554007	0.123239	0.998303	14	0.5	0.646341	0.0599142	0.9991
GRIN2A	CCDS10539.1	776	761	791	0.769811	7	0.428571	0.556723	0.127657	0.998237	14	0.5	0.64951	0.0636249	0.998933
GRIN2A	CCDS10539.1	777	762	792	0.770677	6	0.5	0.64878	0.244654	0.998034	14	0.5	0.64878	0.0626311	0.9991
GRIN2A	CCDS10539.1	778	763	793	0.771536	6	0.5	0.648058	0.24356	0.997694	14	0.5	0.648058	0.0618133	0.9991
GRIN2A	CCDS10539.1	779	764	794	0.764045	6	0.5	0.654412	0.254906	0.997134	14	0.5	0.654412	0.0693445	0.9991
GRIN2A	CCDS10539.1	780	765	795	0.773585	6	0.5	0.646341	0.239963	0.996129	14	0.5	0.646341	0.0599142	0.999033
GRIN2A	CCDS10539.1	781	766	796	0.773585	6	0.5	0.646341	0.239963	0.996063	15	0.466667	0.603252	0.0330791	0.9989
GRIN2A	CCDS10539.1	782	767	797	0.766917	6	0.5	0.651961	0.250519	0.995766	15	0.466667	0.608497	0.0375345	0.998567
GRIN2A	CCDS10539.1	783	768	798	0.7603	7	0.428571	0.563688	0.139113	0.995503	16	0.4375	0.575431	0.0229994	0.998133
GRIN2A	CCDS10539.1	784	769	799	0.764045	7	0.428571	0.560924	0.134459	0.995272	15	0.4	0.523529	0.0145124	0.998
GRIN2A	CCDS10539.1	785	770	800	0.770677	7	0.428571	0.556098	0.126581	0.994998	15	0.4	0.519024	0.0125904	0.997633
GRIN2A	CCDS10539.1	786	771	801	0.778195	8	0.375	0.481884	0.0609165	0.998199	16	0.375	0.481884	0.00539003	0.996267
GRIN2A	CCDS10539.1	787	772	802	0.776119	9	0.333333	0.429487	0.0323226	0.999802	17	0.352941	0.454751	0.00289773	0.996267
GRIN2A	CCDS10539.1	788	773	803	0.776119	8	0.375	0.483173	0.0624387	0.999802	16	0.375	0.483173	0.00570205	0.9966
GRIN2A	CCDS10539.1	789	774	804	0.779026	8	0.375	0.48137	0.060297	0.999769	15	0.333333	0.427885	0.00325569	0.9968
GRIN2A	CCDS10539.1	790	775	805	0.779851	9	0.333333	0.427432	0.0303898	0.999736	15	0.333333	0.427432	0.00321177	0.9969
GRIN2A	CCDS10539.1	791	776	806	0.782772	7	0.285714	0.365003	0.0362431	0.999802	12	0.333333	0.425837	0.007607	0.997267
GRIN2A	CCDS10539.1	792	777	807	0.775281	7	0.142857	0.184265	0.0108369	0.999802	12	0.25	0.322464	0.0024402	0.997333
GRIN2A	CCDS10539.1	793	778	808	0.790262	6	0.166667	0.2109	0.0181551	0.999802	10	0.3	0.379621	0.0082095	0.9975
GRIN2A	CCDS10539.1	794	779	809	0.797753	6	0.166667	0.20892	0.0165414	0.999802	10	0.3	0.376056	0.00709094	0.9977
GRIN2A	CCDS10539.1	795	780	810	0.802239	6	0.166667	0.207752	0.0159037	0.999802	10	0.3	0.373953	0.00654668	0.9981
GRIN2A	CCDS10539.1	796	781	811	0.808989	6	0.166667	0.206019	0.0145382	0.999802	11	0.363636	0.449495	0.00961904	0.998067
GRIN2A	CCDS10539.1	797	782	812	0.798507	7	0.142857	0.178905	0.00756007	0.999802	12	0.333333	0.417445	0.00543775	0.9981
GRIN2A	CCDS10539.1	798	783	813	0.798507	7	0.142857	0.178905	0.00756007	0.999802	12	0.333333	0.417445	0.00543775	0.998167
GRIN2A	CCDS10539.1	799	784	814	0.802239	8	0.25	0.311628	0.0138406	0.999802	12	0.333333	0.415504	0.00502506	0.9983
GRIN2A	CCDS10539.1	800	785	815	0.809701	8	0.25	0.308756	0.0124152	0.999802	11	0.272727	0.336824	0.0024402	0.998167
GRIN2A	CCDS10539.1	801	786	816	0.809701	8	0.25	0.308756	0.0124152	0.999802	11	0.272727	0.336824	0.0024402	0.9983
GRIN2A	CCDS10539.1	802	787	817	0.820896	8	0.25	0.304545	0.0103632	1	11	0.272727	0.332231	0.001864	0.9983
GRIN2A	CCDS10539.1	803	788	818	0.814126	10	0.2	0.245662	0.00229032	1	13	0.307692	0.377942	0.00171168	0.9983
GRIN2A	CCDS10539.1	804	789	819	0.802974	10	0.2	0.249074	0.0028479	1	13	0.230769	0.287393	0.000574859	0.9983
GRIN2A	CCDS10539.1	805	790	820	0.796296	11	0.272727	0.342495	0.00613392	1	14	0.285714	0.358804	0.00130502	0.9983
GRIN2A	CCDS10539.1	806	791	821	0.797048	11	0.272727	0.342172	0.00608877	1	15	0.266667	0.334568	0.000589475	0.998233
GRIN2A	CCDS10539.1	807	792	822	0.806691	11	0.272727	0.338081	0.00503006	1	15	0.266667	0.330568	0.000440394	0.9983
GRIN2A	CCDS10539.1	808	793	823	0.811111	11	0.272727	0.336239	0.00464148	1	14	0.285714	0.35225	0.000895681	0.9983
GRIN2A	CCDS10539.1	809	794	824	0.807407	11	0.272727	0.337781	0.00498755	1	15	0.266667	0.330275	0.000435681	0.9984
GRIN2A	CCDS10539.1	810	795	825	0.811111	11	0.272727	0.336239	0.00464148	1	15	0.266667	0.328767	0.000394237	0.9984
GRIN2A	CCDS10539.1	811	796	826	0.801471	12	0.25	0.311927	0.00263664	1	16	0.25	0.311927	0.000255934	0.9984
GRIN2A	CCDS10539.1	812	797	827	0.801471	12	0.25	0.311927	0.00263664	1	16	0.3125	0.389908	0.000954343	0.9984
GRIN2A	CCDS10539.1	813	798	828	0.8125	12	0.25	0.307692	0.00220504	1	17	0.352941	0.434389	0.00112666	0.998233
GRIN2A	CCDS10539.1	814	799	829	0.8125	12	0.25	0.307692	0.00220504	1	17	0.352941	0.434389	0.00112666	0.9983
GRIN2A	CCDS10539.1	815	800	830	0.808824	12	0.25	0.309091	0.00229032	1	17	0.352941	0.436364	0.00124426	0.998333
GRIN2A	CCDS10539.1	816	801	831	0.809524	12	0.25	0.308824	0.00229032	1	17	0.352941	0.435986	0.0012195	0.9984
GRIN2A	CCDS10539.1	817	802	832	0.802198	12	0.333333	0.415525	0.00932506	1	18	0.444444	0.554033	0.00669215	0.9984
GRIN2A	CCDS10539.1	818	803	833	0.798535	12	0.416667	0.521789	0.0263392	1	18	0.5	0.626147	0.0200468	0.998367
GRIN2A	CCDS10539.1	819	804	834	0.791971	12	0.416667	0.526114	0.0297132	0.999934	18	0.5	0.631336	0.0231636	0.997733
GRIN2A	CCDS10539.1	820	805	835	0.792727	13	0.384615	0.48518	0.0162298	0.999802	19	0.473684	0.597537	0.0121658	0.997
GRIN2A	CCDS10539.1	821	806	836	0.789091	13	0.461538	0.584899	0.0441561	0.999868	20	0.55	0.697005	0.0601178	0.997133
GRIN2A	CCDS10539.1	822	807	837	0.791971	13	0.461538	0.582772	0.0419196	1	20	0.55	0.69447	0.0410547	0.997067
GRIN2A	CCDS10539.1	823	808	838	0.798535	12	0.5	0.626147	0.0686514	1	19	0.578947	0.725012	0.0857213	0.997
GRIN2A	CCDS10539.1	824	809	839	0.794872	14	0.571429	0.718894	0.120464	0.999703	21	0.619048	0.778802	0.115441	0.996833
GRIN2A	CCDS10539.1	825	810	840	0.787546	16	0.5625	0.714244	0.134252	0.999506	23	0.608696	0.772902	0.0938696	0.9967
GRIN2A	CCDS10539.1	826	811	841	0.787546	16	0.5625	0.714244	0.134252	0.999231	23	0.608696	0.772902	0.0938696	0.9967
GRIN2A	CCDS10539.1	827	812	842	0.786765	16	0.5625	0.714953	0.134504	0.999336	22	0.590909	0.751062	0.0807043	0.996667
GRIN2A	CCDS10539.1	828	813	843	0.8	15	0.6	0.75	0.190122	0.999407	21	0.619048	0.77381	0.108072	0.996833
GRIN2A	CCDS10539.1	829	814	844	0.799257	16	0.5625	0.703779	0.0821503	0.999264	22	0.590909	0.739323	0.0685514	0.996633
GRIN2A	CCDS10539.1	830	815	845	0.791822	15	0.533333	0.673552	0.0727748	0.999193	21	0.571429	0.721663	0.065558	0.996633
GRIN2A	CCDS10539.1	831	816	846	0.784387	15	0.533333	0.679937	0.0814378	0.999193	22	0.590909	0.753339	0.0835118	0.9968
GRIN2A	CCDS10539.1	832	817	847	0.784387	15	0.533333	0.679937	0.0814378	0.999506	22	0.590909	0.753339	0.0835118	0.997
GRIN2A	CCDS10539.1	833	818	848	0.779851	16	0.5625	0.721292	0.140118	0.999638	23	0.608696	0.780528	0.137873	0.9972
GRIN2A	CCDS10539.1	834	819	849	0.787313	15	0.6	0.762085	0.204067	0.999736	22	0.590909	0.750539	0.0801383	0.9972
GRIN2A	CCDS10539.1	835	820	850	0.787313	16	0.5625	0.714455	0.134391	0.999638	22	0.590909	0.750539	0.0801383	0.9972
GRIN2A	CCDS10539.1	836	821	851	0.787313	15	0.533333	0.677409	0.0780018	0.999703	23	0.565217	0.717906	0.0511453	0.9972
GRIN2A	CCDS10539.1	837	822	852	0.779851	17	0.529412	0.678863	0.0675727	0.999703	24	0.583333	0.748006	0.0669622	0.997267
GRIN2A	CCDS10539.1	838	823	853	0.780669	18	0.555556	0.71164	0.10455	0.999703	25	0.6	0.768571	0.102221	0.997133
GRIN2A	CCDS10539.1	839	824	854	0.769517	18	0.555556	0.721954	0.115011	0.999703	25	0.6	0.77971	0.113387	0.997267
GRIN2A	CCDS10539.1	840	825	855	0.780669	19	0.578947	0.741604	0.119039	0.999703	26	0.653846	0.837546	0.239536	0.9972
GRIN2A	CCDS10539.1	841	826	856	0.776952	22	0.636364	0.819052	0.228381	0.999736	30	0.666667	0.858054	0.27667	0.997067
GRIN2A	CCDS10539.1	842	827	857	0.776952	21	0.666667	0.858054	0.413884	0.999802	30	0.7	0.900957	0.484652	0.997
GRIN2A	CCDS10539.1	843	828	858	0.776952	21	0.666667	0.858054	0.413884	0.999769	29	0.689655	0.887642	0.367636	0.997
GRIN2A	CCDS10539.1	844	829	859	0.768657	21	0.666667	0.867314	0.423267	0.999769	28	0.678571	0.882802	0.365705	0.997
GRIN2A	CCDS10539.1	845	830	860	0.768657	21	0.666667	0.867314	0.423267	0.999802	28	0.678571	0.882802	0.365705	0.997067
GRIN2A	CCDS10539.1	846	831	861	0.776119	22	0.681818	0.878497	0.431443	0.999802	29	0.689655	0.888594	0.369013	0.997
GRIN2A	CCDS10539.1	847	832	862	0.768657	22	0.681818	0.887026	0.445361	1	29	0.689655	0.897221	0.483039	0.997
GRIN2A	CCDS10539.1	848	833	863	0.772388	21	0.666667	0.863124	0.418224	1	27	0.666667	0.863124	0.349015	0.9972
GRIN2A	CCDS10539.1	849	834	864	0.776119	21	0.619048	0.797619	0.210641	1	27	0.62963	0.811254	0.177464	0.9974
GRIN2A	CCDS10539.1	850	835	865	0.779851	22	0.636364	0.816007	0.223347	1	28	0.642857	0.824334	0.183979	0.997567
GRIN2A	CCDS10539.1	851	836	866	0.772388	21	0.666667	0.863124	0.418224	0.999934	28	0.642857	0.832298	0.194221	0.9977
GRIN2A	CCDS10539.1	852	837	867	0.772388	21	0.666667	0.863124	0.418224	1	28	0.642857	0.832298	0.194221	0.9977
GRIN2A	CCDS10539.1	853	838	868	0.768657	21	0.666667	0.867314	0.423267	1	28	0.642857	0.836338	0.200892	0.9977
GRIN2A	CCDS10539.1	854	839	869	0.769517	21	0.666667	0.866345	0.422059	0.999934	30	0.633333	0.823027	0.154092	0.9977
GRIN2A	CCDS10539.1	855	840	870	0.768657	19	0.631579	0.821666	0.284648	0.999802	28	0.607143	0.789875	0.132335	0.9977
GRIN2A	CCDS10539.1	856	841	871	0.772388	17	0.647059	0.837738	0.365195	0.999802	26	0.615385	0.79673	0.124137	0.997667
GRIN2A	CCDS10539.1	857	842	872	0.772388	18	0.611111	0.791197	0.26085	0.999802	27	0.592593	0.767221	0.0830221	0.997567
GRIN2A	CCDS10539.1	858	843	873	0.765799	18	0.611111	0.798004	0.26735	0.999868	27	0.592593	0.773822	0.0906323	0.9977
GRIN2A	CCDS10539.1	859	844	874	0.756458	18	0.611111	0.807859	0.279784	1	27	0.592593	0.783379	0.132787	0.9975
GRIN2A	CCDS10539.1	860	845	875	0.757353	18	0.611111	0.806904	0.278378	1	27	0.592593	0.782452	0.13197	0.9972
GRIN2A	CCDS10539.1	861	846	876	0.764706	19	0.631579	0.825911	0.292049	0.999934	31	0.645161	0.843672	0.222802	0.996967
GRIN2A	CCDS10539.1	862	847	877	0.771218	18	0.611111	0.792398	0.261878	0.999736	30	0.633333	0.821212	0.151501	0.996967
GRIN2A	CCDS10539.1	863	848	878	0.77037	18	0.611111	0.793269	0.26253	0.999638	30	0.633333	0.822115	0.152826	0.996733
GRIN2A	CCDS10539.1	864	849	879	0.77037	18	0.611111	0.793269	0.26253	0.999539	30	0.633333	0.822115	0.152826	0.996733
GRIN2A	CCDS10539.1	865	850	880	0.769517	18	0.666667	0.866345	0.397483	0.999703	30	0.666667	0.866345	0.287455	0.996533
GRIN2A	CCDS10539.1	866	851	881	0.776119	17	0.705882	0.909502	0.678836	0.999506	29	0.689655	0.888594	0.369013	0.9953
GRIN2A	CCDS10539.1	867	852	882	0.776119	17	0.705882	0.909502	0.678836	0.999506	27	0.703704	0.906695	0.465516	0.995933
GRIN2A	CCDS10539.1	868	853	883	0.776119	17	0.705882	0.909502	0.678836	0.999506	27	0.703704	0.906695	0.465516	0.996033
GRIN2A	CCDS10539.1	869	854	884	0.776952	18	0.666667	0.858054	0.381539	0.999506	29	0.689655	0.887642	0.367636	0.9962
GRIN2A	CCDS10539.1	870	855	885	0.784387	19	0.684211	0.872287	0.393944	0.999506	30	0.7	0.892417	0.369609	0.9964
GRIN2A	CCDS10539.1	871	856	886	0.784387	18	0.666667	0.849921	0.36933	0.999506	29	0.655172	0.835267	0.190136	0.996467
GRIN2A	CCDS10539.1	872	857	887	0.784387	17	0.529412	0.674937	0.0628554	0.999703	27	0.592593	0.755485	0.0741233	0.9967
GRIN2A	CCDS10539.1	873	858	888	0.784387	20	0.5	0.637441	0.028709	0.999703	29	0.551724	0.703383	0.0220244	0.9969
GRIN2A	CCDS10539.1	874	859	889	0.783582	20	0.5	0.638095	0.0291228	0.999769	30	0.566667	0.723175	0.0272283	0.996967
GRIN2A	CCDS10539.1	875	860	890	0.780669	22	0.454545	0.582251	0.0119421	0.999802	32	0.53125	0.680506	0.0114351	0.997
GRIN2A	CCDS10539.1	876	861	891	0.787313	22	0.454545	0.577337	0.010129	0.999703	32	0.53125	0.674763	0.0101057	0.997067
GRIN2A	CCDS10539.1	877	862	892	0.787313	21	0.428571	0.544347	0.00725363	1	32	0.53125	0.674763	0.0101057	0.9973
GRIN2A	CCDS10539.1	878	863	893	0.794776	21	0.428571	0.539235	0.00597606	1	32	0.53125	0.668427	0.00622192	0.9975
GRIN2A	CCDS10539.1	879	864	894	0.802239	22	0.454545	0.566596	0.00683057	0.999934	36	0.583333	0.727132	0.0137639	0.9977
GRIN2A	CCDS10539.1	880	865	895	0.796992	21	0.47619	0.597484	0.013582	0.999802	35	0.6	0.75283	0.0335523	0.9978
GRIN2A	CCDS10539.1	881	866	896	0.8	20	0.45	0.5625	0.00957405	0.999802	35	0.6	0.75	0.0233293	0.997967
GRIN2A	CCDS10539.1	882	867	897	0.8	20	0.45	0.5625	0.00957405	0.999802	34	0.617647	0.772059	0.0465433	0.998433
GRIN2A	CCDS10539.1	883	868	898	0.796226	20	0.4	0.50237	0.00419292	0.999868	33	0.575758	0.723108	0.0182371	0.998667
GRIN2A	CCDS10539.1	884	869	899	0.786517	21	0.428571	0.544898	0.00738421	0.999934	36	0.583333	0.741667	0.0260796	0.9988
GRIN2A	CCDS10539.1	885	870	900	0.777358	21	0.428571	0.551318	0.00954413	1	34	0.588235	0.75671	0.0399919	0.9986
GRIN2A	CCDS10539.1	886	871	901	0.770677	22	0.454545	0.5898	0.0145916	1	35	0.6	0.778537	0.0636249	0.998867
GRIN2A	CCDS10539.1	887	872	902	0.773585	22	0.454545	0.587583	0.0138314	1	35	0.6	0.77561	0.0616268	0.9989
GRIN2A	CCDS10539.1	888	873	903	0.773585	21	0.47619	0.615563	0.0217609	1	34	0.617647	0.798422	0.0871019	0.9989
GRIN2A	CCDS10539.1	889	874	904	0.778195	22	0.5	0.642512	0.0252206	1	36	0.611111	0.785293	0.0638514	0.9989
GRIN2A	CCDS10539.1	890	875	905	0.778195	22	0.5	0.642512	0.0252206	1	37	0.621622	0.798799	0.069971	0.9992
GRIN2A	CCDS10539.1	891	876	906	0.778195	22	0.545455	0.700922	0.0624387	1	38	0.631579	0.811594	0.10133	0.9995
GRIN2A	CCDS10539.1	892	877	907	0.785714	21	0.52381	0.666667	0.0362865	1	34	0.588235	0.748663	0.0351185	0.9995
GRIN2A	CCDS10539.1	893	878	908	0.779026	21	0.52381	0.67239	0.0551188	1	34	0.588235	0.75509	0.0389033	0.9995
GRIN2A	CCDS10539.1	894	879	909	0.779851	22	0.545455	0.699435	0.0612429	1	35	0.6	0.769378	0.043854	0.9995
GRIN2A	CCDS10539.1	895	880	910	0.784387	21	0.52381	0.667795	0.0373421	1	36	0.611111	0.779094	0.0604222	0.9997
GRIN2A	CCDS10539.1	896	881	911	0.785185	20	0.5	0.636792	0.0281318	1	35	0.6	0.764151	0.0397472	0.9997
GRIN2A	CCDS10539.1	897	882	912	0.778598	22	0.5	0.64218	0.0249805	1	37	0.594595	0.763674	0.0457802	0.9997
GRIN2A	CCDS10539.1	898	883	913	0.776952	22	0.5	0.643541	0.0259765	1	37	0.594595	0.765292	0.0463537	0.9997
GRIN2A	CCDS10539.1	899	884	914	0.779851	20	0.5	0.641148	0.0315963	1	35	0.6	0.769378	0.043854	0.9997
GRIN2A	CCDS10539.1	900	885	915	0.783582	19	0.526316	0.671679	0.0487115	1	33	0.606061	0.773449	0.0534865	0.9997
GRIN2A	CCDS10539.1	901	886	916	0.783582	20	0.55	0.701905	0.0766578	1	34	0.617647	0.788235	0.0792572	0.9997
GRIN2A	CCDS10539.1	902	887	917	0.774436	20	0.55	0.710194	0.0834561	1	34	0.647059	0.835523	0.172698	0.9997
GRIN2A	CCDS10539.1	903	888	918	0.778195	19	0.631579	0.811594	0.271003	1	33	0.69697	0.895623	0.396103	0.9997
GRIN2A	CCDS10539.1	904	889	919	0.784906	16	0.6875	0.875901	0.487698	1	30	0.733333	0.934295	0.609413	0.9997
GRIN2A	CCDS10539.1	905	890	920	0.788679	17	0.647059	0.820433	0.349973	1	30	0.7	0.88756	0.362662	0.999767
GRIN2A	CCDS10539.1	906	891	921	0.788679	15	0.733333	0.929825	0.657788	1	28	0.75	0.950957	0.734	0.9998
GRIN2A	CCDS10539.1	907	892	922	0.781955	16	0.8125	1.03906	1	1	29	0.793103	1.01426	1	0.9998
GRIN2A	CCDS10539.1	908	893	923	0.781955	16	0.8125	1.03906	1	1	28	0.785714	1.00481	1	0.9998
GRIN2A	CCDS10539.1	909	894	924	0.781955	16	0.8125	1.03906	1	1	29	0.793103	1.01426	1	0.9998
GRIN2A	CCDS10539.1	910	895	925	0.774436	15	0.8	1.03301	1	1	25	0.76	0.981359	0.875239	0.9998
GRIN2A	CCDS10539.1	911	896	926	0.779026	15	0.8	1.02692	1	1	25	0.76	0.975577	0.873878	0.9998
GRIN2A	CCDS10539.1	912	897	927	0.775281	17	0.823529	1.06223	0.857537	1	26	0.769231	0.992196	1	0.9998
GRIN2A	CCDS10539.1	913	898	928	0.775281	17	0.823529	1.06223	0.857537	1	27	0.740741	0.955448	0.737507	0.9998
GRIN2A	CCDS10539.1	914	899	929	0.775281	17	0.882353	1.13811	0.518262	1	27	0.777778	1.00322	1	0.9998
GRIN2A	CCDS10539.1	915	900	930	0.779026	16	0.875	1.1232	0.669056	1	25	0.76	0.975577	0.873878	0.9997
GRIN2A	CCDS10539.1	916	901	931	0.784387	17	0.882353	1.1249	0.674049	1	27	0.777778	0.991575	1	0.9997
GRIN2A	CCDS10539.1	917	902	932	0.795539	18	0.888889	1.11734	0.67702	1	28	0.785714	0.98765	0.877509	0.9997
GRIN2A	CCDS10539.1	918	903	933	0.796296	18	0.888889	1.11628	0.676595	1	28	0.785714	0.986711	0.877252	0.9997
GRIN2A	CCDS10539.1	919	904	934	0.8	18	0.888889	1.11111	0.6752	1	28	0.785714	0.982143	0.875789	0.999633
GRIN2A	CCDS10539.1	920	905	935	0.796296	18	0.833333	1.04651	1	1	27	0.777778	0.976744	0.874518	0.9995
GRIN2A	CCDS10539.1	921	906	936	0.794776	19	0.789474	0.993328	1	1	27	0.740741	0.932012	0.582068	0.9995
GRIN2A	CCDS10539.1	922	907	937	0.794776	20	0.8	1.00657	1	1	27	0.777778	0.978612	0.875149	0.9995
GRIN2A	CCDS10539.1	923	908	938	0.790262	20	0.8	1.01232	1	1	27	0.777778	0.984202	0.875929	0.9995
GRIN2A	CCDS10539.1	924	909	939	0.790262	20	0.8	1.01232	1	1	27	0.777778	0.984202	0.875929	0.9995
GRIN2A	CCDS10539.1	925	910	940	0.790262	20	0.8	1.01232	1	1	27	0.777778	0.984202	0.875929	0.9995
GRIN2A	CCDS10539.1	926	911	941	0.781955	21	0.809524	1.03526	1	1	25	0.76	0.971923	0.872939	0.9995
GRIN2A	CCDS10539.1	927	912	942	0.785714	21	0.809524	1.0303	1	1	26	0.769231	0.979021	0.875149	0.9995
GRIN2A	CCDS10539.1	928	913	943	0.791667	20	0.85	1.07368	0.861755	1	25	0.8	1.01053	1	0.9995
GRIN2A	CCDS10539.1	929	914	944	0.791667	20	0.85	1.07368	0.861755	1	25	0.8	1.01053	1	0.9995
GRIN2A	CCDS10539.1	930	915	945	0.796226	21	0.857143	1.07651	0.715848	1	27	0.814815	1.02335	1	0.9995
GRIN2A	CCDS10539.1	931	916	946	0.792453	20	0.85	1.07262	0.861755	1	26	0.807692	1.01923	1	0.9995
GRIN2A	CCDS10539.1	932	917	947	0.788679	18	0.833333	1.05662	0.859639	1	24	0.791667	1.00379	1	0.9995
GRIN2A	CCDS10539.1	933	918	948	0.790262	18	0.833333	1.0545	1	1	23	0.782609	0.990315	1	0.9995
GRIN2A	CCDS10539.1	934	919	949	0.797753	17	0.823529	1.03231	1	1	22	0.772727	0.96863	0.862963	0.9995
GRIN2A	CCDS10539.1	935	920	950	0.797753	17	0.823529	1.03231	1	1	22	0.772727	0.96863	0.862963	0.9995
GRIN2A	CCDS10539.1	936	921	951	0.794776	17	0.882353	1.11019	0.671922	1	22	0.818182	1.02945	1	0.9995
GRIN2A	CCDS10539.1	937	922	952	0.801498	17	0.882353	1.10088	0.672592	1	22	0.818182	1.02082	1	0.9995
GRIN2A	CCDS10539.1	938	923	953	0.808271	16	0.875	1.08256	0.836695	1	21	0.809524	1.00155	1	0.9995
GRIN2A	CCDS10539.1	939	924	954	0.808271	16	0.875	1.08256	0.836695	1	22	0.818182	1.01226	1	0.9995
GRIN2A	CCDS10539.1	940	925	955	0.804511	17	0.882353	1.09676	0.673381	1	22	0.818182	1.01699	1	0.9995
GRIN2A	CCDS10539.1	941	926	956	0.808271	17	0.882353	1.09166	0.839997	1	22	0.818182	1.01226	1	0.9995
GRIN2A	CCDS10539.1	942	927	957	0.800752	17	0.882353	1.10191	0.672531	1	22	0.818182	1.02177	1	0.9995
GRIN2A	CCDS10539.1	943	928	958	0.805243	15	0.866667	1.07628	0.835664	1	20	0.8	0.993488	1	0.9995
GRIN2A	CCDS10539.1	944	929	959	0.812734	16	0.875	1.07661	0.836569	1	22	0.818182	1.0067	1	0.9995
GRIN2A	CCDS10539.1	945	930	960	0.82397	15	0.866667	1.05182	1	1	22	0.818182	0.992975	1	0.9995
GRIN2A	CCDS10539.1	946	931	961	0.831461	16	0.8125	0.977196	0.831183	1	22	0.818182	0.984029	0.856358	0.9995
GRIN2A	CCDS10539.1	947	932	962	0.834586	15	0.8	0.958559	0.820884	1	20	0.8	0.958559	0.845	0.9995
GRIN2A	CCDS10539.1	948	933	963	0.823308	14	0.714286	0.86758	0.413884	1	19	0.736842	0.894977	0.468188	0.9995
GRIN2A	CCDS10539.1	949	934	964	0.822642	16	0.75	0.911697	0.629616	1	21	0.761905	0.926169	0.508541	0.9995
GRIN2A	CCDS10539.1	950	935	965	0.811321	17	0.705882	0.870041	0.474779	1	23	0.73913	0.911021	0.526104	0.9995
GRIN2A	CCDS10539.1	951	936	966	0.818868	16	0.75	0.915899	0.634028	1	22	0.772727	0.943653	0.678329	0.9997
GRIN2A	CCDS10539.1	952	937	967	0.820225	16	0.8125	0.990582	1	1	22	0.818182	0.997509	1	0.9997
GRIN2A	CCDS10539.1	953	938	968	0.812734	14	0.785714	0.966754	0.825646	1	20	0.8	0.984332	0.856825	0.9997
GRIN2A	CCDS10539.1	954	939	969	0.813433	15	0.8	0.983486	0.835859	1	21	0.809524	0.995194	1	0.9997
GRIN2A	CCDS10539.1	955	940	970	0.809701	17	0.823529	1.01708	1	1	24	0.791667	0.977727	0.865972	0.9997
GRIN2A	CCDS10539.1	956	941	971	0.808989	16	0.8125	1.00434	1	1	23	0.782609	0.967391	0.862849	0.9997
GRIN2A	CCDS10539.1	957	942	972	0.812734	15	0.8	0.984332	0.836514	1	24	0.75	0.922811	0.538253	0.9997
GRIN2A	CCDS10539.1	958	943	973	0.808989	15	0.8	0.988889	1	1	24	0.75	0.927083	0.545161	0.9997
GRIN2A	CCDS10539.1	959	944	974	0.810409	14	0.785714	0.969528	0.827439	1	23	0.73913	0.912046	0.527294	0.9995
GRIN2A	CCDS10539.1	960	945	975	0.811808	14	0.785714	0.967857	0.826102	1	23	0.73913	0.910474	0.525608	0.9995
GRIN2A	CCDS10539.1	961	946	976	0.811808	13	0.769231	0.947552	0.817441	1	22	0.727273	0.895868	0.385734	0.9995
GRIN2A	CCDS10539.1	962	947	977	0.811808	14	0.785714	0.967857	0.826102	1	23	0.73913	0.910474	0.525608	0.9995
GRIN2A	CCDS10539.1	963	948	978	0.814126	14	0.785714	0.965101	0.824887	1	23	0.73913	0.907882	0.523	0.9995
GRIN2A	CCDS10539.1	964	949	979	0.814126	14	0.785714	0.965101	0.824887	1	23	0.73913	0.907882	0.523	0.9995
GRIN2A	CCDS10539.1	965	950	980	0.814126	14	0.785714	0.965101	0.824887	1	23	0.73913	0.907882	0.523	0.9995
GRIN2A	CCDS10539.1	966	951	981	0.814126	14	0.785714	0.965101	0.824887	1	23	0.73913	0.907882	0.523	0.999433
GRIN2A	CCDS10539.1	967	952	982	0.813433	14	0.785714	0.965924	0.82512	1	23	0.73913	0.908656	0.523755	0.9994
GRIN2A	CCDS10539.1	968	953	983	0.813433	14	0.785714	0.965924	0.82512	1	23	0.73913	0.908656	0.523755	0.9994
[truncated: 11,388 more rows]
